# Supplementary material for: Multicenter validation of a machine learning phase space electro-mechanical pulse wave analysis to predict elevated left ventricular end diastolic pressure at the point-of-care
Source: PLoS One. 2022 Nov 15;17(11):e0277300. doi: 10.1371/journal.pone.0277300 (PMC9665374; doi:10.1371/journal.pone.0277300)
Supplement: S11 File — (XLSX) [file pone.0277300.s011.xlsx]

## Sheet: CADLAD_CADHealth_LVEDP_developm
ID	LVEDP>=25	DCA_4	DCA_5	DCA_6	DCA_7	DCA_8	DCA_9	DCA_10	DCA_11	DCA_12	DCA_13	DCA_14	DCA_15	DCA_16	DCA_17	DCA_18	DCA_19	DCA_20	DCA_21	DCA_22	DCA_23	DCA_24	RCA_25	RCA_26	RCA_27	RCA_28	RCA_29	RCA_30	RCA_31	RCA_32	RCA_33	RCA_34	RCA_35	RCA_36	RCA_37	RCA_38	RCA_39	RCA_40	RCA_41	RCA_42	RCA_43	RCA_44	RCA_45	RCA_46	RCA_47	RCA_48	RCA_49	RCA_50	RCA_51
CADLAD_1	1	1008.89	0.10654	0.635132	0.127803	0.192375	0.0447479	327.537	1.18408	498.23	0.929966	607.367	0.573187	139.034	1.84508	1.66352	265.957	0.782549	12.4449	163.991	0.254465	0.230628	90.8417	0.871095	0.81704	0.933424	0.328933	0.111588	34.1091	1.5082	0.480094	0.466274	0.70396	58.9571	46.4922	5.50816	116.926	501.275	2.29896	0.689255	0.72714	130.777	0.785529	0.572465	143.115	160.769	133.714	0.831712	0.806233
CADLAD_2	0	906.114	0.12224	0.67048	0.0769067	0.122651	0.0284945	314.392	1.40204	483.527	0.967935	599.526	0.667506	149.78	1.89095	2.24599	235.275	1.75715	8.91662	184.865	0.332536	0.31345	82.6659	0.957422	0.915904	0.960865	0.384413	0.0825856	29.5323	0.793973	0.41557	0.222231	0.448286	69.0118	60.7472	4.07072	138.723	506.095	1.62108	0.899574	0.884326	154.39	0.897669	0.56967	160.813	168.764	154.533	0.915676	0.880769
CADLAD_3	1	895.459	0.0994778	0.466669	0.0322847	0.0502778	0.0274803	550.228	4.59194	201.649	0.910705	259.635	0.639919	38.2356	1.25636	1.11661	49.054	0.580015	10.0636	53.7446	0.166382	0.124867	115.901	0.769257	0.622946	0.783201	0.418151	0.0945796	15.7234	0.265155	0.61625	0.11295	0.46747	23.5082	16.648	29.471	23.9856	636.368	1.45767	0.742417	0.366318	25.0831	0.636081	0.547572	22.7918	24.6187	18.3816	0.746652	0.629895
CADLAD_4	1	778.785	0.166306	0.675986	0.399472	1.66206	0.229197	346.22	1.00065	471.067	0.819546	502.419	0.489608	103.074	2.27795	2.51996	198.029	0.878089	9.83116	200.112	0.332319	0.338431	97.4652	0.868653	0.79703	0.919025	0.632397	0.51299	33.4287	1.49105	0.524956	0.468257	0.523299	79.8043	66.7088	5.83816	114.951	500.733	2.63353	0.702929	0.507327	114.437	0.585761	0.355985	99.753	135.567	81.6656	0.6024	0.635307
CADLAD_5	0	1018.94	0.0515422	0.480929	0.3217	0.651909	0.0772277	381.782	1.14489	420.923	0.948827	506.09	0.592007	126.562	2.04499	2.62132	115.295	1.20269	6.87521	128.135	0.198831	0.197461	105.695	0.645282	0.383325	0.606105	0.630712	0.371035	30.2173	1.78966	0.786913	0.708156	0.706358	39.5363	33.4657	8.94508	59.5175	508.68	3.4826	0.803515	0.333531	74.7734	0.652354	0.263536	88.0544	92.0902	78.5424	0.852885	0.865672
CADLAD_6	1	711.885	0.0870109	0.445846	0.0601986	0.0974637	0.0477044	278.483	1.0533	428.926	0.96937	603.82	0.630708	132.295	1.19958	2.26399	201.84	1.38453	8.24308	152.633	0.244982	0.247156	94.0311	0.847608	0.730656	0.854008	0.377952	0.174235	36.7308	0.346756	0.404463	0.144174	0.499403	65.0186	51.8663	5.66831	111.275	483.658	2.45871	0.636523	0.318572	141.394	0.7097	0.428532	154.237	182.564	146.595	0.802975	0.79143
CADLAD_7	0	980.47	0.131083	0.688148	0.0790365	0.156084	0.0463962	413.478	1.15167	432.223	0.967878	477.721	0.561525	184.315	3.19186	2.64575	212.332	2.18744	6.2564	247.283	0.565274	0.532817	102.091	0.79047	0.655532	0.840538	0.457924	0.117813	47.3646	1.90599	0.721469	0.797602	0.847565	95.8339	93.569	4.50524	121.122	501.833	2.0977	0.800781	0.561175	136.486	0.787087	0.602833	159.685	162.144	146.834	0.905577	0.917117
CADLAD_8	1	898.088	0.137707	0.732225	0.0605108	0.155418	0.0501571	340.489	1.22809	495.755	0.932736	521.211	0.757881	101.908	1.16251	1.44113	153.47	0.968302	8.53393	181.862	0.296177	0.324609	93.7882	0.948844	0.925087	0.955278	0.561302	0.11896	35.0421	1.25112	0.788585	0.56813	0.905219	98.4186	95.1993	5.40517	100.245	543.015	2.14711	0.921613	0.600287	126.088	0.912349	0.77504	106.805	115.605	101.335	0.876561	0.864313
CADLAD_9	0	802.959	0.0954067	0.618252	0.0548417	0.0758142	0.022206	277.538	1.05613	482.677	0.989239	632.085	0.432056	211.851	2.98022	2.35623	329.694	1.624	8.99305	231.206	0.338258	0.299061	91.5499	0.757191	0.608173	0.79689	0.276131	0.0868529	39.357	1.51566	0.687339	0.50937	0.764662	78.1746	74.0551	5.39115	108.436	510.857	2.08443	0.846444	0.719266	182.261	0.906384	0.668366	231.994	238.704	220	0.921646	0.880716
CADLAD_10	0	911.044	0.129323	0.702059	0.0584651	0.0950714	0.0334234	359.805	1.35795	424.731	0.943186	704.943	0.564383	278.359	2.76076	2.27628	304.831	1.56481	5.67088	218.143	0.342087	0.312551	100.76	0.722814	0.561387	0.775494	0.582655	0.222733	36.3203	0.969647	0.603319	0.366972	0.830973	58.8766	52.3175	6.17161	84.5472	494.753	2.60372	0.895044	0.533393	150.521	0.946155	0.831119	189.64	204.679	180.083	0.879829	0.952648
CADLAD_11	1	966.989	0.0845121	0.666432	0.194908	0.27448	0.0587847	280.206	1.57396	443.042	0.980437	519.214	0.614749	168.702	4.28327	1.42216	260.755	1.08157	6.68338	278.31	0.550314	0.560558	84.2212	0.905634	0.820647	0.908839	0.607864	0.146014	39.9032	1.55689	0.781689	0.493117	0.799316	78.2585	71.3964	4.75504	110.937	506.093	1.95775	0.925042	0.690186	133.576	0.924803	0.74399	184.312	187.846	177.08	0.942686	0.946462
CADLAD_12	0	1085.98	0.0579405	0.366786	0.0599215	0.118715	0.0150434	298.427	1.17571	412.037	0.949367	560.938	0.331057	160.828	2.1496	1.75527	146.302	1.27714	18.1135	117.082	0.175562	0.148106	107.396	0.59961	0.344372	0.575708	0.38106	0.0347052	36.5737	1.35626	0.598957	0.424219	0.384529	59.0587	42.7672	6.91082	94.0414	525.516	3.44702	0.572236	0.379081	106.351	0.424207	0.166549	91.612	132.805	68.003	0.512051	0.510749
CADLAD_13	0	959.94	0.108258	0.565602	0.138849	0.221249	0.0515852	540.23	1.60337	448.141	0.943941	519.451	0.627113	160.158	1.28027	3.6839	276.166	1.37008	8.90208	224.333	0.387212	0.343918	95.897	0.869213	0.777303	0.915334	0.337475	0.15533	46.7487	0.851083	0.463564	0.29069	0.567748	64.0819	52.9801	4.69249	139.281	576.958	2.30916	0.769857	0.412933	158.966	0.786791	0.591755	163.965	181.539	160.243	0.882692	0.829598
CADLAD_14	1	599.298	0.200561	0.680203	0.151466	0.249876	0.0467268	311.954	1.29539	445.601	0.90639	595.924	0.563753	147.608	3.21907	2.42996	254.323	1.78516	7.40179	227.491	0.410075	0.386344	95.6342	0.958345	0.937042	0.945371	0.713793	0.47973	35.7918	1.05652	0.778742	0.604592	0.879454	79.9057	76.6229	4.55271	111.525	510.13	1.62857	0.923041	0.801991	104.659	0.859495	0.7857	156.909	165.21	156.428	0.946847	0.912495
CADLAD_15	1	806.476	0.0656259	0.338447	0.106175	0.285169	0.0463478	280.701	2.16749	607.306	0.95314	464.674	0.597185	73.5938	0.313787	0.875209	86.4028	0.379639	12.7223	120.274	0.197554	0.194924	105.008	0.783352	0.647454	0.837476	0.457411	0.0989595	35.2027	0.418708	0.444754	0.111492	0.393965	50.9839	35.362	11.8915	80.9003	637.004	2.52962	0.469104	0.497036	90.1891	0.49706	0.283497	59.1549	102.366	44.8787	0.438414	0.477271
CADLAD_16	0	729.929	0.13913	0.590447	0.0383385	0.0636802	0.0276794	413.567	1.10738	544.517	0.942094	508.578	0.740947	159.815	2.05225	2.50285	268.406	1.68801	6.12758	228.799	0.483149	0.511949	102.108	0.735868	0.518144	0.716501	0.260071	0.0514095	40.9935	0.748547	0.443248	0.254528	0.688163	98.3944	89.6266	4.08423	143.106	532.409	1.82539	0.829128	0.558426	168.087	0.785218	0.523503	189.874	198.371	175.808	0.88626	0.838315
CADLAD_17	0	914.42	0.227707	0.777903	0.788186	1.49617	0.353353	350.333	1.12274	434.744	0.982718	508.614	0.590374	125.247	2.33566	2.15061	173.419	0.795307	7.44616	244.769	0.398982	0.407275	89.0315	0.943365	0.921087	0.954711	0.619563	0.64881	35.6842	1.66523	0.77154	0.775311	0.73505	103.205	95.9272	4.45571	130.826	522.99	1.80288	0.818242	0.760828	131.837	0.859009	0.665627	162.801	189.499	154.533	0.815484	0.822904
CADLAD_18	0	671.637	0.160055	0.656432	0.0616396	0.0866286	0.0519123	337.026	1.0296	439.228	0.978917	496.333	0.743602	212.653	1.70028	1.86232	258.804	1.17587	6.52401	265.096	0.41538	0.453261	84.085	0.854749	0.673291	0.789524	0.546523	0.194972	58.7077	1.15416	0.709276	0.40232	0.873955	130.179	126.388	3.3874	154.685	506.892	1.69837	0.947274	0.606517	190.485	0.920712	0.786896	260.284	267.105	255.419	0.956251	0.915539
CADLAD_19	1	937.422	0.141007	0.680701	0.105916	0.164784	0.0614318	268.426	1.26514	509.692	0.965924	528.378	0.54974	213.048	2.77912	1.39451	225.383	0.772762	7.21738	223.804	0.408323	0.384313	106.655	0.71608	0.521392	0.752047	0.333749	0.148506	34.6176	1.32642	0.506844	0.346469	0.770754	61.1449	50.1245	5.25903	110.191	497.521	1.97297	0.799833	0.725126	125.679	0.902158	0.704037	175.489	179.847	174.944	0.972735	0.882575
CADLAD_20	0	1096.27	0.105093	0.595471	0.051469	0.118484	0.0278313	276.66	2.11374	452.333	0.854326	533.368	0.705788	106.781	1.07915	2.45999	174.175	0.92916	10.5172	153.38	0.245446	0.250066	103.269	0.620379	0.358296	0.592134	0.52441	0.041655	27.4389	0.451214	0.517729	0.0868219	0.760108	63.8637	59.4381	8.58344	72.3016	585.554	2.50684	0.824277	0.498642	95.1514	0.851702	0.371037	116.537	120.158	109.806	0.913843	0.897542
CADLAD_21	1	817.409	0.110809	0.632167	0.0751925	0.120961	0.0321356	566.742	4.1872	614.44	0.891079	246.94	0.63058	49.0974	2.6104	0.722152	73.8196	0.259245	6.72906	58.2225	0.228658	0.120638	97.7692	0.834286	0.737638	0.914915	0.524279	0.103604	21.532	1.5074	0.747834	0.375682	0.643699	25.8747	23.9593	18.3108	27.8048	493.645	1.82741	0.917022	0.779015	28.9698	0.841813	0.574441	39.4622	43.6798	36.5104	0.835864	0.82283
CADLAD_22	0	931.847	0.0898176	0.584151	0.085373	0.130982	0.0372562	462.946	1.78339	475.789	0.968966	645.558	0.707608	195.741	2.49616	1.88476	163.861	0.64328	6.90251	166.543	0.300718	0.293402	106.866	0.699538	0.433979	0.615487	0.41155	0.10482	27.2569	0.859586	0.551544	0.294539	0.672871	53.0177	45.2985	6.97636	77.0622	524.97	1.96482	0.902083	0.641955	123.247	0.939312	0.713979	122.616	128.049	119.411	0.932543	0.899006
CADLAD_23	0	1085.8	0.031276	0.527615	0.175608	0.501238	0.0351834	347.659	1.23762	479.006	0.980068	509.068	0.266864	126.451	2.63929	3.69523	170.623	1.46127	17.3544	100.793	0.151233	0.142447	114.378	0.39274	0.123593	0.309916	0.372333	0.124205	29.4752	0.79895	0.40496	0.19926	0.40693	50.757	36.7735	7.71242	94.9066	533.321	3.97768	0.454827	0.20628	102.955	0.675896	0.380982	83.9621	119.155	72.19	0.605851	0.55131
CADLAD_24	0	977.317	0.0946249	0.730079	0.0538166	0.103167	0.0332552	280.855	1.23863	619.271	0.959268	422.063	0.550512	133.784	0.400355	1.52292	111.052	0.73447	1.51007	97.7788	0.294157	0.298583	80.1487	0.973235	0.973647	0.98046	0.820429	0.374345	34.2022	1.83013	0.924047	0.662074	0.892842	48.7222	48.0686	8.92133	58.3754	521.543	1.89827	0.932353	0.579808	64.9609	0.903165	0.813201	57.5878	58.5269	56.2566	0.96121	0.974006
CADLAD_25	0	996.421	0.0611735	0.712995	0.144562	0.269447	0.106283	351.144	1.4358	592.898	0.909756	411.253	0.796294	112.576	2.58757	2.57296	120.544	1.33531	6.94054	159.649	0.325153	0.328727	114.276	0.715667	0.468721	0.71495	0.521147	0.255882	31.0879	1.57112	0.583529	0.594484	0.736764	65.4795	63.3129	7.29603	84.8345	556.834	2.32961	0.792395	0.613708	85.5906	0.897668	0.645433	92.8485	105.37	88.6293	0.841121	0.828963
CADLAD_26	0	714.478	0.0677224	0.70179	0.275718	0.46578	0.145034	579.356	1.32532	464.868	0.891941	468.369	0.80516	192.1	0.855022	2.47108	167.513	0.805359	8.76409	169.709	0.263454	0.23526	114.869	0.59823	0.336836	0.569546	0.321676	0.195094	40.716	0.639937	0.393942	0.145648	0.456654	59.0439	40.7866	8.41249	98.6336	537.453	2.92395	0.387474	0.168731	112.517	0.457561	0.178995	104.945	130.438	90.5212	0.693978	0.66422
CADLAD_27	0	860.442	0.144072	0.748196	0.188059	2.30101	0.069789	339.875	1.06427	434.031	0.837626	543.96	0.613481	191.031	1.31941	2.66581	197.767	1.16949	12.5359	145.383	0.212526	0.19658	98.9517	0.661627	0.44406	0.669773	0.517339	0.0423505	36.2703	1.38283	0.808736	0.50102	0.84673	101.975	96.1732	3.71502	146.256	541.019	1.70071	0.957834	0.671085	149.463	0.92084	0.672686	188.03	198.023	181.913	0.918647	0.907951
CADLAD_28	1	786.456	0.171822	0.835039	0.075153	0.127601	0.0555267	430.797	1.32042	449.826	0.954298	478.298	0.806233	127.171	2.43013	2.60036	261.637	1.52069	8.14363	204.383	0.380528	0.388995	99.8133	0.98758	0.972287	0.969618	0.61892	0.393208	43.1825	1.6792	0.825387	0.796333	0.960973	94.0424	90.0557	4.19443	123.25	499.893	1.74389	0.933058	0.798661	137.434	0.919279	0.796017	150.249	153.958	143.073	0.929297	0.928889
CADLAD_29	1	811.118	0.15802	0.715303	0.102327	0.125504	0.0514074	307.651	1.60898	452.023	0.941443	516.036	0.602709	135.964	3.33151	2.11639	158.751	1.26917	6.52556	198.637	0.403402	0.402482	87.6012	0.966864	0.945213	0.953554	0.395706	0.149072	43.9296	1.35744	0.777519	0.657302	0.693258	92.5336	83.8075	4.84464	116.276	552.571	1.76356	0.898734	0.644237	125.378	0.894262	0.811532	139.695	146.957	131.371	0.893939	0.91499
CADLAD_30	0	969.909	0.044649	0.545738	0.0222425	0.0653004	0.010167	315.958	1.69781	420.164	0.986446	555.787	0.363363	84.5845	3.11155	2.20334	135.827	1.82768	8.92756	162.819	0.257798	0.248286	104.008	0.640385	0.41529	0.640028	0.199698	0.0141729	47.6154	1.42495	0.334919	0.429287	0.482217	66.0694	57.9891	4.81486	122.476	564.394	2.33698	0.776851	0.646172	120.568	0.638529	0.373562	96.4994	130.767	83.1193	0.63563	0.655018
CADLAD_31	0	860.205	0.0526751	0.231341	0.0125764	0.0368026	0.00999381	345.578	1.97756	464.954	0.962085	495.626	0.451271	130.879	1.90497	2.01191	270.858	1.9315	15.734	212.213	0.481877	0.422695	112.259	0.419885	0.151068	0.359306	0.532871	0.103961	30.931	0.687235	0.572174	0.239575	0.899362	74.3152	66.5051	6.61145	89.0888	617.602	1.19321	0.84115	0.380336	107.652	0.85997	0.603448	109.088	118.699	100.881	0.849887	0.794029
CADLAD_32	0	684.965	0.136098	0.697246	0.0626696	0.0892437	0.0405238	288.519	1.39504	510.245	0.972217	563.358	0.714779	214.491	1.99183	1.84082	276.744	1.24718	7.13259	292.341	0.385088	0.388801	87.9037	0.796573	0.678459	0.852303	0.408494	0.138659	40.9394	1.01125	0.669398	0.409568	0.882741	88.5065	83.9424	4.2703	124.551	516.687	1.52664	0.918856	0.813412	181.257	0.918063	0.724817	199.29	202.974	192.416	0.947981	0.903268
CADLAD_33	0	1552.76	0.0994817	0.524546	0.874582	2.76439	0.200162	406.79	1.28078	539.283	0.948886	422.4	0.485297	74.3928	0.0568847	0.28241	202.393	0.0719047	7.56275	106.101	0.215282	0.186257	117.758	0.532261	0.199271	0.357688	0.652587	0.609129	26.7623	0.852653	0.458943	0.257612	0.576974	37.9581	28.7061	10.7335	69.7806	537.228	2.54551	0.65176	0.492142	75.6046	0.513902	0.404645	64.1568	88.355	51.2342	0.579868	0.532868
CADLAD_34	1	860.626	0.156899	0.845005	0.0359676	0.0489396	0.0176607	655.908	1.1412	443.751	0.954702	563.513	0.789567	242.358	4.03122	2.83651	308.96	2.26968	6.63977	357.67	0.659431	0.669123	87.8125	0.876207	0.745628	0.867564	0.397199	0.0328161	54.9791	1.01249	0.680896	0.446728	0.782943	166.63	153.858	3.0557	183.815	529.163	1.47936	0.910716	0.690778	212.918	0.93377	0.709404	270.236	275.881	261.968	0.949568	0.965782
CADLAD_35	0	854.634	0.161992	0.716383	0.276456	0.518559	0.164234	530.062	1.42445	433.744	0.959944	567.25	0.626943	212.015	2.85155	3.38908	296.664	2.07071	6.174	206.596	0.308076	0.308542	98.3885	0.871056	0.79069	0.896968	0.633884	0.251449	33.7122	1.60381	0.754922	0.509726	0.799688	76.7032	72.686	3.80163	140.871	516.669	1.6619	0.935611	0.756859	149.632	0.840834	0.596662	199.662	206.176	190.584	0.924379	0.890036
CADLAD_36	0	666.943	0.0906774	0.652263	0.095105	0.154452	0.0491365	257.426	1.51994	421.344	0.89419	499.784	0.509865	120.001	1.23921	2.58396	197.912	0.82086	7.08883	254.993	0.439213	0.401826	107.849	0.576137	0.295347	0.50569	0.288243	0.0785547	41.52	1.52008	0.652832	0.595828	0.633631	62.7932	51.1588	9.59955	76.4008	503.387	3.19554	0.542577	0.408005	114.745	0.450111	0.219136	95.5515	136.591	78.0212	0.571203	0.522272
CADLAD_37	0	1056.82	0.101836	0.556776	0.0750989	0.163295	0.0401855	327.595	1.73239	439.56	0.93241	524.95	0.6165	115.128	2.20557	1.23347	153.613	0.638896	8.26372	189.55	0.3835	0.36526	109.754	0.756306	0.547923	0.742834	0.405256	0.027877	40.48	0.756791	0.382853	0.185474	0.550352	57.8374	46.4001	7.11722	99.7826	520.724	2.99387	0.628248	0.391342	123.756	0.745461	0.535434	107.582	124.073	96.2113	0.775439	0.78732
CADLAD_38	0	1024.47	0.151752	0.730537	0.940582	4.62637	0.361358	576.579	2.55847	463.793	0.953684	421.146	0.716096	107.168	1.30525	2.31553	124.965	0.906609	12.8629	138.139	0.349166	0.33448	100.04	0.509643	0.235171	0.466003	0.780001	0.461432	24.3105	1.10256	0.669618	0.307176	0.63343	65.1552	58.4175	7.8709	74.1788	595.649	1.50146	0.903594	0.618041	95.2704	0.797276	0.42717	96.4887	101.145	87.8881	0.868928	0.838579
CADLAD_39	0	799.258	0.216465	0.833127	0.199917	0.304715	0.15626	508.167	1.86126	498.826	0.966206	407.021	0.757374	141.898	1.85167	1.69113	218.779	1.26717	5.09461	217.8	0.590144	0.587455	82.2142	0.960912	0.970602	0.972028	0.640096	0.46667	42.3047	1.21086	0.696659	0.525956	0.8693	92.7766	91.6466	4.26412	123.306	499.71	1.44412	0.945637	0.803924	137.294	0.916184	0.917427	146.893	154.571	139.49	0.902431	0.915896
CADLAD_40	0	997.469	0.12411	0.67721	0.0389981	0.0636102	0.0234414	399.373	1.21639	535.674	0.924434	481.977	0.516972	181.697	1.24893	1.5752	321.488	1.0134	9.0652	143.752	0.243427	0.235501	106.483	0.877448	0.784375	0.907367	0.52448	0.112584	32.2281	1.43799	0.6857	0.394406	0.742822	52.5613	44.3445	5.52003	110.704	564.106	2.2862	0.838292	0.584143	113.926	0.794874	0.631757	122.258	135.642	115.588	0.852154	0.843399
CADLAD_41	0	1063.8	0.0749857	0.559689	0.0267098	0.0853455	0.0180242	386.965	2.09626	425.381	0.941786	462.43	0.519733	90.0729	0.213673	0.121531	176.849	0.0586473	16.0159	76.9817	0.131829	0.140756	101.815	0.906547	0.831526	0.923465	0.640951	0.115748	29.3102	0.705511	0.814925	0.420246	0.733614	43.725	39.8094	9.89803	60.9145	602.097	0.813826	0.847427	0.33193	58.5697	0.83831	0.125414	66.4714	72.3156	62.1801	0.859843	0.921462
CADLAD_42	0	859.867	0.100469	0.753591	0.0367266	0.0527149	0.0232304	516.405	1.00342	541.565	0.965744	478.813	0.517427	93.1755	1.89957	1.55715	156.352	0.908889	9.04785	179.238	0.293784	0.268178	98.1739	0.797426	0.643149	0.81889	0.60981	0.157138	33.0182	1.06662	0.708931	0.438749	0.828261	65.5159	59.2856	7.18524	80.016	498.744	1.9338	0.795389	0.525611	89.2115	0.822281	0.626338	98.5294	108.936	93.9294	0.862247	0.91221
CADLAD_43	1	816.336	0.143939	0.557154	0.787278	2.51685	0.397943	365.969	1.42604	564.947	0.829656	537.492	0.541165	123.721	1.88997	3.3005	133.796	1.93134	10.9969	146.163	0.245018	0.239128	106.358	0.834681	0.68529	0.869183	0.729427	0.4893	47.1176	1.64693	0.81439	0.622556	0.765208	63.1905	56.4953	7.03808	82.5927	553.662	2.81611	0.828842	0.680435	93.0456	0.683433	0.471961	86.5451	97.2623	77.0018	0.791692	0.816243
CADLAD_44	0	801.711	0.118378	0.619077	0.191942	0.263599	0.0697418	257.357	0.978955	511.875	0.962647	481.475	0.761977	169.518	1.04575	1.50128	190.109	1.15608	11.0696	129.689	0.211814	0.200826	106.615	0.660133	0.443739	0.656637	0.364298	0.107575	33.543	2.04453	0.565157	0.606699	0.417401	57.5134	46.3419	7.56443	97.3526	529.301	3.4787	0.532399	0.246901	97.8307	0.636269	0.599169	83.5395	129.148	68.1326	0.527554	0.486752
CADLAD_45	0	938.008	0.0891508	0.455648	0.0845762	0.149317	0.0289104	288.538	2.40668	646.896	0.807232	613.457	0.510684	132.426	0.205018	0.553534	149.758	0.217367	0.649505	175.639	0.439628	0.420625	104.185	0.562611	0.295731	0.499213	0.405128	0.0767866	27.7614	0.542388	0.36604	0.12067	0.652149	52.4424	41.961	12.7245	51.1486	586.787	3.76927	0.747502	0.156829	70.1719	0.759156	0.364572	66.2859	69.07	56.5027	0.818049	0.830867
CADLAD_46	0	1064.42	0.0783468	0.576369	0.0712182	0.115697	0.0330517	400.592	3.20081	521.607	0.955209	452.339	0.508511	101.26	0.0944782	0.209137	165.827	0.16317	1.54283	138.088	0.617974	0.648811	110.236	0.752602	0.547853	0.720597	0.411133	0.156284	24.1023	1.28295	0.621011	0.374047	0.595042	47.7478	43.7962	9.10235	64.9737	580.556	0.484787	0.863752	0.514232	63.8875	0.848894	0.71517	89.1345	92.3591	79.585	0.861691	0.893532
CADLAD_47	1	952.136	0.0930908	0.666713	0.167911	0.315583	0.0354505	300.655	1.18735	456.588	0.866382	552.519	0.568872	139.257	2.91779	1.64354	177.314	0.790037	1.4199	116.017	0.234893	0.224873	105.614	0.782384	0.56198	0.738942	0.300992	0.0497745	30.6598	1.26996	0.575985	0.315889	0.679055	66.6793	61.7571	6.18205	88.7739	529.127	2.74886	0.813326	0.458256	103.212	0.75199	0.464033	94.9718	102.248	85.8118	0.839249	0.881645
CADLAD_48	0	776.21	0.134621	0.824321	0.0468714	0.0640841	0.0248532	425.371	2.07982	528	0.967048	380.465	0.820695	193.941	0.308381	0.336389	261.22	0.216976	0.85161	171.978	0.410524	0.400165	100.028	0.752882	0.632508	0.814426	0.436224	0.0592293	57.7056	0.78599	0.73123	0.289763	0.865371	100.057	90.1177	4.82357	137.045	637.137	2.21527	0.831227	0.322335	151.259	0.938135	0.493444	176.046	188.189	168.467	0.895204	0.838181
CADLAD_49	0	867.771	0.0610819	0.441106	0.112585	0.155721	0.0595498	521.803	1.16123	538.149	0.915315	545.185	0.591982	109.268	0.726643	0.377069	240.817	0.182785	8.74985	191.495	0.357343	0.41119	116.628	0.76635	0.576084	0.760578	0.655202	0.220828	25.9729	1.12975	0.639967	0.313282	0.694938	38.2526	33.24	10.4689	55.1771	537.226	3.73087	0.661495	0.216761	61.9232	0.684826	0.2372	57.713	72.5025	51.5211	0.710611	0.710657
CADLAD_50	0	1197.61	0.0553557	0.554647	0.193504	0.491755	0.0563833	378.247	1.47239	428.789	0.723289	480.716	0.503925	92.4267	2.18358	2.68711	229.244	1.64743	10.3127	138.929	0.312728	0.384733	116.009	0.734554	0.506955	0.711161	0.343614	0.0977224	27.8186	0.352671	0.525503	0.20456	0.552477	29.7237	18.3198	7.36857	92.4723	511.07	0.334796	0.604493	0.202501	58.6995	0.644571	0.101207	56.3544	62.4669	43.7953	0.701096	0.691525
CADLAD_51	0	997.595	0.0583605	0.519888	0.130082	0.174941	0.0528336	763.092	4.37863	346.827	0.939756	291.189	0.537758	39.6759	1.38762	1.54122	133.079	0.783027	5.3074	71.3139	0.261174	0.105354	118.539	0.523891	0.276956	0.527764	0.550121	0.0729256	21.3744	0.532178	0.575157	0.120409	0.546122	25.2055	22.2247	25.3928	35.0523	643.577	3.6896	0.57805	0.273091	51.3596	0.540426	0.493011	47.9738	69.5576	36.668	0.52716	0.40095
CADLAD_52	1	956.635	0.0477488	0.638699	0.0365037	0.0899511	0.0215047	647.531	2.03343	563.245	0.978846	483.305	0.50084	93.2081	0.0370037	0.0823883	110.384	0.0463291	0.478408	215.169	0.477628	0.467575	111.919	0.549342	0.275584	0.503462	0.47795	0.0216524	30.4755	1.11403	0.729643	0.300857	0.604181	37.0229	27.9937	8.22325	74.5972	586.293	0.729927	0.774928	0.203157	100.628	0.842281	0.194288	119.632	125.499	108.837	0.867233	0.823422
CADLAD_53	0	898.03	0.0863298	0.532444	0.169291	0.329318	0.0495351	289.711	1.40848	473.906	0.95675	611.709	0.455615	136.823	2.37161	3.15535	300.274	2.18669	12.0873	185.017	0.267683	0.255186	109.878	0.59462	0.384373	0.649538	0.527237	0.197649	30.3932	1.14821	0.580885	0.234866	0.646184	58.9602	46.7273	7.44892	87.9875	592.099	2.65051	0.752633	0.55734	77.0893	0.644046	0.270834	145.582	152.654	127.568	0.835668	0.880703
CADLAD_54	0	1042.01	0.0588454	0.647651	0.0146441	0.0234602	0.00964463	296.64	1.27163	506.267	0.910293	568.635	0.688388	117.084	2.01645	2.29448	272.156	1.49147	9.82767	290.183	0.507821	0.453557	114.375	0.527078	0.28463	0.500081	0.422759	0.0717926	34.2143	1.09504	0.372811	0.251314	0.622641	47.9772	38.7471	7.12388	91.7484	503.928	3.21712	0.588055	0.321649	80.3102	0.692819	0.411075	87.4573	101.463	74.1051	0.730367	0.773209
CADLAD_55	0	1082.2	0.0380136	0.522879	0.19087	0.390392	0.0653055	285.582	1.64631	442.278	0.852607	454.407	0.509909	116.028	1.08649	2.80046	138.015	1.30287	16.0682	131.886	0.213436	0.239884	108.959	0.767203	0.508034	0.756792	0.39205	0.198531	28.734	1.5105	0.544969	0.371431	0.506135	49.9815	36.379	10.2236	85.0025	610.108	4.26415	0.461198	0.354015	101.687	0.409888	0.145526	91.112	128.07	69.6435	0.543792	0.479241
CADLAD_56	0	945.73	0.0952564	0.602958	0.0829133	0.124541	0.0489137	830.638	2.72256	588.883	0.697846	257.489	0.767805	59.0029	0.329971	1.59459	95.0515	0.708922	6.08202	113.151	0.401872	0.418354	100.832	0.796155	0.676727	0.85997	0.314286	0.0677746	28.04	0.219908	0.583183	0.348761	0.507971	34.8323	27.6948	11.3486	55.3727	568.267	1.83814	0.672039	0.509052	66.6149	0.695739	0.265789	48.4277	55.4944	44.4357	0.800724	0.707448
CADLAD_57	0	848.093	0.144654	0.540174	0.0402288	0.0739429	0.0265606	293.77	3.48413	589.171	0.935574	530.532	0.413544	95.6501	1.66555	0.777525	121.043	0.371754	1.78998	149.062	0.298375	0.275817	110.175	0.643036	0.384624	0.620867	0.640002	0.135991	31.6077	1.32089	0.822535	0.459609	0.738513	41.6163	36.4567	8.93606	66.379	600.579	1.7313	0.895798	0.795057	48.0265	0.859155	0.312619	63.7786	69.8294	55.5773	0.795901	0.831929
CADLAD_58	0	985.978	0.357496	0.902961	0.12007	0.298061	0.0714785	379.681	1.85158	533.979	0.97774	387.944	0.858784	200.653	2.85224	2.95617	253.933	2.1878	5.37222	255.918	0.686011	0.667124	78.9503	0.957147	0.976342	0.974481	0.843051	0.41936	50.2669	1.31707	0.824224	0.7149	0.900695	124.413	121.082	3.45042	161.091	528.314	1.34826	0.914967	0.80615	186.779	0.950637	0.84328	216.816	225.617	211.937	0.939367	0.950168
CADLAD_59	0	991.819	0.0770227	0.614604	0.104645	0.198183	0.0230097	397.682	1.15099	440.792	0.958544	461.489	0.773226	77.2931	0.0295643	0.0808409	98.237	0.0543079	2.02011	86.2185	0.171812	0.190244	95.5114	0.900845	0.840462	0.92781	0.339206	0.0693502	34.83	1.13379	0.558097	0.412311	0.887173	75.5237	72.4176	7.80066	88.1943	584.907	0.617079	0.733159	0.265268	137.767	0.8746	0.73909	88.7174	115.132	75.456	0.655384	0.646178
CADLAD_60	0	592.153	0.110806	0.43937	0.0483358	0.0834273	0.0324706	557.408	1.84905	652.302	0.755558	444.872	0.743923	93.0538	0.392495	2.01093	117.935	1.00594	1.61629	80.666	0.181141	0.17243	111.38	0.633116	0.400026	0.630934	0.501659	0.374462	15.6133	1.12914	0.817626	0.419689	0.675431	33.1524	28.9974	15.3499	49.0745	635.508	1.09351	0.722478	0.40386	56.1504	0.658347	0.378607	35.8499	45.5644	33.3101	0.731055	0.768758
CADLAD_61	0	1146.81	0.109072	0.668356	0.0173569	0.0392549	0.0102509	421.475	1.77437	421.591	0.827501	598.762	0.550316	85.8875	1.20387	2.06144	124.278	0.867236	15.551	140.092	0.217642	0.232954	111.154	0.608604	0.389483	0.616375	0.538597	0.140641	26.0124	0.895011	0.690328	0.219534	0.671557	63.0103	58.581	8.6378	64.2956	530.449	2.80966	0.860338	0.566037	92.7142	0.740096	0.29337	95.6989	107.408	75.0951	0.699155	0.688487
CADLAD_62	0	1055.66	0.0368747	0.710122	0.0461773	0.0616249	0.020235	719.682	3.4043	192.677	0.663263	395.337	0.00768616	66.1812	1.133	1.07246	65.671	0.479492	12.2421	110.208	0.376552	0.286934	116.875	0.687528	0.434307	0.63446	0.371009	0.113297	19.9851	0.258813	0.628789	0.0348425	0.549439	2.27194	1.73299	27.9759	31.9819	662.524	5.82345	0.509501	0.0715778	26.7506	0.327277	0.228304	17.6611	22.0885	10.3444	0.468315	0.346709
CADLAD_63	0	1011.03	0.0555645	0.224501	0.0318301	0.047485	0.0137671	692.955	2.62237	406.21	0.867972	399.773	0.0490447	167.182	0.0664007	0.111137	134.836	0.0807668	3.65337	216.01	0.417266	0.455423	119.796	0.541389	0.294555	0.504354	0.581974	0.305824	29.7152	0.943759	0.496768	0.194278	0.586163	31.7209	22.9824	18.7321	39.6558	592.699	4.35615	0.622419	0.203398	29.3478	0.738937	0.481987	33.3184	37.9484	25.7564	0.678722	0.67828
CADLAD_64	0	1086.5	0.0814128	0.575455	0.204376	0.38542	0.0763437	369.106	1.80575	430.496	0.981122	476.018	0.734574	129.516	3.11486	1.7238	199.136	0.892849	13.1713	167.731	0.322055	0.300873	107.758	0.747379	0.512138	0.717613	0.596463	0.0971219	31.7789	0.725417	0.530379	0.213136	0.562463	50.6858	38.5527	8.32691	83.3141	544.58	3.00154	0.642349	0.352424	98.5487	0.66799	0.29409	88.1499	96.3525	80.5172	0.835653	0.84185
CADLAD_65	0	849.905	0.161052	0.794583	0.285424	0.566571	0.0655146	417.4	1.97493	465.077	0.95382	525.6	0.528511	134.961	0.0739535	0.705428	159.129	0.356865	0.842667	167.811	0.351404	0.349045	88.7657	0.875121	0.840277	0.955492	0.438385	0.105659	31.3975	1.31164	0.750037	0.397138	0.827523	56.9164	53.1181	7.10232	80.1987	580.42	1.58441	0.950588	0.715231	120.282	0.952313	0.555714	129.305	137.147	124.683	0.90912	0.915762
CADLAD_66	1	616.926	0.0658366	0.642342	0.231229	0.364517	0.0806727	399.308	1.91309	439.038	0.933746	446.886	0.680363	141.625	2.84565	4.08067	196.419	2.35763	12.7071	176.307	0.344022	0.29897	109.589	0.702224	0.473047	0.694305	0.690577	0.191666	37.2077	1.49715	0.829821	0.605764	0.845353	54.844	51.5103	8.23886	66.995	523.252	2.31665	0.893468	0.673123	59.5277	0.754065	0.443166	68.0075	75.0295	61.8884	0.824854	0.80461
CADLAD_67	0	1012.56	0.138863	0.857572	1.15963	3.16542	0.526443	600.401	21.3732	501.743	0.817068	3.0546	0.745692	2.36132	1.81024	2.52121	6.66687	1.73707	9.6117	2.22467	0.589103	0.572118	93.1278	0.876444	0.792106	0.891249	0.554989	0.148702	10.4938	1.09329	0.902197	0.565133	0.829655	3.06141	3.00505	62.0143	11.5666	661.433	2.09765	0.687303	0.428869	5.16504	0.7862	0.420784	4.72607	5.28465	4.16735	0.788577	0.846194
CADLAD_68	0	848.512	0.0592524	0.369414	0.0578017	0.10187	0.0479035	828.793	2.4658	250.145	0.891351	4.42135	0.469132	66.0599	0.362193	0.742523	33.3719	0.292863	8.71996	3.37367	0.276978	0.273834	84.3368	0.922518	0.905502	0.966767	0.39383	0.026673	21.2532	0.305023	0.61772	0.0709718	0.452539	15.4731	11.8468	20.0029	37.9403	646.255	1.33902	0.611484	0.286324	43.7719	0.590011	0.448059	5.01189	5.73635	4.49754	0.784042	0.809738
CADLAD_69	0	856.185	0.0933629	0.593593	0.0779976	0.203719	0.0216026	528.786	18.3592	596.259	0.913419	248.777	0.713697	2.28913	2.22611	3.70147	10.8854	2.24353	4.87582	3.8967	0.412863	0.427822	110.689	0.505956	0.261111	0.501247	0.543199	0.161277	26.7419	0.657375	0.588528	0.147431	0.709666	13.0911	11.4997	28.2406	25.6195	652.84	1.77933	0.849751	0.73448	17.595	0.86778	0.558722	29.7267	30.8059	28.1643	0.914249	0.898832
CADLAD_70	0	901.005	0.0710007	0.513599	0.0175148	0.0257919	0.0154244	344.333	1.40021	411.625	0.980427	516.965	0.591933	163.529	3.12418	2.38847	221.09	1.62288	8.38585	180.923	0.295649	0.263149	106.986	0.612927	0.370845	0.617506	0.349158	0.0326711	35.6489	1.78617	0.791826	0.597948	0.623101	64.7382	50.6451	5.272	110.934	510.467	1.95842	0.723241	0.571022	143.902	0.651789	0.371696	134.501	167.079	117.772	0.704885	0.695
CADLAD_71	0	780.442	0.116074	0.513602	0.0329983	0.0652783	0.0164791	863.504	1.90512	637.036	0.850637	270.095	0.322913	28.8319	1.09755	1.91772	70.0565	1.08726	9.06425	111.34	0.443355	0.109224	117.188	0.395103	0.116955	0.29173	0.394417	0.171381	22.7884	0.298799	0.622687	0.0550708	0.738463	27.8078	22.2095	15.9876	38.9811	589.921	2.56205	0.767244	0.427446	52.2295	0.706915	0.463237	41.0978	44.5333	33.6045	0.754593	0.675213
CADLAD_72	0	996.233	0.0825343	0.646106	0.245501	0.504781	0.132691	297.694	1.52983	622.902	0.693668	347.549	0.3326	54.937	1.04132	2.06474	146.594	1.29106	6.62594	43.6132	0.119609	0.0333021	115.427	0.543518	0.291564	0.538344	0.434422	0.0883755	28.9988	0.450176	0.300299	0.0794601	0.574303	39.2653	30.9187	11.2528	70.6958	535.779	1.38654	0.438162	0.111222	68.9565	0.530359	0.093223	29.4356	35.18	28.6408	0.814122	0.835482
CADLAD_73	0	951.235	0.0868826	0.624031	0.0653341	0.133655	0.0424041	284.847	2.58354	445.656	0.958944	575.521	0.708479	143.296	4.00444	2.89106	198.819	1.21645	7.50919	194.027	0.385616	0.33378	99.267	0.851858	0.711438	0.86624	0.418195	0.189219	39.4666	1.28644	0.668022	0.495537	0.672138	66.4134	56.4698	7.02627	79.2341	489.055	1.80347	0.843639	0.911528	92.4433	0.743611	0.42279	94.0164	106.506	89.5711	0.840994	0.851944
CADLAD_74	0	994.036	0.1547	0.640759	0.119947	0.271065	0.0495515	297.508	1.23281	489.138	0.966954	624.712	0.408288	152.603	0.283359	0.604725	154.774	0.370766	1.20714	150.361	0.404657	0.398268	94.1888	0.931655	0.856099	0.91774	0.647167	0.20046	29.1001	0.953446	0.66119	0.288534	0.873691	59.5122	51.7513	6.89043	76.138	492.061	2.18998	0.934963	0.661818	88.5221	0.923661	0.732995	86.2358	88.8909	82.3287	0.926177	0.929571
CADLAD_75	0	790.844	0.0748488	0.414756	0.0908709	0.166506	0.0387975	580.095	1.10672	411.545	0.932266	378.469	0.502838	131.025	0.256301	2.38521	128.379	0.807014	2.07241	140.844	0.299914	0.300163	111.317	0.687601	0.464339	0.696103	0.492182	0.233259	26.4827	0.882113	0.614716	0.261408	0.46613	38.175	23.6076	9.91371	68.3003	444.16	0.810225	0.409157	0.125024	71.0575	0.370983	0.0397944	77.5813	84.4159	67.2118	0.796198	0.743657
CADLAD_76	0	811.764	0.111521	0.557046	0.0756562	0.118994	0.0327993	327.273	1.33676	598.5	0.973301	468.381	0.63779	90.6426	0.0722506	0.0891773	123.268	0.0540894	1.1275	101.91	0.202692	0.203163	89.939	0.909642	0.872145	0.979817	0.347789	0.13839	31.721	1.20764	0.598955	0.322188	0.51836	59.2523	49.4237	6.43489	97.5778	569.993	0.569901	0.759905	0.399281	96.4331	0.697013	0.497652	88.2738	107.507	79.0827	0.735606	0.728885
CADLAD_77	1	484.399	0.112988	0.591509	0.249312	0.307252	0.141523	291.254	0.975818	596.078	0.888306	609.036	0.535284	188.304	2.09457	2.53273	291.881	1.259	9.73907	136.93	0.256869	0.294666	114.795	0.478147	0.227527	0.430774	0.478081	0.167292	24.8814	1.88059	0.793576	0.592593	0.660303	48.8235	37.7846	6.20401	94.0405	468.273	2.20608	0.658156	0.42283	80.2193	0.691569	0.511828	91.9812	104.304	79.4648	0.76186	0.804546
CADLAD_78	0	870.759	0.154747	0.843417	0.0847484	0.123409	0.0574978	319.845	2.12453	580.214	0.89365	433.74	0.509295	121.965	0.052234	0.15726	208.271	0.0893398	0.322286	181.648	0.353415	0.374047	85.6243	0.926014	0.903715	0.969979	0.62448	0.173234	26.6276	0.258882	0.75112	0.21644	0.899648	86.0095	81.7644	5.28734	116.256	591.607	0.227487	0.921971	0.807696	148.716	0.945718	0.715166	148.696	150.633	141.004	0.936077	0.931241
CADLAD_79	0	1050.55	0.0560307	0.628813	0.0313669	0.129799	0.00988392	328.159	0.977424	437.316	0.96173	582.237	0.434604	113.679	0.867789	1.24856	127.241	0.571713	14.6352	143.254	0.21447	0.20682	107.529	0.729136	0.552164	0.746989	0.423065	0.100794	25.3568	0.651615	0.437941	0.127043	0.579858	42.8593	29.5337	10.2687	60.075	541.443	4.49724	0.4869	0.114445	71.3911	0.505738	0.12495	69.112	83.3632	50.4301	0.604945	0.6023
CADLAD_80	1	1132.61	0.0923259	0.571667	0.0337649	0.0593044	0.0111282	377.772	1.05402	524.154	0.941349	543.845	0.651299	133.29	1.66816	1.02711	117.042	0.552034	10.0419	145.548	0.253351	0.299151	104.283	0.773484	0.55167	0.75608	0.473456	0.0945515	23.4914	1.84654	0.753711	0.593238	0.525495	55.0486	48.5287	7.06852	79.8234	527.775	1.93133	0.884443	0.726191	91.4367	0.908493	0.600822	85.2509	96.5744	79.3613	0.821763	0.769454
CADLAD_81	0	920.969	0.0733149	0.516991	0.560771	1.16863	0.346986	436.833	0.964806	446.726	0.91222	567.181	0.425938	123.489	1.43281	1.31467	126.505	1.02519	10.6246	171.86	0.28536	0.288216	98.4409	0.904009	0.780142	0.888182	0.488827	0.619372	33.286	0.84296	0.457293	0.297778	0.439233	53.1091	41.2486	7.24414	100.685	491.723	3.21397	0.558994	0.326821	116.842	0.467801	0.287744	96.2754	132.303	84.5487	0.639053	0.633963
CADLAD_82	0	706.713	0.111181	0.617397	0.122795	0.195154	0.0958117	275.505	1.05436	431.52	0.95183	458.729	0.666496	128.11	1.19148	2.74146	211.433	1.90409	9.20067	175.746	0.303722	0.273272	108.642	0.460765	0.15901	0.32354	0.326636	0.139191	35.8505	1.46494	0.622317	0.47657	0.750521	76.1243	73.224	6.41578	78.96	505.236	2.8356	0.837901	0.425357	105.153	0.850344	0.393738	129.923	133.06	114.131	0.857741	0.832703
CADLAD_83	0	950.259	0.154197	0.66262	0.188323	0.336695	0.0801626	427.91	1.62113	490.117	0.885058	432.102	0.550395	88.6536	1.71467	2.94688	206.24	1.496	16.1129	82.2806	0.186367	0.19199	108.05	0.892733	0.861107	0.943595	0.397668	0.209341	36.5388	1.16434	0.456469	0.388296	0.550906	60.3623	47.0079	8.70912	80.8146	581.237	2.1894	0.667289	0.809269	83.2727	0.687245	0.646209	67.8678	86.6283	59.1772	0.683116	0.735714
CADLAD_84	0	890.143	0.29626	0.779082	0.335772	2.15977	0.159308	359.99	2.38119	546.072	0.943906	359.026	0.724644	122.129	3.99589	2.99414	186.211	2.05298	0.818163	189.165	0.421035	0.4376	87.224	0.912403	0.851991	0.951667	0.636782	0.237614	39.4609	1.14152	0.740909	0.418373	0.918592	94.3192	90.5488	4.33233	138.78	571.942	1.16962	0.890391	0.629866	114.646	0.892306	0.390434	119.722	132.453	115.121	0.869144	0.907021
CADLAD_85	1	1172.76	0.0620254	0.563207	0.0498062	0.0836317	0.0148174	293.249	1.32638	573.363	0.942849	525.998	0.510778	138.325	1.41493	1.55328	241.236	0.717131	2.35113	201.732	0.408656	0.410831	111.268	0.656763	0.400751	0.66803	0.233752	0.141104	34.4169	1.61547	0.537165	0.658532	0.425251	51.4947	36.6946	7.24408	91.8144	511.455	2.88843	0.641236	0.41351	94.8816	0.534761	0.283847	70.7512	105.132	54.8471	0.521696	0.52911
CADLAD_86	0	775.166	0.169244	0.683669	0.0902694	0.22953	0.0379696	501.972	2.27886	545.732	0.94932	355.348	0.0189553	141.027	0.124327	0.0915796	259.614	0.0732115	0.326449	167.633	0.400872	0.400928	83.1954	0.941647	0.928772	0.967306	0.694995	0.427541	21.5108	0.518782	0.698004	0.216787	0.881615	51.3263	43.7913	11.7819	48.3809	576.221	1.43397	0.92938	0.761443	71.9594	0.89112	0.538502	100.416	103.702	98.1695	0.946646	0.925875
CADLAD_87	0	988.974	0.11763	0.708951	0.0726576	0.157344	0.0432233	264.704	1.5778	553.653	0.96735	472.214	0.653985	111.86	0.356118	2.1908	187.162	1.49497	5.64157	141.78	0.632025	0.349769	92.1334	0.936765	0.882624	0.924584	0.406792	0.148456	39.2052	1.02906	0.565836	0.383728	0.70075	58.7029	56.744	6.69621	91.0107	578.094	2.18237	0.852319	0.377651	139.688	0.827111	0.474142	141.232	145.266	131.064	0.902232	0.870781
CADLAD_88	0	717.495	0.153248	0.736192	0.131768	0.218511	0.0441083	374.37	1.08092	484.553	0.963009	512.405	0.738252	167.838	1.61216	1.46996	199.235	0.675688	8.97483	186.578	0.326212	0.321774	94.2308	0.595068	0.263474	0.454284	0.513799	0.0765581	40.7543	0.847839	0.715134	0.26456	0.795478	81.175	68.7152	5.17803	110.519	574.491	2.82662	0.896514	0.406774	145.435	0.869803	0.425143	156.228	158.117	149.8	0.947404	0.865218
CADLAD_89	0	1134.11	0.104771	0.590399	0.291044	0.471411	0.117149	485.774	1.37096	451.723	0.966453	555.592	0.563381	111.899	1.48707	1.03756	122.062	0.630385	8.71998	146.799	0.268765	0.274036	94.4063	0.918965	0.891746	0.927023	0.455226	0.180714	29.987	1.4199	0.441245	0.354774	0.746236	46.8915	33.4079	7.20736	81.7593	534.25	2.29476	0.795342	0.496898	82.6168	0.870971	0.716698	74.6777	83.0978	63.9842	0.769986	0.769663
CADLAD_90	0	1110.56	0.0786466	0.760628	0.0707702	0.188294	0.034075	835.36	2.12831	494.568	0.936519	272.471	0.476847	106.962	2.8493	2.31194	80.1078	1.95802	7.83671	83.0175	0.379509	0.190693	105.092	0.743473	0.643612	0.83262	0.508808	0.332567	26.0784	0.568299	0.678756	0.407291	0.626239	34.7304	32.6112	13.7086	49.5264	629.4	2.269	0.559489	0.435431	59.7233	0.775015	0.429454	37.995	41.6941	35.7072	0.856408	0.699342
CADLAD_91	0	704.227	0.101538	0.722631	0.07111	0.0909686	0.0424613	441.257	1.99477	666.968	0.978746	517.689	0.579739	111.869	1.13134	1.1348	182.432	0.78411	4.19891	177.985	0.304241	0.313976	102.978	0.614294	0.309131	0.503953	0.292048	0.0327537	34.1641	0.404094	0.445843	0.124465	0.538427	63.9109	52.4935	7.22621	103.104	569.271	4.34712	0.594624	0.13749	129.099	0.602973	0.203553	107.522	138.117	94.862	0.686826	0.6179
CADLAD_92	0	883.777	0.198184	0.695681	0.0480225	0.0684186	0.0304354	262.097	1.00331	455.722	0.971052	530.66	0.691158	150.589	2.11073	1.89306	226.228	1.4626	7.0956	167.905	0.29818	0.313699	99.5734	0.8018	0.631739	0.793716	0.553127	0.23553	54.6545	1.4772	0.679805	0.610813	0.844148	91.6152	85.2297	4.11146	144.471	521.566	2.06819	0.802524	0.504282	163.078	0.826562	0.615394	139.739	161.988	129.999	0.802524	0.794768
CADLAD_93	0	812.627	0.0744539	0.460088	0.0690938	0.115087	0.0321204	293.759	1.65315	603.17	0.865266	475.747	0.675217	193.704	0.808876	1.27652	171.918	1.03021	11.4587	203.371	0.334856	0.292147	108.65	0.667233	0.448469	0.681885	0.35382	0.054837	25.0543	0.570018	0.584795	0.146468	0.682937	36.3951	30.1411	10.6041	58.9083	570.774	3.8381	0.740895	0.324468	62.548	0.759272	0.363225	43.5402	54.4691	37.2087	0.683116	0.725624
CADLAD_94	0	980.221	0.136224	0.622205	0.100536	0.652773	0.0594458	449.754	1.75433	468.194	0.825474	329.023	0.281135	88.0305	0.122207	0.0831675	113.349	0.0303288	16.404	84.3215	0.167588	0.17402	122.63	0.474497	0.242651	0.478535	0.604288	0.0550381	25.8833	0.582649	0.592073	0.145343	0.615743	51.5699	38.9185	11.1217	48.8841	556.394	3.2458	0.81399	0.579995	60.5658	0.719998	0.640612	80.443	97.161	65.1832	0.670878	0.665627
CADLAD_95	0	1076.35	0.0459675	0.738966	0.0808678	0.14095	0.0301655	368.767	1.04744	552.29	0.915535	604.202	0.504689	123.926	1.21518	0.930813	124.73	0.352164	13.0753	154.401	0.240113	0.224641	105.931	0.647662	0.43401	0.697524	0.403255	0.0664118	26.1729	0.817115	0.446122	0.170164	0.539134	38.4474	24.125	9.69431	62.1534	516.874	4.97254	0.533897	0.124632	67.695	0.667583	0.195737	80.8237	95.6221	63.6028	0.665148	0.673914
CADLAD_96	0	620.381	0.0697171	0.594096	0.249232	0.417048	0.0497246	783.564	1.21595	432.169	0.968655	565.073	0.489784	126.42	0.702279	1.65468	229.27	0.989242	10.6014	152.936	0.293753	0.287757	103.301	0.830572	0.69301	0.840266	0.330791	0.173001	27.9832	0.831882	0.564189	0.279257	0.567833	43.9273	36.477	8.33497	73.0587	510.119	2.63592	0.723741	0.513447	93.9688	0.779951	0.574822	91.6941	109.528	88.6863	0.809716	0.733499
CADLAD_97	1	871.56	0.116303	0.566441	0.0797364	0.149023	0.0388489	475.341	0.960313	437.527	0.963245	487.258	0.634031	196.626	3.473	1.35231	162.822	0.710769	7.64037	195.599	0.344822	0.314439	86.9858	0.905552	0.870992	0.943982	0.511151	0.133683	41.227	1.43179	0.75158	0.560654	0.791283	53.486	45.1739	7.34479	70.9666	540.766	3.66119	0.828206	0.256132	81.2382	0.871976	0.409357	128.639	143.003	116.71	0.816138	0.789664
CADLAD_98	0	937.742	0.182906	0.751402	0.0912898	0.152233	0.0577542	339.16	1.43995	522.108	0.944869	457.821	0.82058	187.717	1.66432	2.27004	221.126	1.3774	1.41794	192.169	0.469215	0.451465	96.0746	0.939	0.839462	0.891823	0.651949	0.204487	57.7587	0.831844	0.638808	0.289702	0.851692	107.403	105.167	4.91677	131.492	616.136	1.83721	0.8789	0.641985	131.733	0.929161	0.632393	184.704	193.253	179.133	0.926935	0.950605
CADLAD_99	0	883.531	0.0840583	0.423626	0.156247	0.448287	0.0701022	569.309	1.63865	539.945	0.771859	534.105	0.39698	116.859	0.431325	1.89289	131.537	0.599887	8.66966	120.612	0.208223	0.210463	99.475	0.777839	0.648766	0.858145	0.430631	0.20182	32.8995	0.476554	0.311905	0.09107	0.404544	53.8707	37.3705	10.2588	78.2128	597.379	1.79458	0.590015	0.160845	114.472	0.870059	0.73333	99.8183	133.381	87.0523	0.652656	0.663518
CADLAD_100	0	933.049	0.113157	0.7286	0.0756692	0.100771	0.0611235	327.747	2.04142	245.19	0.737744	333.196	0.705524	44.2332	1.28026	3.00051	58.5398	1.80717	0.867697	92.7206	0.228378	0.241726	98.0259	0.865776	0.785466	0.890641	0.571999	0.199622	33.2823	0.867807	0.682991	0.298223	0.699208	34.3555	29.427	8.60699	65.5375	531.584	1.88321	0.857851	0.715904	48.1879	0.846322	0.619351	54.1041	55.6203	48.806	0.877486	0.793027
CADLAD_101	0	934.65	0.0779236	0.567898	0.148952	0.308324	0.0629668	531.028	1.44593	416.92	0.953468	484.466	0.634944	106.957	0.164297	0.381689	197.614	0.217981	2.37579	88.4388	0.179488	0.193439	105.745	0.722215	0.588857	0.786835	0.554394	0.207253	23.4327	0.606123	0.536219	0.204551	0.4302	44.2809	36.275	7.78656	75.7266	546.024	2.72845	0.726701	0.367081	93.6561	0.667257	0.245405	94.2589	118.669	83.2638	0.701648	0.706875
CADLAD_102	0	903.753	0.224796	0.775259	0.628661	0.908854	0.265007	261.373	1.9919	496.338	0.9486	585.786	0.648171	112.957	1.90112	2.6655	220.528	1.907	4.41765	257.831	0.558429	0.546233	113.309	0.650476	0.446736	0.693382	0.349776	0.24497	30.8557	1.15928	0.605895	0.266142	0.747077	56.4782	50.3495	5.35208	115.441	565.428	1.60546	0.814633	0.8022	87.9768	0.913533	0.591468	114.938	116.085	108.99	0.938878	0.910442
CADLAD_103	0	1055.86	0.124445	0.660782	0.743353	1.33924	0.184875	312.729	1.23075	427.223	0.959657	607.671	0.495969	185.507	3.33319	2.77975	238.657	2.14897	11.5735	163.957	0.232967	0.210849	83.7119	0.965424	0.943806	0.979268	0.693461	0.626084	39.6884	1.08481	0.782296	0.404786	0.911114	91.4325	85.7341	3.83176	146.977	564.247	1.73632	0.906075	0.73369	146.11	0.955042	0.689346	175.118	178.41	168.277	0.943203	0.931343
CADLAD_104	0	1077.14	0.0760463	0.674119	0.04032	0.0667722	0.0132028	335.714	2.31645	492.556	0.933735	399.789	0.508365	123.892	0.0615685	0.126261	152.6	0.062052	0.372552	159.013	0.350545	0.340535	86.69	0.931644	0.917535	0.946712	0.42044	0.0866239	25.7968	0.895264	0.630688	0.28627	0.779182	60.7218	57.161	7.13152	86.5363	582.5	0.186764	0.860729	0.702946	134.784	0.904537	0.747522	109.84	116.652	99.637	0.854141	0.887836
CADLAD_105	0	892.864	0.0354243	0.405882	0.095578	0.169775	0.0194379	432.737	1.90448	642.966	0.96499	647.948	0.106151	131.322	4.27845	2.78876	247.568	1.90066	12.9528	185.461	0.277314	0.233545	113.823	0.489652	0.238667	0.474097	0.252548	0.0172236	28.3279	0.138702	0.283823	0.034557	0.311249	48.6015	29.7591	8.43235	98.1134	563.572	3.88032	0.433729	0.194415	117.267	0.644646	0.393298	107.447	137.261	90.021	0.65584	0.668793
CADLAD_106	0	1011.48	0.0904084	0.660367	0.0694239	0.205527	0.0210797	270.538	1.28911	603.328	0.978842	563.103	0.59488	150.854	0.155426	0.212729	188.689	0.12934	2.02722	171.232	0.318264	0.310724	100.82	0.728332	0.515769	0.721441	0.308106	0.0493978	32.1136	0.661001	0.354057	0.147369	0.623124	69.6475	59.0357	7.28223	93.9272	554.257	1.97041	0.683823	0.364576	139.921	0.809267	0.706543	169.449	184.045	166.419	0.904228	0.85737
CADLAD_107	0	985.118	0.0617929	0.540178	0.054098	0.102611	0.0147584	664.71	1.83217	488.617	0.919162	520.211	0.315682	130.482	0.147256	1.82307	205.445	0.68861	11.048	104.92	0.206856	0.227692	115.291	0.48234	0.188405	0.380134	0.56378	0.322393	27.7889	1.00464	0.571505	0.363965	0.513348	42.698	35.4659	9.91447	60.2766	580.792	0.990295	0.847359	0.292082	83.9269	0.735772	0.129322	91.6498	116.006	83.943	0.723611	0.669597
CADLAD_108	0	832.507	0.258722	0.830604	0.0461016	0.0802587	0.0331137	283.678	1.61905	553.435	0.961161	446.554	0.782791	158.226	2.92946	2.62747	154.514	1.2594	6.13105	148.526	0.284402	0.272863	98.8461	0.867318	0.691436	0.845587	0.384803	0.0694226	40.9298	1.17391	0.667813	0.499153	0.700783	56.5583	53.0566	6.13913	97.0295	488.356	1.75477	0.747362	0.765589	93.93	0.817607	0.780734	100.267	105.266	96.0149	0.912119	0.885386
CADLAD_109	0	860.383	0.214599	0.770142	0.0914775	0.120812	0.0757806	287.403	1.22155	580.438	0.979777	421.317	0.792802	140.767	1.5226	1.59377	166.264	0.802432	7.73255	201.623	0.334463	0.348579	84.9252	0.959489	0.948105	0.980185	0.665516	0.135111	44.2703	1.14885	0.868109	0.44915	0.893253	106.454	104.392	3.23703	162.13	491.15	1.55381	0.935584	0.708272	160.914	0.890029	0.728165	173.966	180.136	163.654	0.908506	0.916411
CADLAD_110	0	985.376	0.122636	0.578003	0.102509	0.193107	0.0508301	274.678	1.52194	459.823	0.906935	565.692	0.6147	144.793	2.35161	2.32329	175.655	1.89757	5.19171	183.583	0.359814	0.341625	95.9451	0.864312	0.821416	0.94095	0.389016	0.159139	31.1932	1.21002	0.673035	0.351791	0.846422	70.154	66.4608	5.88311	89.9406	525.335	2.28711	0.925501	0.537692	119.024	0.880415	0.688018	136.648	139.41	125.259	0.898492	0.883523
CADLAD_111	0	1053.15	0.0940191	0.528382	0.0811823	0.132983	0.0278586	731.205	1.33311	449.112	0.990212	585.268	0.546064	153.974	2.51173	1.61421	148.552	0.982064	12.9837	176.613	0.273169	0.264733	103.97	0.73895	0.57434	0.759264	0.31327	0.176536	36.3699	0.471682	0.354351	0.113564	0.648166	48.2597	38.7662	6.45861	100.59	513.89	2.49131	0.661761	0.559565	123.492	0.718212	0.473093	153.604	176.989	140.524	0.793971	0.748168
CADLAD_112	0	1010.48	0.104276	0.64823	0.0339372	0.106757	0.0229202	613.359	2.33078	533.135	0.926982	483.563	0.620018	110.662	0.799684	1.37259	133.954	0.749339	9.8096	165.609	0.283572	0.284129	98.1794	0.843032	0.680345	0.827252	0.359127	0.0302295	46.3548	1.69305	0.636151	0.749942	0.799076	86.3822	84.0111	5.51681	101.381	552.03	1.79134	0.91319	0.712093	126.419	0.782324	0.513448	124.953	149.824	114.866	0.766677	0.734289
CADLAD_113	0	867.679	0.0581882	0.516174	0.104688	0.331821	0.0468325	385.067	3.15893	428.04	0.915401	490.714	0.578114	56.8767	1.40122	2.69039	120.167	1.78938	14.7357	118.581	0.229312	0.196335	119.809	0.348947	0.104589	0.29683	0.466926	0.186512	30.9671	0.870851	0.446851	0.242593	0.407472	41.5288	36.9134	15.2473	40.3137	587.417	2.31759	0.692005	0.744322	73.1205	0.474333	0.205544	67.4738	95.6866	57.7693	0.603735	0.515987
CADLAD_114	0	832.691	0.123009	0.447349	0.383685	0.578677	0.180572	331.69	1.48813	571.187	0.955847	609.476	0.342831	170.04	0.692813	0.747995	224.782	0.476135	8.92938	196.128	0.325066	0.285613	100.061	0.845218	0.784886	0.910132	0.593887	0.290888	34.9749	0.275298	0.312728	0.0739882	0.573752	48.3112	36.1196	9.00334	74.8444	522.015	2.62986	0.648701	0.480694	105.34	0.741441	0.654159	100.017	134.219	84.4224	0.628991	0.567522
CADLAD_115	0	850.878	0.165953	0.819864	0.0630213	0.0916536	0.0514479	510.861	1.01501	461.902	0.955402	501.441	0.826571	114.72	1.88594	1.87723	190.172	0.947264	5.00432	259.935	0.489599	0.459811	98.9091	0.921594	0.804478	0.882832	0.324884	0.0506409	30.7208	0.551575	0.483395	0.133995	0.412085	58.3979	40.8708	6.19257	103.711	505.134	4.055	0.49007	0.125244	124.172	0.563133	0.323106	138.601	160.279	120.043	0.748966	0.772179
CADLAD_116	0	707.351	0.0734826	0.508408	0.0732511	0.160028	0.0517214	303.408	0.958154	430.306	0.982266	512.364	0.557679	138.632	2.37657	1.64777	189.326	0.716587	12.1933	121.804	0.191911	0.202477	103.657	0.662669	0.43407	0.687174	0.346034	0.0520456	38.6203	0.470064	0.451017	0.0743096	0.417095	63.1595	46.2108	5.37526	107.046	483.601	3.08698	0.620572	0.365518	122.745	0.612173	0.50097	121.095	145.725	101.106	0.693811	0.62431
CADLAD_117	0	937.543	0.0981911	0.664896	0.0749465	0.129723	0.0373468	466.977	1.49556	538.775	0.951154	512.934	0.57014	170.26	0.13437	0.42434	146.483	0.179765	0.995914	157.88	0.520804	0.494385	95.1018	0.837856	0.730985	0.874342	0.380069	0.108338	37.4602	1.00477	0.758283	0.381396	0.924187	92.7628	87.1451	7.07238	86.1158	522.298	2.31193	0.742207	0.518258	116.94	0.890158	0.472925	90.3459	102.211	86.1824	0.843184	0.823195
CADLAD_118	0	1029.58	0.0976085	0.568449	0.392263	0.834115	0.153484	271.616	1.26667	431.817	0.957625	521.044	0.724934	156.853	2.62431	2.813	292.157	2.1022	5.71198	233.805	0.443534	0.467994	109.058	0.652062	0.394367	0.634518	0.456497	0.155144	36.8464	1.30087	0.653108	0.34819	0.77167	57.3408	49.7243	5.14178	103.875	562.668	2.38304	0.962217	0.481542	104.075	0.810958	0.484549	145.332	156.557	138.494	0.884627	0.905486
CADLAD_119	0	1093.23	0.0767602	0.7375	0.227427	0.446847	0.0784838	280.534	0.943297	637.482	0.920245	472.4	0.780564	139.967	2.0398	3.14233	356.796	1.56994	8.84397	159.13	0.249041	0.248586	102.703	0.747817	0.518219	0.736186	0.2875	0.102368	45.4127	0.934498	0.550669	0.372657	0.637406	66.2604	56.1111	7.16226	103.127	527.482	3.07794	0.557758	0.18835	123.238	0.626385	0.351632	168.238	177.983	159.244	0.894718	0.870136
CADLAD_120	0	1023.81	0.157686	0.753469	0.0367463	0.0590682	0.0219438	597.963	1.18501	507.637	0.968883	430.726	0.491548	132.955	0.0282619	0.0758698	121.575	0.0430722	3.43497	145.938	0.279563	0.257129	85.695	0.949792	0.942071	0.957345	0.512608	0.211997	29.1461	1.35909	0.679501	0.454992	0.720917	42.7574	36.24	8.1976	72.8142	574.471	0.640133	0.846121	0.394784	109.836	0.951059	0.506559	111.795	118.789	106.297	0.894837	0.878046
CADLAD_121	0	1097.4	0.140194	0.803931	0.202198	0.31772	0.0891429	448.716	1.47308	456.28	0.954125	499.021	0.51013	170.42	0.145559	0.358065	197.604	0.25586	0.709511	174.071	0.44568	0.449921	98.9315	0.854508	0.683063	0.836819	0.416473	0.0649234	27.5195	0.777532	0.463942	0.241531	0.69658	55.4874	46.6305	6.8618	93.3493	568.453	1.89415	0.78815	0.458539	123.715	0.847582	0.581297	133.212	142.433	125.886	0.883822	0.811319
CADLAD_122	0	903.022	0.0637002	0.578937	0.11403	0.212115	0.0257723	301.154	1.32671	446.094	0.929547	564.606	0.424888	146.636	2.40326	2.02213	176.819	1.1488	8.2626	193.301	0.335707	0.333443	105.676	0.663166	0.440138	0.672766	0.249443	0.0396117	37.3957	1.00543	0.404368	0.299608	0.500715	65.2508	54.926	5.73438	108.677	493.318	2.5523	0.686261	0.496195	109.59	0.701482	0.512546	104.11	131.299	92.5309	0.704732	0.679124
CADLAD_123	0	1123.74	0.0466824	0.387763	0.0509081	0.0904194	0.0247993	815.497	1.02713	416.533	0.93892	506.477	0.531823	118.758	0.713595	0.650339	149.183	0.356415	10.621	97.7932	0.158908	0.14383	115.573	0.445771	0.197936	0.413188	0.614416	0.31135	38.9479	0.262324	0.60187	0.285564	0.565137	77.6246	69.119	6.78387	100.305	515.762	2.74393	0.605218	0.252934	108.883	0.513641	0.240364	95.4891	126.404	76.1996	0.602825	0.575922
CADLAD_124	0	1007.84	0.046433	0.455741	0.0790572	0.11387	0.0263584	303.504	2.01756	608.873	0.891104	356.072	0.506952	106.76	0.0965788	0.126967	109.606	0.0653456	22.6067	166.064	0.347594	0.319192	96.2355	0.908302	0.802636	0.906051	0.363873	0.0821424	21.9081	2.14235	0.636722	0.709964	0.658006	36.077	25.3481	13.9282	43.4432	606.023	2.15878	0.694003	0.0880856	64.8973	0.778343	0.316376	74.373	81.7189	67.4963	0.825958	0.796962
CADLAD_125	0	1173.03	0.0752074	0.425031	0.144356	0.232867	0.0345398	528.38	1.44295	498.465	0.888748	406.622	0.511563	93.2551	0.10241	1.9265	53.9746	0.859621	9.9525	53.151	0.149579	0.0428105	112.809	0.527034	0.283219	0.515414	0.428498	0.131146	21.0168	1.59736	0.61876	0.371895	0.605967	40.5465	34.0526	11.3845	55.5406	573.41	0.564601	0.80047	0.154125	82.1604	0.821381	0.260311	51.6954	57.6269	43.2234	0.750056	0.636343
CADLAD_126	0	1119.86	0.0942584	0.431766	0.0819231	0.15899	0.0316513	560.59	2.374	468	0.91305	387.238	0.503576	71.1856	0.0589459	0.267234	116.101	0.0932036	25.1942	111.968	0.222234	0.195929	113.293	0.538368	0.274563	0.484813	0.364855	0.0343173	31.4889	1.14776	0.786173	0.259065	0.431679	27.6424	17.0043	10.3894	68.6151	593.44	2.19376	0.624599	0.463952	88.298	0.587287	0.149424	75.1748	85.2031	62.316	0.731381	0.665172
CADLAD_127	0	993.908	0.0957397	0.751812	0.162375	0.344019	0.065252	291.877	2.69948	640.809	0.974582	550.132	0.729617	118.743	1.11562	1.24432	101.269	0.656611	2.14016	106.174	0.236508	0.220625	83.9116	0.976752	0.946832	0.977966	0.797772	0.552496	35.762	1.33888	0.836918	0.703403	0.907426	54.3987	53.0845	8.7263	66.1151	564.438	0.515365	0.91684	0.745422	72.2319	0.946711	0.730958	44.2404	44.6395	43.4141	0.972549	0.974799
CADLAD_128	1	985.795	0.0963439	0.668469	0.0918125	0.165103	0.045104	325.579	1.2636	541.996	0.91322	538.067	0.635949	156.228	2.59172	1.856	197.101	1.43856	7.9169	266.855	0.502294	0.446404	84.177	0.952471	0.965393	0.966977	0.606067	0.129347	40.3837	1.76755	0.84122	0.856102	0.884542	82.9601	76.8112	3.8821	128.989	503.161	1.58663	0.968765	0.833821	173.024	0.933534	0.738961	188.176	195.375	184.086	0.94222	0.908922
CADLAD_129	0	642.157	0.225116	0.723331	0.4474	0.831344	0.222981	648.967	1.83393	596.028	0.937096	452.83	0.503418	123.44	0.0409942	0.635793	136.043	0.135485	1.17919	106.963	0.248138	0.279507	111.744	0.727049	0.561804	0.700447	0.43418	0.303262	20.2474	0.794125	0.604544	0.472674	0.532416	39.5436	35.7377	10.9799	67.2862	561.344	0.736218	0.56561	0.321263	77.122	0.726293	0.660103	56.7723	75.238	51.8212	0.688764	0.717098
CADLAD_130	0	1057.48	0.141054	0.811109	0.0658706	0.090819	0.0280715	306.709	3.50026	477.512	0.958145	465.51	0.0277936	135.735	0.062753	0.177672	142.51	0.0944254	0.727665	152.397	0.31854	0.312097	81.8756	0.939729	0.953455	0.982223	0.363876	0.079626	35.7967	1.21598	0.625021	0.3922	0.730231	98.1127	95.0065	5.63463	111.222	623.904	1.3618	0.923383	0.778206	137.025	0.93964	0.756615	155.319	162.761	151.966	0.933678	0.897817
CADLAD_131	0	1150.15	0.0686743	0.690267	0.0994349	0.202579	0.0475636	349.755	1.12653	502.328	0.862694	483.93	0.512059	135.737	2.43051	3.60893	291.825	2.00459	10.8567	112.101	0.196977	0.188953	114.738	0.539304	0.27118	0.505943	0.439592	0.0427851	31.4871	0.640751	0.380877	0.140481	0.46759	56.3256	52.7541	8.56583	68.9487	488.385	3.07	0.733629	0.37671	87.7479	0.655543	0.371747	69.1327	93.8212	63.8576	0.680631	0.666454
CADLAD_132	0	924.615	0.0589828	0.495866	0.0346236	0.0927636	0.00843181	403.855	0.904267	425.532	0.924053	548.324	0.593248	157.114	3.84145	2.31034	160.657	0.703516	13.859	144.462	0.250372	0.280175	124.221	0.45161	0.203131	0.445668	0.456393	0.2947	31.022	0.851335	0.446951	0.141825	0.418135	44.8007	36.689	7.88733	91.4774	527.764	4.79183	0.486875	0.128021	90.0779	0.402262	0.136717	68.6202	76.2097	61.0164	0.800639	0.798335
CADLAD_133	0	1047.82	0.0986269	0.627472	0.052541	0.0818616	0.0205912	415.289	1.45094	532.13	0.922034	493.576	0.367621	155.856	0.466744	1.03536	228.077	0.373336	5.75899	175.538	0.280125	0.274807	102.484	0.881039	0.721807	0.840851	0.491455	0.119616	32.3879	1.88178	0.763646	0.592864	0.690886	54.88	47.3918	6.80501	81.2624	551.68	2.8057	0.857598	0.343198	112.693	0.868662	0.523253	98.7421	103.812	91.6042	0.882404	0.87641
CADLAD_134	1	933.678	0.127912	0.671926	0.241264	0.327511	0.14291	407.698	1.41725	595.092	0.945666	438.141	0.832331	109.738	2.78677	1.71021	125.165	0.928119	5.83414	137.119	0.338538	0.323872	111.263	0.854286	0.785841	0.911637	0.848161	0.701906	30.8555	1.26958	0.796609	0.562359	0.886015	51.3463	48.8694	9.59673	56.8649	527.6	2.24609	0.858696	0.6768	52.7201	0.823091	0.765337	64.4637	68.114	61.8646	0.908251	0.877487
CADLAD_135	0	988.55	0.117559	0.615021	0.0975834	0.133806	0.0422575	264.345	1.17508	471.692	0.971159	441.641	0.64514	118.859	1.42387	1.16508	226.791	0.726775	7.84926	205.392	0.372246	0.379681	107.087	0.785952	0.635197	0.802327	0.566861	0.210173	28.221	0.748593	0.592808	0.216851	0.734576	56.7876	51.4587	7.0795	77.8101	494.787	2.80882	0.84552	0.444852	85.6089	0.785574	0.491547	93.4566	99.7528	84.731	0.849409	0.773998
CADLAD_136	0	1036.07	0.141705	0.763573	0.0777065	0.199336	0.0530256	617.026	2.64193	604.714	0.904797	234.524	0.651536	106.889	0.412636	0.377673	92.412	0.216533	3.59058	86.3989	0.273689	0.274596	109.203	0.636253	0.429277	0.639547	0.488402	0.131123	28.5373	1.53007	0.813036	0.376751	0.676528	41.9926	35.0855	8.25009	69.3882	530.974	2.16827	0.832612	0.533709	59.5577	0.81604	0.537394	73.6072	78.2634	70.0591	0.895171	0.845438
CADLAD_137	0	1142.01	0.0507929	0.438034	0.0422335	0.0938668	0.0150197	527.526	1.23781	503.254	0.954302	479.823	0.424782	147.027	0.838862	1.34899	117.954	0.852919	10.8868	195.198	0.314693	0.262838	113.566	0.67666	0.44453	0.668855	0.492931	0.0980867	23.6706	0.382424	0.565009	0.211554	0.508666	32.4581	19.7003	10.0013	63.8061	542.541	3.21638	0.590058	0.185571	66.6402	0.678583	0.368189	61.5689	80.0649	52.2059	0.652045	0.581078
CADLAD_138	0	941.771	0.131799	0.523763	0.224162	0.297305	0.0841934	334.88	1.86046	528.962	0.881924	493.51	0.368975	84.1691	0.355617	0.921217	86.7887	0.153257	4.88876	93.903	0.226567	0.241309	100.307	0.865124	0.794294	0.896167	0.462292	0.233185	32.0691	1.14504	0.544478	0.305898	0.56197	48.6183	38.3104	11.1343	55.5265	517.432	2.67035	0.7183	0.4683	62.3383	0.825541	0.513886	59.6013	61.3627	57.6542	0.939565	0.910065
CADLAD_139	0	1187.36	0.0797745	0.448028	0.166405	0.268393	0.065985	785.486	1.1757	439.09	0.908967	538.296	0.510267	135.066	2.25048	2.27902	212.177	0.88623	11.4346	103.156	0.177144	0.166447	107.378	0.688871	0.440305	0.656062	0.511693	0.11331	29.2378	1.47671	0.71676	0.487183	0.678111	45.1437	34.4016	7.41599	78.1087	524.111	4.26762	0.651454	0.209863	83.9529	0.67552	0.306816	78.5197	88.8343	65.3755	0.735926	0.724138
CADLAD_140	0	961.185	0.0794624	0.614525	0.124423	0.298969	0.0613351	376.178	1.15954	467.556	0.914998	459.88	0.647333	170.302	2.27923	2.07705	169.659	1.48632	10.2222	166.203	0.286753	0.2672	107.89	0.779474	0.594191	0.792958	0.543823	0.105365	33.7386	0.945838	0.608899	0.225425	0.684444	69.4461	62.5525	7.7386	75.2013	524.026	3.31892	0.731009	0.281519	96.7774	0.749718	0.31108	107.471	113.744	101.7	0.894114	0.91172
CADLAD_141	1	1175.05	0.111533	0.589374	0.146216	0.241685	0.0337686	259.815	1.10423	449.107	0.914156	564.719	0.631418	122.478	0.869929	1.2537	104.91	0.563211	10.927	169.873	0.324474	0.276514	102.565	0.801244	0.673949	0.845255	0.293088	0.0483666	30.7579	1.11708	0.373771	0.218928	0.51933	42.8337	34.1187	9.15975	66.6873	493.494	3.72138	0.614669	0.279819	108.021	0.498715	0.264383	84.7228	114.84	65.0541	0.566478	0.525811
CADLAD_142	0	848.774	0.133878	0.516438	0.103912	0.17301	0.0227927	525.402	1.26874	649.095	0.919031	523.254	0.4074	102.755	0.97476	0.664356	100.256	0.463888	10.1352	166.503	0.288264	0.286275	116.364	0.618724	0.374729	0.702665	0.659331	0.348379	24.4096	0.534567	0.623799	0.361697	0.676133	37.5472	32.4816	6.92421	78.5653	507.399	1.81112	0.838363	0.628546	66.6723	0.808576	0.508437	65.2447	76.8423	59.5699	0.775222	0.753776
CADLAD_143	1	1368.73	0.0692843	0.502447	0.126749	0.274631	0.0550533	348.616	1.16754	488.67	0.937515	533.98	0.442018	113.188	2.33608	2.95362	133.026	0.996523	17.7427	149.637	0.227301	0.205159	116.831	0.67795	0.492469	0.719461	0.445205	0.0622745	25.5787	0.805559	0.488971	0.22599	0.474787	55.3567	41.8777	10.1528	71.4216	504.641	3.20963	0.517589	0.411759	68.6246	0.454388	0.236185	52.6764	80.3292	37.8588	0.471296	0.498695
CADLAD_144	0	1239.89	0.0669075	0.568902	0.0601468	0.185321	0.020229	259.103	1.64285	467.475	0.860901	561.304	0.371242	155.854	1.83847	2.03249	171.82	0.948213	9.88503	184.313	0.355332	0.312505	119.548	0.490011	0.211227	0.427954	0.280263	0.0404589	32.4465	0.474718	0.398723	0.167655	0.379358	44.2074	35.7879	10.4245	63.0771	578.73	2.71218	0.76393	0.524816	93.8718	0.68725	0.337944	78.657	93.9025	76.1876	0.811348	0.770997
CADLAD_145	0	872.193	0.14734	0.624042	0.229749	0.376687	0.0679596	263.237	1.26364	562.689	0.834417	513.39	0.836226	159.82	0.992471	0.959236	115.214	0.414376	7.01735	96.7966	0.198095	0.196288	111.691	0.766814	0.595318	0.791198	0.32991	0.0484057	34.647	1.00558	0.408017	0.222283	0.547625	55.0411	38.1113	8.75117	86.5408	534.63	3.54558	0.549805	0.219463	84.0274	0.541504	0.279793	71.1611	98.1373	60.767	0.619204	0.599762
CADLAD_146	0	1009.55	0.121949	0.619686	0.20114	0.357495	0.13255	404.036	1.27542	451.159	0.833374	433.911	0.470918	98.3004	1.30652	0.193085	96.9437	0.0290925	18.2564	103.426	0.20604	0.231609	115.913	0.733237	0.522959	0.733473	0.4152	0.140219	42.3814	0.615281	0.644127	0.14203	0.515697	41.7458	38.8271	8.31981	79.9444	532.462	2.50583	0.696701	0.569598	93.6282	0.453342	0.16845	66.5987	93.9033	45.3396	0.482833	0.430383
CADLAD_147	0	1006.99	0.14505	0.67378	0.0421173	0.104304	0.0197475	442.755	2.93155	534.023	0.927643	595.44	0.583557	126.811	0.0811166	0.1633	172.04	0.0638321	1.9604	160.611	0.265926	0.232399	96.0806	0.850882	0.756459	0.893157	0.319935	0.04989	40.8762	1.279	0.605413	0.402375	0.722324	37.7508	30.2162	10.0929	75.458	618.563	0.930771	0.716594	0.558232	136.43	0.748058	0.340736	134.345	150.629	129.468	0.859519	0.817561
CADLAD_148	0	1041.5	0.0709233	0.4113	0.0365375	0.0961121	0.0113136	432.204	1.44138	456.777	0.968894	524.844	0.605147	145.047	1.18118	1.62097	224.978	1.13133	2.92996	105.824	0.218743	0.217492	109.258	0.593477	0.385404	0.635192	0.326514	0.0828949	34.6492	0.252422	0.570739	0.205351	0.693997	61.2869	50.0928	5.69284	110.298	544.963	2.80806	0.755951	0.431048	111.169	0.581481	0.314111	97.0704	126.799	82.443	0.650185	0.63576
CADLAD_149	0	916.265	0.254411	0.824699	0.718616	3.71784	0.277488	425.806	1.55561	659.66	0.851387	421.927	0.477535	135.598	1.24307	2.42487	178.485	1.69087	13.4044	175.966	0.348639	0.297011	105.82	0.656818	0.408878	0.633474	0.449752	0.234743	49.9151	1.64396	0.713313	0.569988	0.782815	62.2733	56.0038	7.74382	76.253	541.552	2.82934	0.824412	0.355447	79.4715	0.849439	0.534916	102.591	110.456	90.6405	0.820604	0.81164
CADLAD_150	0	971.264	0.0993516	0.647684	0.184244	0.732063	0.0857482	274.546	1.98074	502.524	0.960064	584.084	0.434164	140.325	2.33604	2.247	145.598	1.27418	11.3148	177.709	0.329947	0.326888	93.6314	0.973018	0.922499	0.966076	0.760225	0.289008	23.4405	0.861667	0.537145	0.312777	0.7208	57.1513	49.9713	6.85265	85.6934	626.853	1.93632	0.896329	0.600446	103.988	0.968795	0.807453	120.469	126.638	118.758	0.937773	0.918071
CADLAD_151	0	1063.18	0.0625393	0.573015	0.0285825	0.0393348	0.014468	599.239	0.968396	519.881	0.95243	522.64	0.584457	86.0363	1.78174	1.93352	140.358	1.15809	12.1566	123.522	0.196677	0.202355	96.3206	0.826782	0.705917	0.892177	0.329947	0.140168	33.6963	0.724311	0.519295	0.151915	0.41274	62.3571	44.6624	6.52437	113.791	503.246	3.14014	0.546159	0.257362	117.207	0.585493	0.243477	85.2594	134.077	73.0034	0.544488	0.58049
CADLAD_152	0	592.169	0.151362	0.609682	0.0373003	0.0463753	0.0228013	334.491	1.19782	431.401	0.939175	443.314	0.697462	176.336	2.3088	2.67389	244.889	1.83167	7.00783	120.599	0.251196	0.216078	112.981	0.476039	0.210247	0.420047	0.271841	0.0122548	37.7868	1.34658	0.455872	0.394815	0.567035	50.1555	40.4045	8.97941	85.1518	523.451	2.82972	0.547922	0.202136	94.6607	0.627513	0.273823	102.337	123.065	95.3799	0.775036	0.811453
CADLAD_153	0	1049.53	0.180678	0.597111	0.198498	0.653456	0.0558554	727.901	1.99528	577.524	0.929216	438.029	0.568219	112.172	0.434239	0.582337	169.64	0.231478	0.500963	171.238	0.391586	0.387937	88.3442	0.96279	0.916293	0.9507	0.864437	0.382	26.6805	1.36849	0.927468	0.63074	0.903074	49.5491	46.1494	7.81651	66.1788	521.857	1.58458	0.911111	0.8935	79.9872	0.915495	0.715769	93.6406	98.2938	89.3341	0.908848	0.870636
CADLAD_154	1	846.401	0.156754	0.787228	0.0809436	0.14302	0.0410371	285.735	1.7121	584.502	0.922566	582.816	0.71118	152.382	2.79376	2.60635	213.808	2.25641	7.40132	191.826	0.349237	0.357219	86.622	0.9704	0.933966	0.971544	0.739748	0.298059	49.391	1.75244	0.824821	0.787478	0.889067	90.4228	86.7978	4.82682	120.591	556.485	1.6302	0.898071	0.710257	129.646	0.93749	0.692841	144.616	146.178	133.449	0.912922	0.943823
CADLAD_155	0	1034.88	0.0732035	0.706454	0.165607	0.269814	0.0815671	330.38	1.08508	462.195	0.961661	481.254	0.719571	209.366	2.75531	2.83091	268.853	2.28546	7.07135	175.415	0.344802	0.348865	101.135	0.735169	0.469846	0.722352	0.265526	0.1939	39.8555	0.945185	0.447922	0.232143	0.775811	83.4258	75.105	4.55408	122.672	512.929	2.32043	0.748064	0.485663	129.891	0.76481	0.584646	129.724	146.028	119.922	0.821228	0.87805
CADLAD_156	0	831.255	0.0903858	0.720623	0.479573	0.81906	0.228047	499.095	0.952568	492.62	0.945871	530.679	0.790041	185.423	1.93582	2.23209	200.758	1.79121	5.54065	256.456	0.465494	0.411254	98.093	0.769209	0.595339	0.762026	0.535186	0.234387	34.1416	1.21651	0.639491	0.300791	0.713997	89.1443	83.1839	5.13161	101.515	517.062	1.83924	0.885751	0.666384	125.115	0.830088	0.65922	132.004	137.758	118.44	0.859771	0.847842
CADLAD_157	1	958.303	0.105719	0.650181	0.0713153	0.12315	0.0356097	315.738	2.0063	564.888	0.911357	583.606	0.412184	138.925	0.266204	1.36269	177.465	0.347618	1.09389	101.83	0.249639	0.229997	100.282	0.814463	0.700782	0.860341	0.567732	0.218962	25.5557	0.346276	0.448578	0.0791677	0.479095	33.937	22.9206	11.8991	55.9394	574.535	1.14565	0.624015	0.166779	62.8768	0.757504	0.308273	54.7243	59.6959	49.9465	0.836682	0.867762
CADLAD_158	0	1224.96	0.0675852	0.55052	0.0856949	0.12778	0.025256	465.047	2.10616	502.488	0.749375	428.746	0.622491	80.0685	0.0623378	1.50809	105.685	0.837953	16.8411	107.434	0.204748	0.199379	118.825	0.709357	0.494042	0.705745	0.340088	0.0334948	24.1896	1.8654	0.699078	0.58994	0.412772	33.281	22.6967	14.7559	55.9246	581.234	0.988381	0.564167	0.23978	51.6236	0.66982	0.282814	54.6441	81.3943	36.2194	0.444987	0.389767
CADLAD_159	0	1165.31	0.0526364	0.47505	0.076763	0.155242	0.0347379	307.989	1.30919	559.285	0.972525	474.063	0.637979	114.928	1.51081	2.82337	137.394	0.370618	11.0245	156.905	0.255285	0.223582	113.536	0.550918	0.272353	0.478749	0.400192	0.0527768	30.6904	1.2478	0.544911	0.324572	0.641157	41.7268	32.0624	7.99012	71.0033	520.48	3.99771	0.675297	0.324816	79.3231	0.782374	0.337839	71.2864	88.9536	60.6418	0.681724	0.715859
CADLAD_160	0	945.202	0.0905221	0.683742	0.105022	0.247967	0.0601247	341.607	1.94912	445.143	0.910602	563.859	0.570105	230.471	2.10925	3.39467	297.329	2.12966	10.6981	134.918	0.194688	0.173404	98.4201	0.787585	0.603743	0.798754	0.391104	0.0705369	40.7978	0.561866	0.421794	0.152729	0.606845	71.0338	65.7931	8.9785	76.3459	586.526	1.40725	0.727122	0.207506	125.53	0.919267	0.604819	163.439	194.185	158.966	0.818631	0.85621
CADLAD_161	1	956.034	0.0925291	0.707085	0.0988244	0.216021	0.0398245	314.291	2.61642	632.342	0.707526	427.27	0.717074	116.695	1.84031	2.20635	98.5133	1.26399	7.62846	54.459	0.153388	0.0520386	106.704	0.738448	0.538469	0.771299	0.379971	0.12764	32.1957	0.721459	0.4587	0.185386	0.574825	51.3343	44.6194	11.766	65.2136	607.938	1.50807	0.631397	0.276232	73.8794	0.692252	0.572851	55.4442	74.614	43.5415	0.583556	0.587711
CADLAD_162	0	1045.09	0.0580676	0.417439	0.0464751	0.0829517	0.0381839	356.928	1.36532	592.895	0.902853	544.702	0.522906	146.672	2.02996	0.214903	84.3139	0.100662	2.5157	91.1322	0.185095	0.140787	95.9343	0.934437	0.902262	0.948694	0.52939	0.147452	20.0119	1.60606	0.669697	0.398599	0.677296	31.2457	25.9533	13.1822	43.3521	526.416	3.31749	0.786524	0.333683	72.514	0.804885	0.380334	99.5359	105.69	83.524	0.790272	0.856229
CADLAD_163	0	924.646	0.0852201	0.56695	0.245096	0.704824	0.138547	326.055	1.55037	515.938	0.878813	416.301	0.451705	79.5572	0.0412457	0.189703	111.003	0.0701442	7.4109	39.4249	0.108206	0.0177578	113.275	0.681803	0.429642	0.642483	0.464458	0.224736	25.3782	0.173214	0.394476	0.0316275	0.432869	43.903	30.2805	10.5827	75.4471	543.459	1.00521	0.466648	0.0954265	80.7288	0.514861	0.113305	62.1144	95.2396	44.3408	0.465572	0.448669
CADLAD_164	0	1015.2	0.0743785	0.533361	0.0777095	0.128346	0.0633291	797.635	1.48538	491.48	0.970364	496.546	0.663119	144.024	2.48919	1.34726	180.636	0.833085	1.6147	153.999	0.293689	0.287118	106.591	0.762978	0.62667	0.811763	0.416728	0.209444	30.8528	0.659099	0.504283	0.21412	0.652758	48.2743	40.5232	6.38584	91.1816	582.647	2.2993	0.851965	0.503197	119.673	0.799009	0.484164	108.128	126.233	96.5655	0.764978	0.760291
CADLAD_165	0	535.128	0.248514	0.714801	0.366768	0.859215	0.224444	420.118	1.09551	427.116	0.960233	418.996	0.858436	136.324	2.18199	1.30873	207.574	0.894702	8.66355	193.326	0.397512	0.391504	102.898	0.72245	0.518024	0.737988	0.674922	0.25626	38.2428	2.1573	0.790885	0.820584	0.873925	53.5151	49.4803	7.50867	73.2475	524.99	2.70726	0.882597	0.524241	103.18	0.822959	0.715705	122.507	138.608	109.558	0.790415	0.809871
CADLAD_166	0	847.924	0.244287	0.851896	0.297398	0.485249	0.205437	403.948	1.69962	503.604	0.956102	549.621	0.794106	269.545	3.00533	2.61464	275.289	2.24882	4.91903	318.271	0.664193	0.658849	84.9099	0.932255	0.914061	0.957972	0.756203	0.360141	59.3348	1.24185	0.884091	0.73016	0.915397	106.695	104.945	2.64446	188.771	495.43	1.48064	0.966398	0.800086	221.801	0.911466	0.88609	261.369	262.87	250.104	0.951438	0.927479
CADLAD_167	0	1099.29	0.0601643	0.561234	0.226533	0.473423	0.0697778	388.262	1.88768	531.794	0.951459	465.159	0.6333	82.1822	1.31992	1.29111	111.011	0.781833	19.7472	83.6166	0.174136	0.166655	110.633	0.726372	0.59991	0.81609	0.318634	0.119373	38.9016	2.26988	0.52491	0.517207	0.771453	42.5763	31.6901	8.24767	81.4949	601.051	2.12371	0.696707	0.60235	89.6926	0.48839	0.0587522	75.9631	120.426	56.3235	0.467702	0.393134
CADLAD_168	0	1600	0.210009	0.547644	0.231536	0.423111	0.174201	455.441	2.44937	463.956	0.93721	438.552	0.623172	107.462	2.36865	0.722479	87.7419	0.515393	15.3527	49.2123	0.0932075	0.0983808	115.584	0.597002	0.356881	0.58222	0.730195	0.126699	28.8722	0.4183	0.564717	0.217723	0.702067	42.3378	35.0368	14.3372	44.3935	592.422	1.73861	0.702985	0.250998	66.5545	0.757106	0.534914	62.9519	74.2363	55.6396	0.749494	0.754737
CADLAD_169	0	672.703	0.162788	0.689918	0.0975771	0.155486	0.0397126	311.411	2.00406	519.262	0.97201	503.158	0.720974	171.049	1.15617	2.37491	240.612	1.39099	6.5804	246.685	0.481961	0.488134	89.8908	0.871021	0.79144	0.899166	0.579748	0.0597769	32.8855	1.10665	0.653743	0.286793	0.860906	75.7677	73.5358	4.66645	107.341	528.771	1.97828	0.903952	0.674506	129.038	0.87184	0.562621	147.517	152.075	141.102	0.927845	0.910334
CADLAD_170	0	1292.27	0.0725095	0.600324	0.341436	0.684985	0.167937	494.142	2.38847	463.765	0.867843	439.249	0.432759	62.3039	0.0328342	0.134717	99.415	0.0269022	14.7427	47.9834	0.137846	0.0503056	99.4313	0.941161	0.902907	0.948148	0.565919	0.174234	27.2173	1.11418	0.532195	0.285017	0.751863	35.3802	30.7291	13.4089	46.2652	589.089	0.730141	0.751644	0.341207	53.8111	0.76485	0.332603	62.1915	65.5427	59.2621	0.904176	0.858285
CADLAD_171	0	996.023	0.149785	0.697292	0.215344	0.935794	0.0983251	287.559	2.31477	432.623	0.965701	540.284	0.660651	65.1708	0.449325	2.957	120.493	0.957244	17.4823	121.248	0.224192	0.211178	91.4592	0.915535	0.843919	0.909803	0.448	0.141253	34.5322	1.64853	0.470639	0.492649	0.57466	35.7926	31.5782	11.7174	65.1353	617.101	3.32934	0.58182	0.335187	90.8213	0.631403	0.132926	61.2921	85.5124	50.5112	0.590689	0.605643
CADLAD_172	0	1090.84	0.0827166	0.717335	0.183167	0.235903	0.0829086	320.572	1.25171	455.18	0.900727	504.801	0.58146	107.552	1.99123	0.990583	125.904	0.465879	9.71647	172.833	0.303492	0.336071	114.266	0.67051	0.466764	0.667856	0.278334	0.126407	46.4937	2.05341	0.657011	0.733253	0.539852	73.2762	68.0947	7.49607	84.0379	487.043	2.95262	0.588342	0.348846	108.896	0.611099	0.4885	93.479	121.942	68.1567	0.558928	0.530732
CADLAD_173	0	1061.78	0.0601909	0.482066	0.0145696	0.0404667	0.00727585	315.747	1.07031	533.809	0.967876	806.469	0.431703	223.722	2.25086	1.39345	247.827	1.03003	7.62643	195.463	0.310779	0.286546	87.6925	0.908451	0.874653	0.946813	0.391674	0.122145	26.2852	1.73213	0.753827	0.508366	0.599473	50.6731	45.6725	6.83027	80.4647	565.522	2.37114	0.927111	0.57371	155.298	0.808453	0.549199	140.962	145.753	131.562	0.902632	0.894849
CADLAD_174	0	992.617	0.0646175	0.573616	0.0299214	0.0442731	0.010423	300.679	1.37398	622.458	0.95542	663.397	0.307236	154.91	1.96517	1.47738	211.427	1.04154	6.2424	232.19	0.411013	0.424515	116.293	0.554445	0.305338	0.54208	0.298013	0.0554036	34.7374	0.220076	0.293424	0.0527426	0.435267	60.5583	52.5526	6.65787	100.937	605.019	0.53908	0.739032	0.377166	110.64	0.825349	0.570761	91.1217	123.892	83.7628	0.676096	0.692689
CADLAD_175	0	506.122	0.0867624	0.564579	0.0906893	0.145423	0.0309702	300.958	0.957177	423.448	0.95783	516.264	0.363659	109.119	1.72092	2.07465	250.348	1.67658	9.84611	197.921	0.305585	0.296667	124.666	0.376299	0.116866	0.329556	0.557264	0.148952	33.6048	0.897704	0.371235	0.209566	0.669488	52.1146	48.6651	9.00597	76.6584	544.822	4.0714	0.549061	0.247371	98.9572	0.486425	0.315554	86.6043	119.111	74.8522	0.628426	0.544667
CADLAD_176	1	1000.41	0.0203635	0.152841	0.657471	0.967074	0.405282	342.643	2.70412	526.93	0.957349	225.963	0.617286	83.5262	0.0658023	0.133141	79.5756	0.0548694	1.21628	84.9244	0.296076	0.29379	0	0.255695	0.0475012	0.156414	0.9083	0.542046	17.7649	0.224641	0.759627	0.395683	0.860919	43.4961	41.9917	10.109	59.209	572.14	0.525735	0.827718	0.755292	36.6746	0.900355	0.629341	42.0824	47.7261	36.5643	0.766127	0.75805
CADLAD_177	0	393.104	0.337679	0.631196	0.0476759	0.105275	0.0284228	303.447	1.03216	423.479	0.920187	468.891	0.667048	217.854	2.7712	2.78052	272.899	1.91618	7.73558	293.759	0.525628	0.475748	113.319	0.4669	0.213184	0.43626	0.447701	0.0376915	23.4748	1.3844	0.509881	0.39402	0.638048	43.4233	39.2125	7.46982	64.8128	463.15	2.39945	0.783235	0.625929	76.3274	0.813882	0.4302	86.5662	102.346	82.2862	0.804	0.845388
CADLAD_178	1	925.384	0.0633033	0.399162	0.0562039	0.150091	0.015976	294.75	1.09057	445.876	0.961846	592.787	0.751345	89.4245	0.879709	0.964509	131.878	0.461052	9.45912	165.071	0.243225	0.220671	98.9397	0.772944	0.620453	0.833493	0.492699	0.123439	27.7332	0.825681	0.557134	0.183974	0.609495	45.0553	34.7337	7.9752	65.9105	500.966	3.35076	0.790898	0.300159	95.7302	0.782318	0.471043	107.38	113.836	98.2173	0.8628	0.82214
CADLAD_179	0	723.689	0.0372937	0.402885	0.0853951	0.149606	0.0429232	599.655	1.91164	571.191	0.927558	476.977	0.0517419	79.4235	0.222447	0.271195	170.125	0.175374	3.22394	88.2776	0.175121	0.173543	120.124	0.464397	0.214304	0.444552	0.304715	0.0443418	31.3966	0.243256	0.263332	0.0401837	0.390604	37.6117	23.2739	12.4495	75.7969	632.857	1.59005	0.423289	0.210395	93.312	0.50917	0.308549	73.4065	105.034	52.2032	0.497013	0.518267
CADLAD_180	1	872.05	0.125255	0.564717	0.019216	0.0436638	0.00712512	845.13	2.83935	372.502	0.826045	263.312	0.614113	32.9338	1.7933	2.55931	36.3864	0.932795	11.2143	58.1603	0.170024	0.0566594	95.9283	0.9238	0.833463	0.922881	0.471801	0.0442887	16.1774	1.28057	0.741208	0.819007	0.907872	27.2772	25.3606	8.4218	56.4498	494.997	1.93282	0.813447	0.684379	67.1197	0.812895	0.767557	50.9182	57.5374	47.5299	0.826071	0.688408
CADLAD_181	0	1014.88	0.0765617	0.512829	0.10086	0.236479	0.0394729	259.258	1.43266	477.977	0.938273	573.709	0.729671	148.876	2.09283	1.74417	153.709	0.834073	9.5063	145.529	0.223444	0.194506	99.8797	0.905214	0.810415	0.934176	0.64475	0.0891902	25.5562	0.876976	0.566289	0.259886	0.675716	62.3561	55.1891	5.7357	91.693	514.003	2.13481	0.937354	0.704299	131.238	0.942936	0.765799	144.423	162.023	139.267	0.859551	0.856854
CADLAD_182	0	985.418	0.137443	0.700629	0.0879349	0.173759	0.0540198	514.436	2.49872	469.802	0.951896	303.606	0.592915	111.9	0.280041	1.89176	62.9774	1.29305	7.05459	89.3717	0.301357	0.202726	88.068	0.946318	0.912474	0.967119	0.61402	0.0796435	36.4424	0.745132	0.598167	0.242401	0.788978	48.7931	42.0802	8.16577	74.7014	584.697	1.64592	0.806655	0.642087	85.3179	0.799574	0.665954	79.7856	88.1612	78.9869	0.895937	0.949013
CADLAD_183	0	963.685	0.112538	0.651361	0.142659	0.238756	0.0740777	269.558	2.925	655.621	0.71208	409.833	0.615045	63.9472	0.966303	1.54621	128.067	1.26958	0.415189	155.909	0.349496	0.342021	99.5987	0.775015	0.601195	0.775732	0.244197	0.121944	34.8456	0.57822	0.370895	0.104744	0.518172	50.1753	36.8349	9.68931	68.8565	568.573	3.00051	0.555941	0.360184	90.065	0.690488	0.545024	74.0169	89.2189	63.9763	0.717071	0.687149
CADLAD_184	0	897.42	0.0869635	0.410249	0.0833798	0.169937	0.029286	338.861	1.21241	425.082	0.861212	492.587	0.632107	100.143	1.87161	2.93867	255.589	1.28252	6.78187	129.809	0.20808	0.262328	123.497	0.368353	0.109371	0.290155	0.541087	0.102508	25.703	0.689346	0.421963	0.114947	0.624529	39.6651	32.4564	9.44097	52.7834	508.418	3.61779	0.69422	0.44067	67.4166	0.55158	0.25048	59.2228	74.4079	42.8238	0.575528	0.61642
CADLAD_185	0	763.621	0.101819	0.564166	0.102793	0.167408	0.0633571	356.767	2.08656	630.92	0.936773	484.835	0.588379	78.1464	0.125212	0.14014	135.479	0.0740791	8.98979	108.764	0.218644	0.208419	94.6558	0.755911	0.529205	0.701892	0.480497	0.245574	31.7743	0.47514	0.387407	0.174884	0.544859	61.201	59.9277	9.15906	72.4943	549.686	1.96798	0.734102	0.70178	85.3377	0.678665	0.178493	91.0304	104.993	78.5746	0.748376	0.729417
CADLAD_186	0	1037.38	0.147103	0.737425	0.227465	0.500176	0.165335	268.581	1.73829	527.347	0.963995	507.406	0.648604	139.074	1.40766	1.84486	193.599	0.934958	6.81169	203.272	0.338134	0.353821	94.152	0.841614	0.739583	0.864057	0.444502	0.130116	34.8581	0.836158	0.516819	0.24553	0.72274	81.9101	72.2725	6.23184	92.2365	508.962	1.62412	0.862957	0.852027	105.05	0.818747	0.508614	142.661	151.526	131.905	0.870511	0.865945
CADLAD_187	1	1029.28	0.0668607	0.603367	0.0912359	0.174058	0.0324268	569.304	2.00122	538.255	0.952026	340.915	0.711462	83.1608	1.76536	1.73843	59.124	0.967613	10.7428	49.0937	0.375232	0.398506	98.5596	0.889451	0.82563	0.92459	0.464361	0.0773231	23.6474	0.568662	0.525091	0.171327	0.550011	26.7484	22.7073	15.9384	41.9933	515.429	2.58534	0.642536	0.353141	35.8879	0.644172	0.421793	30.9552	35.6173	27.9799	0.785571	0.761429
CADLAD_188	1	1059.29	0.134797	0.790347	0.785793	1.59383	0.44885	351.565	2.01271	488.605	0.87808	538.967	0.697985	133.403	2.6212	3.34598	212.18	1.2242	8.1049	142.803	0.286667	0.270103	103.608	0.611481	0.365451	0.610762	0.764772	0.266614	32.5707	1.70834	0.544885	0.519154	0.807653	70.6916	68.5704	5.8266	109.74	562.373	1.88528	0.830328	0.459747	127.902	0.893476	0.611303	115.34	116.836	110.293	0.944	0.937513
CADLAD_189	0	876.767	0.05596	0.393081	0.0351909	0.0677411	0.0184789	754.396	1.15266	422.782	0.96026	585.786	0.564032	135.615	1.17043	2.06275	122.015	0.982513	12.842	141.029	0.217861	0.218126	99.3261	0.6601	0.468948	0.706655	0.33373	0.05444	30.5756	0.39361	0.335429	0.101832	0.502597	63.3147	53.0143	5.83105	116.51	512.618	2.59107	0.638879	0.345585	130.896	0.573707	0.278918	125.207	159.521	113.117	0.709099	0.712171
CADLAD_190	0	947.002	0.0955725	0.572847	0.105715	0.184152	0.0290627	393.355	2.8996	616.101	0.823029	425.559	0.698704	82.3083	0.139906	0.444954	100.136	0.197001	6.6637	154.762	0.333102	0.341571	96.5082	0.915132	0.81722	0.90165	0.319371	0.104382	33.2755	0.573619	0.408735	0.1662	0.70726	49.0435	46.1903	9.92864	67.8729	572.948	0.302268	0.704336	0.43296	66.2811	0.751072	0.513267	44.8592	48.3532	35.1855	0.727677	0.681318
CADLAD_191	0	659.747	0.093437	0.437784	0.0249892	0.0648365	0.016929	434.586	0.932688	459.085	0.927386	340.309	0.554922	174.653	0.172353	0.309364	174.326	0.14673	0.685382	164.36	0.488104	0.495633	104.11	0.922981	0.860401	0.91049	0.396249	0.130433	28.9678	1.30849	0.714113	0.63119	0.536647	51.5248	40.334	6.25073	100.442	545.133	3.08447	0.747623	0.310765	132.315	0.894109	0.47851	151.137	154.5	147.325	0.953559	0.941694
CADLAD_192	0	982.758	0.10519	0.770497	0.0281702	0.108686	0.0202305	291.99	2.76413	567.467	0.976007	441.992	0.579966	114.048	0.0861494	0.248785	162.632	0.0912416	0.574842	141.044	0.493235	0.485982	104.004	0.7753	0.612417	0.8129	0.275205	0.030166	30.1545	0.589603	0.489704	0.175841	0.657065	45.2174	41.8423	8.93731	62.3841	573.581	0.344903	0.958387	0.664524	73.775	0.929173	0.64107	88.9219	97.2956	78.8425	0.81034	0.83488
CADLAD_193	1	916.865	0.0825082	0.642265	0.0272727	0.0590824	0.0185059	276.808	2.00387	557.473	0.917583	456.883	0.012009	80.703	0.0552433	0.0560254	167.132	0.0320521	0.934899	96.71	0.186595	0.194267	114.663	0.508041	0.265574	0.523137	0.514918	0.139762	34.1477	1.71106	0.720398	0.703347	0.660508	39.4753	32.9008	13.3823	47.0134	589.775	1.3047	0.722143	0.131034	60.5633	0.563872	0.153622	61.6678	72.9832	45.6661	0.625707	0.535589
CADLAD_194	0	823.479	0.0956371	0.588127	0.0558668	0.0737051	0.0373695	393.381	1.45766	607.487	0.927932	451.494	0.694033	181.015	2.38205	2.79474	188.757	1.52051	6.70496	180.492	0.327682	0.313778	88.2002	0.954488	0.951482	0.966541	0.470482	0.122873	32.4211	0.694417	0.500229	0.181828	0.588954	65.0065	57.3114	4.79129	122.77	525.375	2.05531	0.852493	0.77643	111.195	0.7778	0.434802	122.763	144.029	112.843	0.783471	0.791995
CADLAD_195	0	975.688	0.0557206	0.551932	0.0367675	0.0868428	0.0105846	687.427	1.31362	619.174	0.910539	692.201	0.385097	195.433	2.47391	2.15023	188.523	1.77345	7.467	180.889	0.301407	0.264999	111.14	0.574673	0.295924	0.519041	0.553331	0.166524	26.1472	0.409706	0.375173	0.0760354	0.515526	47.4822	31.1561	7.43819	95.9546	631.214	4.43586	0.723435	0.231468	86.2823	0.858585	0.638981	117.29	120.92	112.906	0.933721	0.944942
CADLAD_196	0	1005.34	0.0907625	0.530736	0.0609199	0.116618	0.0295593	321.954	1.15916	444.265	0.95115	538.997	0.506501	127.496	1.02669	1.82305	251.917	1.06875	7.12599	233.639	0.374104	0.343535	109.148	0.680195	0.441049	0.652492	0.529934	0.18292	35.3549	1.29984	0.652219	0.383881	0.7236	75.8835	70.4875	4.10189	133.072	527.529	1.83192	0.925861	0.664456	128.003	0.911764	0.575504	128.112	139.522	122.526	0.878183	0.846344
CADLAD_197	0	898.403	0.0409316	0.397401	0.126319	0.279369	0.0621794	321.927	0.843743	415.306	0.981128	535.155	0.519829	197.624	2.07824	0.107925	155.351	0.0553992	6.48569	161.941	0.32093	0.34316	102.156	0.940719	0.871578	0.913597	0.502292	0.408285	29.7284	0.511823	0.388299	0.16714	0.425109	47.039	33.6735	7.7354	94.6256	465.536	3.45168	0.443459	0.130548	116.826	0.571406	0.354374	90.0401	107.262	85.8484	0.800365	0.781221
CADLAD_198	0	835.159	0.187748	0.765719	0.231093	0.321129	0.16848	472.554	0.955966	418.689	0.957054	459.011	0.882291	141.996	1.3421	1.09223	144.21	0.562292	7.16277	190.74	0.311675	0.30187	91.5251	0.874436	0.819144	0.923299	0.442778	0.262238	28.5941	0.488415	0.36574	0.0920188	0.372572	54.9687	39.5983	7.11609	105.551	512.024	3.896	0.492846	0.166764	122.197	0.508451	0.261514	112.493	138.88	99.6877	0.717799	0.677646
CADLAD_199	0	1108.43	0.0604573	0.651896	0.0403039	0.0653088	0.0302839	328.464	1.36763	395.561	0.967223	620.675	0.754315	116.877	0.444106	0.753693	150.344	0.32187	9.90763	143.475	0.223654	0.220789	95.1283	0.924332	0.817652	0.903774	0.514929	0.149168	29.6056	1.0895	0.651508	0.308143	0.700842	41.512	33.5571	7.91913	71.5174	597.103	0.553109	0.907934	0.699241	50.7713	0.819731	0.741826	78.2309	85.6081	71.1111	0.830658	0.871029
CADLAD_200	0	907.719	0.110663	0.70631	0.475522	0.625454	0.113952	348.517	1.77327	424.318	0.885838	497.049	0.294027	78.8067	0.788942	2.98416	90.7453	0.621713	13.1681	160.25	0.249452	0.268459	112.075	0.464971	0.199402	0.407364	0.432684	0.092166	26.3322	1.00132	0.530222	0.172304	0.740273	34.5766	24.1765	12.3376	55.2015	568.383	3.76066	0.623601	0.338078	77.9183	0.48818	0.160196	71.5862	90.1188	50.984	0.565742	0.48986
CADLAD_201	0	800.821	0.0496641	0.435479	0.0877345	0.154462	0.0372833	294.951	1.18952	426.184	0.980494	594.771	0.437832	164.956	1.04353	0.229175	164.673	0.121329	1.81736	137.516	0.269868	0.285359	117.966	0.377161	0.092722	0.245746	0.521357	0.135583	25.5642	0.251453	0.46557	0.0505692	0.602144	39.5256	33.9569	11.1727	65.803	615.109	3.68948	0.6699	0.24744	76.0078	0.697866	0.272093	73.8314	97.6186	65.3628	0.669573	0.672169
CADLAD_202	0	1034.77	0.190785	0.801593	0.214555	0.560017	0.0863247	595.047	1.08287	436.344	0.94102	485.14	0.674621	129.374	1.61794	1.79973	198.141	0.885566	6.97289	226.488	0.426495	0.448045	83.5025	0.968996	0.962477	0.982191	0.641306	0.153383	40.9102	1.19205	0.76754	0.492077	0.920028	109.306	104.367	3.79087	140.287	520.564	2.11828	0.946999	0.716557	153.718	0.916514	0.724509	156.629	161.527	151.332	0.936889	0.935672
CADLAD_203	0	1135.94	0.0579276	0.461593	0.0975052	0.206411	0.0433024	829.169	1.04324	638.863	0.623829	239.686	0.572518	38.067	0.68225	1.65759	66.0566	0.817906	10.7053	62.783	0.182353	0.039563	116.63	0.490496	0.237478	0.469266	0.336207	0.0791489	22.5259	0.648598	0.760252	0.193367	0.650174	11.4744	9.69255	10.3629	47.6951	453.501	1.86875	0.646939	0.467057	41.5145	0.628326	0.335804	38.7954	47.4307	25.5342	0.538347	0.390707
CADLAD_204	0	939.512	0.0817082	0.526318	0.0306458	0.060903	0.022343	364.284	2.03927	597.101	0.941442	564.388	0.571376	104.09	2.41847	1.73622	164.966	0.995966	9.82694	67.7959	0.136335	0.0733482	109.14	0.529573	0.244949	0.465613	0.287564	0.0232356	35.4472	0.384054	0.297073	0.0743866	0.430853	60.9022	42.5217	9.32604	87.1385	610.969	1.41716	0.515636	0.255652	108.566	0.681016	0.399684	94.6104	124.334	80.8264	0.650077	0.665402
CADLAD_205	0	1022.62	0.158377	0.640983	0.4406	1.00938	0.105644	323.667	2.30555	534.656	0.921623	512.971	0.665513	144.054	2.45148	2.10207	207.762	0.887543	0.807051	191.968	0.395282	0.39297	94.964	0.928409	0.831431	0.937215	0.621936	0.32855	25.6772	0.91644	0.685229	0.307766	0.888785	66.1995	62.8774	5.811	95.636	562.193	1.17131	0.925284	0.744942	103.942	0.955428	0.831602	140.998	149.599	133.258	0.890767	0.869898
CADLAD_206	0	1116.47	0.139563	0.59234	0.00632292	0.00953264	0.00381706	390.334	8.73109	480.027	0.971128	225.857	0.420343	72.4913	0.94245	0.880033	126.598	0.478304	5.5049	46.4098	0.450017	0.214111	148.396	0.783022	0.647788	0.865605	0.630265	0.108066	18.1662	1.41287	0.539948	0.802975	0.659909	31.4635	28.0316	17.6753	30.172	552.518	1.71555	0.92207	0.645139	33.7599	0.85488	0.615483	44.7408	48.1624	41.7741	0.867361	0.864795
CADLAD_207	0	1012.26	0.0958046	0.707622	0.293565	3.00669	0.161921	607.977	1.57693	505.683	0.960371	412.915	0.661638	103.635	0.0942181	0.571292	145.338	0.0703179	14.4033	132.889	0.237712	0.216184	105.872	0.863138	0.761287	0.89371	0.394216	0.0846155	28.7585	1.16043	0.553837	0.296573	0.532504	47.2927	37.568	9.17024	76.2022	517.389	2.68905	0.617411	0.366885	92.2597	0.76191	0.429894	90.9955	111.207	85.5762	0.769519	0.711952
CADLAD_208	0	1015.73	0.0816155	0.59796	0.0913667	0.151658	0.0296575	556.692	1.74373	576.104	0.950136	513.544	0.0129558	191.59	0.0508006	0.307586	190.165	0.189857	0.784248	276.56	0.48313	0.491939	89.7967	0.944267	0.951109	0.964497	0.495068	0.183859	21.5328	0.456514	0.724605	0.232292	0.605648	43.8337	40.9626	7.52761	77.7497	560.214	2.04939	0.889154	0.428561	94.9154	0.889015	0.44568	122.157	129.091	119.365	0.924658	0.904099
CADLAD_209	0	951.977	0.0934475	0.718066	0.104923	0.155994	0.0428678	308.809	2.26464	614.173	0.94394	477.321	0.507684	86.0349	0.186074	1.1692	155.34	0.548181	1.69027	84.3497	0.158319	0.173354	97.8651	0.838838	0.721068	0.86979	0.35307	0.106155	40.721	0.8116	0.406601	0.250858	0.761056	55.1711	51.4991	9.47659	74.2394	603.838	1.92116	0.686738	0.142448	82.7665	0.886643	0.705562	102.651	107.992	99.1576	0.918191	0.915108
CADLAD_210	1	810.217	0.0774366	0.647394	0.217226	0.347691	0.0615141	542.065	1.83498	613.583	0.924877	542.778	0.283094	65.8263	0.661576	0.671088	149.177	0.426272	20.989	86.582	0.164622	0.20358	111.231	0.543343	0.250517	0.475698	0.354016	0.170573	30.2297	0.257171	0.37599	0.0985252	0.370775	45.5876	35.3022	8.29053	99.7984	615.179	3.44267	0.461784	0.368665	83.9409	0.478001	0.189894	68.3935	102.688	48.9303	0.476496	0.488904
CADLAD_211	0	890.454	0.0811193	0.490781	0.0618369	0.0963063	0.0199968	454.181	1.00814	506.703	0.95995	502.914	0.467686	128.013	2.63528	1.90622	258.681	1.36678	11.1553	193.87	0.318471	0.261016	121.685	0.395192	0.156391	0.380819	0.287451	0.0170372	31.8897	0.582359	0.415551	0.187889	0.584511	52.7878	33.43	7.15048	94.9101	500.175	5.25579	0.413024	0.105306	97.1401	0.401396	0.157029	76.1465	109.488	52.394	0.478539	0.481955
CADLAD_212	1	586.944	0.143352	0.606791	0.0515501	0.0952748	0.0231509	390.953	1.80779	536.281	0.944093	504.953	0.626146	128.312	1.62425	2.48076	232.527	1.93122	7.15741	209.432	0.343763	0.314015	102.687	0.756105	0.553541	0.766295	0.457428	0.202931	36.588	1.95076	0.785981	0.779529	0.65928	52.2849	46.4541	6.65723	86.2129	511.89	2.02973	0.797187	0.634032	96.7148	0.817198	0.704789	119.911	121.455	114.15	0.939849	0.937831
CADLAD_213	0	1055.76	0.113747	0.631798	0.0517522	0.101056	0.0274128	292.073	2.09087	552.351	0.974533	468.723	0.782864	211.089	0.190241	0.452976	235.803	0.374274	1.56745	133.993	0.271246	0.247641	91.558	0.853852	0.749914	0.89674	0.324183	0.0680091	50.0443	0.845993	0.668393	0.416282	0.76324	60.5644	50.8684	5.96618	106.253	577.278	0.246085	0.801352	0.610587	148.238	0.95492	0.661298	158.219	165.093	151.251	0.916153	0.929365
CADLAD_214	0	1057.82	0.157093	0.710025	0.245152	0.382355	0.0879559	285.976	1.4735	622.847	0.930981	507.676	0.377657	144.139	2.80281	2.93927	257.394	2.26752	9.88006	147.492	0.264383	0.245239	91.9101	0.942985	0.910957	0.96387	0.650761	0.275965	23.8583	1.60172	0.752063	0.491715	0.836061	47.2591	41.944	7.24697	77.7993	556.196	2.70984	0.807885	0.470726	63.6439	0.843029	0.493372	108.829	110.766	96.3621	0.869958	0.835409
CADLAD_215	0	999.433	0.1895	0.781793	0.1922	0.405295	0.049527	253.947	2.70007	619.397	0.955076	366.642	0.684076	47.4735	2.01029	0.267778	114.545	0.172345	5.2931	214.816	0.429913	0.390484	88.3596	0.892662	0.858388	0.938055	0.540788	0.135182	29.5465	0.831974	0.547004	0.24531	0.670253	48.4473	43.1705	8.98136	71.9743	579.664	1.73677	0.828499	0.679757	61.9117	0.87939	0.736243	67.2662	74.3323	61.192	0.823223	0.82238
CADLAD_216	0	1112.27	0.079126	0.63334	0.0644694	0.14878	0.0184938	332.722	1.66725	438.511	0.961849	517.233	0.674085	163.071	2.91052	1.33344	196.569	0.620187	8.27231	217.159	0.395679	0.363931	111.517	0.675313	0.469757	0.683133	0.440012	0.187417	29.144	1.30894	0.675368	0.353285	0.605069	81.9465	75.7375	6.2616	89.699	487.714	1.79143	0.849437	0.823083	112.001	0.700117	0.538892	107.086	127.057	94.2429	0.741735	0.813289
CADLAD_217	1	1073.84	0.0657447	0.610925	0.3704	1.65883	0.23328	337.181	1.02639	427.992	0.963586	506.134	0.54847	90.8011	1.4852	2.61032	165.882	1.40707	9.9696	178.083	0.285737	0.248926	112.462	0.429832	0.171482	0.397853	0.395611	0.187034	29.4574	0.629592	0.582948	0.358345	0.612021	47.9944	45.5228	7.96224	90.8002	500.72	3.02361	0.578313	0.350714	118.465	0.495958	0.282843	83.0953	112.316	70.2379	0.625358	0.568039
CADLAD_218	0	1001.89	0.149447	0.521916	0.164597	0.397551	0.0345987	363.254	1.35381	417.057	0.969781	730.836	0.368591	237.67	4.33089	2.44991	277.038	1.77569	6.19776	267.559	0.41054	0.370163	88.5852	0.912039	0.866089	0.949266	0.362073	0.130942	36.1756	1.53598	0.747087	0.535642	0.883807	72.9968	68.5111	6.51032	83.2726	517.102	2.50891	0.833052	0.498891	131.664	0.924681	0.764444	212.648	222.601	209.882	0.942863	0.925224
CADLAD_219	0	1113.78	0.0902129	0.537645	0.0895007	0.161606	0.013719	430.156	0.906075	454.837	0.982044	545.988	0.302052	248.233	2.87873	2.98313	323.212	2.64483	8.39864	223.798	0.393673	0.377007	109.017	0.650962	0.434215	0.648798	0.371315	0.104896	38.8437	1.81697	0.587305	0.714814	0.491406	53.4953	38.1988	6.03219	108.461	487.413	3.09548	0.564228	0.282745	109.271	0.616277	0.44441	104.197	121.502	94.7411	0.779752	0.781332
CADLAD_220	0	1218.67	0.0844691	0.593453	0.869848	2.47912	0.202951	554.564	1.56854	445.36	0.911562	475.386	0.685976	73.4018	1.73428	4.50458	128.714	0.909101	13.3695	119.021	0.186808	0.165371	117.925	0.526288	0.192033	0.360689	0.604798	0.154338	52.109	2.04231	0.625061	0.459065	0.502543	53.8222	37.0663	6.65637	98.0617	550.742	3.0598	0.690203	0.436098	117.278	0.579475	0.548774	92.1518	119.147	87.3154	0.732837	0.741757
CADLAD_221	0	860.415	0.10266	0.715758	0.144927	0.264185	0.0395598	498.928	0.987915	430.609	0.941887	639.566	0.655897	218.733	2.60613	3.66476	247.382	3.10681	6.58542	240.736	0.370727	0.358854	86.1457	0.882974	0.789119	0.869773	0.437603	0.186637	37.5135	1.16067	0.599703	0.271729	0.69878	61.3174	51.7992	6.7054	85.0847	508.732	2.8875	0.8104	0.493456	114.29	0.819314	0.494594	166.199	169.126	157.751	0.932742	0.928062
CADLAD_222	0	1159.73	0.0649167	0.567065	0.0392276	0.0690352	0.00992713	341.885	1.21134	430.794	0.839487	640.646	0.578254	247.808	1.07278	1.58934	289.471	0.464344	14.6169	222.347	0.346146	0.311779	103.622	0.801141	0.630182	0.800317	0.50786	0.227166	29.4289	0.463553	0.567831	0.2717	0.706807	56.9165	49.3043	5.25372	110.758	502.585	1.84739	0.802199	0.883909	86.0819	0.846487	0.434564	96.5701	104.329	85.32	0.817795	0.790031
CADLAD_223	0	1147.27	0.0433724	0.508959	0.0415833	0.079788	0.00876309	427.936	1.93085	456.477	0.962034	521.437	0.527363	113.842	1.54645	2.94531	106.217	0.539761	16.2813	127.271	0.186319	0.165201	113.112	0.546633	0.267179	0.487697	0.471372	0.0159531	25.9865	0.83138	0.531482	0.135125	0.471215	48.6433	35.2986	6.79536	90.6012	558.66	3.4515	0.746569	0.395545	79.11	0.729166	0.371862	81.7979	88.8704	69.2857	0.779626	0.738572
CADLAD_224	1	1029.43	0.10446	0.483383	0.100057	0.245261	0.0203827	360.618	2.13685	483.51	0.977643	524.26	0.585409	148.698	1.12917	0.0992738	131.363	0.0585889	1.70903	185.187	0.366491	0.348265	100.653	0.85309	0.731577	0.855242	0.363322	0.0911945	24.91	0.164707	0.352197	0.0339066	0.689142	47.7807	45.6419	7.53421	82.939	550.165	1.60445	0.813284	0.570401	75.3866	0.748763	0.305275	97.539	106.592	88.9964	0.834923	0.787666
CADLAD_225	0	872.732	0.204401	0.885149	0.407232	1.21398	0.166969	321.696	1.36579	473.07	0.939948	507.369	0.854903	196.422	2.21127	2.51244	216.912	1.39336	5.7367	285.053	0.541074	0.512761	88.5042	0.956169	0.92357	0.954978	0.638504	0.302703	76.373	1.34568	0.906908	0.817724	0.923789	144.672	140.296	3.09398	184.42	549.071	1.42099	0.926048	0.867686	203.228	0.921837	0.808838	216.759	224.124	201.787	0.900337	0.92321
CADLAD_226	0	1074.4	0.0804712	0.591123	0.0308273	0.0546784	0.015766	269.297	0.905762	418.764	0.829889	549.224	0.613469	64.5051	0.13534	1.79325	260.459	1.0324	8.58382	156.005	0.256688	0.24228	112.984	0.711746	0.485672	0.729696	0.672195	0.112669	35.4356	1.33359	0.773917	0.426574	0.58048	51.6293	44.4174	8.62857	60.5666	466.408	4.23416	0.64151	0.180918	71.5722	0.722066	0.283644	70.7189	78.2625	66.1642	0.845415	0.834686
CADLAD_227	0	1022.69	0.0895536	0.777779	0.395834	0.640615	0.17978	758.413	2.76135	609.985	0.938245	205.98	0.782871	56.0397	0.129776	0.43462	83.4254	0.212214	5.13501	93.6411	0.562134	0.1866	96.9144	0.869718	0.767471	0.884918	0.342183	0.378963	21.0971	0.130866	0.408831	0.0654627	0.461718	26.9432	19.7796	14.4584	48.0648	619.69	1.80841	0.632797	0.29918	26.2062	0.780536	0.691805	47.0441	52.5807	41.4765	0.788817	0.705442
CADLAD_228	0	1152.49	0.0516364	0.5805	0.0984084	0.179033	0.0213766	306.538	1.07856	422.705	0.88582	531.625	0.567367	125.963	4.28112	2.22944	171.209	0.928869	13.7949	176.381	0.3405	0.354278	107.377	0.847345	0.64183	0.799468	0.338154	0.100375	33.1109	0.660037	0.6046	0.250184	0.802193	50.4584	35.8084	7.29499	73.813	492.364	3.76314	0.725936	0.353968	88.7711	0.719011	0.351706	75.5364	78.3927	69.7114	0.889258	0.934259
CADLAD_229	0	967.159	0.137512	0.601885	0.307283	0.441957	0.168379	440.037	0.929704	424.724	0.936833	434.387	0.547618	109.3	1.66496	0.170188	105.331	0.11911	0.851793	123.797	0.298474	0.32195	108.47	0.691353	0.484163	0.723172	0.436082	0.239171	24.7169	0.386296	0.429505	0.0698808	0.564496	42.4877	34.7833	9.29059	63.4403	534.717	4.09269	0.706986	0.223129	79.8041	0.591922	0.182405	68.3932	76.7122	51.8405	0.675779	0.698153
CADLAD_230	0	1016.45	0.110502	0.609144	0.0232752	0.0338317	0.013824	614.668	1.5572	457.509	0.977146	505.127	0.565768	172.719	2.80187	0.564411	160.453	0.20123	0.391523	196.11	0.416122	0.397938	96.8236	0.82466	0.663821	0.814841	0.38391	0.138257	35.9933	1.0928	0.631058	0.317214	0.631282	72.0792	67.359	5.40472	116.641	579.686	0.605521	0.821439	0.416893	145.919	0.858254	0.646814	164.079	172.187	158.071	0.918018	0.834777
CADLAD_231	1	1078.75	0.178276	0.806015	2.09108	8.58786	0.441194	694.541	4.12268	309.158	0.825978	267.58	0.661754	105.106	0.804286	1.55042	65.698	0.488369	7.57565	79.4212	0.251486	0.116755	112.051	0.572965	0.315359	0.545069	0.573238	0.312414	18.1091	0.875077	0.729118	0.504966	0.528034	39.8013	34.5934	21.9007	41.4071	703.54	2.01694	0.583077	0.362019	68.8371	0.49518	0.540821	46.5332	46.9325	39.9838	0.851942	0.857908
CADLAD_232	0	858.627	0.320554	0.888846	0.110059	0.125164	0.0515745	314.308	1.64245	489.621	0.96966	443.455	0.871985	278.613	3.19423	2.73346	297.287	2.0447	5.19943	282.498	0.611013	0.612638	88.4095	0.919445	0.854676	0.909349	0.529129	0.216848	60.0243	1.17592	0.813433	0.568715	0.948229	179.454	175.253	2.54056	202.005	489.725	1.41275	0.967083	0.86551	258.173	0.935649	0.791466	288.674	298.73	286.444	0.958874	0.975308
CADLAD_233	0	909.342	0.153248	0.847286	0.178384	0.284321	0.114534	482.592	4.63368	460.482	0.941208	355.752	0.899674	122.999	1.70537	2.16989	123.881	0.943407	2.12771	108.851	0.349151	0.35302	110.569	0.492594	0.26362	0.545246	0.382399	0.191691	28.2263	1.01598	0.579159	0.496858	0.64103	44.0615	41.9538	23.2803	24.6494	546.726	1.87676	0.828099	0.746863	66.9574	0.958503	0.766088	76.8691	81.1885	73.2732	0.902507	0.851821
CADLAD_234	0	972.209	0.172698	0.800192	0.269088	0.355958	0.145475	526.657	1.6091	574.453	0.946001	509.543	0.806801	158.615	1.2853	1.57656	182.126	0.919035	7.52658	227.708	0.426997	0.423221	80.2551	0.94066	0.923332	0.984636	0.606721	0.233153	42.2552	1.37589	0.863981	0.577552	0.809205	51.6535	47.3669	4.82942	120.869	572.231	1.93026	0.898853	0.748921	127.929	0.817035	0.356067	142.38	151.472	135.381	0.89377	0.895039
CADLAD_235	0	995.931	0.184148	0.799467	0.586709	1.21617	0.301165	391.858	1.4577	511.376	0.872537	391.884	0.756826	105.394	1.85436	3.59177	127.281	1.40696	8.76144	193.288	0.3486	0.296933	103.087	0.796074	0.608874	0.755863	0.689718	0.560461	33.9816	1.75238	0.598629	0.564313	0.674392	63.2355	58.0431	5.31617	111.725	510.427	2.11555	0.803438	0.786077	93.9242	0.898408	0.606746	151.352	175.43	146.216	0.833473	0.892885
CADLAD_236	0	891.706	0.152357	0.706078	0.25188	0.403257	0.115258	270.124	1.64583	492.295	0.976955	536.376	0.7189	234.127	3.68419	1.06245	216.685	0.805264	1.10452	214.315	0.512561	0.53383	93.7768	0.8698	0.74978	0.866248	0.656592	0.262362	30.4208	1.62519	0.756259	0.62004	0.765514	67.2669	64.0456	6.72258	80.0885	518.894	2.24037	0.897326	0.614901	113.722	0.891412	0.755224	136.124	138.143	129.448	0.937052	0.917079
CADLAD_237	0	895.047	0.0597988	0.506466	0.0665524	0.203113	0.019441	573.696	1.77784	422.009	0.974267	431.224	0.490241	143.153	4.79605	2.7099	267.925	1.69284	8.06641	117.707	0.188926	0.188083	109.279	0.847263	0.743682	0.85185	0.674224	0.427403	26.3891	0.956091	0.722121	0.416254	0.746599	58.7141	51.4528	10.5424	54.0538	534.765	2.45163	0.843419	0.630221	70.6915	0.880594	0.790717	121.461	132.493	118.554	0.89479	0.878766
CADLAD_238	0	1118.43	0.228282	0.865079	0.821545	4.91922	0.164172	361.584	1.62804	502.265	0.858481	558.238	0.670222	246.936	2.26278	0.402955	234.287	0.0898664	0.70783	223.306	0.489711	0.475874	103.34	0.729308	0.510382	0.722431	0.521515	0.131526	52.5756	1.3427	0.82573	0.789242	0.930465	68.0143	66.5127	5.81846	92.6381	536.285	2.01421	0.932809	0.592098	120.95	0.928445	0.798628	152.287	156.371	148.437	0.949263	0.940346
CADLAD_239	0	1173.07	0.13863	0.651792	0.24629	0.405208	0.0756787	405.198	1.91605	526.72	0.917318	446.034	0.894479	94.1189	0.121757	0.239415	133.178	0.095523	17.8815	105.431	0.213629	0.192658	95.93	0.9288	0.895221	0.958314	0.440246	0.137057	21.4185	0.556684	0.644446	0.268451	0.80401	49.6885	40.4135	10.1556	55.6237	568.767	1.94562	0.859752	0.682918	75.4658	0.886001	0.521802	85.8554	92.0964	76.5295	0.830972	0.798766
CADLAD_240	1	903.047	0.196025	0.716388	0.71456	5.42946	0.038945	573.617	1.39915	435.395	0.635858	429.251	0.610915	160.204	1.49786	1.33367	210.9	0.0752626	7.15244	78.9064	0.214925	0.0720735	103.623	0.727106	0.556796	0.766483	0.47561	0.046771	47.809	1.60717	0.792509	0.69669	0.889534	63.2471	56.844	6.63077	82.3022	555.038	2.32871	0.901216	0.595885	90.6076	0.888412	0.652866	136.829	137.299	122.581	0.892801	0.90471
CADLAD_241	0	1077.49	0.066107	0.390811	0.0374435	0.104129	0.016606	365.198	1.15798	430.598	0.963736	589.576	0.313162	115.227	3.47268	2.44837	215.302	1.69255	10.8845	136.868	0.209706	0.176073	106.096	0.721422	0.51072	0.742976	0.346599	0.277401	31.1954	0.955028	0.572543	0.221805	0.404047	45.8242	38.9689	9.20092	74.0671	536.284	3.32947	0.570096	0.212781	74.207	0.637268	0.303968	65.9008	78.1543	55.7554	0.713401	0.680032
CADLAD_242	0	905.193	0.226622	0.832204	0.0965132	0.131635	0.0759584	376.259	1.21626	495.642	0.950601	456.652	0.889569	208.316	1.73515	2.32445	230.771	1.3616	5.45253	249.543	0.494553	0.500676	82.0818	0.924222	0.875572	0.957017	0.498297	0.415262	59.5474	0.907218	0.87351	0.60359	0.936604	138.064	135.699	3.4001	157.775	520.953	1.33912	0.941621	0.757854	184.58	0.906107	0.893595	214.699	220.877	211.679	0.958357	0.92972
CADLAD_243	0	1150.03	0.0671458	0.524827	0.00874302	0.0349936	0.00423328	314.33	1.33549	440.294	0.893517	539.178	0.60266	123.04	1.349	1.26136	192.965	0.677621	10.2323	181.911	0.351406	0.358532	92.3941	0.940292	0.855483	0.926068	0.366216	0.137945	37.8742	1.01763	0.412101	0.358478	0.719998	64.3598	58.9264	6.95276	91.4749	499.274	2.39914	0.681372	0.459895	128.918	0.705919	0.559271	111.269	137.108	98.5472	0.718755	0.699808
CADLAD_244	0	745	0.139889	0.631959	0.0463496	0.102539	0.0271198	623.052	2.95346	486.345	0.970252	247.994	0.833708	144.019	0.0439469	0.0515069	149.287	0.0387746	0.105962	153.35	0.646999	0.622309	79.4496	0.92696	0.910194	0.963096	0.716396	0.401449	28.9957	0.0940065	0.865045	0.726765	0.890253	77.3058	71.655	4.88473	112.738	528.298	0.326797	0.923975	0.497749	136.626	0.905523	0.779263	140.446	151.766	138.212	0.910695	0.964293
CADLAD_245	0	789.956	0.0653622	0.586335	0.0453885	0.0618254	0.0246019	333.536	2.04056	510.983	0.982192	454.609	0.445556	129.648	1.29003	3.21827	232.448	1.26652	7.68661	204.223	0.344112	0.329164	111.489	0.507439	0.218781	0.438741	0.408401	0.0203145	30.7836	0.960699	0.643005	0.275678	0.632394	55.3482	50.1544	9.84216	58.6867	547.964	3.2769	0.7734	0.338224	68.9137	0.789302	0.424585	88.719	95.9736	80.2466	0.836133	0.813603
CADLAD_246	0	1181.63	0.0393113	0.466297	0.0234956	0.0506134	0.0127712	830.168	2.12051	376.768	0.72751	475.157	0.0211287	44.0425	0.810584	0.621348	76.2235	0.467247	25.6081	77.9113	0.1501	0.133491	116.66	0.43387	0.184059	0.408769	0.314591	0.0401054	26.8794	1.07136	0.470494	0.269002	0.354416	28.3993	17.8869	20.7086	52.9989	686.275	2.57213	0.352663	0.272567	63.5968	0.375574	0.0617954	49.0962	76.51	33.6612	0.439957	0.282563
CADLAD_247	0	1192.26	0.0834821	0.381716	0.0299373	0.0587348	0.0199283	346.288	1.90442	439.53	0.846873	600.377	0.493938	107.975	0.535958	1.37629	128.275	0.627839	9.54968	90.2443	0.198977	0.149165	150.693	0.698227	0.462204	0.691857	0.323609	0.0478592	29.8938	1.41484	0.762991	0.309102	0.47725	43.0791	26.6281	11.6588	70.0595	596.353	3.30834	0.497671	0.376291	90.7988	0.430034	0.137972	52.0252	69.5586	37.8714	0.544453	0.492602
CADLAD_248	0	1029.48	0.094037	0.679112	0.0180976	0.0257566	0.0123934	355.178	1.94109	429.203	0.942453	556.183	0.632832	164.678	0.77431	0.774026	321.842	0.58264	6.4137	287.85	0.539635	0.531551	86.33	0.919455	0.854327	0.973338	0.659346	0.111595	32.0559	1.71377	0.666164	0.876172	0.876831	50.7112	45.7005	4.83133	109.392	513.359	1.60113	0.931701	0.814839	155.512	0.897585	0.700251	155.509	158.413	153.142	0.966725	0.92212
CADLAD_249	0	866.593	0.126905	0.628998	0.273857	0.600411	0.118887	455.192	1.53342	437.061	0.928355	546.498	0.528051	115.292	1.91587	1.50209	123.546	0.707944	10.488	153.513	0.238082	0.241015	100.304	0.790589	0.59625	0.780706	0.434462	0.105065	38.9193	0.960129	0.704788	0.279365	0.821282	68.6733	63.2666	3.84176	135.098	544.33	2.06552	0.95862	0.530631	173.722	0.888799	0.681418	135.552	142.535	126.721	0.889056	0.849164
CADLAD_250	0	918.591	0.0627174	0.643286	0.0512324	0.0725433	0.0242711	528.432	1.12763	477.475	0.974725	532.2	0.505894	187.309	1.93165	1.83798	259.231	1.63005	7.45312	244.166	0.504759	0.494744	106.802	0.667577	0.436446	0.67283	0.523319	0.191611	33.8215	0.590267	0.570584	0.227215	0.719271	68.9784	66.6965	6.18127	90.7048	516.901	2.52623	0.82174	0.551622	111.852	0.65024	0.517272	100.519	119.197	97.0102	0.813865	0.780948
CADLAD_251	0	1010.71	0.147214	0.796678	0.093171	0.216794	0.0437113	509.229	8.08401	526.999	0.925413	296.261	0.788107	78.6792	0.214636	0.489203	83.1745	0.379988	1.50505	119.913	0.414171	0.393786	84.0101	0.915286	0.887029	0.964016	0.59855	0.286488	28.8722	1.33101	0.685764	0.547027	0.863235	36.2397	34.8431	19.2083	30.8517	566.581	1.2423	0.89021	0.529098	35.8786	0.961368	0.748553	47.5201	48.6199	46.132	0.948831	0.923197
CADLAD_252	0	1257	0.055565	0.482745	0.0178916	0.0408304	0.00993318	313.259	1.63463	466.444	0.80508	551.96	0.373763	128.897	1.12931	2.77307	185.959	0.85873	10.0489	143.468	0.257271	0.21917	122.923	0.421186	0.135846	0.303193	0.397585	0.0111707	26.9584	0.669958	0.425194	0.123693	0.540126	38.5614	27.7347	13.5493	47.5136	540.897	3.61589	0.667759	0.334468	79.8187	0.79544	0.647599	43.4375	59.5168	29.0356	0.487855	0.457295
CADLAD_253	0	1070.41	0.0841784	0.703272	0.0312141	0.0742477	0.0203668	652.829	5.43305	587.021	0.970137	289.787	0.781355	85.6591	0.497884	2.00038	74.2663	0.873858	14.8004	2.89342	0.169975	0.170323	115.438	0.692412	0.441558	0.633141	0.601811	0.262665	22.9396	0.96704	0.60173	0.312094	0.583291	13.9739	12.1474	45.2535	22.9627	688.823	2.36783	0.465201	0.383141	26.5998	0.794179	0.281016	30.5848	33.3652	28.5298	0.855077	0.872237
CADLAD_254	0	1058.86	0.0766008	0.577109	0.0448437	0.123081	0.0197862	276.825	1.20359	426.062	0.948276	409.911	0.52205	91.1261	0.0858695	0.186757	98.5103	0.0754349	5.3435	138.157	0.286553	0.241481	99.9094	0.758815	0.620888	0.818577	0.295078	0.0284677	27.4238	1.3407	0.655252	0.518037	0.727559	42.4163	38.7236	11.6014	53.6889	544.511	0.865317	0.687647	0.193352	76.736	0.836157	0.521384	93.3919	104.344	86.8963	0.832789	0.788216
CADLAD_255	0	1204.05	0.0497859	0.340034	0.0194069	0.0475753	0.0077642	652.381	1.76755	602.487	0.837567	555.779	0.551757	175.904	0.863332	1.43908	293.987	0.419148	11.1527	69.335	0.134347	0.136535	116.013	0.66842	0.430551	0.641496	0.330426	0.0897048	25.6398	0.82159	0.71191	0.252561	0.601064	50.0278	47.1788	8.56186	67.712	558.775	2.42046	0.87677	0.542986	59.5568	0.732323	0.541178	62.5764	67.7448	52.6198	0.776736	0.816387
CADLAD_256	0	1059.39	0.11914	0.852236	0.231178	1.35815	0.10723	575.997	1.14792	432.229	0.889118	377.738	0.788789	82.3593	1.61825	3.20686	131.916	1.06412	7.35878	130.075	0.229065	0.220949	96.1326	0.892024	0.804884	0.934321	0.53441	0.502788	32.8051	1.23189	0.588648	0.436036	0.736734	62.403	57.2877	9.99102	51.6275	495.745	2.54346	0.680172	0.382454	81.9167	0.678106	0.617181	83.2545	102.807	79.2373	0.770742	0.749835
CADLAD_257	0	1102.65	0.0831955	0.533119	0.0489945	0.0763701	0.0146129	335.697	1.11958	437.677	0.939057	500.046	0.464934	104.953	1.27873	1.12259	162.738	0.654516	10.2055	196.367	0.410833	0.464611	101.408	0.80103	0.65613	0.841672	0.39871	0.18865	31.3965	1.2712	0.742387	0.382124	0.481885	57.2943	46.0977	6.4907	95.6316	502.949	2.70248	0.666934	0.482765	106.903	0.67236	0.477114	94.3672	110.749	84.4991	0.762981	0.729551
CADLAD_258	0	893.995	0.133639	0.751424	0.0323388	0.0791888	0.0156046	361.565	1.09634	481.786	0.936261	497.16	0.758849	133.022	2.44194	1.7118	163.141	1.07111	6.18277	205.497	0.362176	0.407313	103.472	0.774589	0.604723	0.812342	0.447835	0.0558662	26.6424	0.509484	0.525859	0.197696	0.858639	74.0358	70.1972	5.0194	101.883	496.21	1.78818	0.929227	0.881245	145.966	0.906913	0.737963	115.282	123.898	114.353	0.922958	0.892831
CADLAD_259	1	714.061	0.151282	0.851686	0.135754	0.256055	0.0648486	535.671	1.27188	447.976	0.978076	572.17	0.741582	226.933	2.70794	2.68432	284.239	1.99856	4.56739	304.321	0.6793	0.671828	87.7184	0.945044	0.897831	0.974366	0.451101	0.198025	46.6389	1.03112	0.736162	0.510405	0.825508	119.22	111.182	3.54037	149.309	499.002	1.56819	0.9117	0.841842	190.952	0.853267	0.67826	248.057	254.042	242.763	0.955603	0.955667
CADLAD_260	0	935.572	0.047764	0.677907	0.0796554	0.111552	0.0261115	400.313	0.900894	439.313	0.961527	462.506	0.480146	153.199	3.41762	1.12921	234.412	0.366319	12.5851	135.097	0.214986	0.218166	96.7725	0.688889	0.533633	0.777185	0.440512	0.135342	27.8147	0.63518	0.604654	0.189345	0.449703	44.614	28.9126	7.16502	94.594	487.071	4.07336	0.477494	0.140788	109.351	0.721565	0.404055	157.509	166.965	144.381	0.864737	0.80547
CADLAD_261	0	893.97	0.156889	0.833783	0.157157	0.265605	0.0396612	288.226	1.29608	436.028	0.943038	234.45	0.634624	83.5892	2.19971	2.36669	72.9044	1.36075	0.61904	101.455	0.402513	0.377385	89.2497	0.892931	0.818677	0.911205	0.505295	0.078435	38.9952	1.60235	0.815965	0.730095	0.861675	62.0711	56.6576	7.21675	77.1081	573.732	1.59213	0.921549	0.640444	35.5052	0.890249	0.828358	61.0019	61.4394	59.0417	0.960975	0.889814
CADLAD_262	0	921.568	0.0734653	0.732904	0.0789108	0.161765	0.0343051	315.309	1.84894	462.189	0.94305	480.348	0.0120798	122.204	0.294988	0.478445	97.9758	0.346525	3.45582	162.241	0.436947	0.410724	99.1378	0.768527	0.620338	0.811932	0.391611	0.0926157	31.575	0.780607	0.61258	0.251158	0.634968	47.4955	38.0021	7.49488	83.5363	556.476	1.91973	0.810172	0.439789	104.78	0.908429	0.781451	87.208	96.4481	81.8676	0.848825	0.910045
CADLAD_263	0	851.637	0.0737874	0.718624	0.0432807	0.079351	0.025243	595.625	1.75644	585.261	0.952881	454.798	0.968683	179.502	1.06159	0.0834614	171.703	0.0499247	0.76115	137.465	0.296752	0.286801	94.1612	0.865624	0.755727	0.89199	0.671676	0.234057	25.6132	1.24786	0.776039	0.465021	0.864635	39.0343	35.6303	9.86425	59.5701	533.423	1.86142	0.844958	0.635968	74.0487	0.865686	0.692562	92.8669	95.9435	88.2388	0.919695	0.899059
CADLAD_264	0	986.324	0.0695912	0.666286	0.0351967	0.0483305	0.0149763	374.61	1.05031	455.575	0.962528	553.669	0.776765	115.04	1.11529	1.53552	201.586	0.888781	7.61685	212.557	0.339267	0.334351	95.5665	0.813533	0.695105	0.890693	0.462029	0.222278	34.2829	0.365654	0.499406	0.198768	0.590978	80.0167	70.1886	3.83268	144.565	537.935	1.75388	0.90061	0.729465	140.593	0.766873	0.632441	144.927	157.981	140.956	0.892235	0.843561
CADLAD_265	0	686.84	0.168688	0.743856	0.314174	5.48427	0.0868609	438.994	26.2168	481.014	0.909463	3.2807	0.703652	2.00729	1.77955	2.70082	5.72139	1.19616	8.98143	2.90878	0.333895	0.328227	117.232	0.418205	0.165669	0.384711	0.672963	0.213738	8.34498	1.12432	0.464242	0.384728	0.742304	2.35619	2.11999	161.462	3.89514	504.68	2.20422	0.668256	0.493719	2.82189	0.886661	0.658888	3.22013	3.85296	2.7018	0.701226	0.70532
CADLAD_266	1	1065.84	0.17112	0.78678	0.30131	3.04538	0.13276	288.969	1.94543	588.126	0.841277	410.718	0.735277	133.27	1.16619	2.81597	123.928	0.844214	8.36057	178.308	0.440066	0.397136	110.393	0.675228	0.518692	0.748508	0.635858	0.406372	27.9859	1.49356	0.742965	0.601954	0.838764	44.016	40.1169	11.4134	51.6868	572.248	2.4674	0.826727	0.762769	78.725	0.804021	0.675209	68.467	74.7592	66.2751	0.886515	0.882258
CADLAD_267	0	861.18	0.0694743	0.631813	0.293709	0.468949	0.130395	312.983	1.14233	430.627	0.897072	482.594	0.585884	99.6325	2.61306	2.81058	125.63	1.61897	9.28739	132.477	0.212746	0.215708	122.197	0.453475	0.125766	0.288489	0.489432	0.182405	33.1341	2.48205	0.668216	0.871679	0.535973	35.3054	26.9345	11.4253	61.9846	544.12	2.39601	0.626581	0.544446	67.2897	0.497854	0.306317	58.2545	79.0521	48.9776	0.619561	0.597452
CADLAD_268	0	1122.24	0.0621096	0.513387	0.0674388	0.0880253	0.0318883	336.112	1.04055	415.412	0.872774	491.246	0.645168	129.761	3.40031	2.17489	244.165	0.975249	8.99844	150.219	0.234174	0.227013	103.71	0.829766	0.700062	0.8833	0.456012	0.125274	29.2699	1.31584	0.710774	0.429582	0.617263	55.0271	52.3963	7.17907	81.9659	486.227	2.17697	0.749186	0.484996	99.3908	0.548773	0.293683	84.1385	114.758	80.9056	0.705012	0.720395
CADLAD_269	0	1041.97	0.0949502	0.619138	0.0584666	0.110714	0.027753	561.086	1.70481	423.639	0.958019	585.2	0.632823	204.974	2.78678	0.49954	245.413	0.170143	5.93576	128.749	0.286463	0.27807	109.713	0.567377	0.327827	0.548414	0.389456	0.0521236	36.3503	0.940489	0.5128	0.315528	0.473686	59.5159	44.7331	6.59104	98.4324	502.628	2.43123	0.654803	0.415513	91.8099	0.759589	0.585637	93.7892	107.104	83.5546	0.780124	0.705426
CADLAD_270	0	779.18	0.12269	0.687612	0.0479575	0.0757927	0.037399	482.494	1.79169	540.39	0.964735	487.161	0.721411	134.575	0.995927	1.05323	249.022	0.561322	7.78877	197.069	0.463971	0.484804	97.0094	0.684816	0.452601	0.665015	0.5413	0.231515	57.9884	1.3066	0.819579	0.667942	0.952713	87.426	84.2235	5.13533	118.97	514.244	1.8574	0.824385	0.742152	141.363	0.90053	0.614931	142.971	155.819	139.038	0.892303	0.904625
CADLAD_271	0	802.049	0.197152	0.750855	1.75632	7.84304	0.273612	349.338	1.45948	574.522	0.882245	506.914	0.810422	194.116	1.63947	2.21929	181.247	0.755607	9.61597	196.293	0.379907	0.340027	111.717	0.44946	0.181573	0.401274	0.38974	0.0441941	32.895	1.08374	0.537002	0.246757	0.742223	75.5397	69.2895	4.00059	141.677	519.977	1.8956	0.839358	0.716997	175.659	0.884899	0.667707	156.316	171.569	152.131	0.886706	0.867688
CADLAD_272	0	973.537	0.108176	0.557487	0.0154473	0.0202599	0.00904164	383.328	1.12407	458.71	0.981168	548.828	0.579606	197.188	1.65117	0.296487	268.604	0.167943	7.90795	184.213	0.303975	0.300123	100.542	0.743044	0.526364	0.718661	0.463448	0.0978447	40.9785	0.494461	0.531238	0.216238	0.795852	54.4975	48.2387	7.6742	89.7431	597.515	1.0244	0.738604	0.227172	150.633	0.854982	0.533468	174.838	181.597	169.211	0.931792	0.940882
CADLAD_273	0	1142.05	0.050536	0.487027	0.116098	0.189061	0.0344639	357.627	1.00346	429.372	0.970934	437.802	0.713724	116.086	3.71662	2.74058	271.989	2.22771	19.2422	95.4665	0.179314	0.165429	113.05	0.392743	0.123135	0.312942	0.394446	0.0434339	30.8339	1.18706	0.494981	0.397694	0.441825	51.5699	39.6722	6.2272	106.985	486.757	3.11838	0.565692	0.313375	111.272	0.484232	0.260783	87.8118	107.682	84.2947	0.782811	0.738748
CADLAD_274	0	1105.36	0.0428112	0.617994	0.0864403	0.130117	0.0309036	362.245	1.1744	430.025	0.882166	426.124	0.406049	160.303	1.7276	3.06629	202.599	1.94566	15.7802	94.8504	0.184398	0.174011	117.387	0.460227	0.143286	0.297644	0.383008	0.0985973	32.551	1.6978	0.644589	0.391013	0.694645	39.3114	33.1362	9.46978	59.5213	548.391	2.90629	0.771059	0.665347	61.2612	0.82172	0.151642	54.168	63.0894	46.3634	0.734884	0.68621
CADLAD_275	1	921.946	0.235243	0.722047	0.766188	2.18309	0.261256	549.154	3.44235	583.631	0.917518	340.282	0.624157	76.0763	0.198115	3.00106	50.1426	0.700162	13.2836	96.9677	0.326609	0.339414	106.132	0.707845	0.4913	0.671286	0.77362	0.349596	28.1734	1.87551	0.707937	0.7894	0.871137	24.8423	22.8472	15.8472	37.8966	583.919	0.984042	0.841075	0.476451	32.7157	0.812169	0.429374	42.6901	43.4758	40.5582	0.932892	0.948831
CADLAD_276	0	1049.09	0.0747078	0.597227	0.0886495	0.163791	0.0510464	774.196	1.00262	432.865	0.906358	505.78	0.716859	170.406	2.35035	1.92978	147.396	1.12955	11.2391	135.924	0.221334	0.199978	86.3972	0.950095	0.920084	0.965416	0.38647	0.114998	32.4486	0.309768	0.371893	0.0771852	0.526014	60.6034	52.9869	6.28526	97.5511	515.222	2.86698	0.738047	0.438516	115.391	0.788847	0.521775	100.55	125.664	91.7617	0.730215	0.751129
CADLAD_277	0	1038.17	0.13545	0.619296	0.0533946	0.118507	0.0324949	324.803	1.60439	535.972	0.955163	468.329	0.0469332	123.446	0.0287555	0.175704	307.788	0.0812532	7.31567	124.951	0.242142	0.224838	117.553	0.595546	0.346833	0.551039	0.583021	0.279605	28.7521	2.03411	0.756375	0.494045	0.671364	47.8486	41.9001	11.1677	55.9162	536.987	4.0479	0.657754	0.214978	56.8241	0.792357	0.370455	60.7044	65.1171	51.5914	0.792287	0.772829
CADLAD_278	1	933.772	0.0859309	0.673736	0.331744	0.717633	0.117016	306.604	1.42	453.996	0.947189	534.049	0.706327	125.325	1.11342	1.70556	163.051	0.961243	5.84452	162.937	0.38431	0.368062	106.347	0.751996	0.455274	0.635409	0.346682	0.117319	32.8498	1.1361	0.615665	0.439038	0.646516	70.6154	67.099	6.14029	94.8826	512.995	1.94102	0.803989	0.725245	102.22	0.852549	0.775326	121.321	137.751	113.98	0.82743	0.79532
CADLAD_279	0	947.68	0.138819	0.76341	0.0695443	0.12113	0.0290908	273.096	1.81711	427.743	0.946875	522.669	0.521277	164.638	4.39526	2.044	155.827	1.22148	7.84611	223.194	0.424959	0.424099	93.2547	0.882486	0.804526	0.901161	0.552159	0.0949407	53.296	1.25962	0.841988	0.573792	0.894767	91.1129	83.2126	4.45801	122.587	516.945	1.66088	0.892676	0.795385	139.235	0.908503	0.636543	139.763	140.958	136.018	0.964951	0.949419
CADLAD_280	0	889.894	0.0456061	0.480475	0.0651891	0.160587	0.0138066	294.969	1.08722	492.859	0.923389	531.579	0.353038	161.523	1.44745	3.50456	152.003	1.47725	12.7931	114.685	0.18219	0.170243	104.909	0.824106	0.688632	0.840505	0.486186	0.042803	42.1819	1.86936	0.688937	0.585916	0.541533	43.2129	34.529	7.35583	75.5228	495.775	3.19855	0.773346	0.379191	101.919	0.743293	0.571142	76.6289	100.358	67.4208	0.671805	0.699196
CADLAD_281	0	1021.85	0.093598	0.768049	0.202688	0.431909	0.0542246	269.9	1.2766	442.007	0.90048	513.73	0.445434	101.244	3.04687	0.421043	109.98	0.137977	7.60634	215.482	0.447738	0.473464	109.866	0.838906	0.692751	0.827763	0.367183	0.19633	23.3804	0.636941	0.403731	0.183138	0.594679	22.0434	15.5455	12.3328	51.7576	582.389	1.11034	0.766076	0.243737	60.5287	0.687759	0.245645	52.8927	61.0491	44.1464	0.72313	0.67181
CADLAD_282	0	636.583	0.0512567	0.362035	0.0818831	0.143003	0.0273716	372.932	1.09743	449.134	0.942913	504.569	0.355949	99.6129	0.503357	0.560661	154.206	0.187918	16.753	168.231	0.328865	0.319761	111.819	0.664333	0.418299	0.63706	0.428302	0.104304	38.993	0.699852	0.374987	0.202728	0.454249	46.0222	32.6371	9.19236	84.2535	578.079	2.8619	0.426204	0.018823	106.772	0.40186	0.134937	83.1484	118.482	62.3532	0.526268	0.477968
CADLAD_283	0	879.326	0.0955509	0.642022	0.0737548	0.202036	0.0198618	280.427	1.25852	486.358	0.89896	460.747	0.618808	88.3503	3.32981	2.89651	179.696	2.19043	9.74419	180.413	0.365633	0.364958	98.0386	0.7909	0.60415	0.787599	0.261306	0.0541762	28.9908	1.38651	0.670169	0.401074	0.520971	57.5883	51.6682	5.7303	102.056	491.318	1.94711	0.830946	0.646027	124.143	0.872315	0.589588	99.3227	125.464	93.2872	0.743537	0.682349
CADLAD_284	0	815.829	0.0750368	0.586527	0.04173	0.104176	0.0272007	444.012	2.3501	561.992	0.947367	463.786	0.50366	69.1851	0.0608208	0.664895	83.378	0.253812	20.1637	116.867	0.24403	0.246173	114.429	0.464467	0.238516	0.507674	0.490475	0.115997	29.4775	0.724694	0.480661	0.232451	0.649581	35.7789	33.2243	11.043	60.7929	604.221	0.80243	0.761134	0.440968	57.8568	0.550253	0.252286	55.612	73.35	44.1824	0.60235	0.575875
CADLAD_285	0	882.77	0.156118	0.75669	0.310138	1.47599	0.187875	608.498	2.58964	722.084	0.805067	293.779	0.50882	26.4238	1.21247	3.25575	42.7715	1.06723	11.3647	76.9223	0.211669	0.0241182	107.109	0.885133	0.720958	0.878127	0.75884	0.711839	27.6681	1.33183	0.684906	0.581668	0.773704	25.7876	18.2744	18.3064	33.0446	583.935	1.88076	0.727957	0.748191	37.8112	0.842355	0.280221	39.2724	44.9617	31.5007	0.700613	0.629656
CADLAD_286	0	901.06	0.108935	0.584605	0.0625623	0.0929812	0.0403163	793.894	1.21791	482.283	0.936292	406.674	0.503068	110.209	0.363962	0.194474	182.195	0.0506533	1.20595	167.397	0.327644	0.350525	105.737	0.572828	0.320523	0.527548	0.664892	0.180225	24.4069	1.00902	0.653332	0.286942	0.711008	39.2374	35.418	7.62159	74.2721	576.5	0.530932	0.868917	0.502871	112.277	0.899662	0.649869	116.146	120.825	107.77	0.891951	0.900529
CADLAD_287	0	946.026	0.131425	0.574509	0.172708	0.442018	0.0705784	352.592	1.40574	509.933	0.980512	536.862	0.800984	136.907	1.88601	2.19079	173.828	1.24046	8.31494	178.53	0.305584	0.269895	93.18	0.89526	0.822622	0.92472	0.506617	0.118302	33.2929	1.1	0.660117	0.604702	0.712519	58.6519	52.6327	4.53072	119.095	488.183	2.3305	0.804566	0.678008	124.371	0.771275	0.535335	117.979	136.836	108.173	0.790526	0.76489
CADLAD_288	0	976.23	0.109942	0.744337	0.0399818	0.054877	0.025081	668.434	0.933823	489.326	0.95246	474.397	0.64041	129.613	1.37184	1.17883	173.619	0.750343	7.10902	216.725	0.425941	0.457457	108.256	0.721652	0.508218	0.694635	0.451991	0.199539	38.1973	1.78913	0.826509	0.747392	0.66179	65.4689	61.975	8.75468	67.6956	479.084	2.41669	0.668922	0.384645	86.0427	0.732771	0.430215	96.8118	106.044	87.6996	0.827008	0.778779
CADLAD_289	1	1088.93	0.0745757	0.713414	0.106537	0.168024	0.0291431	527.9	1.75583	515.443	0.944269	546.767	0.538111	198.771	2.91203	3.0424	219.807	1.59761	6.33143	203.929	0.337584	0.33664	113.889	0.483216	0.202755	0.406623	0.412784	0.0627166	26.3604	1.11383	0.603158	0.165357	0.511658	50.8863	46.6482	8.78913	68.2344	579.961	3.41941	0.780842	0.314116	108.683	0.888074	0.362762	137.327	141.989	130.007	0.91561	0.915113
CADLAD_290	0	1123.27	0.0663857	0.476205	0.186926	0.313288	0.0570158	307.637	1.54933	433.881	0.873115	613.228	0.708936	126.625	2.39399	1.03741	73.5595	0.818743	7.14698	99.8972	0.236679	0.238534	97.0715	0.930797	0.890685	0.943388	0.523297	0.194645	21.7393	0.675462	0.596676	0.170485	0.63833	43.4602	34.6482	12.0553	53.657	580.38	2.01499	0.656848	0.107622	58.3973	0.785521	0.245279	7.60645	7.71025	7.08993	0.919546	0.912812
CADLAD_291	0	1011.34	0.0775445	0.6481	0.156966	0.209619	0.0608983	767.941	1.31481	604.728	0.94394	539.331	0.687165	97.3699	0.05199	0.145292	174.5	0.032268	2.02404	89.2676	0.179819	0.162797	105.125	0.486557	0.215641	0.440113	0.415726	0.12894	33.1356	0.343325	0.314365	0.0624343	0.501993	50.7421	30.2881	8.37703	88.6079	505.133	2.92598	0.502163	0.274029	78.7334	0.699868	0.423996	130.867	137.263	123.605	0.900498	0.887388
CADLAD_292	0	1138.53	0.140641	0.67042	0.240508	0.9414	0.103284	339.744	1.0922	466.563	0.964848	553.042	0.560299	137.978	1.38812	2.61146	123.86	0.53302	9.82371	122.708	0.18299	0.169589	109.843	0.719049	0.528116	0.70794	0.580593	0.136392	35.921	2.39391	0.548352	0.593169	0.470017	65.1648	57.1202	7.46677	88.9265	520.918	3.39763	0.62338	0.260543	99.7708	0.610961	0.357892	90.7969	121.764	72.634	0.596517	0.620936
CADLAD_293	0	760.936	0.0688509	0.299626	0.106139	0.144026	0.0552591	570.262	2.63357	614.882	0.580845	309.373	0.50568	60.4916	0.0410537	1.78362	98.2274	0.534494	10.122	72.0255	0.227537	0.0426839	118.425	0.557906	0.262685	0.470338	0.281028	0.0861376	20.9054	0.924516	0.584641	0.268916	0.387999	26.6563	17.095	17.7956	57.9941	676.6	2.80397	0.340747	0.328947	48.313	0.533407	0.270211	42.229	52.265	27.9307	0.534404	0.469978
CADLAD_294	0	864.175	0.0632708	0.395547	0.163465	0.247709	0.0408122	408.592	0.865104	408.52	0.902117	557.583	0.54177	129.322	1.1159	1.21247	280.931	0.845106	5.73838	251.046	0.436264	0.47157	114.235	0.597993	0.366731	0.593216	0.496456	0.0961132	23.1217	0.331861	0.347489	0.0651077	0.634923	40.878	31.2075	8.31569	69.568	488.206	3.37746	0.583742	0.210392	76.4839	0.659393	0.3488	91.8296	105.566	79.2156	0.750393	0.743107
CADLAD_295	0	645.065	0.0568586	0.483975	0.0487394	0.0835044	0.0294129	616.282	1.26446	185.559	0.587653	222.699	0.626142	61.1369	1.12935	2.42426	47.6256	1.12445	12.795	54.7677	0.154276	0.0670596	106.448	0.654753	0.439222	0.679525	0.325328	0.0194255	30.8265	1.36762	0.757825	0.348691	0.49153	29.2065	19.504	17.3838	47.8259	676.436	2.62339	0.430321	0.439577	57.5859	0.343899	0.485936	54.6674	76.4433	41.824	0.547124	0.505872
CADLAD_296	0	937.538	0.112028	0.744382	0.877687	1.55594	0.464435	536.858	2.02811	471.478	0.850991	501.797	0.766868	194.657	3.05874	2.92264	287.564	2.14679	10.7527	261.913	0.443862	0.370764	104.591	0.504799	0.221515	0.433258	0.668332	0.557963	34.2145	0.957598	0.605723	0.302455	0.881626	75.3286	70.8195	6.66528	89.9446	549.425	2.65949	0.774971	0.538887	113.174	0.791726	0.50417	146.807	164.146	140.401	0.855342	0.864097
CADLAD_297	0	1037.38	0.249063	0.819383	0.718943	2.13748	0.309	380.877	1.48242	529.251	0.920093	435.823	0.756522	193.076	1.84038	2.67844	268.127	1.18843	6.70606	304.265	0.606422	0.568603	89.9265	0.896151	0.863936	0.954247	0.726323	0.381738	55.0215	1.5526	0.866776	0.87643	0.927712	136.398	132.783	3.1803	160.211	499.878	1.5078	0.943811	0.855823	164.554	0.942915	0.840334	222.775	230.95	218.847	0.947598	0.942532
CADLAD_298	0	1216.47	0.0465518	0.485624	0.0764044	0.132036	0.0234285	711.772	2.04424	410.507	0.976179	490.257	0.515629	136.701	0.0505223	0.192409	115.038	0.10324	4.97347	107.886	0.237546	0.20391	118.357	0.436733	0.181787	0.413934	0.334789	0.0539258	19.8327	1.41951	0.512676	0.479139	0.675242	42.6968	31.0215	12.5574	72.2359	630.26	4.09245	0.401953	0.218762	92.8581	0.342323	0.0882906	44.9911	72.6476	29.7615	0.409669	0.429577
CADLAD_299	0	1082.06	0.0599413	0.543929	0.108331	0.184664	0.0451947	789.939	2.24965	390.492	0.853956	502.001	0.320268	42.1363	1.43313	1.44305	67.0649	0.754659	12.769	63.9929	0.209798	0.103092	108.143	0.700575	0.455955	0.676018	0.333105	0.16071	32.774	0.585116	0.410408	0.144353	0.389263	37.2309	24.0528	15.3954	50.5209	572.799	3.43343	0.539306	0.269101	54.9287	0.309534	0.238375	48.6607	74.621	37.0653	0.496713	0.522765
CADLAD_300	0	843.802	0.0729002	0.390604	0.0692878	0.119723	0.0270069	513.959	28.4734	169.834	0.867171	272.928	0.359529	79.4668	0.0732893	1.66113	10.9559	0.922894	7.67253	45.3215	0.127298	0.0247882	110.325	0.510557	0.217111	0.387955	0.311477	0.0254649	31.9111	1.06983	0.406138	0.299163	0.397579	28.986	22.4924	122.961	4.91506	512.706	1.95128	0.786473	0.776636	41.698	0.418044	0.547407	14.6421	19.4292	11.7948	0.607066	0.624364
CADLAD_301	0	1123.81	0.0831393	0.498253	0.033943	0.0673503	0.0257284	780.917	2.7466	464.231	0.512134	310.434	0.545195	46.1673	0.66496	2.09742	82.5826	0.848746	6.66863	44.2451	0.120502	0.046432	111.564	0.517516	0.275381	0.492015	0.330436	0.0460478	24.8407	0.0379763	0.330616	0.0544533	0.403793	38.4022	28.7551	18.9092	50.807	670.731	1.84278	0.488471	0.728759	64.5618	0.415865	0.437754	42.9928	66.6441	32.5068	0.487768	0.435333
CADLAD_302	0	1007.63	0.045205	0.545732	0.0303773	0.0510765	0.0133598	492.836	1.54713	409.991	0.854787	466	0.931329	113.38	0.0797633	0.245852	234.144	0.0790421	19.1467	111.956	0.218176	0.210203	115.145	0.665192	0.412214	0.61999	0.45457	0.195624	28.0772	0.400231	0.619424	0.21312	0.696879	54.0415	48.4729	9.38093	64.2516	557.978	0.584731	0.802103	0.410181	63.6127	0.660816	0.199182	66.2739	69.331	57.6964	0.832189	0.776758
CADLAD_303	0	1119.06	0.0787617	0.538354	0.0679185	0.19444	0.0310539	271.97	1.76474	471.457	0.878458	526.032	0.635544	190.595	2.28234	2.01846	227.056	0.873653	7.77799	211.852	0.397573	0.41445	95.9746	0.902788	0.858888	0.917233	0.29669	0.0613036	34.361	0.587739	0.338121	0.151627	0.570136	37.4585	27.3227	6.98452	83.3205	514.077	2.8304	0.799286	0.563163	83.9462	0.698263	0.240468	94.1633	103.33	87.7897	0.849609	0.836188
CADLAD_304	1	962.615	0.0658029	0.307321	0.0974879	0.19213	0.0507597	360.115	1.06495	485.194	0.988749	522.952	0.323644	121.835	3.26337	1.31019	149.411	0.983653	15.7889	84.6932	0.129004	0.122405	98.9085	0.844713	0.734847	0.842745	0.492257	0.1521	38.0892	1.35416	0.707503	0.435705	0.635788	59.2463	55.5616	7.95134	69.2211	492.923	3.01819	0.731995	0.38579	82.7063	0.653736	0.261686	84.5651	90.7122	70.9129	0.781735	0.775218
CADLAD_305	0	993.685	0.0800406	0.671478	0.130179	0.253618	0.0903446	402.758	1.58644	564.044	0.949545	524.122	0.540151	129.014	1.23311	1.35104	174.264	0.537722	12.3039	134.298	0.260509	0.242698	104.491	0.856088	0.791437	0.918836	0.605383	0.315247	32.8796	1.42885	0.77442	0.667267	0.857537	65.3822	58.1381	8.53578	70.0301	591.229	0.731856	0.848205	0.438223	103.59	0.867687	0.827546	99.3133	121.104	90.1465	0.744371	0.788791
CADLAD_306	0	1032.04	0.0604515	0.462375	0.150089	0.278173	0.0435537	772.26	2.35633	419.518	0.884422	370.528	0.345609	72.6661	0.104565	0.137297	149.304	0.0734531	2.90704	102.461	0.206154	0.158599	113.636	0.573187	0.285419	0.510959	0.526562	0.223132	23.3151	1.55697	0.610333	0.279336	0.490641	34.4458	28.9102	9.56715	74.3764	602.961	3.44317	0.677803	0.261351	58.6305	0.525472	0.0649305	55.6441	69.1611	37.3871	0.540579	0.488754
CADLAD_307	0	1155.49	0.0282556	0.623476	0.0479634	0.106038	0.020109	324.699	1.24376	428.357	0.864354	557.775	0.363821	103.708	0.578292	0.873511	136.788	0.534516	13.9414	129.017	0.222016	0.232913	122.677	0.462416	0.1644	0.30686	0.398852	0.0979091	29.1904	0.474618	0.382769	0.0826897	0.527635	44.2598	26.1551	7.86907	86.8943	500.954	3.21481	0.60111	0.392874	80.0668	0.665327	0.359825	75.2487	87.7874	57.0848	0.650262	0.619653
CADLAD_308	0	1043.83	0.0652538	0.509374	0.171169	0.288428	0.0462129	458.435	1.40575	435.374	0.780699	481.408	0.443218	111.917	1.9228	0.201768	77.8775	0.0821381	9.49523	156.136	0.25745	0.229466	89.3293	0.854501	0.706652	0.895056	0.42293	0.0664526	24.0406	0.463818	0.581323	0.137801	0.695522	43.5186	34.6747	10.3081	57.478	559.535	1.18543	0.833838	0.380717	100.35	0.783547	0.371331	60.2289	69.0284	50.6337	0.73352	0.650187
CADLAD_309	0	993.211	0.076323	0.638015	0.115002	0.174261	0.0412592	286.748	1.01068	429.504	0.960698	543.823	0.744749	115.172	2.90539	1.77323	162.32	0.67113	7.7231	150.126	0.240861	0.240321	113.367	0.525149	0.264114	0.506011	0.379838	0.128724	31.9714	0.772053	0.58068	0.252248	0.750764	65.8799	59.1224	7.98927	77.7907	580.564	3.87255	0.751949	0.187755	100.905	0.608372	0.295532	99.0879	130.823	86.6128	0.662059	0.625399
CADLAD_310	1	786.621	0.339974	0.854432	0.325119	3.27864	0.17173	365.42	1.63549	494.755	0.957594	546.061	0.778771	266.307	3.23704	1.92129	295.359	1.13191	6.14381	280.092	0.49926	0.452677	94.8705	0.867687	0.715749	0.834356	0.664742	0.436507	88.6267	1.19804	0.922506	0.834268	0.934451	112.385	110.393	2.49947	206.342	489.73	1.53199	0.95096	0.840975	211.53	0.837107	0.887164	270.001	272.208	261.689	0.961359	0.938825
CADLAD_311	0	932.642	0.119683	0.811344	1.08006	2.15162	0.280721	462.523	2.46107	550.452	0.96106	385.676	0.72112	115.969	0.15959	0.101344	132.077	0.0468774	15.0079	118.322	0.288666	0.294242	112.111	0.523107	0.256852	0.497003	0.509552	0.35874	24.8049	0.285782	0.588848	0.0985096	0.532368	51.2033	41.6868	10.995	59.6547	593.923	5.96951	0.797059	0.0208869	65.8485	0.82407	0.568228	52.5511	56.4957	51.5911	0.913187	0.890918
CADLAD_312	0	1081.17	0.0605173	0.579349	0.0412794	0.119794	0.0118322	259.908	1.1971	467.431	0.912649	564.838	0.449345	113.986	0.68752	0.759661	134.575	0.408174	9.02754	171.479	0.262636	0.228615	106.435	0.649694	0.433404	0.660168	0.313508	0.0768736	43.0948	1.34103	0.492663	0.439377	0.38127	56.7266	40.3469	6.03952	94.3759	479.727	2.56788	0.700908	0.507929	92.4987	0.737275	0.567995	92.6885	126.63	72.4775	0.572357	0.540976
CADLAD_313	0	895.116	0.0615733	0.373022	0.125763	0.165824	0.053399	306.954	0.935462	453.432	0.894872	543.097	0.564504	99.6137	0.920931	1.51493	114.436	0.858251	12.6657	220.735	0.345356	0.349729	109.896	0.581613	0.301326	0.540354	0.387652	0.107443	38.7216	1.08432	0.41695	0.257618	0.534014	50.8825	37.1932	6.85399	97.3889	474.548	3.02796	0.517658	0.171114	120.538	0.557193	0.425893	92.5225	132.593	75.2441	0.567482	0.547921
CADLAD_314	0	873.129	0.111741	0.508728	0.13277	0.200455	0.03938	529.927	1.24776	393.305	0.831525	455.441	0.676283	241.568	1.30427	2.09761	299.203	1.89027	5.24361	180.664	0.461147	0.437605	89.0893	0.872317	0.777129	0.898878	0.360536	0.213287	31.3521	1.41999	0.423959	0.375662	0.513656	54.1546	49.558	6.32837	98.5165	515.955	2.39025	0.725872	0.498624	111.438	0.662526	0.365801	119.254	136.272	111.299	0.816741	0.819271
CADLAD_315	0	1044.17	0.0531418	0.539181	0.213988	0.301288	0.108976	601.53	1.82825	440.369	0.970365	493.267	0.58634	87.6818	0.158007	0.167818	78.9348	0.0760842	19.1054	127.092	0.225781	0.185829	107.564	0.619226	0.369312	0.620755	0.432142	0.102266	30.1397	1.16528	0.486465	0.31719	0.576514	39.8375	26.8563	10.873	78.9916	580.592	3.01828	0.458283	0.270624	82.499	0.551776	0.101194	77.9727	104.516	68.827	0.658531	0.639772
CADLAD_316	0	799.179	0.167702	0.848325	0.0648764	0.117242	0.0502308	346.513	1.18038	486.303	0.969471	480.711	0.785157	224.57	3.22618	2.32101	244.469	1.24082	6.12971	291.911	0.574857	0.524949	87.0907	0.889122	0.748015	0.846286	0.529772	0.0941724	58.6721	0.949393	0.840659	0.558301	0.939485	154.474	149.928	2.95591	170.606	498.261	1.4078	0.947105	0.863615	237.972	0.908009	0.672838	273.225	276.216	252.401	0.913783	0.922139
CADLAD_317	0	1188.54	0.0411686	0.529547	0.0715221	0.115875	0.0316532	338.502	0.992463	418.985	0.842733	538.312	0.463641	96.6949	3.62243	2.00778	167.923	1.15843	12.778	113.44	0.184116	0.177132	111.066	0.812219	0.642231	0.805348	0.412008	0.098288	22.0519	0.457432	0.439258	0.096759	0.4984	40.0313	29.9766	11.8328	58.4099	547.16	4.97804	0.572598	0.123145	69.1493	0.461726	0.137576	68.4988	80.2578	57.8624	0.720957	0.668062
CADLAD_318	0	615.12	0.0560974	0.508065	0.0868615	0.0998921	0.0382917	508.408	1.97213	426.498	0.949557	560.111	0.533868	189.458	2.61886	4.05586	313.275	1.85245	17.4853	130.99	0.203715	0.182144	118.825	0.406967	0.134938	0.344321	0.496294	0.282138	30.8898	0.273945	0.442446	0.0948671	0.618553	43.0274	30.2939	9.14704	58.2577	560.281	0.558454	0.754076	0.341234	71.7319	0.72798	0.648808	97.8252	115.041	86.6467	0.753182	0.750392
CADLAD_319	0	819.067	0.129452	0.835947	0.112784	0.251418	0.0600589	519.072	2.36437	499.749	0.924679	359.625	0.0971354	120.329	0.0977716	0.195776	117.09	0.0793009	2.46843	214.059	0.433501	0.45576	112.346	0.574144	0.331168	0.590261	0.395059	0.0875958	21.6926	0.0760829	0.379184	0.0865327	0.73213	43.6555	37.7079	8.08941	78.1265	577.495	0.336427	0.764443	0.381511	89.4718	0.744439	0.306329	72.5944	97.8863	63.1515	0.645152	0.679344
CADLAD_320	0	1186.88	0.0413147	0.546148	0.135754	0.296355	0.0306477	421.278	1.11174	558.059	0.913096	535.924	0.331525	101.872	1.13807	0.770442	115.233	0.206316	8.24803	124.021	0.219374	0.203605	113.478	0.568961	0.337699	0.577042	0.352525	0.0405579	29.5965	0.535065	0.425927	0.0895837	0.372054	48.3326	30.6612	6.23353	98.4778	582.625	2.54957	0.712312	0.791276	82.7325	0.481374	0.148404	65.9517	97.6163	43.7881	0.448574	0.451232
CADLAD_321	0	996.842	0.127841	0.625763	0.122235	0.181919	0.0341458	315.419	1.18284	538.498	0.952223	538.629	0.602548	111.169	1.56004	1.98624	138.453	0.873911	13.3138	146.677	0.224463	0.209572	105.809	0.783608	0.63276	0.808432	0.531514	0.132308	38.2108	0.725859	0.806183	0.195687	0.878561	115.437	107.318	3.80436	139.106	503.483	1.79262	0.890981	0.616418	115.679	0.887198	0.549333	109.524	117.178	97.8735	0.835259	0.814577
CADLAD_322	0	910.052	0.0940831	0.611177	0.0868495	0.13188	0.053969	412.58	1.15375	449.989	0.954073	532.257	0.633518	160.892	1.15458	0.948505	233.719	0.671874	8.68644	212.946	0.380684	0.394113	83.1323	0.975927	0.976555	0.949801	0.677128	0.339877	34.4851	1.03187	0.802016	0.381371	0.731043	81.0408	74.6272	3.99118	133.363	509.549	1.77799	0.891964	0.774763	147.078	0.898561	0.796744	147.227	151.547	143.358	0.945964	0.950399
CADLAD_323	0	402.993	0.145138	0.644299	0.184386	0.253807	0.0559834	281.765	7.68232	526.959	0.947878	440.808	0.470288	63.3794	0.0270738	0.117916	101.885	0.0637191	6.73344	62.6511	0.133096	0.177995	119.616	0.595794	0.415839	0.598167	0.386481	0.149351	24.2213	1.30353	0.548348	0.386989	0.463478	6.24522	5.0592	48.7501	13.6499	580.638	2.40323	0.633863	0.411606	39.4802	0.478719	0.076881	29.9163	45.3847	20.8794	0.460054	0.46358
CADLAD_324	0	612.632	0.0521118	0.595186	0.0694595	0.168577	0.0240141	353.529	2.19081	452.037	0.860121	546.751	0.484577	103.593	0.0990897	0.308824	140.66	0.0847656	9.85602	103.116	0.173443	0.17439	115.092	0.593648	0.342175	0.594344	0.421032	0.105052	29.9017	1.21961	0.469795	0.338593	0.689947	46.3532	39.7344	12.2919	66.8695	594.212	6.65496	0.517162	0.0322468	82.6481	0.662447	0.11817	55.899	83.1439	45.5249	0.547544	0.590702
CADLAD_325	0	1016.92	0.0754133	0.60821	0.081184	0.150091	0.037334	307.37	2.57755	436.659	0.831265	458.727	0.475275	135.077	0.0147266	0.416484	148.865	0.0843795	1.93442	134.208	0.303762	0.289684	116.525	0.424815	0.129393	0.305539	0.660445	0.4031	22.2891	0.19758	0.605506	0.0336462	0.637158	35.2612	25.8677	14.4401	48.4972	605.317	0.944225	0.771085	0.451351	58.0336	0.871686	0.439489	46.3693	49.8602	43.155	0.86552	0.882286
CADLAD_326	0	1018.05	0.176564	0.733902	0.0986442	0.150092	0.0673497	422.821	3.97065	590.729	0.920457	351.506	0.578148	85.7615	0.109789	0.136118	177.069	0.0782087	1.32804	146.026	0.542313	0.517974	94.1915	0.862092	0.767373	0.887009	0.470579	0.152347	35.7831	1.31905	0.859873	0.694396	0.887962	48.6114	48.1978	10.5823	57.2114	572.863	0.995896	0.878361	0.577403	74.595	0.868365	0.91525	100.14	101.834	92.6527	0.909841	0.841376
CADLAD_327	0	554.979	0.0425484	0.442792	0.0700633	0.104941	0.0229762	310.257	1.08953	454.651	0.954629	606.333	0.3115	154.076	0.725182	1.22011	256.12	0.905559	9.06165	270.557	0.428648	0.402007	125.16	0.492772	0.229667	0.46581	0.537407	0.248126	24.697	0.126189	0.53643	0.146263	0.567004	39.733	29.6055	12.7187	58.2966	562.533	4.06765	0.578213	0.196099	66.3028	0.520379	0.11452	65.9801	80.9823	52.654	0.650191	0.612387
CADLAD_328	0	1021.07	0.0555435	0.545107	0.119054	0.159542	0.0668559	402.221	1.80141	193.777	0.815546	461.377	0.296653	173.352	1.9675	2.31501	175.758	1.89053	15.2467	128.315	0.223865	0.188987	116.039	0.509128	0.227348	0.450375	0.53422	0.0868602	26.9377	0.573294	0.595713	0.236497	0.652448	48.1032	39.809	13.1408	52.2521	579.57	2.82089	0.71015	0.0933039	49.9049	0.511729	0.611504	59.5521	66.4694	56.4765	0.849662	0.854952
CADLAD_329	0	1012.99	0.0526682	0.573703	0.169093	0.311773	0.112584	352.517	1.97886	652.09	0.810631	561.703	0.658443	119.733	0.574422	0.178618	118.425	0.032416	21.9014	96.5929	0.189643	0.16342	115.993	0.514035	0.267272	0.523469	0.301687	0.106458	32.3721	0.341818	0.302191	0.0712424	0.353185	48.4565	27.3307	12.2566	84.1673	650.963	3.92011	0.351544	0.180888	89.2927	0.435595	0.0997598	70.2341	111.618	45.7076	0.409501	0.439149
CADLAD_330	0	1291.42	0.035168	0.591449	0.0722485	0.174522	0.0287685	390.66	0.964007	430.728	0.942228	551.057	0.435174	97.9337	1.82276	2.11245	228.968	1.11073	11.8877	189.921	0.341027	0.339848	123.369	0.446993	0.167171	0.36539	0.245733	0.0154648	46.2605	1.19731	0.519013	0.295954	0.50426	61.9901	54.5937	6.77349	105.516	520.349	4.08316	0.463726	0.222888	114.108	0.372464	0.146657	92.5316	138.243	65.3559	0.472762	0.435257
CADLAD_331	0	845.772	0.103635	0.651325	0.149425	0.238174	0.0496436	824.051	2.51342	492.294	0.962483	471.172	0.501428	108.93	0.122281	0.139305	151.084	0.100174	10.0422	102.392	0.296091	0.142807	114.274	0.684657	0.494892	0.734902	0.597783	0.305083	20.3286	1.16852	0.66948	0.314371	0.588268	32.6319	27.0543	15.2284	39.0166	603.806	2.51142	0.753694	0.504182	60.6493	0.878929	0.216172	51.903	59.047	46.8476	0.793394	0.760326
CADLAD_332	0	668.307	0.0779597	0.564398	0.0766102	0.192685	0.0247916	438.536	1.15243	572.488	0.742548	549.603	0.411776	72.1364	0.281768	3.43823	144.78	2.58746	18.4204	106.319	0.19312	0.185262	112.082	0.696131	0.483433	0.679637	0.246162	0.0645385	28.7142	0.371546	0.351693	0.165842	0.39245	41.0666	29.9488	8.88353	91.0327	582.813	3.43302	0.50644	0.133587	89.3259	0.502914	0.355173	64.9036	101.668	47.628	0.468466	0.518824
CADLAD_333	1	1097.68	0.121159	0.721447	0.532305	5.77897	0.147628	330.068	1.05811	456.895	0.911829	479.155	0.600577	163.859	1.34789	2.78151	187.007	1.03349	6.63492	211.798	0.450339	0.437832	100.301	0.729785	0.491981	0.714427	0.40668	0.156264	42.1634	1.73457	0.835652	0.738494	0.887991	83.0562	76.1465	5.43791	97.2098	495.29	2.06908	0.887407	0.60685	136.191	0.891046	0.89374	158.16	159.514	152.91	0.958601	0.954252
CADLAD_334	0	1176.66	0.0434754	0.514929	0.0437907	0.0773033	0.0229514	687.317	2.64117	492.123	0.967365	407.809	0.512289	199.297	1.61866	0.0925987	251.556	0.0544523	1.97719	139.954	0.437973	0.412692	117.724	0.597346	0.360774	0.598654	0.54158	0.267338	30.5648	1.28588	0.741127	0.435344	0.69676	30.6261	20.0528	16.0763	40.7069	615.578	1.24174	0.767354	0.404552	45.3785	0.872419	0.570621	45.5266	49.6789	41.9783	0.844992	0.841058
CADLAD_335	0	1104.3	0.0655066	0.611904	0.0605092	0.139863	0.0455636	379.87	1.06039	438.496	0.929429	474.5	0.709556	211.266	3.31527	2.13313	226.926	1.49637	10.0951	192.893	0.404159	0.368122	110.962	0.579558	0.315419	0.539571	0.594252	0.0915013	22.2509	0.495359	0.64874	0.192923	0.612224	50.0381	42.9687	7.57451	66.9404	522.79	2.76898	0.832409	0.491207	94.821	0.848204	0.525488	94.8891	98.3273	88.2909	0.897928	0.893396
CADLAD_336	0	1095.94	0.0555167	0.621521	0.0314934	0.081996	0.0120543	594.141	0.941384	435.309	0.944851	517.952	0.661605	118.147	0.487686	0.620222	120.741	0.204069	15.4969	155.269	0.237397	0.231469	112.584	0.538053	0.330572	0.59772	0.308332	0.0179544	33.3584	0.765254	0.591875	0.268532	0.560084	63.5255	51.8542	7.1541	102.426	488.206	3.01148	0.469868	0.18137	121.543	0.456739	0.185776	103.688	148	80.3581	0.542961	0.548639
CADLAD_337	1	959.01	0.132092	0.565449	0.146378	0.705961	0.0746977	630.355	1.0634	449.902	0.949768	467.388	0.573677	111.683	3.31389	2.45475	141.5	0.868357	17.029	108.714	0.182964	0.152881	97.8766	0.840121	0.727911	0.852307	0.720963	0.118096	23.8635	1.28873	0.80618	0.31474	0.603576	54.1801	44.0502	6.20911	86.9781	532.116	3.17433	0.790495	0.467757	91.6875	0.775726	0.453183	87.3687	97.58	73.4554	0.752771	0.828137
CADLAD_338	0	892.003	0.0664281	0.59532	0.043519	0.104674	0.0164821	282.418	1.3018	614.588	0.868503	517.68	0.461261	88.4669	0.812597	0.575396	167.715	0.207283	19.8784	153.12	0.324435	0.368023	103.89	0.706319	0.531285	0.746681	0.233916	0.0381146	31.0776	0.88682	0.569691	0.210158	0.640277	41.2883	34.7318	9.68592	65.2129	517.171	3.21216	0.672407	0.400243	80.9485	0.691672	0.272083	69.5981	87.8022	65.3567	0.744363	0.738423
CADLAD_339	0	1090.78	0.0346798	0.474667	0.041929	0.0598785	0.0167896	699.795	1.3883	533.703	0.978737	579.756	0.322541	183.469	1.57592	0.122467	197.607	0.0709334	0.83212	153.053	0.307528	0.324087	119.416	0.46439	0.248395	0.48394	0.515514	0.109507	28.4002	0.651475	0.700595	0.164444	0.521507	39.3317	23.7962	8.69752	68.3108	592.568	4.15865	0.725356	0.426289	56.7676	0.541673	0.0393493	76.1844	115.246	56.7521	0.492443	0.49247
CADLAD_340	0	1145.09	0.0718131	0.704673	0.119904	0.175346	0.05932	301.268	1.1269	522.111	0.978506	523.332	0.552694	73.1418	1.42282	1.65574	78.1396	0.683999	11.3402	174.057	0.272031	0.244873	110.783	0.661869	0.475028	0.679744	0.554287	0.158156	27.9934	0.531977	0.483753	0.120256	0.610773	55.7274	49.0001	7.45062	74.8946	539.922	2.81139	0.873287	0.480959	76.8748	0.682279	0.29356	73.5936	84.1073	60.1432	0.715077	0.715882
CADLAD_341	0	898.455	0.155934	0.704179	0.0883313	0.147108	0.038886	606.048	3.07549	564.803	0.926509	456.243	0.602856	121.1	2.19042	1.99286	169.082	1.08216	7.02001	150.023	0.348232	0.335079	84.8857	0.951189	0.909768	0.949532	0.460674	0.151501	29.1986	1.23471	0.660635	0.371701	0.81586	44.4142	38.8077	9.0655	59.2777	508.393	1.67157	0.894517	0.811413	64.4512	0.947737	0.792835	72.4749	73.5857	70.6517	0.960127	0.934478
CADLAD_342	0	914.587	0.0485637	0.6224	0.172178	0.26537	0.0712921	773.261	1.80365	463.902	0.967081	647.876	0.480033	137.757	0.558097	1.99947	190.363	1.20049	13.3026	229.02	0.346936	0.335032	122.003	0.441172	0.182469	0.380444	0.482361	0.159155	22.0617	1.05276	0.667559	0.432626	0.755319	37.8938	28.9878	11.6594	61.5521	606.726	3.63354	0.621913	0.232165	71.9815	0.590148	0.107411	71.5142	87.4571	51.3684	0.587355	0.541864
CADLAD_343	0	1053.06	0.0450634	0.515615	0.0281716	0.0637683	0.011096	286.532	1.0699	521.718	0.994094	514.905	0.60968	121.693	1.53827	1.64713	209.052	1.29604	9.50636	216.327	0.34716	0.315925	84.698	0.897581	0.832921	0.920072	0.355922	0.167607	30.3188	0.352066	0.280619	0.0614978	0.349813	52.1363	35.7529	7.28229	101.744	522.43	3.11177	0.5661	0.245744	111.116	0.579012	0.285542	93.7752	129.083	78.1532	0.60545	0.560546
CADLAD_344	0	1042.73	0.0802372	0.599673	0.152145	0.26787	0.0580919	794.365	4.20293	573.265	0.95985	332.273	0.587601	108.514	0.343229	1.2906	33.4453	0.534187	8.11013	40.3934	0.195061	0.142723	89.3953	0.957324	0.928876	0.968404	0.495576	0.250743	28.7247	1.11833	0.774252	0.399129	0.567732	25.9009	19.7149	26.5486	27.586	677.501	2.70314	0.777239	0.315407	43.2051	0.778373	0.493463	6.36423	6.8377	5.92452	0.866448	0.907236
CADLAD_345	0	1040.02	0.163418	0.735287	0.160277	0.343944	0.0850083	620.972	15.2898	604.625	0.965909	391.267	0.388165	76.3614	0.120491	0.284549	118.701	0.189028	2.16852	99.2965	0.235296	0.237535	85.2437	0.913481	0.907219	0.936557	0.433304	0.154056	34.4358	1.67387	0.724802	0.441673	0.637521	54.2396	47.1099	29.0427	26.3763	678.591	1.80951	0.741278	0.519456	56.8008	0.790483	0.469403	61.7718	66.8509	58.5976	0.876542	0.836607
CADLAD_346	0	1071.82	0.193178	0.775093	0.530328	1.66769	0.235553	714.352	1.89467	456.76	0.903994	414.434	0.739922	82.5049	0.0452115	0.330638	117.849	0.0629555	3.01224	171.451	0.350873	0.354584	97.7007	0.898334	0.798589	0.914245	0.581746	0.16257	43.7476	1.49548	0.565712	0.390627	0.781009	58.0215	54.9185	6.1868	88.4537	539.556	1.67506	0.897879	0.747004	110.09	0.876626	0.585064	119.563	121.255	109.661	0.904383	0.868858
CADLAD_347	0	844.936	0.0830825	0.628382	0.149608	0.200787	0.0543488	839.247	1.17135	436.048	0.826717	467.082	0.359084	115.927	2.72048	3.2954	239.951	1.05332	7.75272	131.007	0.236683	0.238914	120.415	0.478505	0.214393	0.457869	0.44506	0.0779849	23.8722	1.2099	0.724086	0.378803	0.433524	46.4432	31.8594	10.3634	78.3425	565.73	2.80357	0.514687	0.281154	72.2246	0.654484	0.285679	96.9688	129.209	85.2617	0.659876	0.626952
CADLAD_348	0	759.626	0.125858	0.65709	0.0397012	0.0471868	0.0251517	762.123	2.47298	594.4	0.953248	583.205	0.603328	152.272	2.2804	2.37624	211.044	1.61121	6.7913	150.277	0.257352	0.23675	102.393	0.626959	0.421968	0.656222	0.347239	0.0573766	29.4373	0.839926	0.573799	0.223544	0.607223	80.1268	74.3861	6.24026	96.0199	600.457	1.51344	0.921892	0.872801	90.1981	0.835681	0.553934	116.166	117.849	111.232	0.943854	0.967535
CADLAD_349	0	1089.26	0.104417	0.698573	0.0483851	0.0895785	0.0314223	299.29	3.37794	513.637	0.965622	496.807	0.00389188	89.4529	0.0841743	0.171037	121.693	0.0739433	0.68169	173.125	0.335169	0.339284	97.4884	0.778417	0.618289	0.849713	0.327495	0.134556	40.1784	1.34721	0.698924	0.692646	0.753974	53.6972	49.0976	9.25043	63.3465	592.67	0.411247	0.942025	0.473376	90.3825	0.827867	0.545153	87.7561	106.788	81.5223	0.763401	0.755883
CADLAD_350	0	809.778	0.0792095	0.551829	0.051926	0.0827341	0.0362395	337.09	2.0134	490.245	0.978035	449.93	0.627907	147.401	2.32578	2.69668	213.025	1.54794	10.9406	188.358	0.360547	0.309636	92.0984	0.913117	0.841984	0.949582	0.468163	0.16018	26.878	2.64398	0.770041	0.49684	0.690294	51.1841	44.8783	10.9269	51.1735	561.03	2.02643	0.853185	0.707823	79.063	0.677642	0.385323	75.5239	83.3833	63.9318	0.766722	0.773517
CADLAD_351	0	815.346	0.105808	0.749097	0.138644	0.289333	0.0958637	368.742	1.02525	504.959	0.956874	552.94	0.723689	152.102	1.76606	0.149835	174.016	0.0651883	1.40992	198.53	0.487058	0.46727	104.436	0.609736	0.37235	0.594416	0.261737	0.0725527	27.6591	1.43489	0.702025	0.548079	0.763314	60.1584	53.6261	6.30605	91.7583	562.511	2.21369	0.84325	0.494347	126.512	0.876983	0.407099	144.343	148.769	143.223	0.962718	0.940284
CADLAD_352	0	1035.14	0.0489157	0.587676	0.0227462	0.0386021	0.0132146	707.82	1.19563	456.985	0.895813	516.775	0.636341	113.986	1.30604	2.77779	131.709	1.61084	7.05101	163.639	0.249462	0.225977	110.917	0.535162	0.254659	0.461444	0.502884	0.0738511	30.1702	0.942347	0.723842	0.218999	0.547955	48.8115	34.1308	7.43627	90.77	545.694	2.92289	0.654058	0.536453	103.832	0.619685	0.340777	91.8183	102.256	76.9547	0.752569	0.792209
CADLAD_353	0	902.367	0.0952917	0.709862	0.18147	0.323454	0.0677849	352.226	1.12283	518.606	0.879497	414.089	0.719571	99.9459	1.96142	3.25758	108.257	0.916687	10.4249	128.3	0.202101	0.195863	112.537	0.559961	0.314768	0.547022	0.297398	0.0633531	34.9252	0.910244	0.440417	0.223557	0.540412	56.232	38.6744	6.57592	112.493	536.079	3.7255	0.518323	0.258188	107.406	0.654733	0.48477	79.5513	124.514	55.3198	0.444284	0.484069
CADLAD_354	1	689.399	0.366228	0.862761	0.469746	0.824399	0.387511	295.623	1.41447	519.581	0.955753	531.102	0.796527	214.909	2.35631	2.32114	258.997	1.36952	5.69423	273.345	0.498751	0.506258	87.6434	0.907092	0.86573	0.929149	0.742963	0.197791	65.914	1.32303	0.759931	0.752907	0.876634	102.053	96.6215	4.86039	105.051	497.347	2.04743	0.918118	0.641848	148.239	0.952557	0.687736	181.809	194.648	172.212	0.884736	0.874677
CADLAD_355	0	918.503	0.141429	0.45084	0.102453	0.150162	0.0432185	287.264	1.54092	422.09	0.961856	517.304	0.310441	102.413	0.937039	0.758026	130.966	0.335985	7.71016	130.615	0.235372	0.203651	119.836	0.601286	0.346731	0.588619	0.397026	0.12314	36.4885	1.15001	0.60614	0.341404	0.455221	35.0379	21.6754	14.785	49.7511	529.862	3.18081	0.457297	0.149018	59.3269	0.604195	0.286718	43.4821	55.298	34.9279	0.631631	0.571923
CADLAD_356	0	887.36	0.0444532	0.152841	0.0570082	0.121063	0.0136424	293.091	1.46718	410.099	0.984621	607.598	0.267787	91.1138	0.700671	0.421807	69.459	0.247729	21.828	131.082	0.297294	0.252013	120.539	0.466098	0.192819	0.410414	0.333908	0.211043	34.185	0.332841	0.36589	0.125515	0.404798	47.2724	32.1165	8.13502	80.5721	494.965	2.89398	0.574472	0.528609	97.5836	0.358223	0.158104	72.3452	112.481	48.1022	0.427649	0.369192
CADLAD_357	0	1015.81	0.0675478	0.640323	0.248989	0.407219	0.0853264	259.051	1.57903	570.343	0.949677	415.669	0.500063	186.451	0.0730896	0.13056	248.341	0.0517285	0.490181	214.062	0.474869	0.481187	105.528	0.76007	0.645688	0.836969	0.438839	0.25148	25.0346	0.490269	0.314993	0.104132	0.49354	40.6481	36.4075	11.8792	70.8642	583.943	2.84813	0.532491	0.216711	74.6179	0.615136	0.224041	105.203	115.114	92.0394	0.799552	0.786845
CADLAD_358	0	1020.63	0.0762388	0.553205	0.142108	0.274575	0.0834197	320.12	1.03675	462.955	0.932645	549.788	0.470664	97.1521	0.97236	1.65957	226.181	0.776616	14.3781	152.075	0.252569	0.26518	110.24	0.675871	0.490251	0.723111	0.524686	0.228414	32.4506	1.20172	0.403313	0.291211	0.54225	46.2774	42.243	9.33433	64.1954	541.992	5.3493	0.541975	0.102603	80.2971	0.540039	0.129802	69.819	95.7569	58.2761	0.608584	0.577399
CADLAD_359	0	917.956	0.108204	0.571014	0.0125911	0.0308311	0.00717402	283.506	1.20615	402.454	0.916754	521.608	0.594891	159.724	1.10425	1.13037	199.967	0.783196	9.01013	196.047	0.338619	0.34639	104.17	0.881514	0.823391	0.908643	0.353452	0.093921	46.2802	1.94791	0.703426	0.614794	0.476155	66.3232	51.2044	8.43432	95.4444	547.484	3.22183	0.526256	0.242862	116.241	0.445313	0.122342	105.224	150.315	82.4154	0.548284	0.484465
CADLAD_360	0	873.91	0.052958	0.654608	0.0325228	0.0612249	0.0153761	793.347	0.923854	453.845	0.959566	501.691	0.581798	163.036	1.31269	2.22299	195.082	0.921895	14.6623	192.41	0.335467	0.320393	88.9094	0.800028	0.668468	0.84279	0.492671	0.0331345	37.7258	0.645324	0.406357	0.210471	0.661375	61.8071	52.4876	5.57006	109.618	496.091	2.52102	0.717867	0.356435	130.74	0.753667	0.653771	119.285	141.952	104.674	0.73739	0.691244
CADLAD_361	0	970.541	0.0691725	0.560694	0.0128324	0.0234345	0.00652795	290.366	1.87012	556.645	0.976637	572.899	0.59153	149.449	0.512211	1.11005	106.707	0.525554	13.2089	141.415	0.270343	0.297803	114.191	0.689944	0.493096	0.695759	0.346196	0.152774	23.7161	0.557755	0.34682	0.0927661	0.49666	47.8434	39.7283	14.2692	48.8098	544.031	3.59023	0.552963	0.253381	60.1031	0.700766	0.402871	59.7861	72.6669	50.5969	0.696286	0.72246
CADLAD_362	0	1074.34	0.0780559	0.569276	0.0747199	0.152997	0.0172973	314.46	0.935458	445.581	0.890098	472.782	0.703827	101.51	1.3832	4.39351	159.48	1.18989	12.9319	123.327	0.201866	0.184354	105.746	0.789723	0.606233	0.764596	0.321226	0.00949527	29.1375	1.1119	0.494443	0.250385	0.928318	88.1151	83.8306	6.29908	88.6056	562.155	3.29389	0.84252	0.291384	126.774	0.699919	0.484804	97.6785	102.479	86.5227	0.844297	0.814187
CADLAD_363	0	1016.41	0.0787391	0.494201	0.236109	0.435266	0.0669765	344.03	1.03632	441.808	0.900975	555.265	0.572637	99.0957	1.34424	2.23915	217.742	1.9772	13.3046	236.833	0.397514	0.349782	108.672	0.718369	0.536673	0.768706	0.32441	0.163745	27.6143	0.525109	0.400973	0.120889	0.467908	58.0426	43.3838	7.30367	95.7149	498.218	3.85383	0.556238	0.23714	123.017	0.530796	0.313466	92.3259	125.552	71.2648	0.567611	0.569652
CADLAD_364	0	1014.9	0.110492	0.795576	0.033323	0.108272	0.0204103	315.344	1.47139	530.939	0.967456	519.404	0.631864	104.113	1.57654	1.59679	145.949	0.922111	8.06715	155.425	0.299956	0.304784	92.4671	0.83788	0.697487	0.860375	0.312303	0.0237804	31.6071	0.933942	0.472077	0.308483	0.599113	61.6094	49.9973	6.6206	97.2044	504.746	2.44601	0.709576	0.564941	105.934	0.714976	0.517002	98.5604	132.849	88.222	0.664077	0.698875
CADLAD_365	0	741.125	0.147104	0.581259	0.0588894	0.0934003	0.0224573	555.342	1.82009	441.485	0.94387	642.521	0.726361	209.604	2.94011	2.12281	238.179	1.59026	9.31707	207.354	0.313907	0.301121	89.9065	0.858836	0.753907	0.874938	0.252668	0.0210072	33.5731	1.79148	0.659042	0.458146	0.574816	62.402	48.4593	3.90123	151.074	566.028	2.52143	0.788273	0.382698	200.801	0.835427	0.582479	226.075	238.884	219.197	0.917587	0.884474
CADLAD_366	0	1047.02	0.144252	0.724518	0.0414668	0.0753801	0.0230233	353.293	1.49051	569.322	0.925415	520.2	0.763054	189.251	3.40655	2.32566	294.394	1.60361	7.11412	218.462	0.40369	0.40012	85.9762	0.924702	0.905349	0.961254	0.537516	0.178607	27.2349	1.57592	0.746299	0.585665	0.656238	89.5732	81.4159	6.45363	84.0444	507.253	2.02428	0.873378	0.705816	101.982	0.847969	0.598885	136.246	139.17	131.453	0.94455	0.946757
CADLAD_367	1	1003.16	0.0542714	0.540116	0.325979	0.420264	0.109788	460.371	1.71304	514.505	0.872024	498.295	0.626766	132.407	1.62393	2.55235	264.425	1.33769	10.4945	130.724	0.210647	0.22818	106.62	0.73213	0.547108	0.757987	0.323408	0.315366	27.315	0.422755	0.318715	0.091816	0.349552	47.3574	39.2011	7.98713	96.6221	608.275	3.01377	0.631768	0.706445	113.816	0.446905	0.246493	77.0994	126.19	68.322	0.541423	0.517579
CADLAD_368	0	897.668	0.140697	0.822408	0.147151	0.218758	0.07903	411.015	5.27838	608.041	0.913185	370.262	0.584312	88.61	0.0783169	2.00797	46.9805	0.761177	1.39113	104.991	0.264349	0.272345	89.5175	0.757933	0.610257	0.799444	0.533133	0.142525	28.4861	0.795023	0.75006	0.269415	0.72191	37.8344	34.7735	13.8167	43.3653	513.907	1.73494	0.803131	0.580594	50.3281	0.793268	0.626348	39.2482	49.0559	29.5805	0.602995	0.639888
CADLAD_369	0	863.12	0.109032	0.658002	0.0896422	0.14615	0.0561842	314.216	1.714	433.456	0.955656	477.651	0.641035	110.625	1.78552	1.96968	198.591	1.50165	9.84155	165.761	0.308646	0.32537	111.888	0.613467	0.401732	0.664419	0.428813	0.177011	38.7742	2.01219	0.633254	0.673935	0.51475	56.9281	47.8644	7.70101	85.6665	527.114	2.34631	0.705252	0.731454	101.358	0.556214	0.276087	62.7639	83.8863	51.2409	0.610837	0.576297
CADLAD_370	1	1017.34	0.0977679	0.53908	0.618742	1.58839	0.219273	292.654	1.47953	496.501	0.978415	535.725	0.66637	118.841	2.49641	1.98621	219.953	1.26769	5.99729	212.642	0.34836	0.328206	97.1164	0.856875	0.746887	0.872994	0.548961	0.36956	42.2264	1.50369	0.577645	0.579758	0.665204	85.7646	75.8926	4.72457	122.546	524.72	2.59816	0.813387	0.462313	146.702	0.699932	0.52119	154.033	174.257	146.098	0.838405	0.812816
CADLAD_371	0	746.5	0.0786096	0.540468	0.112124	0.190895	0.0516226	523.721	1.46039	516.74	0.958153	573.953	0.367859	154.669	1.54762	1.51674	208.59	0.879478	17.6854	100.737	0.186328	0.183555	117.086	0.386466	0.0852393	0.214594	0.395249	0.0572321	22.058	1.07411	0.47144	0.138254	0.718344	37.6653	29.07	11.4853	56.4845	527.477	3.88767	0.562326	0.249965	67.8116	0.656894	0.410086	73.7924	84.7599	59.5666	0.702769	0.631337
CADLAD_372	0	900.545	0.28088	0.859846	0.123132	0.237267	0.0835607	312.517	1.9234	499.024	0.953223	437.056	0.75404	202.621	0.281424	0.298958	230.974	0.226252	0.303266	266.728	0.662617	0.688626	85.0183	0.944577	0.9198	0.944611	0.588893	0.274093	67.1924	0.819882	0.768708	0.39657	0.894565	148.998	144.156	3.24424	173.279	570.57	0.850293	0.941993	0.718864	201.493	0.96605	0.788907	200.868	215.106	192.317	0.894058	0.930785
CADLAD_373	0	1177.1	0.0860515	0.721789	0.064431	0.111191	0.0182463	314.106	1.0074	484.774	0.922367	660.969	0.567943	188.047	2.02158	1.49983	170.234	0.790505	10.4509	184.86	0.327682	0.30462	81.9165	0.961759	0.917746	0.977776	0.299202	0.025908	24.4632	0.916895	0.544644	0.201188	0.696235	60.7712	53.5555	6.59296	96.917	517.483	2.8325	0.676753	0.35418	147.161	0.827893	0.851714	154.14	158.843	141.791	0.892647	0.8814
CADLAD_374	0	1009.39	0.0678637	0.739467	0.0409334	0.0732726	0.0209371	510.676	1.20042	558.734	0.972526	400.907	0.610996	72.4214	0.0506135	0.145984	77.9031	0.0899644	6.49608	106.683	0.211996	0.213944	106.981	0.494051	0.251994	0.475238	0.521464	0.121643	34.1973	1.10109	0.594767	0.242286	0.65391	71.7343	63.6816	7.12916	76.8255	509.099	2.83027	0.760787	0.368133	113.072	0.819126	0.516763	83.1724	97.0852	79.5491	0.819374	0.777783
CADLAD_375	0	823.468	0.130633	0.682362	0.0819814	0.143717	0.046182	451.611	1.38753	561.009	0.976105	666.728	0.714246	256.955	2.11481	2.42879	369.424	1.62037	6.62502	269.865	0.381103	0.374948	85.5217	0.930115	0.866518	0.925763	0.542404	0.393913	34.7879	1.24826	0.602153	0.538937	0.831646	113.097	111.16	3.9609	137.562	512.918	1.64645	0.872584	0.915494	216.752	0.923876	0.817066	297.548	301.611	291.699	0.967134	0.948677
CADLAD_376	0	1281.17	0.105786	0.438003	0.0555512	0.119565	0.0213124	359.452	0.984605	429.87	0.896305	545.576	0.356959	147.605	2.18757	3.93812	209.314	2.5861	11.4371	190.279	0.298422	0.311142	116.703	0.589167	0.389873	0.600155	0.395692	0.0561186	24.4927	0.726555	0.456142	0.140126	0.566478	54.4443	46.7471	8.50089	63.7048	524.731	2.98177	0.76125	0.449153	65.076	0.655337	0.307401	83.8486	97.2908	72.37	0.743853	0.754723
CADLAD_377	0	925.013	0.053442	0.406213	0.0130304	0.0183847	0.0078859	305.631	1.20954	479.417	0.943529	802.994	0.592492	149.955	2.24115	2.75553	320.436	1.73265	8.14976	171.098	0.270284	0.25041	109.675	0.568533	0.285957	0.494588	0.476171	0.15528	24.6354	0.721064	0.449623	0.149205	0.629069	48.0507	39.2756	9.55453	61.409	549.007	3.23402	0.752691	0.358346	96.6832	0.821412	0.378417	158.213	172.423	138.083	0.800835	0.786648
CADLAD_378	0	1128.99	0.155764	0.805226	0.0472352	0.129144	0.0166153	373.76	1.24744	445.004	0.96949	532.373	0.604716	187.188	2.17946	1.96842	210.389	1.21304	6.1733	254.559	0.527748	0.493175	91.7232	0.88915	0.812727	0.893893	0.407997	0.127054	33.8773	1.46694	0.7811	0.690037	0.665719	67.1739	60.3867	4.48757	116.952	497.914	2.02357	0.859969	0.667188	128.417	0.895308	0.704858	160.938	176.262	155.839	0.884131	0.796633
CADLAD_379	0	1095.26	0.0845726	0.498431	0.138109	0.247568	0.0433597	405.814	1.03681	523.966	0.878383	507.018	0.259927	126.962	2.30718	2.10164	199.037	1.49557	15.1467	104.308	0.158309	0.144412	97.5866	0.934208	0.914918	0.943713	0.336105	0.165765	27.2331	1.97048	0.794389	0.569145	0.76049	50.2717	39.6281	7.63133	69.8113	467.206	2.99103	0.715336	0.348509	95.65	0.783964	0.539796	144.594	155.832	137.529	0.882549	0.878789
CADLAD_380	0	1000.52	0.0822622	0.618834	0.0805242	0.112542	0.0446421	391.054	1.1634	491.969	0.941969	537.414	0.550988	119.48	1.89908	2.12933	180.647	1.02776	10.5611	148.119	0.277645	0.270893	104.767	0.652951	0.42753	0.659159	0.500263	0.0888773	30.8263	1.77881	0.645957	0.67902	0.77346	91.4328	83.5926	4.81487	118.969	507.725	1.56929	0.857134	0.799239	130.465	0.922423	0.759696	155.811	162.814	141.484	0.868987	0.828859
CADLAD_381	0	1310.9	0.11478	0.747201	0.101264	1.23451	0.0459404	518.737	1.23902	460.245	0.883715	549.182	0.662076	124.157	2.91742	2.52157	122.558	0.89233	12.1031	148.723	0.252033	0.220403	118.097	0.447813	0.207211	0.453697	0.504045	0.0764401	38.7872	0.982727	0.557656	0.24912	0.478821	62.0024	58.4741	7.88794	76.0018	488.5	2.67145	0.744841	0.679209	101.804	0.717214	0.653972	120.683	149.233	110.443	0.740074	0.761599
CADLAD_382	0	1223.6	0.0955293	0.537535	0.103803	0.179915	0.0446562	570.248	1.37484	464.997	0.939215	512.831	0.408327	130.043	1.51907	2.08785	212.146	0.975663	16.2947	201.404	0.314809	0.285266	103.77	0.872633	0.754147	0.890219	0.501402	0.187532	30.5401	0.908608	0.510002	0.158878	0.853745	44.5095	39.0075	8.51647	68.303	536.121	2.98314	0.761191	0.422493	86.3621	0.777251	0.508581	97.3341	104.511	84.7837	0.811245	0.808421
CADLAD_383	1	1135.12	0.09052	0.698505	0.0487934	0.0773873	0.0184645	384.642	1.28866	497.522	0.92931	563.647	0.588682	187.72	2.29633	2.10183	214.063	1.3538	5.55377	261.003	0.492872	0.452713	89.0755	0.920198	0.852083	0.952185	0.377388	0.191908	36.0032	1.74988	0.777776	0.737106	0.686352	77.336	73.7137	4.02451	146.213	549.778	1.9348	0.865766	0.659631	161.834	0.878159	0.657371	175.854	198.161	170.208	0.858937	0.848004
CADLAD_384	0	881.287	0.103371	0.595871	0.246028	0.578721	0.0460081	442.184	0.97347	481.673	0.968397	484.938	0.676117	117.781	0.677194	2.29719	158.465	0.456785	12.5092	219.466	0.376932	0.387538	106.75	0.763095	0.559865	0.757154	0.392544	0.247218	25.4961	0.932986	0.437658	0.214482	0.644126	38.6605	32.3215	7.74943	76.0588	465.345	2.55437	0.637631	0.348829	87.8193	0.772108	0.3824	75.2902	87.439	59.946	0.685575	0.733709
CADLAD_385	0	1225.7	0.0507494	0.653318	0.167629	0.29295	0.0403364	452.556	1.02975	443.022	0.887545	597.537	0.320511	90.0981	1.05824	0.940312	120.001	0.238946	10.7746	150.866	0.24586	0.242049	119.176	0.565622	0.319923	0.559995	0.44494	0.153364	21.5398	1.01044	0.607405	0.224308	0.443651	35.8172	21.9624	8.82346	60.7149	486.289	3.70237	0.556925	0.175617	87.6043	0.674368	0.353022	61.4701	77.4666	44.5068	0.574528	0.566185
CADLAD_386	0	974.481	0.0987286	0.748898	0.298573	0.456111	0.0514894	533.215	0.990629	424.52	0.876805	452.632	0.679942	119.017	1.50945	2.53997	174.097	1.51188	7.33325	173.977	0.301218	0.33418	94.9129	0.885914	0.801565	0.902838	0.336725	0.0721794	33.8331	0.888096	0.570307	0.238951	0.775825	60.0491	49.66	7.40683	82.7545	530.3	3.72429	0.616215	0.241904	102.446	0.481261	0.232971	98.0592	129.086	83.7445	0.648748	0.606053
CADLAD_387	0	974.871	0.0798434	0.706087	0.105526	0.17345	0.0525743	266.678	1.21447	428.967	0.911749	527.271	0.60308	127.626	0.538265	1.32163	180.672	0.480305	7.60227	251.988	0.416404	0.42207	110.121	0.606968	0.402987	0.659397	0.328199	0.130588	31.2973	1.63451	0.585076	0.431452	0.427671	59.4402	41.9521	7.24408	100.05	523.725	3.3291	0.559529	0.404916	116.891	0.361507	0.147086	96.1287	143.703	74.8841	0.521102	0.47724
CADLAD_388	0	1264.33	0.173657	0.706945	0.269746	0.410002	0.107601	384.057	1.13398	429.316	0.926344	512.909	0.672182	132.774	1.85977	2.89662	182.392	1.25191	15.9831	121.453	0.203573	0.223734	99.3597	0.958561	0.928193	0.978042	0.652354	0.349775	23.6137	1.38249	0.501843	0.352798	0.688523	41.865	35.283	8.84426	58.7318	484.444	2.59573	0.901943	0.752076	62.1373	0.711643	0.456931	61.6921	70.6422	51.5655	0.729954	0.690238
CADLAD_389	0	670.237	0.121624	0.65277	0.0400462	0.0787915	0.0246713	430.266	1.02202	436.824	0.943583	617.655	0.456471	110.755	3.54903	1.48473	191.51	0.92806	9.5501	177.93	0.283444	0.275378	101.657	0.831552	0.716858	0.841613	0.336474	0.0357872	27.5292	0.753329	0.418026	0.125574	0.68076	49.8557	41.5936	8.53776	66.8787	525.722	3.4761	0.757845	0.409134	80.2072	0.616904	0.388877	102.679	118.11	88.2703	0.747354	0.766276
CADLAD_390	0	660.721	0.117552	0.428894	0.122491	0.321298	0.0721966	346.297	1.07803	426.91	0.923682	433.184	0.700091	128.186	2.25753	1.9603	180.56	1.35189	9.14661	142.967	0.233271	0.221743	117.935	0.525912	0.287234	0.535183	0.367442	0.165079	32.5523	0.731175	0.493408	0.196555	0.478574	47.3085	41.3989	6.97474	93.9879	541.277	3.24515	0.605724	0.402614	103.443	0.568983	0.412269	87.4562	126.891	58.7476	0.462977	0.446716
CADLAD_391	0	854.051	0.197494	0.692804	0.473891	0.711987	0.21444	399.135	1.05237	535.988	0.979566	524.748	0.754382	212.211	2.88942	1.70858	247.661	1.41286	7.45066	284.15	0.500539	0.425595	92.4339	0.91364	0.903769	0.946134	0.701622	0.371195	42.1412	1.37463	0.796072	0.570838	0.833991	82.4016	76.7801	4.59474	112.976	526.231	1.85251	0.929038	0.749268	163.359	0.936896	0.773341	228.411	233.031	225.853	0.969194	0.924605
CADLAD_392	0	1103.02	0.0309508	0.537992	0.0158013	0.056269	0.0076918	324.423	0.947909	508.487	0.942847	619.181	0.332432	179.131	1.25024	1.37413	270.499	0.675058	6.99884	179.513	0.297179	0.301431	113.588	0.411285	0.1514	0.375205	0.391389	0.0553886	29.4278	0.980975	0.570997	0.291691	0.570282	48.1178	36.0863	7.78145	89.6125	469.263	3.65402	0.569939	0.326354	112.333	0.72905	0.584386	102.457	122.116	97.8869	0.801592	0.809402
CADLAD_393	0	1022.72	0.0763869	0.598625	0.0384222	0.146186	0.0232616	276.672	1.11399	508.163	0.968037	598.568	0.684289	163.157	1.80863	0.833698	179.345	0.531628	12.4335	165.208	0.286651	0.253989	111.629	0.72253	0.525308	0.796021	0.34105	0.0810798	35.5881	0.534655	0.362164	0.127885	0.456373	53.6199	43.1266	6.52872	93.3486	507.516	3.37519	0.621706	0.322422	105.631	0.757252	0.570115	108.373	131.743	97.7225	0.741767	0.738611
CADLAD_394	0	1258.23	0.0591199	0.567684	0.0212231	0.0997253	0.0152111	567.386	1.07166	521.115	0.906155	545.647	0.627828	107.919	2.59527	2.47177	130.66	1.65022	11.8268	136.218	0.211124	0.226793	119.022	0.558919	0.330501	0.555028	0.254588	0.0133326	24.5334	0.234843	0.347036	0.105383	0.670465	51.7044	32.7792	7.39676	96.3485	501.852	3.83697	0.421516	0.211713	86.6727	0.485816	0.275387	66.0741	108.838	46.4626	0.426894	0.421049
CADLAD_395	0	1200.51	0.0544588	0.491454	0.156874	0.268569	0.11093	522.018	1.16608	482.059	0.865806	508.445	0.50317	88.9528	1.84163	1.01807	130.485	0.427653	10.578	154.656	0.248066	0.20632	95.0862	0.857651	0.678233	0.836441	0.514322	0.323314	28.0355	0.601857	0.493326	0.197551	0.516868	40.8715	28.9525	10.0367	68.6688	532.616	1.29467	0.477514	0.0997037	92.1336	0.556091	0.157505	73.1376	91.6612	57.1476	0.623465	0.665576
CADLAD_396	0	1051.96	0.171394	0.720271	0.0459853	0.103012	0.0196468	270.867	1.08903	509.929	0.922615	618.87	0.825057	257.065	2.252	2.21635	202.253	1.21698	7.45171	262.29	0.455389	0.420819	94.8088	0.908932	0.869462	0.948989	0.318236	0.0433783	35.2587	1.09515	0.790984	0.385774	0.907344	80.2289	77.263	5.27065	96.1682	491.417	2.12357	0.928249	0.636244	120.426	0.917812	0.71241	173.575	175.732	166.322	0.946449	0.899703
CADLAD_397	1	1120.64	0.0508694	0.643342	0.0514999	0.0735383	0.0293282	273.167	0.941469	420.045	0.955095	524.648	0.361208	136.804	2.25648	2.15671	216.236	1.6917	6.39879	228.367	0.381551	0.340606	101.857	0.704307	0.472498	0.663247	0.427155	0.0397189	31.8346	2.03914	0.630856	0.625885	0.569163	62.3428	60.0492	7.57373	85.6057	481.511	2.82953	0.612137	0.347706	97.3743	0.745066	0.681116	80.4455	101.364	70.8835	0.699299	0.68161
CADLAD_398	0	806.896	0.123112	0.64689	0.018796	0.02277	0.0134146	341.677	0.987158	480.426	0.936572	596.895	0.666728	216.973	2.55178	2.6965	330.233	1.64577	5.46011	299.524	0.484561	0.464021	95.809	0.90888	0.809674	0.902196	0.449977	0.121515	45.7973	1.16096	0.821897	0.617975	0.917264	80.3797	77.9572	6.50739	86.4884	501.324	2.49387	0.845731	0.464644	145.539	0.933217	0.592782	219.496	223.456	213.796	0.956769	0.941978
CADLAD_399	0	1197.67	0.159761	0.596088	0.229764	1.39539	0.0895699	610.459	1.06006	439.277	0.952103	590.918	0.671201	89.7267	1.91837	2.80439	150.474	1.73983	13.6811	175.613	0.26048	0.243353	99.1088	0.830572	0.750344	0.886458	0.346566	0.0550306	25.9392	0.958085	0.544714	0.234299	0.718848	49.6981	44.8401	5.7808	99.4345	500.145	2.8882	0.840625	0.482801	99.4294	0.864133	0.684393	127.162	137.176	115.932	0.845133	0.888063
CADLAD_400	1	850.667	0.099729	0.810826	0.0323765	0.0817002	0.0220079	337.204	1.20508	448.183	0.981961	531.274	0.806749	172.194	3.71739	1.8053	206.545	1.2042	6.83066	217.941	0.356457	0.375274	92.2696	0.854853	0.741296	0.893871	0.346144	0.114472	34.7673	0.995748	0.682574	0.335072	0.712706	64.4038	57.3477	4.5203	122.019	511.585	2.23073	0.841048	0.643345	141.872	0.926427	0.716448	177.706	186.738	162.725	0.871409	0.901582
CADLAD_401	0	1122.21	0.063558	0.571148	0.107748	0.182989	0.0270451	271.163	1.12664	429.067	0.959892	483.791	0.401187	123.544	1.74891	3.59238	188.064	1.85688	12.2694	113.513	0.184405	0.211475	105.507	0.747504	0.57844	0.795782	0.394896	0.0663676	33.4201	2.21388	0.515476	0.738293	0.460185	49.3656	41.6611	6.13464	100.087	563.343	2.86091	0.768851	0.577009	108.737	0.441986	0.152982	85.2494	122.309	81.5136	0.666453	0.623204
CADLAD_402	0	904.994	0.0615294	0.632686	0.146782	0.263881	0.0821105	439.24	1.06899	551.2	0.934067	503.085	0.601608	76.8615	1.38408	1.49777	70.683	0.749259	10.4733	103.729	0.165222	0.15698	104.804	0.703083	0.441764	0.634498	0.290598	0.0815405	34.6347	1.13323	0.713211	0.349511	0.705541	46.7023	30.1722	8.57541	95.7166	539.729	3.8137	0.396285	0.0659606	113.339	0.430181	0.145235	80.5795	129.342	51.9937	0.401986	0.410412
CADLAD_403	0	1058.85	0.0935923	0.673107	0.318593	0.789612	0.215164	402.356	1.48016	442.701	0.929622	564.166	0.535248	129.475	0.985091	3.27118	287.363	0.993195	9.53065	253.257	0.361269	0.343527	109.607	0.590638	0.36757	0.60417	0.559726	0.216694	37.5908	0.818455	0.675322	0.1804	0.655461	51.5494	43.1362	7.48206	86.0732	524.97	3.26344	0.686376	0.421092	94.6375	0.798313	0.498975	133.667	148.981	121.357	0.814579	0.853018
CADLAD_404	1	721.767	0.0675634	0.469459	0.131853	0.226999	0.0566555	342.022	1.01787	418.283	0.918445	599.218	0.338014	152.7	1.77882	2.42816	218.796	1.25839	17.1144	212.724	0.335334	0.314997	116.398	0.590424	0.339856	0.578244	0.426095	0.0952889	21.5009	1.19263	0.439354	0.207492	0.53701	34.1695	26.7287	7.8204	85.9193	575	3.09742	0.65109	0.572519	68.0809	0.507968	0.21548	76.5038	93.3336	65.6335	0.703214	0.625174
CADLAD_405	0	907.601	0.0798964	0.511317	0.0672234	0.162443	0.016854	312.138	1.456	502.58	0.981222	578.031	0.480512	195.662	3.15255	3.76434	190.067	0.390518	3.93217	220.554	0.422972	0.386477	113.244	0.507404	0.199321	0.401257	0.333253	0.024336	28.8864	0.780091	0.507778	0.127931	0.592208	42.8175	35.5377	9.84996	61.4601	521.871	4.18958	0.648307	0.286809	80.8775	0.694539	0.309724	79.9704	84.722	70.5487	0.832708	0.788816
CADLAD_406	0	551.645	0.0816397	0.432541	0.026982	0.11736	0.0179419	793.675	1.1219	443.672	0.940166	551.818	0.557913	102.776	2.11477	2.2983	151.371	1.59208	28.0984	162.676	0.258272	0.246445	121.602	0.45618	0.225926	0.493009	0.423436	0.0828697	29.6447	1.65851	0.649249	0.359845	0.455663	54.3278	48.5772	8.89249	95.1793	482.432	3.72858	0.421068	0.330176	113.976	0.432177	0.16282	87.7519	130.843	68.9171	0.526716	0.549604
CADLAD_407	0	982.828	0.149691	0.650918	0.327858	5.43664	0.114318	283.724	1.18699	483.517	0.857278	507.011	0.756434	189.227	3.16867	2.74871	287.011	1.25351	12.5577	159.578	0.252911	0.256697	108.925	0.471262	0.206884	0.420514	0.588035	0.257978	56.8312	1.23617	0.696768	0.451579	0.8807	62.7709	59.8903	5.3959	103.264	526.268	2.65974	0.867347	0.500058	123.582	0.819075	0.514136	163.865	178.785	155.659	0.870649	0.792745
CADLAD_408	0	1204.58	0.0862499	0.646837	0.212022	0.456892	0.0648455	596.466	1.19753	445.799	0.992598	601.552	0.396805	92.9466	2.2177	2.04304	143.438	1.25146	8.73456	149.654	0.254971	0.246883	119.678	0.508842	0.210232	0.409461	0.438248	0.189853	24.2167	0.681192	0.47195	0.125894	0.628149	41.5078	33.5361	10.8622	52.7998	503.261	3.56887	0.693433	0.330014	72.9759	0.507225	0.0291769	53.8343	66.3018	43.5644	0.657062	0.605674
CADLAD_409	0	1003.79	0.0604083	0.301084	0.12302	0.216362	0.0477025	623.542	1.19375	472.538	0.912591	515.828	0.39346	100.442	0.103946	0.143503	111.449	0.0702611	10.4018	145.759	0.26931	0.284989	93.3095	0.913532	0.807965	0.888268	0.408641	0.0845485	33.3118	0.429986	0.389691	0.154213	0.727837	52.3394	35.1056	7.21919	90.373	507.721	3.62677	0.532794	0.30842	82.2473	0.655986	0.310523	75.8129	101.482	67.8196	0.668293	0.640926
CADLAD_410	0	692.116	0.106869	0.635557	0.18953	0.339093	0.0994993	455.516	1.08693	419.761	0.939007	535.444	0.544734	142.443	0.730403	1.21389	183.94	0.695343	11.4906	135.629	0.202932	0.205284	104.22	0.648357	0.405471	0.615915	0.293963	0.147633	37.6659	0.342181	0.381205	0.109435	0.514063	57.2894	44.8197	6.91771	96.6083	486.345	3.46707	0.527261	0.236128	137.255	0.580552	0.312576	120.613	150.993	112.277	0.743588	0.730861
CADLAD_411	0	1046.84	0.14005	0.628436	0.101912	0.174499	0.0342448	313.086	2.14384	566.415	0.833583	428.315	0.669046	127.348	2.69494	2.29389	155.619	1.70665	14.4143	79.0379	0.157301	0.141719	106.875	0.720748	0.53884	0.734544	0.30896	0.0985297	32.5809	0.823873	0.352757	0.221025	0.760671	48.206	43.7185	8.49221	78.8164	529.383	2.53012	0.70117	0.690194	76.844	0.63191	0.388942	78.4658	96.6433	64.5131	0.667539	0.623001
CADLAD_412	0	1066.38	0.134186	0.547396	0.0452608	0.150697	0.0185547	369.648	1.27769	429.467	0.962188	596.591	0.800955	142.64	1.71382	1.74221	231.576	1.08565	7.26447	254.588	0.421155	0.389471	82.1263	0.930856	0.925605	0.966767	0.492862	0.177754	29.5016	1.13183	0.680638	0.384257	0.665796	74.049	63.3957	4.52918	129.525	560.752	2.11214	0.790263	0.523683	140.216	0.792828	0.505078	152.679	169.547	130.532	0.769889	0.685225
CADLAD_413	0	1109.97	0.0786558	0.329758	0.0385569	0.0570107	0.0208192	319.23	0.993642	496.427	0.977578	505.72	0.608457	205.274	3.45287	3.21458	309.385	2.17863	6.35572	274.961	0.445598	0.437794	111.748	0.677363	0.442805	0.650863	0.444969	0.158322	32.7594	1.78399	0.734565	0.483819	0.625753	56.9986	47.2232	6.21611	90.4466	539.961	2.26478	0.846039	0.603272	97.7821	0.723514	0.312566	144.986	152.466	133.614	0.876352	0.878798
CADLAD_414	0	1067.29	0.222228	0.751145	0.055401	0.0829302	0.0247861	256.933	1.12732	469.025	0.953868	613.04	0.600248	270.124	3.12907	2.3412	281.871	1.70527	5.78665	262.651	0.495311	0.462116	101.81	0.885952	0.820268	0.878115	0.28709	0.0847568	47.592	1.12144	0.645474	0.293534	0.493404	72.4606	65.8196	4.93919	120.266	481.641	2.34179	0.723811	0.465414	179.803	0.952283	0.897296	209.416	210.868	205.551	0.974789	0.952351
CADLAD_415	0	1167.37	0.0749076	0.694219	0.0351315	0.186171	0.00840274	283.039	0.980185	438.688	0.899845	523.025	0.511103	199.294	1.28869	1.84864	179.509	0.850979	8.95238	179.951	0.334447	0.323175	114.198	0.547403	0.274929	0.505058	0.333244	0.0476018	31.5047	1.87053	0.513707	0.498741	0.790397	49.9195	42.8922	7.35488	76.581	497.426	2.49604	0.732502	0.503853	170.9	0.793225	0.568167	115.051	121.289	104.561	0.862086	0.849562
CADLAD_416	0	816.557	0.0627812	0.715343	0.995761	4.23327	0.44277	514.749	1.60759	551.519	0.95948	533.05	0.639031	64.3318	1.13133	2.00503	155.315	0.710782	12.827	185.14	0.315284	0.253056	116.5	0.541201	0.277849	0.477827	0.314704	0.201249	21.3637	1.64415	0.714982	0.428455	0.568309	40.4535	29.5525	8.23282	74.3598	529.257	2.55613	0.693495	0.383591	77.8337	0.565447	0.295345	65.1799	77.1921	52.8858	0.68512	0.644193
CADLAD_417	0	1060.04	0.0797278	0.614583	0.173067	0.385114	0.0982952	348.502	1.78103	422.339	0.967135	459.244	0.618451	99.0563	1.07608	0.900305	106.56	0.357429	13.1926	114.023	0.169782	0.161946	111.324	0.57626	0.360265	0.62103	0.364415	0.266364	31.5852	1.30781	0.51934	0.368303	0.4639	53.5432	42.4453	8.27633	81.6256	533.646	3.06241	0.695212	0.480428	101.05	0.603912	0.269056	111.086	146.418	100.803	0.688464	0.633905
CADLAD_418	1	954.324	0.0766894	0.730532	0.134489	0.21566	0.0373507	273.588	1.19082	444.687	0.938215	571.844	0.629603	136.172	1.43619	0.926105	125.404	0.456919	8.7399	139.66	0.209123	0.214342	85.425	0.938091	0.910714	0.97065	0.355802	0.276638	35.8935	2.37066	0.56477	0.730106	0.487198	48.8515	38.9911	9.85271	82.202	530.221	4.0135	0.424904	0.179604	102.696	0.715378	0.631941	85.7337	125.573	69.7148	0.555172	0.495895
CADLAD_419	0	1134.51	0.0678507	0.610939	0.0302432	0.0560708	0.0171454	385.802	1.46477	531.602	0.968642	566.361	0.708443	103.13	0.153838	0.340955	173.826	0.147932	4.47017	117.29	0.230562	0.252029	106.444	0.836022	0.627795	0.830965	0.502178	0.220943	30.4431	1.8054	0.785142	0.610956	0.788114	57.4119	55.6444	8.24159	76.5073	590.114	0.408515	0.834319	0.690484	78.4409	0.876982	0.57159	74.1016	80.5747	70.3487	0.873087	0.847096
CADLAD_420	0	1000.99	0.0405253	0.495814	0.0152381	0.0218205	0.0110754	599.885	1.32625	419.71	0.965	574.46	0.373403	96.1888	2.30352	2.15022	308.843	1.72552	8.64799	184.823	0.291534	0.321789	102.69	0.863881	0.760457	0.899627	0.347678	0.0790635	32.3749	0.478848	0.453287	0.171896	0.567852	57.0907	40.6948	6.27775	108.829	488.159	2.95223	0.602336	0.460355	113.102	0.412392	0.158795	86.7439	120.283	67.3073	0.559575	0.493077
CADLAD_421	0	983.979	0.257552	0.890122	1.19686	4.41879	0.698278	484.008	1.57814	487.2	0.949474	515.668	0.821581	218.665	2.89246	3.08124	258.047	2.03226	6.12114	253.892	0.477618	0.464005	98.9723	0.793315	0.609575	0.771319	0.538923	0.0844038	33.4798	1.42909	0.701799	0.521256	0.810799	98.5003	93.7522	3.03232	176.057	532.864	1.53794	0.906912	0.882672	221.439	0.941639	0.725764	226.498	239.961	221.679	0.923812	0.933928
CADLAD_422	0	1033.29	0.0846141	0.57895	0.0987595	0.274935	0.046201	271.527	1.14738	430.9	0.829105	532.479	0.420189	132.761	3.17216	2.9782	271.564	1.74098	8.57195	186.826	0.310506	0.275008	84.0522	0.96465	0.953915	0.971399	0.429969	0.0371718	38.214	1.32081	0.694934	0.459372	0.651143	47.8696	37.8392	6.15948	86.5445	543.32	2.62545	0.895107	0.577967	117.823	0.820913	0.481856	130.73	143.606	124.968	0.870214	0.830578
CADLAD_423	0	1420.1	0.110865	0.422866	0.561972	0.868632	0.350696	424.138	1.21712	447.156	0.935787	610.895	0.575421	157.062	0.838355	1.62197	261.837	1.25338	8.41625	260.512	0.399175	0.345122	105.582	0.370936	0.100036	0.261593	0.475246	0.0773788	20.3098	0.527485	0.466389	0.0887125	0.716133	52.3881	42.3851	6.36415	91.0569	573.248	2.49058	0.876251	0.658673	82.3907	0.783691	0.45725	97.2683	109.936	82.8291	0.753431	0.725705
CADLAD_424	0	975.771	0.134099	0.667646	0.235717	0.339558	0.0789278	386.031	1.0896	544.404	0.980273	484.657	0.664748	97.2629	2.07737	1.61957	179.197	0.995647	9.55756	183.858	0.322032	0.281839	94.9019	0.912421	0.856509	0.921919	0.399845	0.141352	38.4337	1.62483	0.650871	0.51545	0.60083	86.7341	78.9562	6.655	103.391	517.441	2.32655	0.639553	0.347872	111.826	0.666074	0.319187	109.685	129.262	99.5506	0.770146	0.743915
CADLAD_425	0	926.204	0.167811	0.700178	0.0661808	0.0993026	0.0200004	698.728	1.0652	421.198	0.967736	606.082	0.590094	227.551	1.92696	2.18003	345.713	1.58135	8.66465	212.757	0.29862	0.296715	87.3771	0.888824	0.847346	0.928098	0.334958	0.0779037	34.062	0.602684	0.389871	0.155424	0.776065	95.5841	88.5592	4.87031	127.349	572.697	2.73108	0.785667	0.243401	128.692	0.660141	0.353232	190.404	193.648	185.089	0.955801	0.938651
CADLAD_426	0	944.963	0.109142	0.681749	0.0421547	0.0607857	0.0184872	298.817	1.87516	410.427	0.978187	581.274	0.529972	216.267	3.18738	1.6032	307.659	1.11472	9.61665	174.297	0.270089	0.266222	101.879	0.625249	0.420926	0.66903	0.449586	0.121117	35.5483	1.1921	0.632793	0.60984	0.727532	75.7843	72.2183	5.09325	107.019	514.581	1.99367	0.887721	0.704453	106.904	0.839868	0.498087	146.185	153.124	138.223	0.902685	0.909478
CADLAD_427	0	1321.85	0.10319	0.61358	0.0829837	0.205225	0.0294582	349.211	2.23063	521.859	0.973324	494.212	0.565783	96.1042	1.67251	1.49411	82.383	0.656884	7.26047	123.412	0.240029	0.239158	135.606	0.904169	0.821224	0.846427	0.400112	0.0228662	23.9437	1.05814	0.620229	0.292383	0.576246	37.7767	29.3432	9.58839	62.4751	576.723	0.692896	0.821447	0.354543	60.4066	0.601317	0.149062	55.3974	69.2343	41.3977	0.597936	0.588906
CADLAD_428	0	808.586	0.111657	0.693223	1.05804	2.18746	0.474381	338.315	1.49235	528.368	0.963721	461.896	0.689535	100.158	1.96644	2.76719	172.095	1.70386	8.23148	144.574	0.242918	0.221341	112.266	0.719811	0.517182	0.707404	0.497302	0.165399	29.6526	1.52386	0.655355	0.361912	0.577261	65.7701	53.1221	5.0111	109.744	512.894	2.27268	0.839471	0.706263	117.674	0.627188	0.452244	104.982	146.369	84.7575	0.579067	0.514217
CADLAD_429	0	921.402	0.0788343	0.545973	0.0701314	0.14419	0.0283542	263.135	1.68368	428.35	0.926794	539.151	0.37885	210.366	1.50621	0.181687	313.485	0.128041	2.73488	308.779	0.524787	0.492468	97.9312	0.878086	0.841664	0.919038	0.465797	0.187116	31.3626	1.17115	0.65199	0.406964	0.670358	81.5945	76.9261	5.25132	116.705	612.502	0.374386	0.92706	0.733681	86.8067	0.78088	0.477848	81.365	90.8836	70.4837	0.775538	0.775172
CADLAD_430	0	1086.49	0.285627	0.811021	0.678667	3.59372	0.326749	334.575	2.17947	544.819	0.889157	495.95	0.757852	174.045	3.73212	2.94087	222.323	2.17821	6.4537	292.649	0.680437	0.669054	85.922	0.93897	0.874351	0.922576	0.500869	0.357674	54.5724	1.26942	0.878541	0.741733	0.951504	116.971	115.123	3.06564	174.419	509.645	1.4118	0.928	0.790389	181.39	0.970567	0.843086	212.964	220.527	212.043	0.961532	0.948897
CADLAD_431	0	1143.75	0.106999	0.656175	0.0272288	0.0648595	0.0163901	286.908	2.38478	482.281	0.922638	467.665	0.745248	153.82	3.12704	3.04584	146.059	2.15905	7.9827	135.409	0.293126	0.270697	96.2242	0.836127	0.82831	0.912709	0.559885	0.0608325	17.4529	0.608087	0.359429	0.203014	0.575298	44.434	41.0577	7.82694	73.0055	603.142	2.34216	0.786097	0.145374	88.3138	0.809007	0.229958	84.0673	96.6101	80.6089	0.834374	0.724513
CADLAD_432	0	992.512	0.104431	0.658873	0.177575	0.290058	0.0870823	445.6	1.30918	485.741	0.96999	546.876	0.638372	136.628	1.03016	1.80755	165.303	0.656037	10.8721	198.136	0.327922	0.29473	108.806	0.616691	0.367249	0.61256	0.510439	0.131091	30.8569	0.781588	0.623431	0.146882	0.903317	60.7169	54.0617	5.97191	85.182	505.921	2.47797	0.939238	0.582324	90.5514	0.819702	0.509989	114.231	124.563	105.531	0.847209	0.828052
CADLAD_433	0	1042.76	0.0364647	0.616558	0.15078	0.348967	0.0504179	372.15	1.07081	490.623	0.74823	531.929	0.449617	148.5	1.79701	2.29738	232.545	1.068	16.3643	116.14	0.188309	0.180562	111.42	0.445589	0.177157	0.404127	0.541607	0.0508635	30.1689	0.49143	0.605828	0.254731	0.781386	61.5624	55.1532	8.01998	77.7698	508.612	3.01031	0.701709	0.346826	125.427	0.734638	0.316535	94.1151	113.571	83.2178	0.732739	0.751983
CADLAD_434	0	976.123	0.119515	0.645406	0.0440724	0.0783975	0.028777	314.885	1.22284	436.531	0.974621	537.711	0.747286	235.707	3.00278	1.98031	229.037	1.22641	6.04895	253.815	0.48027	0.504703	86.5638	0.947101	0.90331	0.972636	0.494506	0.0835597	34.9529	1.00408	0.69133	0.30789	0.952693	93.7227	90.097	4.94696	104.907	486.136	2.13413	0.920321	0.542957	117.085	0.839176	0.682474	189.721	199.346	182.712	0.916561	0.903378
CADLAD_435	0	881.762	0.134298	0.592522	0.3004	0.726804	0.154719	332.032	1.31292	582.889	0.947547	507.532	0.680177	105.175	1.24613	2.0005	181.266	0.784033	7.63772	225.536	0.403711	0.403681	96.5798	0.801899	0.682778	0.880367	0.492761	0.150733	27.4896	1.49752	0.782134	0.613554	0.859101	66.2502	56.3646	6.13009	89.5044	498.979	2.16166	0.877604	0.595052	93.2322	0.857049	0.3919	114.875	123.186	108.564	0.881302	0.870744
CADLAD_436	0	1210.38	0.0621451	0.469441	0.0307054	0.0374814	0.0129276	362.783	1.31412	588.419	0.869271	557.354	0.440538	97.839	1.93026	1.98256	139.21	1.16798	13.0841	193.483	0.297812	0.25342	117.358	0.490708	0.217722	0.451431	0.345699	0.0104267	34.4163	1.56714	0.422247	0.319305	0.415581	62.4948	57.7488	8.76414	95.8846	636.173	3.09691	0.486168	0.475604	104.856	0.487794	0.280391	81.6837	128.482	51.8829	0.403813	0.450097
CADLAD_437	0	999.715	0.111902	0.451921	0.443492	1.77967	0.0796059	262.665	0.925397	445.87	0.965859	643.76	0.418759	147.446	2.30005	4.04358	306.88	2.36253	8.19636	208.689	0.285871	0.239317	80.0382	0.947666	0.952107	0.975285	0.59349	0.271435	34.0616	1.72441	0.667066	0.626324	0.879858	56.5248	51.6316	7.76004	71.2479	495.57	2.65453	0.754026	0.431673	91.2757	0.825073	0.703498	187.137	193.69	178.768	0.922958	0.923063
CADLAD_438	0	985.688	0.0932253	0.662125	0.0305815	0.0431889	0.0180675	353.926	1.19003	475.806	0.969225	423.724	0.570523	91.3389	0.0611837	0.0645504	94.1454	0.0346479	2.98146	154.347	0.331535	0.379205	91.9766	0.961657	0.929318	0.955245	0.375219	0.118652	39.1987	1.49928	0.572929	0.455274	0.47772	49.534	39.2786	8.43339	77.1715	541.195	1.10705	0.444374	0.0510339	107.755	0.548587	0.173083	95.4869	124.632	73.3115	0.588223	0.586661
CADLAD_439	1	1240.64	0.0636018	0.573965	0.118977	0.23394	0.030393	419.318	1.38367	495.164	0.938161	652.02	0.453261	183.849	2.58725	2.7705	280.169	1.88333	10.7457	124.114	0.188975	0.167878	110.76	0.639119	0.392386	0.633236	0.498289	0.0845613	29.484	0.404372	0.509963	0.1051	0.559371	39.9154	27.7255	9.66099	67.563	544.632	2.88301	0.651162	0.35729	98.3318	0.770683	0.41877	98.644	106.578	90.444	0.848621	0.794587
CADLAD_440	0	935.24	0.115894	0.697458	0.12208	0.275402	0.0576289	298.186	1.52137	545.707	0.956542	623.544	0.610425	157.559	1.1184	1.54085	148.651	0.882173	5.61653	252.338	0.428171	0.406972	94.9668	0.907558	0.857647	0.940527	0.395405	0.236124	33.5841	0.897452	0.518642	0.280035	0.781338	88.0936	84.41	4.5601	123.63	499.243	1.72362	0.828236	0.738261	119.478	0.849856	0.6101	134.944	155.053	125.053	0.806515	0.865967
CADLAD_441	0	1007.28	0.129298	0.701393	0.287039	0.454569	0.141586	263.811	1.23162	441.787	0.936321	541.045	0.798335	94.6217	0.483353	1.15612	112.522	0.451531	8.62865	190.702	0.308013	0.320847	104.596	0.773934	0.565898	0.754413	0.393293	0.267231	27.8384	1.44143	0.543129	0.365334	0.61116	113.558	107.935	4.80205	115.727	569.462	2.01491	0.90282	0.552985	110.983	0.767645	0.407186	94.875	124.007	83.8035	0.675797	0.651529
CADLAD_442	0	1011.2	0.10586	0.742238	0.190743	0.307495	0.0611594	312.094	1.20823	430.467	0.960149	536.346	0.649218	111.244	1.16628	1.25524	141.283	0.492855	13.9243	173.676	0.263492	0.255892	94.4417	0.879212	0.770407	0.895558	0.438984	0.122461	23.6794	0.802605	0.544319	0.242491	0.658529	54.8562	51.7955	7.47885	72.9484	492.474	2.55846	0.796639	0.497838	115.643	0.848607	0.547655	109.786	121.14	100.149	0.826723	0.82767
CADLAD_443	0	1007.24	0.0462074	0.484342	0.0832834	0.172628	0.0387199	291.486	2.08296	429.717	0.941741	421.087	0.00946902	98.4899	0.0997493	0.156075	122.393	0.0788061	0.799002	117.846	0.271101	0.277902	115.983	0.567063	0.351516	0.613389	0.428329	0.157045	31.3458	0.627469	0.380354	0.162587	0.63952	39.8453	22.84	14.3084	67.4681	619.008	5.62085	0.389143	0.0348835	88.7903	0.561911	0.0833923	59.3285	84.4254	45.5937	0.540047	0.532318
CADLAD_444	0	652.491	0.154268	0.652211	0.16931	0.407306	0.0566882	262.845	1.03829	560.469	0.817747	562.393	0.575567	179.23	0.565239	0.550278	263.004	0.194885	19.7974	179.914	0.28944	0.268975	115.445	0.509801	0.227571	0.47397	0.458077	0.175181	29.6354	1.16669	0.543224	0.275536	0.442806	42.2894	31.2382	10.4856	61.7396	572.175	5.26756	0.676228	0.141654	79.0961	0.834663	0.649328	76.1404	81.8012	66.5573	0.813647	0.850623
CADLAD_445	0	1102.57	0.0948164	0.648232	0.127878	0.218742	0.0720598	400.859	1.26611	528.583	0.961233	411.58	0.733751	97.8058	1.63979	1.62418	133.69	0.947506	8.18385	144.821	0.275118	0.298167	108.593	0.631931	0.438874	0.713173	0.518961	0.0797513	33.4956	0.973801	0.388381	0.156788	0.41789	56.4151	54.5255	8.96333	67.7873	554.717	4.07695	0.664315	0.258561	74.9582	0.632965	0.273309	80.8612	89.3807	64.8648	0.725714	0.650151
CADLAD_446	0	855.985	0.0907385	0.330593	0.315587	0.494399	0.14353	303.177	1.23954	506.477	0.826752	533.22	0.672895	127.408	3.48398	1.27811	89.6031	0.585991	2.45004	107.885	0.222953	0.217463	97.258	0.84421	0.741208	0.908351	0.301455	0.294674	36.376	0.738314	0.381227	0.148559	0.402595	46.2787	30.4802	10.3932	81.0445	553.905	1.70207	0.461743	0.0425688	95.5971	0.561088	0.158757	115.529	130.809	105.282	0.804853	0.819027
CADLAD_447	0	1083.84	0.155372	0.800112	0.665823	1.95776	0.388211	516.401	1.36936	466.166	0.866616	523.401	0.769305	212.064	2.51267	1.96707	189.972	1.03522	7.18375	216.338	0.386649	0.363739	106.823	0.642192	0.385768	0.614029	0.553135	0.277966	42.2377	1.432	0.861411	0.732855	0.789394	70.3113	64.0544	4.42971	129.848	548.487	1.76722	0.852946	0.657761	156.678	0.904696	0.654269	165.956	171.758	158.492	0.922759	0.927581
CADLAD_448	0	1078.01	0.0545048	0.587601	0.0757874	0.137864	0.0168325	311.112	1.17582	434.325	0.751384	499.231	0.585078	126.966	1.9767	0.31353	206.61	0.13416	6.42206	224.901	0.43549	0.410801	100.367	0.909722	0.860219	0.92991	0.429115	0.0946671	24.1	0.741195	0.459161	0.182319	0.757261	55.058	53.0756	9.92158	60.3628	546.783	1.92419	0.823591	0.773956	68.5978	0.704976	0.672942	58.4915	65.575	52.1287	0.794948	0.744359
CADLAD_449	0	1079.84	0.0688904	0.54797	0.0233743	0.0631284	0.0101669	333.185	1.12154	431.407	0.926976	547.169	0.742883	145.535	1.51241	3.09362	243.856	1.27326	6.48486	241.867	0.434134	0.430745	107.91	0.727333	0.504365	0.702391	0.323192	0.0394846	26.4328	1.00422	0.554792	0.347226	0.657147	96.1434	91.4962	4.13543	135.934	577.752	1.7349	0.897674	0.776005	139.99	0.795471	0.646733	178.967	202.943	161.325	0.794928	0.778528
CADLAD_450	0	846.356	0.0871472	0.488731	0.0646808	0.110035	0.0228994	411.639	1.47565	426.545	0.963338	610.867	0.348874	179.377	2.19021	2.39349	190.299	1.54249	13.3823	182.421	0.263907	0.267668	97.1185	0.893137	0.73313	0.838005	0.480515	0.0932946	28.8669	0.545649	0.823486	0.310171	0.803019	51.5698	47.0068	7.70642	72.5137	541.029	2.76756	0.869867	0.386071	155.163	0.789331	0.659757	166.257	174.568	161.979	0.927881	0.953813
CADLAD_451	0	1067.74	0.0936745	0.68627	0.0592212	0.121294	0.0247534	304.705	1.01648	573.453	0.933782	662.9	0.498175	111.828	1.3672	3.68208	202.063	1.75113	9.25304	136.369	0.223245	0.233093	111.613	0.674695	0.434141	0.650053	0.34799	0.0293078	23.9701	0.623822	0.433221	0.110242	0.509428	38.0324	30.34	8.49938	68.9893	478.814	4.35846	0.579205	0.171084	81.4588	0.768574	0.467877	107.146	122.838	102.31	0.832881	0.861576
CADLAD_452	0	1027.82	0.0771377	0.444725	0.0486108	0.0984794	0.0229664	287.812	1.10691	548.948	0.943072	608.32	0.555194	118.667	0.817561	1.38612	152.932	0.906427	9.05861	212.669	0.338798	0.29911	104.482	0.701883	0.485703	0.7039	0.600568	0.110173	34.5492	1.06194	0.611491	0.283533	0.768503	50.5208	45.8831	5.29667	95.5875	490.098	1.99681	0.898614	0.650465	128.227	0.955255	0.720651	110.316	116.521	100.756	0.864706	0.83845
CADLAD_453	0	1407.73	0.074112	0.508558	0.146087	0.232642	0.0374285	275.073	0.952126	460.698	0.842917	468.137	0.651926	106.888	1.92729	1.86363	97.1272	1.28204	12.3399	199.507	0.308825	0.255921	104.964	0.832658	0.693471	0.828727	0.396058	0.204883	24.8365	0.420142	0.424157	0.054386	0.550551	34.123	21.9911	9.0886	68.3314	545.611	4.05038	0.571632	0.210609	76.7283	0.707064	0.365869	67.2748	86.0105	52.5854	0.611384	0.652758
CADLAD_454	0	1045.92	0.177169	0.782299	0.503065	0.841096	0.133211	378.866	1.52358	488.744	0.971149	526.422	0.68693	186.678	1.63179	3.25775	212.026	1.12291	7.70755	237.187	0.419785	0.397717	86.8126	0.972054	0.949175	0.989304	0.65972	0.421033	30.1048	1.32917	0.749662	0.653164	0.938827	139.688	135.094	3.09903	176.007	538.861	1.52573	0.931689	0.790853	170.473	0.887633	0.79309	218.052	225.602	215.298	0.954324	0.95201
CADLAD_455	0	967.442	0.144755	0.567177	0.209628	0.349078	0.0829893	374.652	1.58334	510.088	0.946859	523.487	0.520618	110.381	0.630238	0.0853144	84.8851	0.0391907	13.785	107.875	0.243351	0.28412	102.312	0.942704	0.875632	0.915429	0.38565	0.152854	37.1542	0.662473	0.470101	0.204011	0.597107	60.3801	52.1177	7.12427	89.4718	536.239	2.93256	0.713315	0.410237	107.113	0.664927	0.288524	84.2321	106.375	65.5199	0.615936	0.574924
CADLAD_456	0	1028.87	0.0947794	0.7106	0.045917	0.0806051	0.0247546	393.829	2.10338	570.959	0.634243	663.615	0.630583	100.056	0.0435178	0.128627	209.55	0.0406431	2.56057	175.93	0.380575	0.353696	106.268	0.724976	0.537818	0.752142	0.438798	0.0729284	20.8451	1.00716	0.596979	0.311136	0.828714	66.1125	64.3154	9.81434	62.5081	546.198	2.70725	0.731633	0.353713	83.4032	0.820034	0.100912	95.7745	105.659	87.7739	0.83073	0.828404
CADLAD_457	0	795.406	0.130355	0.766595	0.14077	0.307356	0.0772173	428.849	1.17981	556.564	0.954983	351.248	0.877789	141.964	1.32915	1.94211	189.099	0.856523	6.29438	156.783	0.29292	0.284462	95.7027	0.867778	0.807977	0.936097	0.507694	0.243979	29.0752	0.565625	0.670221	0.209532	0.522711	52.071	41.783	8.11962	69.6809	518.269	2.78683	0.766518	0.433172	68.0929	0.743389	0.41739	81.5078	87.8979	70.447	0.801464	0.810518
CADLAD_458	0	1062.22	0.188837	0.781981	0.174266	0.251281	0.0524567	375.332	0.991622	637.024	0.951143	470.507	0.737974	118.57	1.35929	1.78808	233.558	1.00829	9.70906	138.28	0.207071	0.180137	108.062	0.732412	0.519746	0.736114	0.328214	0.075466	33.8282	1.17554	0.691558	0.348419	0.742109	50.6171	47.6311	9.17203	62.8822	526.748	3.62876	0.743318	0.292035	79.4952	0.734258	0.380331	116.025	121.981	108.799	0.891929	0.943083
CADLAD_459	0	1112.82	0.0727534	0.509081	0.0334746	0.0826007	0.0135179	512.435	1.56471	452.561	0.908899	367.032	0.507477	80.7431	0.070777	0.228297	215.986	0.10945	6.25024	72.6311	0.147519	0.170031	106.73	0.724478	0.520588	0.734535	0.288256	0.0153395	24.0914	0.238574	0.457472	0.0368441	0.498494	38.226	29.6417	11.3053	80.5232	575.78	1.24999	0.502685	0.1215	78.6479	0.683466	0.313344	102.938	113.22	95.3845	0.842474	0.774076
CADLAD_460	1	866.139	0.110672	0.636723	0.0592461	0.123255	0.0352207	480.016	1.23212	446.526	0.966042	632.063	0.737813	175.03	1.85115	2.85226	274.589	1.94413	9.76029	149.548	0.24439	0.283377	88.6942	0.949437	0.922653	0.968384	0.480787	0.219013	50.5592	0.903101	0.679203	0.252229	0.92014	133.854	126.961	3.82225	144.28	536.13	1.86771	0.882448	0.570747	165.133	0.838042	0.572214	175.562	186.764	161.194	0.863088	0.878582
CADLAD_461	0	1007.78	0.0770721	0.615636	0.0256346	0.0540889	0.0160271	288.798	1.43373	539.735	0.936503	519.327	0.576501	238.604	1.80665	2.25484	343.259	1.99441	7.11276	276.462	0.556646	0.535703	104.071	0.866593	0.777432	0.884005	0.552942	0.0841347	36.8756	1.63978	0.716103	0.522196	0.73198	79.7992	75.0767	5.5284	97.7172	529.598	2.11573	0.935374	0.64509	84.2702	0.837983	0.512785	162.431	169.81	158.557	0.933733	0.879801
CADLAD_462	0	1068.92	0.253525	0.832248	0.457042	5.05036	0.147771	344.232	2.1469	532.922	0.95112	395.272	0.683055	167.517	2.43032	2.13053	188.906	1.3628	6.92508	195.263	0.458107	0.454149	83.8885	0.981066	0.939346	0.979174	0.464733	0.300272	58.8446	1.61296	0.856688	0.671987	0.864867	113.108	111.709	4.36596	134.871	606.313	1.41479	0.913972	0.64897	173.345	0.946031	0.864036	182.359	188.359	170.438	0.904856	0.930662
CADLAD_463	0	894.667	0.0890002	0.557291	0.0380902	0.0586077	0.0209628	319.783	1.08767	498.95	0.982632	654.387	0.304889	177.803	2.97511	2.73065	215.457	1.51226	8.08581	268.768	0.462235	0.438348	110.181	0.687254	0.448632	0.658468	0.462512	0.115948	39.3333	1.71321	0.647841	0.590341	0.792496	48.7477	43.745	6.38993	82.6096	513.377	2.33345	0.83363	0.561707	141.306	0.915862	0.492036	148.39	151.672	144.696	0.954002	0.907867
CADLAD_464	0	901.321	0.191484	0.671444	0.263837	0.326614	0.192281	327.07	1.23539	497.027	0.918001	439.284	0.565911	177.951	1.71114	2.31022	268.588	1.3249	7.80714	189.163	0.32854	0.316653	92.4893	0.957447	0.875584	0.934516	0.619913	0.256895	37.2187	1.15768	0.609202	0.474043	0.837924	79.6151	74.9264	5.71008	96.8716	501.3	2.17971	0.850763	0.628134	136.301	0.898692	0.847101	119.545	128.82	114.591	0.889542	0.89387
CADLAD_465	0	1041.25	0.108364	0.608737	0.317655	0.558742	0.10372	285.103	1.38987	458.937	0.950824	570.523	0.50368	142.867	3.07628	2.68388	225.969	1.78765	7.55746	179.451	0.272048	0.258164	105.344	0.810065	0.646996	0.81217	0.483074	0.296367	31.9149	1.22456	0.764927	0.449268	0.742387	60.8097	52.7577	4.61156	111.613	508.815	1.97205	0.913588	0.748617	126.265	0.912696	0.71631	151.561	154.838	137.904	0.890637	0.871863
CADLAD_466	0	847.048	0.108019	0.676616	0.331049	0.834335	0.0821879	432.853	1.11652	430.778	0.95028	490.847	0.655449	110.373	1.42776	1.51547	216.225	0.974561	11.4966	194.63	0.340594	0.313308	84.2072	0.980816	0.96594	0.981632	0.624873	0.765175	19.6574	0.533395	0.750323	0.467751	0.917512	35.1825	33.6879	6.41482	88.4499	535.554	1.87306	0.860283	0.782237	98.5846	0.928149	0.804328	110.355	115.712	103.197	0.89184	0.915037
CADLAD_467	0	990.32	0.0934632	0.654763	0.0385037	0.123727	0.0251955	441.623	2.33652	450.631	0.880991	478.071	0.522361	151.509	1.60371	0.0689313	215.939	0.038689	8.51394	127.143	0.307329	0.292115	99.263	0.921165	0.863177	0.947185	0.59186	0.395062	29.8693	1.15302	0.705325	0.375275	0.657372	31.7564	25.7818	16.3397	50.6868	639.411	2.12825	0.657475	0.472895	86.8659	0.748599	0.624142	61.4644	67.1263	57.3573	0.854469	0.834976
CADLAD_468	1	1008.63	0.0991188	0.646533	0.0606759	0.122614	0.0383155	264.531	13.586	554.984	0.949841	193.803	0.387373	58.15	1.61677	1.47007	61.4085	1.04617	7.08585	75.8948	0.404099	0.103405	98.8239	0.807665	0.65821	0.835848	0.359682	0.0486304	20.8601	1.16451	0.715243	0.243971	0.525781	18.6059	16.3361	47.2493	15.7917	699.642	1.85568	0.762258	0.498879	20.4256	0.742151	0.430242	21.7889	22.4001	19.4078	0.866417	0.823299
CADLAD_469	0	924.998	0.102937	0.745205	0.11065	0.176497	0.0751178	331.594	1.15249	445.78	0.950008	630.009	0.602603	207.381	3.6682	2.81926	239.071	1.80124	9.59022	161.423	0.226783	0.202166	86.1073	0.894149	0.851471	0.933239	0.335289	0.185507	42.6018	1.08162	0.515762	0.392303	0.861439	101.62	96.9117	5.40324	108.943	532.951	1.63591	0.851559	0.71663	143.769	0.821911	0.577715	178.88	184.918	176.333	0.953576	0.955948
CADLAD_470	0	849.324	0.175023	0.711395	0.118131	0.143653	0.0778563	282.542	1.60562	436.414	0.89827	528.955	0.604349	244.762	3.67231	2.72215	243.68	2.1385	6.90114	201.601	0.365266	0.405484	105.875	0.758298	0.553612	0.763503	0.316903	0.0929245	49.872	1.38546	0.802356	0.718746	0.792488	80.3783	74.2031	4.21758	136.678	520.834	1.66085	0.838284	0.831107	171.758	0.836351	0.720753	180.932	183.256	178.791	0.975635	0.948579
CADLAD_471	0	725.65	0.21336	0.678436	0.899164	4.301	0.278525	590.326	2.57832	446.556	0.835439	403.039	0.678824	202.317	3.19591	3.48428	200.218	0.994615	9.82609	130.728	0.281623	0.260246	120.83	0.378212	0.122274	0.314823	0.446724	0.124452	35.1846	1.45629	0.671928	0.330068	0.577951	41.962	33.065	9.56618	82.6804	597.064	1.64403	0.576399	0.236816	82.4823	0.787058	0.808218	80.6608	98.64	65.7809	0.666878	0.584127
CADLAD_472	0	1115.42	0.119137	0.613183	0.133267	0.226207	0.0761946	509.059	1.29519	426.528	0.962256	513.89	0.601031	138.7	2.34827	1.8335	170.838	1.06732	6.43563	219.303	0.42468	0.438223	96.4279	0.803866	0.64365	0.825766	0.383726	0.0963736	36.9929	1.23551	0.552337	0.440772	0.658319	78.9645	74.3095	7.31987	93.2831	496.826	2.65917	0.641594	0.303687	122.78	0.722376	0.560815	123.93	142.156	113.222	0.796467	0.772188
CADLAD_473	0	1010.45	0.152459	0.746649	0.0371967	0.0463016	0.0224888	297.72	1.22286	433.292	0.978721	513.844	0.819754	172.064	2.89924	1.42056	174.967	0.652794	6.29843	252.309	0.410952	0.376079	81.9478	0.954828	0.954184	0.982935	0.640494	0.177105	26.7309	1.3591	0.683432	0.619618	0.751721	63.1904	60.2164	4.62135	122.184	514.663	1.74763	0.864875	0.807073	120.215	0.903153	0.801589	148.115	152.783	139.112	0.91052	0.9063
CADLAD_474	0	1057.29	0.158153	0.730248	0.374024	0.867348	0.263631	329.806	1.01652	433.6	0.955177	567.313	0.536208	154.37	1.45704	2.16254	217.421	0.713424	12.7546	204.186	0.380218	0.312498	96.7684	0.944543	0.927974	0.963872	0.541592	0.313987	22.4847	1.29672	0.46943	0.375785	0.689164	53.9113	52.1532	8.04999	72.6573	537.489	2.3671	0.78703	0.504679	93.6081	0.795209	0.550963	114.579	116.833	106.906	0.915036	0.865894
CADLAD_475	0	897.421	0.0976492	0.626208	0.132003	0.19944	0.0792407	393.412	1.44035	510.371	0.943832	489.911	0.515063	130.553	1.1673	1.41978	109.737	0.627174	8.69423	187.726	0.328341	0.298486	112.261	0.495678	0.225208	0.42439	0.315497	0.177219	33.6518	0.799725	0.493942	0.180626	0.559619	57.6356	45.7108	9.06627	90.4933	592.403	4.74472	0.489711	0.172378	114.929	0.518233	0.184865	86.8908	122.953	71.9983	0.585574	0.588223
CADLAD_476	1	986.22	0.0772025	0.611467	0.0466365	0.0734356	0.0174547	679.014	0.958329	467.282	0.906083	500.971	0.52663	196.748	1.9201	1.10348	231.321	0.677381	14.5089	284.059	0.478213	0.501008	93.3434	0.841986	0.75058	0.909942	0.804597	0.649824	30.4761	1.17809	0.749218	0.686076	0.851501	49.2636	48.4094	8.80923	62.172	481.68	1.98861	0.850131	0.786221	97.7266	0.881633	0.745614	88.6503	93.4201	82.3941	0.881975	0.864154
CADLAD_477	0	734.863	0.0585448	0.36656	0.0359559	0.0469176	0.0278764	342.32	1.14908	548.988	0.899158	505.098	0.538061	108.547	2.42627	1.90841	157.247	1.05646	8.20801	244.665	0.41363	0.359267	119.201	0.455069	0.199654	0.414184	0.394957	0.0324975	30.4604	0.840214	0.598194	0.208972	0.648724	53.3661	43.841	8.73149	68.776	559.094	4.19765	0.660154	0.206334	72.1396	0.639464	0.243994	71.007	84.1161	59.7144	0.709905	0.658831
CADLAD_478	0	994.452	0.0723406	0.618734	0.0175553	0.0266354	0.00809859	355.4	1.32412	453.252	0.918538	479.64	0.421302	102.304	1.81689	1.71831	158.719	1.34442	8.1681	244.44	0.448424	0.427297	110.591	0.600343	0.390384	0.624986	0.373243	0.104949	32.3177	1.41903	0.516696	0.374514	0.663127	50.45	40.1075	5.79148	104.829	552.253	2.54281	0.765249	0.61178	102.788	0.659448	0.41111	95.8295	116.921	82.2701	0.703639	0.658637
CADLAD_479	0	985.806	0.164917	0.762595	0.104618	0.193237	0.0392564	272.873	1.22484	427.802	0.922674	498.728	0.686291	123.866	1.72899	1.81058	287.347	1.0967	7.95289	233.468	0.413641	0.409388	93.6133	0.922694	0.896541	0.963963	0.583999	0.0822317	32.128	1.15999	0.689572	0.359802	0.945536	111.424	109.983	4.08347	137.482	498.896	1.84337	0.868038	0.729812	109.478	0.852973	0.591706	153.659	174.16	152.042	0.873005	0.867152
CADLAD_480	0	997.45	0.0719948	0.535427	0.033015	0.0494236	0.0138269	351.558	1.06105	448.083	0.970453	665.025	0.520771	157.304	1.4236	1.82557	175.347	0.906428	10.8282	221.491	0.351358	0.374244	87.8558	0.88619	0.783443	0.90618	0.388643	0.258602	32.2059	1.16352	0.528842	0.309183	0.442853	57.5903	47.4095	5.1765	119.256	530.309	2.13587	0.763683	0.492442	196.968	0.830738	0.657675	178.703	194.882	172.567	0.885491	0.88987
CADLAD_481	0	791.779	0.140603	0.589581	0.0997865	0.138343	0.0479616	468.548	1.08455	445.929	0.952057	539.928	0.68598	156.071	1.66363	2.43234	186.106	1.67906	1.81868	130.909	0.315167	0.31032	116.51	0.549778	0.30839	0.537962	0.41501	0.0764328	29.5815	2.0054	0.844741	0.577216	0.668657	49.9708	46.198	9.59305	68.4209	521.339	3.37456	0.579139	0.223027	89.6618	0.7093	0.487728	85.0557	96.9151	81.6171	0.842151	0.820852
CADLAD_482	0	799.733	0.0987325	0.676379	0.0527172	0.0986234	0.0327205	675.685	1.0495	430.48	0.956028	687.946	0.785889	185.117	4.50453	3.24174	320.958	2.06262	9.78497	135.694	0.203784	0.17414	107.883	0.663063	0.418564	0.636294	0.4228	0.0176453	24.2392	0.968289	0.573598	0.352399	0.765788	51.8323	41.3718	6.91238	80.1563	569.781	3.25996	0.843336	0.407443	118.617	0.907009	0.531046	144.384	147.018	132.734	0.902839	0.859698
CADLAD_483	0	906.587	0.0741203	0.593738	0.0163338	0.0624039	0.00938522	640.872	1.29179	473.964	0.756721	493.8	0.548881	91.3693	2.11684	1.87082	122.022	0.578958	11.2067	132.67	0.205345	0.187504	100.988	0.844664	0.685994	0.832675	0.554536	0.0157154	36.1142	0.860398	0.759037	0.243174	0.769786	60.8847	54.224	4.80649	135.552	647.522	3.29795	0.87888	0.218782	109.594	0.732201	0.404551	83.3775	90.4457	64.3091	0.711025	0.727902
CADLAD_484	0	905.956	0.125331	0.768759	0.0989398	0.261978	0.0218704	350.78	1.54445	444.205	0.947908	585.286	0.476789	188.885	2.81257	2.65369	237.774	1.70634	12.6849	234.275	0.343407	0.314234	108.874	0.633203	0.350035	0.557741	0.303598	0.0250453	34.0214	1.2444	0.693854	0.436063	0.598772	84.8225	75.1261	5.59559	110.163	527.462	2.30677	0.710158	0.46857	142.294	0.75604	0.8373	152.049	181.769	148.243	0.815556	0.787271
CADLAD_485	0	978.76	0.0579718	0.463625	0.119236	0.213436	0.0468125	358.837	1.38311	492.829	0.952934	505.976	0.519761	188.854	1.12069	2.89732	211.547	2.08854	9.37072	114.612	0.175301	0.171719	116.121	0.479178	0.197917	0.411723	0.444009	0.051312	25.8354	0.277005	0.402671	0.046459	0.688937	42.1028	30.6293	8.55082	65.5677	562.247	5.73485	0.721388	0.0916961	74.1649	0.764537	0.515774	98.9678	106.651	91.4122	0.857115	0.816278
CADLAD_486	1	816.494	0.228006	0.74681	0.0969444	0.194713	0.0640147	327.225	1.30327	473.84	0.974338	523.552	0.857425	216.123	3.03918	2.63156	268.135	1.5412	6.18283	257.743	0.420942	0.404111	91.2787	0.942076	0.924993	0.927929	0.563774	0.126154	69.1879	1.30384	0.847495	0.723003	0.922337	139.075	137.056	3.18821	181.623	549.682	1.4447	0.859397	0.804715	212.313	0.917612	0.806063	228.464	243.8	223.118	0.915166	0.936995
CADLAD_487	0	930.323	0.0917189	0.615634	0.0668385	0.10341	0.0170354	286.422	1.21646	424.074	0.940283	626.39	0.629882	89.5471	0.950349	0.612207	136.741	0.440745	10.6723	235.96	0.427143	0.481941	112.723	0.532399	0.266931	0.506477	0.271472	0.0326798	31.8803	1.12284	0.602572	0.249963	0.406317	55.6658	45.3668	5.56138	109.995	576.024	3.17972	0.759728	0.37118	133.572	0.663547	0.3234	108.914	137.128	82.6837	0.602967	0.574128
CADLAD_488	0	903.927	0.113593	0.46304	0.186246	0.354769	0.0617389	290.464	0.925298	444.762	0.970809	446.31	0.407406	71.9645	2.15205	1.67304	154.072	1.13118	17.5663	149.529	0.214614	0.196771	108.287	0.568939	0.324221	0.571103	0.300266	0.0876005	30.4398	1.20826	0.534742	0.275011	0.713168	45.6482	28.8869	8.20085	80.3069	502.788	5.01089	0.421411	0.128753	86.0886	0.604086	0.381713	78.8625	104.829	63.5187	0.605928	0.532209
CADLAD_489	0	1038.15	0.0674553	0.758796	0.337091	0.766674	0.251807	378.128	1.31547	495.644	0.957003	572.846	0.272212	103.995	4.4706	1.41296	150.145	0.58973	20.2991	127.793	0.185789	0.168975	113.985	0.523179	0.249814	0.456982	0.237644	0.0740893	29.1415	0.558083	0.396463	0.103082	0.589979	59.3673	40.8599	7.12412	86.8881	524.479	3.86089	0.56904	0.226018	99.0371	0.624833	0.224554	144.725	148.483	139.585	0.940076	0.939539
CADLAD_490	0	841.671	0.144905	0.652	0.288492	0.535348	0.117086	287.468	0.928676	513.626	0.969816	521.646	0.61502	142.24	0.92705	1.32575	165.207	0.991534	9.34439	152.814	0.23302	0.225073	97.7281	0.879153	0.845551	0.939331	0.313431	0.099921	43.8472	1.00915	0.447912	0.265271	0.620029	82.3552	66.8776	5.64192	111.101	503.898	2.75558	0.620321	0.329476	136.596	0.695295	0.448699	195.345	208.103	185.602	0.891874	0.868256
CADLAD_491	0	936.214	0.250889	0.851992	0.754837	2.00981	0.206978	273.779	1.36657	439.736	0.8905	557.181	0.780852	237.029	2.59635	2.72799	295.562	1.60557	6.83963	270.86	0.464093	0.450777	86.7717	0.920323	0.884426	0.950094	0.576331	0.137602	42.0389	0.890311	0.424334	0.326241	0.726325	63.8725	56.0372	4.17901	135.156	518.815	1.97182	0.765148	0.662711	190.731	0.801997	0.617794	206.965	225.231	195.978	0.870121	0.860772
CADLAD_492	1	871.562	0.0593807	0.645214	0.0330304	0.0609349	0.0178544	411.785	1.0437	425.429	0.984428	605.799	0.65663	132.955	1.56266	1.01481	142.909	0.659608	8.22302	211.437	0.330058	0.307675	100.913	0.72969	0.514272	0.702576	0.291292	0.0499738	41.3832	0.632971	0.535784	0.17727	0.667912	116.4	105.733	3.34046	163.738	511.039	1.76489	0.88546	0.694769	195.847	0.793858	0.569686	151.612	183.593	129.729	0.706613	0.656457
CADLAD_493	0	663.912	0.077987	0.610384	0.0903121	0.124346	0.0260463	410.087	1.05297	444.928	0.921067	577.614	0.615446	185.904	2.60606	1.71449	256.26	0.859293	7.93586	227.041	0.402371	0.386546	87.6872	0.861381	0.829731	0.792154	0.230778	0.133544	64.402	0.61828	0.664827	0.600783	0.725237	61.9348	34.3674	5.68254	114.307	665.343	10.0641	0.577032	0.143848	147.104	0.499932	0.131718	159.573	187.58	143.567	0.765365	0.68431
CADLAD_494	0	957.992	0.0680022	0.574905	0.0876592	0.125786	0.0232398	432.909	0.993296	611.269	0.859927	502.314	0.610195	124.738	0.694266	1.09319	147.978	0.733742	9.20473	240.298	0.397846	0.385927	113.246	0.60129	0.329637	0.555789	0.438622	0.0550641	26.5166	0.923536	0.545632	0.199017	0.48167	47.166	32.9378	9.20833	77.4553	517.334	3.85503	0.475874	0.171949	93.8653	0.54355	0.268624	81.2545	112.542	62.3383	0.553911	0.556926
CADLAD_495	0	950.059	0.0424416	0.402496	0.0305998	0.0546586	0.0104544	496.001	1.36084	571.115	0.924774	629.467	0.758724	189.076	0.902061	2.88683	271.471	1.74159	11.7673	215.55	0.36379	0.32491	114.517	0.495337	0.201703	0.405659	0.32518	0.0143175	30.5272	1.34834	0.625751	0.370536	0.39905	48.1747	31.3094	8.78985	86.1867	536.394	3.66218	0.468353	0.188573	112.152	0.778002	0.493574	119.425	141.419	112.743	0.797226	0.825459
CADLAD_496	1	794.127	0.209874	0.781416	0.206064	0.426016	0.0772347	335.559	1.08747	463.791	0.981643	489.586	0.900279	209.492	2.30267	2.70594	308.299	1.97117	5.02288	299.242	0.542514	0.521269	85.096	0.892391	0.787926	0.871602	0.496552	0.0977475	75.5005	1.05568	0.879727	0.531167	0.96437	145.847	137.932	2.59941	197.415	491.842	1.67553	0.941933	0.742688	206.761	0.965153	0.762597	238.33	243.224	231.486	0.951739	0.928548
CADLAD_497	0	977.634	0.0743267	0.620056	0.0929768	0.159055	0.0249008	296.582	0.955902	510.08	0.896298	546.079	0.52904	83.142	1.35332	1.53457	162.541	0.59913	11.3093	192.641	0.28443	0.261051	88.7127	0.959827	0.895994	0.949612	0.671233	0.409726	33.6736	1.5363	0.775807	0.570093	0.820279	52.7961	50.3666	6.33501	86.0511	500.231	2.22056	0.910347	0.702648	111.042	0.892451	0.656954	91.0596	104.263	88.0769	0.844757	0.845601
CADLAD_498	0	1223.57	0.064922	0.584203	0.110923	0.236284	0.0260165	306.748	1.30674	485.207	0.975311	586.464	0.44415	145.764	2.88038	2.18491	253.917	1.06563	8.53827	166.676	0.260085	0.221011	117.827	0.53995	0.267609	0.486779	0.398036	0.0483782	27.1883	1.02905	0.49551	0.201545	0.564046	55.6617	44.1391	7.67845	69.1814	525.749	3.15895	0.822517	0.428092	114.044	0.780279	0.475511	108.641	123.469	102.477	0.829985	0.890595
CADLAD_499	0	953.273	0.15172	0.732153	0.179055	0.263928	0.0732807	300.093	1.14378	524.336	0.959707	595.623	0.734702	157.378	1.358	3.02412	194.494	1.38606	7.55123	161.289	0.24444	0.227171	94.6348	0.94026	0.95318	0.966332	0.29249	0.112041	41.3954	1.34295	0.447063	0.330496	0.794167	86.1466	77.661	5.28565	121.676	534.456	2.46723	0.708195	0.432515	144.863	0.734478	0.469033	215.049	226.402	212.84	0.940095	0.850697
CADLAD_500	0	1028.28	0.074881	0.636828	0.123057	0.184306	0.0708465	395.052	1.04107	434.171	0.961271	546.969	0.68388	107.003	1.0296	2.63641	135.843	0.749381	10.2371	128.836	0.220551	0.224275	111.618	0.584101	0.330208	0.539815	0.314098	0.225471	35.4165	1.94534	0.524185	0.526903	0.674847	54.6995	44.212	7.48281	90.0295	496.539	3.34822	0.527153	0.250851	111.443	0.644362	0.40094	90.3978	124.624	73.1907	0.587294	0.546133
CADLAD_501	0	891.287	0.0772615	0.507016	0.157517	0.395336	0.0815468	508.216	1.27274	442.352	0.811242	532.291	0.567871	198.888	1.93744	2.44722	227.316	1.13526	6.02879	292.305	0.520278	0.520198	91.9915	0.900277	0.729726	0.859824	0.356346	0.139807	32.3871	0.715364	0.534288	0.259417	0.885517	70.7256	64.6802	4.71286	128.455	577.513	2.04853	0.876904	0.519476	163.673	0.853588	0.723848	178.195	185.694	177.364	0.955139	0.906608
CADLAD_502	0	1013.35	0.0574508	0.452615	0.0176261	0.0364535	0.0120235	479.21	0.929104	416.682	0.897264	541.888	0.414011	138.459	2.10703	1.61724	204.544	1.21714	14.7961	192.741	0.338328	0.365766	118.258	0.501315	0.221926	0.453228	0.21876	0.0285054	35.5828	0.365954	0.440534	0.219197	0.503914	54.5789	40.2062	7.02139	102.16	517.755	4.25428	0.489536	0.174434	115.899	0.403362	0.205965	96.0231	139.459	72.2301	0.517932	0.458168
CADLAD_503	0	905.466	0.171175	0.752376	0.0414251	0.0781989	0.0246647	262.06	1.12536	487.732	0.956532	787.929	0.701509	162.634	1.37113	1.31165	262.349	0.829389	6.149	344.834	0.563328	0.55734	80.6199	0.929129	0.909011	0.966451	0.431303	0.152868	28.8138	0.76091	0.573609	0.238286	0.833763	144.001	137.49	3.12119	164.352	497.556	1.45628	0.901002	0.852325	188.63	0.928108	0.916016	181.855	188.662	179.625	0.952096	0.932878
CADLAD_504	1	968.1	0.0916915	0.632111	0.0263973	0.0380731	0.0137526	555.851	0.986819	434.356	0.980375	619.452	0.846053	150.075	2.85124	2.70211	258.496	2.09015	5.73464	259.006	0.411117	0.35207	107.873	0.79653	0.641608	0.828192	0.50533	0.163424	23.3839	1.03803	0.759173	0.305952	0.743648	60.9084	58.4616	6.71816	81.4023	498.935	2.74087	0.851227	0.5022	113.488	0.909641	0.619513	146.98	151.045	139.43	0.923103	0.898304
CADLAD_505	0	853.262	0.0870521	0.62227	0.0637408	0.0905292	0.0397016	391.856	1.05747	435.746	0.884653	599.07	0.640749	113.711	1.84716	2.76038	219.208	1.63198	11.3902	136.236	0.201641	0.205764	102.384	0.645448	0.423793	0.658508	0.311006	0.0344358	28.6509	1.56136	0.637109	0.426887	0.577835	59.7115	44.723	6.08065	98.1238	503.953	2.37924	0.776159	0.521097	133.367	0.749286	0.525234	110.518	138.375	98.947	0.715062	0.643932
CADLAD_506	0	1236.62	0.0406999	0.619587	0.0423826	0.0807612	0.014904	417.305	0.955794	436.103	0.861533	580.564	0.562056	181.025	2.53487	2.53939	257.741	1.64452	11.0835	188.753	0.321338	0.298739	118.098	0.442727	0.174646	0.379836	0.513047	0.0835134	25.0662	0.80567	0.533678	0.138836	0.43597	42.5333	28.4626	7.68017	67.824	472.004	3.4841	0.680807	0.276219	98.2703	0.723655	0.388094	83.5798	92.0861	79.0866	0.858833	0.818615
CADLAD_507	1	921.852	0.16079	0.61649	0.392486	1.22918	0.207874	305.302	1.01794	492.715	0.893979	546.743	0.744187	151.412	3.16529	2.87844	227.179	2.33534	7.36	170.048	0.275386	0.247268	104.54	0.637578	0.396699	0.596765	0.413812	0.188317	30.2835	0.689305	0.48771	0.26059	0.546532	54.3443	42.1318	6.04643	111.714	480.424	2.43713	0.625197	0.341728	146.85	0.752608	0.499629	142.485	161.109	137.45	0.853146	0.826028
CADLAD_508	0	918.112	0.152787	0.722054	0.127235	0.261987	0.0946972	306.01	1.38826	527.597	0.9121	493.218	0.473489	142.199	2.94031	3.29017	284.801	1.8827	8.30269	151.539	0.229598	0.213535	92.0524	0.923557	0.869867	0.952781	0.527644	0.113039	46.9231	1.54334	0.762018	0.598976	0.928726	123.636	119.911	4.64129	112.695	505.292	1.73495	0.935122	0.764919	132.391	0.921999	0.680183	205.755	218.619	200.257	0.916009	0.902756
CADLAD_509	0	1019.95	0.0784747	0.636627	0.0782053	0.280866	0.0385227	475.857	1.12738	503.365	0.936213	570.469	0.724843	123.262	2.12642	2.97401	150.86	1.11975	9.44072	149.098	0.229952	0.216728	93.313	0.915915	0.794567	0.935797	0.610024	0.234236	28.0189	1.38636	0.799998	0.716607	0.918165	57.3622	51.545	8.94341	60.8188	548.907	1.85154	0.913425	0.814695	78.8501	0.857193	0.708983	112.098	118.265	110.425	0.933709	0.931198
CADLAD_510	1	1226.33	0.134409	0.691671	0.364338	0.831362	0.12202	454.086	0.985191	431.762	0.894107	512.154	0.590445	126.722	1.2991	1.70331	143.97	0.582508	14.8569	116.627	0.191141	0.197212	114.539	0.613741	0.376839	0.619714	0.552357	0.337976	29.5373	1.23852	0.596463	0.300591	0.545673	54.4935	43.2986	6.92552	98.3407	498.009	3.42453	0.473176	0.156458	106.759	0.484915	0.158249	78.9171	120.035	62.0475	0.516911	0.511002
CADLAD_511	0	769.267	0.0905365	0.530282	0.262851	1.10926	0.0891665	479.543	1.08739	426.227	0.844764	540.361	0.40913	129.282	1.09341	1.99101	149.746	0.789362	8.51517	265.392	0.501685	0.456257	113.812	0.629413	0.396655	0.629722	0.505765	0.177594	33.1601	0.997498	0.513109	0.289792	0.538982	54.908	44.1438	7.37234	78.4329	538.423	3.77018	0.665747	0.371634	87.6513	0.567546	0.335881	94.3836	128.878	76.5104	0.593665	0.618946
CADLAD_512	0	1120.3	0.0545811	0.37868	0.118356	0.192861	0.0435298	375.618	1.17388	589.398	0.940354	477.871	0.66221	121.846	0.618971	2.06437	209.403	0.75783	12.1524	115.628	0.176367	0.190415	113.034	0.56828	0.363736	0.578161	0.378399	0.0432216	25.3293	0.373428	0.311581	0.0558145	0.575879	62.5527	48.2949	9.50378	86.3843	577.573	4.01708	0.493456	0.309476	94.3961	0.59452	0.334202	102.266	143.389	83.1664	0.580007	0.574333
CADLAD_513	0	784.836	0.0979136	0.408935	0.0305605	0.0594066	0.0240106	393.559	1.64115	418.661	0.971209	564.249	0.255085	128.908	1.57834	1.66019	232.641	0.980335	7.7733	241.82	0.425311	0.387042	103.777	0.770932	0.574594	0.754437	0.321955	0.113363	36.5042	0.635191	0.55352	0.29568	0.693841	75.8213	73.3264	7.25441	99.9859	533.394	3.56715	0.560476	0.285065	133.215	0.595698	0.290999	113.594	141.055	96.0488	0.68093	0.704846
CADLAD_514	0	971.665	0.101673	0.661561	0.0477941	0.0816405	0.0352391	267.262	0.990796	440.947	0.945258	678.828	0.667141	211.196	1.54829	2.09816	241.549	1.06277	7.26304	249.929	0.36483	0.330267	86.0819	0.922989	0.887177	0.954627	0.603372	0.297715	38.5428	1.48058	0.873412	0.788645	0.909776	110.554	107.972	3.66144	152.44	526.442	1.55222	0.902429	0.79823	204.869	0.951043	0.878322	223.035	225.019	218.035	0.968961	0.932542
CADLAD_515	0	862.637	0.0570046	0.479815	0.262881	0.502517	0.146057	409.799	1.47901	471.812	0.938993	519.882	0.438773	119.436	1.12652	1.11505	122.277	0.494125	12.1316	113.697	0.202044	0.176633	97.6577	0.902842	0.902611	0.940041	0.29827	0.158963	28.8744	1.36858	0.607154	0.646502	0.524363	49.9637	33.8122	7.43824	94.9843	484.47	3.46805	0.457944	0.167963	79.47	0.755929	0.576102	83.3885	107.452	67.4167	0.627412	0.599381
CADLAD_516	0	721.947	0.0988186	0.491656	0.0661974	0.0933624	0.0272724	383.625	1.00443	532.599	0.95671	522.091	0.704447	149.184	2.25081	1.26661	153.454	0.711086	9.61098	123.621	0.212151	0.209354	88.506	0.913149	0.857105	0.941004	0.347666	0.158639	33.2542	0.405389	0.345688	0.0840127	0.450916	70.722	60.9992	5.45062	121.599	554.474	2.64904	0.691504	0.329343	141.058	0.717576	0.444871	153.046	185.487	144.107	0.77691	0.727581
CADLAD_517	0	986.578	0.139009	0.700369	0.0575573	0.144288	0.0351684	409.919	1.89035	423.414	0.899529	569.525	0.591242	128.381	3.27292	3.04487	164.344	1.36825	7.22335	183.75	0.324681	0.361717	109.331	0.950829	0.943856	0.959786	0.454506	0.178465	30.1057	0.99552	0.660323	0.337396	0.922587	79.2208	72.4405	5.949	97.0582	544.431	1.8925	0.872902	0.633255	119.594	0.903719	0.587279	152.819	160.268	143.305	0.894159	0.876457
CADLAD_518	0	779.536	0.13921	0.615214	0.0920216	0.161263	0.0504468	269.226	1.52118	550.599	0.96014	453.901	0.530258	133.995	0.262781	0.098271	158.753	0.0552887	0.727115	147.632	0.296152	0.29018	89.6927	0.932667	0.900852	0.959439	0.407864	0.180717	44.8619	0.535658	0.566702	0.249151	0.732829	94.2558	86.1017	5.47149	110.858	546.927	2.03094	0.815574	0.448312	123.165	0.839253	0.654594	127.464	138.606	117.18	0.845416	0.841337
CADLAD_519	0	839.171	0.0770523	0.77803	0.100849	0.171322	0.0467846	705.615	1.38579	541.663	0.919545	466.034	0.611831	119.356	0.929679	1.71314	136.126	0.607076	10.3934	159.587	0.275567	0.298812	99.5928	0.898278	0.800903	0.891777	0.340916	0.0998397	26.5788	1.06549	0.687323	0.287751	0.559011	53.4396	43.1146	5.66259	98.6618	485.406	2.08441	0.813947	0.506785	136.899	0.935569	0.769631	132.643	147.875	127.524	0.862375	0.818289
CADLAD_520	0	871.669	0.114825	0.697371	0.17135	0.264507	0.084391	304.807	1.20653	445.121	0.911561	480.184	0.851138	82.1503	0.0714204	0.329435	200.296	0.0872757	7.6727	198.493	0.427056	0.407592	104.794	0.730849	0.540583	0.749219	0.311336	0.0981956	35.8659	1.2105	0.581852	0.390358	0.794334	63.1257	60.2617	7.84094	77.7362	584.769	0.538616	0.844518	0.638124	80.7745	0.559584	0.251742	87.1555	94.7417	72.7358	0.767728	0.727104
CADLAD_521	0	1038.19	0.0712658	0.48945	0.0755657	0.162775	0.0243501	331.492	1.54795	440.512	0.973696	510.037	0.618815	136.491	1.67424	0.297272	154.797	0.168015	11.4851	121.866	0.199845	0.199558	113.365	0.489707	0.264914	0.509744	0.361972	0.0491377	37.3428	0.754023	0.374312	0.178343	0.427182	63.9383	54.2345	6.20102	97.5411	544.901	2.77401	0.784793	0.495727	102.808	0.607428	0.277786	89.981	118.489	82.0432	0.692411	0.628644
CADLAD_522	0	972.999	0.22476	0.781013	0.405455	0.619869	0.204907	564.021	1.43347	471.868	0.905621	712.714	0.596458	171.56	2.09854	2.91302	214.882	1.1487	1.79335	217.56	0.407229	0.403918	93.4195	0.891978	0.848175	0.915622	0.519485	0.354928	50.8961	1.67874	0.798988	0.781777	0.941157	117.155	112.228	4.57305	110.59	502.038	2.01302	0.958779	0.6751	160.453	0.942008	0.687225	193.406	199.426	180.274	0.903967	0.896279
CADLAD_523	0	954.707	0.132866	0.734367	0.0683714	0.109389	0.0515676	599.878	1.39643	536.203	0.938819	532.488	0.757297	185.931	2.70856	2.94118	312.069	1.73146	5.93783	264.721	0.524822	0.561689	102.095	0.678145	0.465985	0.677007	0.294623	0.0825146	37.1845	0.809123	0.656905	0.356779	0.554627	65.4832	53.2301	4.29238	127.612	500.941	1.80377	0.86807	0.810082	183.221	0.879631	0.837472	210.452	215.372	201.366	0.934967	0.929647
CADLAD_524	1	970.148	0.0699171	0.536018	0.167329	0.337967	0.0748035	263.395	1.27147	536.324	0.967193	522.577	0.592355	144.678	1.6522	1.77887	195.122	1.10301	7.27292	238.842	0.35641	0.311128	93.6701	0.889477	0.857143	0.949412	0.387543	0.119885	35.322	0.657353	0.384013	0.193634	0.445205	56.7413	44.1967	6.06195	104.664	515.75	2.62586	0.661156	0.484788	143.463	0.842078	0.560941	110.135	134.417	95.4612	0.710186	0.656497
CADLAD_525	0	963.381	0.077763	0.631569	0.0573857	0.114833	0.0233273	637.608	1.87264	428.704	0.963181	535.308	0.657261	82.2851	1.40748	0.964564	172.082	0.649887	11.1437	159.232	0.256414	0.234288	94.5105	0.966306	0.933548	0.968719	0.474306	0.277256	32.9045	1.10642	0.733966	0.548333	0.67418	42.4528	39.808	9.43337	60.9109	497.939	1.72879	0.864928	0.901217	97.8694	0.749013	0.61203	85.2772	109.783	79.3897	0.72315	0.683133
CADLAD_526	0	665.822	0.11549	0.655652	0.0299523	0.0485308	0.0178396	358.405	1.1127	407.157	0.949313	470.321	0.579597	221.354	3.51041	1.93441	277.02	1.47507	10.6691	185.293	0.315517	0.314542	108.087	0.559095	0.271813	0.446616	0.266421	0.0251839	37.3892	0.522139	0.391784	0.158869	0.661756	41.2475	30.0876	7.84988	104.265	469.099	4.90833	0.388539	0.172368	123.263	0.719343	0.476289	93.568	106.704	92.4474	0.866391	0.82485
CADLAD_527	0	1084.19	0.0611277	0.41696	0.0904873	0.172137	0.0426189	370.803	2.14678	548.201	0.916045	452.595	0.507795	77.5804	0.149626	0.295369	150.928	0.0789711	9.10427	139.406	0.437028	0.300269	109.577	0.667629	0.47213	0.689238	0.282239	0.0295768	26.4857	0.628728	0.273327	0.117454	0.597744	30.9441	23.398	13.6894	65.2933	625.011	2.49677	0.47406	0.0927354	99.7178	0.617426	0.38507	103.351	123.905	100.342	0.809835	0.726723
CADLAD_528	0	966.87	0.0531994	0.414403	0.0773555	0.147189	0.0213012	539.617	1.03672	453.253	0.972792	443.772	0.456274	119.48	1.94511	0.768349	181.85	0.409604	11.9052	150.386	0.231479	0.235942	114.287	0.678227	0.450785	0.670118	0.443314	0.119553	28.2298	0.317475	0.622745	0.214051	0.678582	40.891	35.8203	6.99726	77.3013	553.232	3.52083	0.847043	0.410185	70.7192	0.695964	0.248083	58.9227	72.9979	46.9207	0.642767	0.59548
CADLAD_529	0	942.129	0.0631899	0.689616	0.827251	2.26216	0.275528	380.125	1.5901	481.273	0.955842	583.095	0.534369	248.707	3.13362	0.500203	278.046	0.0896785	1.63889	143.046	0.257312	0.274993	109.733	0.535077	0.247885	0.453258	0.425559	0.222441	33.9086	1.2868	0.690433	0.455859	0.837456	75.7729	68.5796	5.34712	107.96	603.235	1.84101	0.970287	0.68725	154.501	0.884342	0.768152	181.219	183.209	174.524	0.952598	0.946693
CADLAD_530	0	865.233	0.0766198	0.507218	0.0296979	0.085684	0.0177412	661.451	1.68373	515.21	0.950061	555.997	0.685244	104.102	2.03957	0.186542	80.0255	0.0996006	10.4003	123.899	0.226849	0.215197	124.071	0.48658	0.245462	0.470803	0.333135	0.0745285	33.7594	0.246382	0.432874	0.0710244	0.393985	52.8838	34.5991	9.0491	78.0514	530.842	2.92798	0.609011	0.275777	102.814	0.627679	0.401981	83.5466	117.464	58.4979	0.498007	0.476644
CADLAD_531	0	974.327	0.150818	0.671557	0.0538793	0.0990253	0.0228573	288.612	1.23983	430.319	0.880799	502.128	0.703512	172.841	2.44019	1.66817	145.373	0.542342	7.79431	142.265	0.263985	0.274646	118.419	0.490814	0.235181	0.472687	0.403644	0.0305153	31.9992	1.20413	0.400662	0.26994	0.455073	52.3758	35.2935	6.17364	112.77	558.461	2.79616	0.583226	0.337227	137.207	0.847646	0.755703	129.959	145.363	125.554	0.863731	0.852497
CADLAD_532	0	1068.99	0.139077	0.628964	0.475043	0.957163	0.318674	414.766	1.99864	600.653	0.907935	412.967	0.613505	92.4852	2.15861	2.61207	35.1932	2.17345	1.13524	84.9151	0.198666	0.192492	96.1334	0.817341	0.732424	0.893099	0.493614	0.240737	31.6777	1.69501	0.494741	0.466113	0.536556	40.4821	30.0071	14.1886	45.2669	532.991	3.29213	0.731478	0.35456	59.3012	0.782634	0.170792	37.2184	50.5043	30.8585	0.611007	0.55552
CADLAD_533	0	1040.91	0.0984918	0.612359	0.0224475	0.0450751	0.0109638	271.574	1.12477	429.235	0.936987	503.657	0.822164	127.114	1.76714	3.46294	278.351	1.32595	7.34839	175.548	0.287316	0.278541	93.5471	0.882978	0.816588	0.907013	0.410583	0.0607589	31.7864	0.929946	0.577829	0.200326	0.660115	70.8614	63.5059	5.08129	106.883	520.586	2.23926	0.896337	0.62804	124.365	0.705244	0.418945	125.9	138.81	120.138	0.865484	0.826317
CADLAD_534	0	1619.61	0.0628931	0.546062	0.0390001	0.057755	0.0199475	532.13	1.21582	419.379	0.91592	521.64	0.644448	190.97	2.8139	1.44378	252.483	0.912333	8.73649	182.286	0.29541	0.282015	111.278	0.624869	0.436083	0.671077	0.38314	0.126342	29.803	1.03131	0.561125	0.311559	0.671917	58.7872	51.0419	6.74321	104.987	561.174	3.64783	0.634432	0.485552	112.785	0.688547	0.568514	90.2591	114.535	82.0685	0.716535	0.717116
CADLAD_535	0	652.364	0.176075	0.688189	0.288401	5.22501	0.128612	696.78	26.1667	471.699	0.882671	249.622	0.732144	58.6249	0.968723	2.55811	29.8766	1.26972	10.0001	3.21881	0.277328	0.275	115.422	0.537488	0.324391	0.574458	0.665551	0.27128	11.0044	0.433237	0.648909	0.197522	0.636442	20.4449	16.1324	172.236	3.86962	562.855	2.27628	0.766674	0.609148	26.3185	0.65713	0.351607	22.8365	23.3565	20.3936	0.873147	0.834264
CADLAD_536	0	1240.84	0.2344	0.777365	0.973775	2.045	0.319936	495.017	5.02696	389.167	0.749111	247.815	0.606006	51.4626	1.78831	2.22169	84.9382	1.33388	7.03599	69.1836	0.198029	0.135239	107.453	0.810871	0.566604	0.812932	0.642011	0.402447	29.2312	0.595885	0.599556	0.259105	0.615262	28.7915	24.4241	13.9579	53.4427	620.274	1.88416	0.695304	0.624895	43.6413	0.787287	0.587787	55.0861	66.2824	48.6712	0.7343	0.642514
CADLAD_537	0	1051.6	0.0658529	0.570101	0.0201619	0.0526796	0.0138145	265.636	1.86195	488.14	0.961608	486.84	0.318176	106.973	1.42525	0.917203	160.728	0.55226	12.2851	93.5558	0.169958	0.150307	107.224	0.805639	0.647126	0.837155	0.433135	0.156169	23.1613	1.32296	0.66509	0.405876	0.582068	23.4043	18.3145	14.3777	41.9264	610.238	0.696345	0.890794	0.32721	55.445	0.771077	0.44561	67.5989	75.6402	61.592	0.814275	0.773935
CADLAD_538	0	1109.02	0.040801	0.676678	0.0368828	0.107648	0.0152979	329.642	4.95821	644.419	0.964812	186.832	0.198664	46.6301	0.582734	0.9107	6.12034	0.546676	11.2103	2.7136	0.238741	0.233871	117.715	0.480828	0.206735	0.411968	0.464088	0.0975785	20.9194	1.27308	0.582505	0.3116	0.499639	16.1845	10.997	35.0858	19.6551	640.329	3.37178	0.645581	0.196089	16.2303	0.669478	0.125922	10.9479	14.2881	9.18484	0.64283	0.642867
CADLAD_539	0	697.307	0.0665709	0.326394	0.0704495	0.0933517	0.0287395	319.671	2.57781	460.707	0.898657	490.245	0.643861	87.4831	2.54102	2.36958	136.299	1.31254	15.6234	170.196	0.26931	0.242103	95.6571	0.88318	0.816015	0.952538	0.480463	0.241456	26.4221	0.850481	0.703328	0.437763	0.746937	46.7599	40.3827	10.8686	53.9175	537.33	2.38485	0.818653	0.715194	79.9388	0.860057	0.696924	88.196	94.136	84.1473	0.89389	0.843553
CADLAD_540	0	1126.94	0.138362	0.598185	0.21913	0.361698	0.053294	311.187	1.07103	539.695	0.855969	469.293	0.624867	110.169	1.77154	2.32339	181.458	1.33852	7.55456	158.24	0.36312	0.330267	99.2096	0.940383	0.917506	0.958709	0.377582	0.0967914	30.7891	1.45371	0.668596	0.489268	0.516899	46.9368	33.5796	6.73407	100.092	523.138	2.62244	0.649196	0.44082	88.7671	0.641944	0.330941	85.1452	105.304	78.2566	0.74315	0.761527
CADLAD_541	0	1325.82	0.127131	0.630681	0.141863	0.27786	0.0455691	521.296	1.27538	435.047	0.863478	402.979	0.499701	91.7577	0.0249789	1.38994	48.3764	0.63117	21.4902	44.2931	0.125325	0.0334855	89.0508	0.901542	0.849102	0.947533	0.53555	0.252457	44.028	0.776317	0.400568	0.206231	0.636787	21.3557	20.0982	12.2964	66.2495	580.306	0.502827	0.605973	0.211295	66.5114	0.516799	0.160189	42.703	57.3257	38.4403	0.670558	0.643581
CADLAD_542	0	1036.82	0.0902197	0.779206	0.0489819	0.110814	0.0283503	692.016	3.40521	644.116	0.946654	355.773	0.0220253	102.507	0.112004	0.244038	121.116	0.111331	1.11283	122.938	0.314969	0.305849	94.7931	0.87763	0.77691	0.878164	0.42885	0.0190743	35.0867	1.0259	0.659692	0.231402	0.524798	42.1691	36.3729	11.6489	49.8131	574.952	1.39116	0.803781	0.24609	66.9821	0.806211	0.476689	54.6951	60.4688	52.1389	0.862245	0.856492
CADLAD_543	0	1106.21	0.050105	0.519508	0.0409457	0.0623688	0.0268027	486.342	2.31621	511.34	0.887644	563.346	0.473131	161.93	2.49424	2.26235	276.012	1.50197	15.2312	184.491	0.318279	0.277258	108.443	0.926961	0.83504	0.954251	0.444911	0.384882	30.0115	1.47376	0.561793	0.4742	0.666814	27.7174	21.0518	17.0164	41.5238	580.328	0.995079	0.656335	0.285829	51.8413	0.64086	0.206684	57.7807	70.8026	48.2823	0.681929	0.686426
CADLAD_544	0	739.36	0.0891026	0.706539	0.0940427	0.181671	0.0257388	275.804	0.973115	429.469	0.930897	592.804	0.627205	225.604	2.64014	2.61719	226.756	1.71136	7.67607	208.359	0.315463	0.304606	103.456	0.600108	0.346397	0.579501	0.443506	0.0768311	33.3125	1.2058	0.534246	0.239334	0.827315	59.8746	53.7027	5.73917	89.329	482	2.59379	0.844303	0.451062	168.114	0.895279	0.606082	215.562	219.825	201.785	0.917937	0.897541
CADLAD_545	0	898.8	0.043789	0.223084	0.00513709	0.0102626	0.00259794	474.484	2.07143	477.475	0.704871	444.915	0.432389	114.008	0.0249099	0.503238	39.9069	0.219928	24.7737	69.5355	0.168042	0.143096	112.083	0.714826	0.527807	0.750924	0.278309	0.046327	25.9533	0.177148	0.674435	0.342776	0.411619	32.699	30.9563	14.7502	62.7887	646.752	6.64303	0.443848	0.00902962	71.0334	0.428404	0.302343	42.0199	63.6558	28.9421	0.454666	0.378995
CADLAD_546	0	910.352	0.108258	0.790463	0.7211	1.51289	0.414668	397.459	1.32355	557.973	0.886154	494.953	0.794961	174.529	2.1188	2.1606	217.226	1.65975	6.73468	214.42	0.8096	0.812192	105.882	0.628568	0.348579	0.604266	0.449523	0.406594	27.5614	1.53188	0.613355	0.599118	0.849079	58.3799	50.2568	6.06176	90.2709	500.052	2.53095	0.818667	0.44001	104.098	0.894673	0.641902	111.815	114.28	108.688	0.951063	0.919165
CADLAD_547	0	1143.14	0.0823621	0.512365	0.0271518	0.0563849	0.00652307	867.858	3.02098	546.15	0.915134	606.345	0.0848964	63.9427	3.0313	3.36027	99.2074	1.42742	26.3609	96.5478	0.228831	0.196363	114.791	0.577741	0.3185	0.54694	0.351951	0.00901265	23.3439	0.569726	0.364839	0.130754	0.330375	21.6854	12.8063	20.2973	36.732	608.781	1.84285	0.624283	0.189416	41.2036	0.676321	0.329553	48.017	50.3587	40.9013	0.812198	0.587506
CADLAD_548	0	1182.96	0.102995	0.68923	0.30365	0.511437	0.0806697	470.252	1.49614	513.571	0.842025	481.998	0.718245	130	1.30789	1.99525	176.74	1.47827	1.76138	177.477	0.441837	0.455148	111.713	0.501863	0.219631	0.438024	0.50731	0.134914	31.5675	1.45868	0.558164	0.406017	0.494817	54.729	45.1636	6.14834	89.2703	488.916	2.37481	0.821679	0.62099	55.8526	0.886007	0.524549	50.9113	63.0022	44.7959	0.711022	0.676701
CADLAD_549	0	874.595	0.113197	0.51245	0.268881	1.43335	0.0674392	286.819	1.66249	549.57	0.942131	393.12	0.47539	129.981	1.91044	2.35723	121.838	1.62808	6.3479	172.846	0.431435	0.413884	104.835	0.723503	0.52481	0.721436	0.412371	0.267541	23.607	0.220325	0.544139	0.0916614	0.768787	79.1571	77.3017	4.93189	120.386	613.673	0.246138	0.919459	0.566477	105.421	0.879207	0.856111	105.543	117.128	99.513	0.849606	0.760219
CADLAD_550	0	859.571	0.107023	0.536752	0.0785125	0.190385	0.0354135	486.542	2.79309	552.784	0.792795	277.56	0.635274	66.4798	0.14169	0.188499	51.3668	0.0630113	2.70658	117.585	0.2813	0.268485	103.843	0.750047	0.566211	0.768727	0.366597	0.0264415	21.327	0.477112	0.643684	0.308635	0.432163	43.2494	30.693	9.81816	72.4182	614.979	2.42192	0.804433	0.526099	66.7729	0.51656	0.158724	38.0382	58.9188	28.8876	0.490295	0.44876
CADLAD_551	1	774.907	0.0661552	0.446756	0.0216903	0.0339074	0.0153367	323.152	1.02378	443.736	0.945806	466.068	0.517872	120.882	1.72845	1.61798	151.366	0.843496	2.87578	159.09	0.383371	0.425294	105.543	0.757453	0.617294	0.815022	0.403715	0.190674	27.2429	1.81245	0.604313	0.688021	0.617641	54.2489	45.0651	7.84775	80.1658	518.188	2.64457	0.671865	0.450982	96.7486	0.62307	0.421279	82.0788	96.3455	74.5883	0.774175	0.726902
CADLAD_552	0	1076.05	0.10058	0.66063	0.230392	0.556467	0.15853	617.357	2.75369	566.357	0.838332	380.539	0.480107	68.8153	0.0878235	1.72887	88.7365	0.494708	16.1938	67.2886	0.13422	0.14602	117.618	0.597001	0.311391	0.512438	0.5698	0.163122	24.6415	2.00363	0.666275	0.667831	0.589208	22.5631	17.2304	16.4849	45.2935	543.122	2.80284	0.611131	0.571139	38.4565	0.575673	0.449486	42.4196	56.8371	32.0412	0.563736	0.5866
CADLAD_553	0	1102.25	0.0885622	0.74537	0.0442736	0.0662346	0.0257491	332.166	2.65837	631.531	0.886003	386.71	0.526189	67.6451	1.30168	3.99743	8.27113	2.02055	18.6652	81.23	0.185797	0.178161	89.3212	0.893085	0.847143	0.931526	0.585676	0.16771	12.2925	0.983073	0.540611	0.304935	0.614644	24.8304	17.8017	28.2349	27.3532	677.396	2.4026	0.594893	0.426127	43.5939	0.857713	0.665449	6.33334	6.37578	6.04807	0.9486	0.92032
CADLAD_554	0	1274.56	0.0582135	0.553366	0.190258	0.282317	0.0448888	334.368	2.12161	522.187	0.90571	646.124	0.279293	31.2657	0.683199	2.36079	61.1258	0.925231	16.7747	80.0558	0.199818	0.192038	101.849	0.839155	0.7121	0.902884	0.777335	0.388131	25.6331	0.796785	0.7706	0.31178	0.791348	42.5345	36.4423	13.257	41.4997	519.372	2.00104	0.896149	0.633729	18.2926	0.862501	0.577404	20.9701	22.7454	20.2582	0.89065	0.788225
CADLAD_555	0	1134.68	0.177774	0.794081	0.204106	0.507257	0.0996405	357.687	1.58194	509.794	0.943594	615.418	0.821122	91.2171	0.557479	0.911106	210.391	0.304437	2.61549	143.805	0.231258	0.234666	97.6593	0.843314	0.737273	0.89281	0.331662	0.15296	25.8145	1.43434	0.555156	0.396372	0.694621	63.645	58.4745	8.02552	73.8897	595.084	0.726893	0.79997	0.372939	76.9805	0.778888	0.473431	124.56	130.588	119.872	0.917941	0.910557
CADLAD_556	0	1040.28	0.0957496	0.509445	0.0463947	0.108805	0.0174816	449.051	1.96809	463.563	0.881417	502.568	0.50217	154.193	0.185382	0.350299	172.245	0.202093	5.46679	120.691	0.245431	0.222719	102.891	0.798237	0.701239	0.867073	0.605074	0.18668	49.1339	1.84901	0.794421	0.779584	0.668295	55.0172	49.3792	9.42145	68.5063	523.904	2.0213	0.776217	0.745032	123.55	0.832356	0.641279	137.78	140.953	135.008	0.957828	0.930309
CADLAD_557	0	578.337	0.0892558	0.558807	0.0710226	0.140502	0.023105	284.856	1.09038	419.227	0.945453	480.428	0.515219	146.942	2.68976	3.32213	374.709	2.28256	16.1054	114.908	0.179371	0.172301	116.287	0.41059	0.128191	0.269102	0.294914	0.0204425	36.7605	0.962923	0.438099	0.300673	0.379721	50.8694	32.6928	6.49288	100.696	490.282	3.04024	0.654137	0.60265	120.819	0.321038	0.0760806	118.204	146.785	101.117	0.688881	0.633306
CADLAD_558	1	885.406	0.0852762	0.558066	0.0487394	0.0892667	0.0310715	279.694	1.1584	454.234	0.913472	466.368	0.789915	89.0402	0.893753	0.261747	160.303	0.140135	0.600561	91.4496	0.308557	0.323262	100.4	0.867906	0.777184	0.90485	0.460573	0.215895	34.9092	1.39599	0.478134	0.358409	0.485301	47.0305	34.7655	6.90318	88.2882	550.902	2.81302	0.747138	0.411013	79.6287	0.608505	0.29866	71.6206	84.2977	65.4891	0.776879	0.755875
CADLAD_559	0	962.027	0.110665	0.686986	0.178274	0.334005	0.0593605	416.296	2.63081	303.236	0.939331	281.38	0.69116	98.8381	0.0901967	0.428324	158.854	0.114726	5.39693	92.4492	0.369402	0.235636	96.6799	0.695062	0.516279	0.729005	0.458325	0.0813083	39.9527	1.1427	0.458003	0.327478	0.774151	57.6113	50.7412	8.89755	75.5551	564.511	1.85027	0.716913	0.576754	68.9483	0.717622	0.754068	78.2138	84.6422	73.0976	0.863607	0.830535
CADLAD_560	0	1096.89	0.0742468	0.430305	0.0184332	0.0225701	0.0105925	392.243	1.98551	427.328	0.95109	575.151	0.548701	91.6264	0.800251	1.03749	101.523	0.538891	16.795	93.36	0.155931	0.145024	120.306	0.521235	0.247875	0.462588	0.306928	0.0934202	30.2176	1.18929	0.683485	0.160427	0.580258	40.0918	30.9665	10.1717	67.6353	500.439	2.78114	0.576946	0.418053	77.0402	0.420999	0.126675	49.014	72.687	35.0151	0.481725	0.50331
CADLAD_561	0	879.107	0.118436	0.733033	0.0342721	0.0453775	0.0122565	383.18	2.30173	422.51	0.953035	434.197	0.50627	50.6873	0.051338	1.45606	224.776	1.24402	2.0701	173.692	0.36406	0.357459	95.5563	0.882353	0.831531	0.942201	0.310052	0.195439	35.1174	1.6684	0.605765	0.752711	0.54419	41.9091	35.1927	3.82979	145.286	560.3	1.51105	0.926627	0.618276	83.5696	0.723765	0.494706	86.5833	103.283	81.3165	0.78732	0.715412
CADLAD_562	0	1114.27	0.122645	0.56158	0.561138	1.08765	0.238037	318.546	1.01495	535.846	0.897573	471.042	0.448855	121.576	1.95269	0.591013	99.2356	0.306604	10.027	147.729	0.310735	0.266186	101.97	0.888546	0.838462	0.929002	0.718197	0.393372	33.691	1.24276	0.765439	0.749606	0.736597	42.3898	36.0159	6.13116	82.8379	489.895	2.07447	0.874694	0.595316	90.604	0.744235	0.495912	76.2683	88.7256	70.7271	0.797145	0.778609
CADLAD_563	0	873.136	0.0990649	0.618849	0.0651051	0.0848384	0.0442549	286.088	2.09987	525.281	0.906227	398.105	0.515694	103.248	0.184837	0.352519	121.886	0.174181	0.909096	129.025	0.345245	0.320684	101.103	0.752225	0.579382	0.756245	0.605055	0.204529	27.7388	0.460345	0.765632	0.234242	0.830018	60.7064	56.7323	7.9232	77.8313	597.77	1.28908	0.839506	0.340238	98.1384	0.87905	0.638822	107.166	109.935	102.296	0.930512	0.91751
CADLAD_564	0	990.733	0.160159	0.846841	0.179226	0.25589	0.133806	320.416	1.29556	513.542	0.940775	471.997	0.935381	165.858	1.90387	2.2749	174.081	1.14814	6.04211	223.943	0.491402	0.4962	86.3295	0.90683	0.893689	0.964597	0.658993	0.259765	38.7514	1.22508	0.792073	0.383318	0.932989	95.5386	90.3948	4.14644	125.171	504.185	1.68971	0.936039	0.756379	133.262	0.917557	0.785356	160.121	167.323	155.188	0.927477	0.919854
CADLAD_565	0	1078.04	0.0703608	0.735637	0.521438	1.11526	0.296393	662.715	3.19668	585.799	0.5343	268.899	0.548392	20.4623	1.26145	1.57619	40.3741	0.561476	15.6309	48.4676	0.136781	0.0332717	92.7722	0.939699	0.90894	0.960623	0.497203	0.373677	22.7775	1.1885	0.52996	0.390167	0.570049	30.3794	25.6133	10.9028	62.7686	644.072	0.564208	0.762354	0.571205	58.8256	0.722777	0.500691	45.1699	66.6432	37.4687	0.562228	0.565919
CADLAD_566	0	1075.05	0.100062	0.751631	0.138401	0.196873	0.0749146	382.674	1.73236	612.174	0.969678	486.324	0.661597	134.493	1.21914	1.55281	173.821	0.85199	10.0709	175.124	0.269915	0.248893	85.725	0.927033	0.909538	0.963183	0.517815	0.123912	26.6652	0.920698	0.598698	0.223038	0.691628	72.2532	63.8969	5.98573	100.095	556.833	2.21889	0.859133	0.66916	99.2497	0.830325	0.521868	147.332	148.53	136.013	0.915732	0.879402
CADLAD_567	0	964.566	0.079156	0.701666	0.113144	0.221762	0.0368781	302.584	1.07144	474.408	0.960246	480.182	0.612816	129.111	3.07066	2.35099	111.727	1.52011	7.13388	141.865	0.274952	0.250262	93.5744	0.831898	0.73796	0.906067	0.334083	0.0612251	31.9487	1.10353	0.408971	0.320337	0.502215	46.8425	36.5791	7.6543	98.1427	517.635	3.67382	0.505156	0.185415	113.664	0.544751	0.274339	75.5632	102.522	72.3585	0.705785	0.70677
CADLAD_568	0	876.986	0.0905139	0.711088	0.215251	0.298468	0.0841686	293.023	1.13566	499.977	0.945539	499.106	0.675816	116.108	1.16537	0.998347	146.806	0.598666	12.0184	214.681	0.357274	0.382594	108.612	0.787564	0.708239	0.859763	0.513916	0.159974	34.5279	0.975358	0.538704	0.289973	0.592465	60.2434	52.4261	3.23442	148.687	431.5	1.41583	0.878333	0.811221	123.519	0.669187	0.400787	83.7625	110.85	75.8823	0.684548	0.637006
CADLAD_569	0	756.459	0.113594	0.655165	0.041503	0.0846214	0.0344677	497.086	2.30169	566.805	0.953837	404.434	0.267881	110.925	0.329871	2.50014	63.2804	1.60836	4.11604	98.3535	0.257861	0.241067	107.155	0.70782	0.487666	0.68957	0.433161	0.153244	32.1242	0.947504	0.530982	0.277315	0.773529	57.2699	53.1367	10.1362	58.7192	580.465	0.818431	0.855754	0.437649	72.4786	0.831207	0.581816	35.276	37.2935	33.5227	0.89889	0.886164
CADLAD_570	0	936.134	0.173796	0.846124	0.0560637	0.0834925	0.0383384	270.43	1.31466	462.181	0.966055	499.869	0.751652	220.824	1.75812	2.80254	273.644	1.73091	5.06075	292.583	0.542226	0.547329	95.4604	0.809651	0.676191	0.830381	0.326032	0.055256	56.2277	1.49246	0.82096	0.632438	0.843847	155.66	148.245	4.3207	138.208	534.283	1.61488	0.847871	0.592838	166.893	0.935796	0.784071	248.769	256.2	233.514	0.911454	0.955976
CADLAD_571	0	1131.94	0.0613941	0.607008	0.0801752	0.158844	0.0582275	540.58	2.62392	571.866	0.940907	288.018	0.810274	81.589	0.122919	0.882412	50.7942	0.440898	9.03956	4.52075	0.246554	0.212919	114.174	0.628269	0.3834	0.59916	0.323531	0.157694	27.3911	0.89922	0.778974	0.29144	0.667895	34.3005	27.2619	16.9968	34.2918	519.555	2.31771	0.81288	0.512124	21.9803	0.907998	0.65054	12.7007	13.9402	11.8611	0.850852	0.853493
CADLAD_572	0	1126.11	0.0779259	0.605635	0.0769722	0.136541	0.0301895	388.793	1.21417	475.194	0.894185	639.174	0.332853	206.558	1.04229	2.53596	279.57	1.32205	11.0444	129.945	0.192518	0.171197	89.0475	0.978035	0.958218	0.975078	0.387417	0.0727641	28.1738	1.50659	0.588157	0.492778	0.858105	73.1372	68.3371	6.09515	91.8974	539.936	2.08811	0.870038	0.690708	90.8231	0.888862	0.697166	106.948	108.821	103.157	0.947945	0.947382
CADLAD_573	0	1124.75	0.163002	0.806493	0.132189	0.43991	0.0813412	304.558	2.64796	522.083	0.955398	424.172	0.891996	151.219	2.21681	2.7156	205.077	1.93771	5.89546	149.649	0.317123	0.33329	102.463	0.78871	0.604503	0.853323	0.56172	0.238659	32.7025	1.76376	0.818837	0.801978	0.863137	47.288	43.9388	10.8738	50.9157	529.266	1.78352	0.86746	0.798902	92.7813	0.96797	0.69719	114.586	115.935	109.218	0.942056	0.900964
CADLAD_574	1	1029.23	0.153527	0.658415	0.126357	0.192211	0.0554353	567.243	1.07368	464.013	0.940506	553.312	0.754567	165.694	2.64572	0.297804	199.383	0.215761	1.57258	154.847	0.278047	0.289742	88.0773	0.917404	0.861994	0.93673	0.515808	0.258498	35.0911	1.03558	0.768898	0.356274	0.74982	59.4959	53.7279	6.32815	87.5782	515.783	2.45292	0.845925	0.511581	106.512	0.885238	0.682166	152.065	157.858	150.037	0.950453	0.939023
CADLAD_575	0	730.731	0.136532	0.681993	0.0480964	0.0732689	0.0304701	537.724	8.00242	494.233	0.930172	280.459	0.44343	64.9103	2.52993	1.35908	46.5272	1.10632	7.25209	46.0657	0.136671	0.0228516	95.577	0.949186	0.874328	0.954011	0.588268	0.368268	22.0924	0.983366	0.611575	0.2606	0.751297	3.16051	3.05422	43.5531	17.6181	678.605	1.90857	0.857578	0.655551	4.7711	0.859993	0.6635	5.40251	5.76624	5.08697	0.882198	0.842047
CADLAD_576	0	922.205	0.0727404	0.66746	0.157467	0.252342	0.1108	563.946	1.58906	560.6	0.967685	401.819	0.618023	198.27	0.274469	0.293704	159.777	0.261925	1.14759	132.405	0.411193	0.375621	114.76	0.74445	0.581924	0.777072	0.614773	0.272532	30.4574	1.53827	0.67107	0.518584	0.613934	35.5664	31.4273	12.2684	47.3427	531.562	2.71638	0.769333	0.402502	72.6007	0.86356	0.651079	81.1675	82.8201	76.0547	0.918311	0.926812
CADLAD_577	0	1062.32	0.0805332	0.617872	0.253929	0.699111	0.0856849	282.477	1.08579	509.745	0.855769	539.089	0.725245	187.298	2.25933	2.76343	281.437	2.00542	9.30358	214.384	0.359956	0.319668	115.882	0.537469	0.259627	0.493477	0.344577	0.097267	33.23	1.97793	0.524507	0.411759	0.638898	61.0188	55.2161	7.32447	101.949	512.817	4.31691	0.534169	0.164328	116.521	0.751421	0.787341	169.653	179.594	165.452	0.921257	0.926676
CADLAD_578	0	719.746	0.11748	0.806461	0.16488	0.519451	0.111182	316.309	1.69282	455.607	0.944476	504.913	0.766581	120.818	1.72143	2.36469	153.025	1.94792	10.2854	110.629	0.229067	0.251546	110.213	0.677631	0.455469	0.63375	0.510336	0.142392	30.729	1.52229	0.513062	0.462908	0.507919	53.3957	48.0587	7.48083	89.5878	527.652	2.53233	0.614448	0.468611	110.278	0.600266	0.364314	73.6886	101.138	63.1598	0.62449	0.562372
CADLAD_579	0	847.656	0.20699	0.67277	0.0458228	0.0632174	0.0320361	433.054	1.24694	504.325	0.951024	524.147	0.719603	173.344	2.21395	2.08213	203.548	1.49348	6.94526	163.949	0.26807	0.251662	78.1907	0.966139	0.940299	0.982617	0.382772	0.04061	50.929	1.84616	0.809022	0.734662	0.873184	113.023	108.912	4.01076	126.995	498.873	1.59111	0.98434	0.864787	145.434	0.964759	0.825748	170.315	174.562	160.634	0.920208	0.908848
CADLAD_580	0	1019.52	0.0922695	0.588535	0.0465295	0.0680973	0.0194697	352.668	1.63554	483.194	0.971406	445.38	0.890716	129.545	1.78319	2.48988	170.261	1.1075	5.32517	161.525	0.423244	0.403732	89.9322	0.899178	0.874509	0.959892	0.465502	0.14834	24.9822	0.772875	0.620405	0.26816	0.697378	64.5723	58.6723	6.58978	83.4107	539.783	2.27014	0.866288	0.501794	109.222	0.915879	0.568141	123.869	126.649	119.424	0.94295	0.916395
CADLAD_581	0	827.786	0.103694	0.69184	0.0556794	0.0918769	0.0240842	302.353	1.0356	475.871	0.92773	506.439	0.561319	235.103	2.92886	2.59244	268.28	1.43545	6.40633	286.851	0.507024	0.476026	104.988	0.745012	0.503169	0.690324	0.392172	0.0866502	33.0637	0.518284	0.347354	0.111013	0.669446	74.0187	65.8414	4.96178	124.134	524.084	2.54896	0.759312	0.468137	136.185	0.781023	0.53044	163.32	172.623	156.662	0.907537	0.893888
CADLAD_582	0	1195.18	0.0964391	0.626023	0.259607	0.506629	0.149821	289.068	1.12383	428.051	0.920099	524.159	0.54269	139.292	2.74552	3.14744	174.091	2.07584	11.864	134.118	0.213433	0.206097	105.6	0.745571	0.56027	0.775042	0.418273	0.458648	29.4254	1.69134	0.827631	0.501929	0.587585	50.7455	41.5542	7.16664	95.6242	493.931	4.00044	0.454893	0.183606	109.377	0.527522	0.372678	97.9403	123.589	83.7717	0.677824	0.619847
CADLAD_583	0	1040.45	0.107363	0.515728	0.334143	0.583553	0.0789142	500.74	1.23973	455.076	0.859498	598.163	0.413883	162.701	1.39542	2.52021	206.87	1.31421	6.54495	121.88	0.1923	0.221997	113.269	0.497183	0.209442	0.41433	0.391413	0.0849676	29.8467	1.1441	0.473379	0.221166	0.483667	49.0274	38.4455	6.41195	94.3406	508.532	2.50669	0.80505	0.681059	123.43	0.831089	0.637845	159.622	197.997	144.447	0.729539	0.731907
CADLAD_584	0	1207.19	0.0824263	0.58885	0.0853008	0.199264	0.0305875	297.218	1.14379	565.856	0.916251	476.024	0.533512	111.627	1.98696	1.7995	122.006	0.869117	15.2075	253.889	0.422289	0.353499	108.583	0.711496	0.494937	0.719765	0.394342	0.0776833	19.8725	0.367847	0.418546	0.118123	0.57091	38.8765	24.5807	8.16149	66.2348	461.068	2.45566	0.636297	0.27771	59.5268	0.702175	0.582316	57.7791	75.9225	47.3372	0.623494	0.587916
CADLAD_585	0	908.99	0.0861086	0.692877	0.111526	0.21571	0.0451559	275.446	1.56375	533.794	0.871717	620.248	0.576741	129.116	1.19433	1.7691	168.155	1.2023	11.7024	153.492	0.2316	0.239421	103.883	0.641154	0.409095	0.633322	0.339285	0.183762	48.0808	0.917131	0.702592	0.263468	0.598453	83.4435	70.1669	7.52933	102.185	571.294	3.13726	0.575889	0.406708	132.865	0.674365	0.418202	84.778	113.842	63.9029	0.561332	0.535729
CADLAD_586	0	693.423	0.0987597	0.530745	0.083483	0.134301	0.0383007	354.681	0.954067	441.648	0.886712	492.52	0.65198	102.308	5.04351	1.75807	161.782	0.646379	10.7153	184.451	0.308517	0.28303	99.8381	0.604139	0.310623	0.506909	0.354253	0.0633335	38.7261	0.889438	0.624604	0.395387	0.659612	86.5673	79.2814	6.32137	112.241	502.958	2.7571	0.569777	0.237505	124.941	0.506573	0.22053	115.051	146.16	105.218	0.719883	0.686139
CADLAD_587	0	917.996	0.0791892	0.423206	0.084328	0.159048	0.0350741	294.532	1.50567	472.234	0.957278	533.876	0.511334	66.9365	0.180921	0.930725	91.1499	0.178911	10.3298	153.899	0.28878	0.286015	115.277	0.46783	0.168981	0.357953	0.326357	0.0432732	36.8242	0.286739	0.276924	0.0481874	0.347709	57.5563	44.1388	8.81504	84.2741	591.079	3.81193	0.571136	0.246338	90.7801	0.461517	0.0695129	68.8593	110.13	45.8997	0.416779	0.429733
CADLAD_588	0	1078.54	0.0757561	0.45793	0.190303	2.53533	0.0727531	300.32	1.83753	492.534	0.92726	538.79	0.612413	113.622	1.3333	2.02782	112.298	0.499391	11.225	129.227	0.205318	0.207321	112.69	0.503103	0.216106	0.433501	0.602768	0.423663	21.9146	1.46425	0.713647	0.378711	0.615538	72.4298	66.5607	5.80063	104.045	591.058	1.18154	0.902066	0.864634	116.223	0.883902	0.831257	128.878	152.427	112.579	0.738574	0.722847
CADLAD_589	1	869.466	0.0785281	0.545967	0.0353057	0.0615691	0.00999132	364.161	1.18693	440.169	0.963784	540.136	0.472926	149.302	1.3073	1.606	197.357	0.898994	6.77006	236.415	0.397155	0.374939	117.26	0.407946	0.134022	0.319253	0.409181	0.212062	29.4473	0.541024	0.366886	0.126636	0.359685	50.6037	33.0208	6.76592	98.0268	504.881	2.95789	0.654378	0.399176	115.501	0.592394	0.264152	104.162	130.42	93.4534	0.716559	0.650498
CADLAD_590	0	976.879	0.104163	0.580651	0.282547	0.389919	0.17421	453.207	0.90701	545.087	0.97142	507.865	0.629922	119.029	1.42704	1.10015	212.37	0.737401	9.10059	192.889	0.311383	0.301752	102.5	0.823996	0.642156	0.827154	0.577049	0.402747	29.7599	0.579422	0.686568	0.170188	0.609316	53.3113	39.9928	6.93754	84.7867	494.032	3.25879	0.659211	0.327419	114.033	0.785428	0.575675	104.19	118.387	90.6409	0.76563	0.760232
CADLAD_591	0	514.684	0.123778	0.494806	0.10495	0.227103	0.0428792	317.536	1.68525	489.338	0.920054	513.602	0.45218	91.3143	0.626925	1.83535	273.65	0.989524	9.42379	222.537	0.391078	0.359978	120.86	0.475712	0.179189	0.371729	0.590904	0.287076	26.8889	0.51606	0.521094	0.10245	0.645861	45.6019	35.3367	9.95041	61.783	565.532	4.73599	0.738446	0.359094	75.9158	0.631748	0.164989	93.2227	105.035	80.4494	0.765929	0.795431
CADLAD_592	0	967.578	0.22596	0.844654	0.318557	0.447248	0.148236	689.432	1.22254	467.042	0.871416	552.095	0.713996	164.787	1.97139	1.57024	191.89	0.828528	11.1062	150.435	0.260876	0.269502	104.091	0.745479	0.530449	0.726455	0.495426	0.254609	57.0552	1.45956	0.913162	0.56484	0.671785	108.851	103.664	4.16248	132.916	516.161	1.71395	0.897793	0.706871	169.212	0.854862	0.652114	202.207	210.011	194.704	0.927113	0.919637
CADLAD_593	0	1042.48	0.0481235	0.511441	0.0645927	0.0876899	0.0224177	268.444	0.938104	416.549	0.978235	668.325	0.460487	144.091	2.49365	1.28048	155.825	0.666352	11.3284	227.728	0.362705	0.332965	92.3052	0.894492	0.777523	0.895603	0.424368	0.106918	26.1781	0.517699	0.368325	0.0910361	0.488408	56.1836	48.0015	7.20372	90.2068	528.353	3.59252	0.65204	0.287188	118.975	0.662528	0.630717	112.316	122.665	96.5543	0.787141	0.782601
CADLAD_594	0	1026.17	0.0309359	0.568054	0.100094	0.151986	0.0345833	306.929	1.27693	422.357	0.929216	486.149	0.431252	137.249	1.35769	2.52119	247.66	1.60893	13.0736	141.544	0.221667	0.232071	117.598	0.567886	0.352874	0.55521	0.532751	0.208042	31.7784	0.749903	0.478445	0.256768	0.514706	46.9053	38.582	7.66735	92.4114	507.823	2.44404	0.58413	0.576104	85.9134	0.74444	0.576337	90.9298	111.495	88.3044	0.792002	0.73876
CADLAD_595	0	1077.37	0.10577	0.732882	0.076686	0.140394	0.0452739	309.608	1.00809	422.965	0.964613	500.289	0.442582	97.9243	2.76276	2.10153	171.669	1.41137	11.1049	182.259	0.31848	0.269736	97.8777	0.7789	0.625119	0.826203	0.474534	0.108158	45.3064	1.74655	0.725603	0.593296	0.782332	67.4212	61.6164	6.97467	89.7141	508.607	2.86252	0.703044	0.383991	128.509	0.685417	0.514093	134.843	153.634	121.942	0.793717	0.745378
CADLAD_596	0	1088.93	0.081806	0.650163	0.0417571	0.0796647	0.0223455	328.343	1.16763	485.353	0.969256	598.401	0.722111	193.414	1.38823	1.59721	149.638	0.862677	8.97212	197.854	0.299113	0.30992	90.1852	0.896638	0.842177	0.929526	0.463987	0.0825256	30.4814	0.967992	0.650787	0.385001	0.802149	47.9807	39.5112	5.33673	93.3988	497.143	1.73146	0.945427	0.864553	131.213	0.967719	0.831165	131.188	139.595	118.925	0.851926	0.842992
CADLAD_597	0	957.09	0.136641	0.556138	0.0658893	0.113468	0.0230433	447.196	1.04243	467.701	0.946066	541.393	0.626778	106.411	0.795852	1.06627	189.102	0.68053	12.3368	195.657	0.317061	0.305978	91.8411	0.861598	0.797217	0.929825	0.605782	0.0918977	25.499	1.17775	0.728153	0.435133	0.739206	45.0227	40.124	8.32824	69.8338	525.284	2.54026	0.833182	0.510751	86.1225	0.901141	0.523872	92.3904	101.467	86.4256	0.85176	0.837432
CADLAD_598	0	1076.76	0.0328945	0.603367	0.0205825	0.0493792	0.0127704	468.554	1.12581	415.113	0.974764	511.906	0.507464	163.165	1.92291	2.21554	195.43	1.21264	6.33679	156.484	0.249289	0.223939	113.912	0.441527	0.152893	0.339637	0.49127	0.0965873	25.1884	0.856436	0.68789	0.325676	0.75642	44.3259	37.7171	10.3865	60.1051	519.109	4.2505	0.601761	0.17199	90.2552	0.908263	0.707449	115.759	122.988	105.124	0.854749	0.854818
CADLAD_599	0	984.757	0.0623432	0.632925	0.100461	0.179454	0.0300412	268.907	1.09297	464.573	0.956685	439.273	0.44197	102.787	0.0830566	0.0954652	151.693	0.0564316	0.781317	233.928	0.629315	0.646175	113.64	0.61563	0.358073	0.579651	0.468004	0.185818	35.2514	1.78291	0.683329	0.389109	0.534237	44.6847	26.8286	10.8612	60.1666	573.108	2.07495	0.49214	0.0445055	62.4054	0.646978	0.0799054	83.6583	96.6847	80.9187	0.836934	0.823354
CADLAD_600	0	1003.14	0.108836	0.728258	0.0499598	0.0910565	0.0211163	277.64	1.39002	483.443	0.928494	527.255	0.689294	133.335	1.10398	1.5084	132.179	0.55433	8.01956	204.522	0.326942	0.342442	98.0112	0.725765	0.522635	0.750504	0.218953	0.0102746	39.8881	0.80519	0.405773	0.188022	0.57245	69.5028	61.281	4.65087	120.959	517.481	2.13998	0.837307	0.782209	124.507	0.623136	0.294655	146.733	175.616	121.724	0.693127	0.653747
CADLAD_601	0	1193.89	0.0796504	0.518116	0.14969	0.276655	0.035282	275.381	1.01451	480.53	0.922727	618.646	0.424317	123.112	1.05038	2.59662	268.822	1.39002	13.8612	122.843	0.181067	0.177966	112.571	0.584544	0.33595	0.564924	0.514025	0.140699	31.6547	0.753811	0.477365	0.224234	0.580987	57.9502	52.9557	5.90978	105.874	518.763	2.47745	0.741394	0.707823	110.375	0.752791	0.508211	139.099	157.507	122.501	0.777746	0.762595
CADLAD_602	0	911.714	0.0900448	0.582667	0.0491817	0.0923261	0.00986652	278.466	1.52557	592.885	0.965798	396.52	0.00885109	113.322	0.0775472	0.750607	124.699	0.484909	10.6655	113.087	0.33746	0.0389628	104.925	0.839579	0.733282	0.864338	0.342238	0.112333	25.2775	2.07051	0.851048	0.599404	0.624053	35.9794	28.1016	15.6697	41.9958	555.22	2.44769	0.67375	0.238318	66.5936	0.693578	0.724842	35.4037	45.6451	28.4121	0.622457	0.602935
CADLAD_603	0	1111.71	0.0291464	0.478952	0.117866	0.181176	0.0451798	317.851	1.7816	466.452	0.938957	509.03	0.582106	124.532	0.813406	0.784406	128.081	0.4553	10.7187	149.739	0.235482	0.218142	111.067	0.631633	0.414061	0.673607	0.26575	0.080638	31.1451	0.305104	0.381224	0.0769748	0.400503	45.5516	25.9006	9.63425	83.8185	602.698	3.98673	0.572301	0.41776	115.562	0.476309	0.129125	82.0756	121.575	64.2832	0.528754	0.548902
CADLAD_604	0	1108.13	0.125475	0.716247	0.318993	0.629385	0.172639	338.074	1.00004	466.799	0.900953	526.327	0.735153	103.048	2.44098	1.17876	173.612	0.562051	14.5144	120.458	0.18397	0.18371	102.007	0.799955	0.627715	0.798677	0.36039	0.189157	31.1423	0.35504	0.276083	0.081059	0.371619	52.777	41.5258	6.72416	92.8958	504.876	3.11475	0.606421	0.325558	111.779	0.648151	0.388099	132.609	158.036	122.666	0.776186	0.796766
CADLAD_605	1	1033.65	0.0486692	0.614302	0.604788	3.20139	0.183207	298.174	1.03489	459.425	0.929316	514.386	0.504692	125.313	2.00664	3.35476	207.479	1.60933	10.5029	170.987	0.300407	0.260928	112.733	0.485011	0.268368	0.507723	0.35258	0.197925	36.4337	1.08458	0.466878	0.294097	0.484982	61.6683	57.2994	5.68404	108.378	544.757	2.27945	0.798629	0.606673	88.4986	0.706555	0.323155	100.07	135.995	90.7876	0.667579	0.645542
CADLAD_606	0	958.853	0.145082	0.629309	0.0543204	0.081559	0.0181958	288.01	1.08505	472.42	0.868031	598.07	0.463844	179.785	2.11849	0.212104	206.557	0.122422	0.334262	208.85	0.379304	0.366157	88.7432	0.917312	0.883786	0.919787	0.525468	0.0209891	31.0705	1.47913	0.82147	0.512474	0.79196	77.8899	73.4696	5.49292	100.202	523.775	2.23422	0.9017	0.562484	174.541	0.943514	0.737972	167.438	174.018	163.645	0.940393	0.945176
CADLAD_607	0	1080.15	0.0918695	0.623012	0.0295063	0.0499865	0.0153459	595.238	1.99562	443.029	0.985809	535.922	0.640448	106.051	0.453558	0.829417	106.031	0.433792	7.95298	183.077	0.305782	0.300952	106.513	0.647232	0.462715	0.70774	0.300859	0.00927086	29.4676	1.35405	0.503777	0.228628	0.434633	75.0155	61.3659	5.87501	104.002	515.665	2.09151	0.745169	0.634513	128.44	0.622061	0.372903	117.811	148.908	102.505	0.688379	0.660196
CADLAD_608	1	822.074	0.248302	0.811897	0.352897	0.606417	0.180736	446.387	1.04238	452.151	0.974121	525.254	0.70811	171.303	2.85114	2.07513	232.37	1.29064	6.56138	332.779	0.61671	0.56334	95.22	0.922221	0.879901	0.906716	0.611585	0.25539	62.0186	1.16619	0.699485	0.5825	0.913138	124.057	110.699	4.28221	130.568	516.291	1.87532	0.835017	0.836722	176.091	0.887137	0.81921	198.777	217.631	194.774	0.894974	0.823093
CADLAD_609	1	1072.86	0.0812108	0.44323	0.0176047	0.0429563	0.0115676	626.797	1.25421	524.963	0.973516	495.648	0.743122	181.376	3.48677	1.95957	203.033	1.33305	5.97306	261.572	0.509551	0.472551	94.7809	0.845893	0.738144	0.90447	0.467424	0.0423322	29.9165	1.31992	0.518348	0.309678	0.500077	61.4713	49.5406	6.81484	99.6585	546.126	2.55838	0.731301	0.458302	135.038	0.797262	0.607511	146.2	158.16	143.665	0.908351	0.897505
CADLAD_610	0	973.432	0.0816059	0.762071	0.0502568	0.0755253	0.0260626	330.971	1.31804	660.262	0.978862	560.072	0.651993	75.3967	1.45872	1.08276	80.3649	0.623405	7.48647	130.541	0.21165	0.221116	108.205	0.644393	0.426338	0.651557	0.345336	0.0229397	27.8928	0.47534	0.449737	0.133884	0.542923	40.1983	29.5139	9.23444	66.8732	522.915	2.59821	0.64878	0.335166	77.3876	0.617486	0.263825	71.8496	95.3624	55.6064	0.583106	0.639873
CADLAD_611	0	898.997	0.0721013	0.479986	0.155816	0.329781	0.053561	268.273	1.37903	505.315	0.891461	569.215	0.619792	182.156	1.33871	2.46725	251.558	1.92287	8.66125	178.714	0.278441	0.258139	108.355	0.562768	0.308074	0.541515	0.410057	0.0624113	29.2911	0.712828	0.378808	0.177242	0.502077	88.3855	82.4593	4.97887	121.87	552.054	1.32496	0.831682	0.7584	141.481	0.95716	0.74247	163.379	172.44	158.543	0.91941	0.940582
CADLAD_612	0	954.101	0.180892	0.806513	0.0798225	0.201296	0.0395553	298.991	1.05198	461.276	0.917563	620.998	0.843785	238.484	3.1044	2.41058	336.882	1.7549	7.3992	290.523	0.480011	0.439233	94.3317	0.842027	0.689817	0.840257	0.496739	0.173003	39.1431	1.14008	0.822488	0.413845	0.817326	101.43	98.2814	3.65534	139.959	493.476	1.59409	0.970851	0.819019	199.61	0.935088	0.919587	227.547	232.942	220.778	0.947781	0.969086
CADLAD_613	0	584.892	0.131197	0.404133	0.171135	0.733566	0.0366328	349.305	0.958005	409.196	0.955296	528.788	0.427404	117.348	0.589203	0.440972	203.17	0.260944	18.2402	225.588	0.358961	0.305727	113.261	0.659143	0.429555	0.65863	0.546603	0.0865219	26.4733	0.334008	0.45242	0.0644424	0.733564	55.486	45.8171	7.25268	79.9977	562.317	4.12338	0.737049	0.264726	106.406	0.75593	0.39499	79.1814	95.3684	67.8725	0.711688	0.716374
CADLAD_614	0	1219.91	0.0703087	0.455194	0.0426977	0.108035	0.0180242	387.99	1.2149	563.798	0.941307	585.373	0.576434	124.289	0.981726	0.718367	164.316	0.307888	11.5209	227.217	0.351021	0.333695	114.409	0.463083	0.190163	0.425171	0.29128	0.164238	46.2718	1.87131	0.593982	0.652933	0.447793	50.3909	31.3863	7.18156	104.223	546.999	4.44248	0.484846	0.0989415	133.205	0.679679	0.325254	84.2749	125.345	64.8164	0.517104	0.470098
CADLAD_615	0	1070.56	0.0698759	0.52633	0.0346197	0.0712933	0.0216144	293.773	1.23737	418.293	0.950155	523.836	0.355958	136.896	2.34906	1.08606	112.691	0.629616	12.8866	132.082	0.194328	0.16221	103.054	0.73572	0.589652	0.805512	0.30985	0.0311527	39.156	0.503528	0.287422	0.077348	0.366244	52.6821	33.7454	7.09837	97.8309	497.309	4.04046	0.477694	0.224286	121.504	0.599625	0.365281	123.157	161.495	104.105	0.644633	0.627761
CADLAD_616	0	1101.97	0.0704937	0.398194	0.0550561	0.0775838	0.0177245	325.224	1.29144	413.557	0.949803	593.218	0.596866	102.839	1.05012	0.697537	98.7965	0.431232	11.7157	151.888	0.265005	0.23492	97.5396	0.835116	0.715224	0.884493	0.471889	0.317371	28.5772	0.468188	0.526852	0.246281	0.596984	58.2205	56.3008	6.43425	90.3543	513.741	2.66531	0.783937	0.566087	93.5421	0.72158	0.477739	86.1475	114.263	76.9616	0.673551	0.579731
CADLAD_617	0	1084.19	0.245772	0.835116	0.516584	7.5534	0.280476	485.796	2.37957	655.49	0.91588	373.216	0.862476	102.98	0.727062	0.880433	85.4193	0.243614	13.2673	82.4188	0.217615	0.205603	100.417	0.881277	0.734387	0.885626	0.815652	0.305256	37.4521	0.483521	0.643823	0.492524	0.741689	40.8267	37.7821	8.80543	70.6519	573.874	1.66344	0.827972	0.806999	73.563	0.857795	0.688584	77.315	79.0806	73.5703	0.930321	0.962477
CADLAD_618	0	1050.34	0.177648	0.688611	0.273089	1.93064	0.0881417	352.278	1.68012	435.312	0.966415	600.959	0.645741	171.416	1.52006	3.1543	185.688	1.24432	7.0773	199.193	0.414279	0.410704	100.375	0.779357	0.638695	0.851797	0.666136	0.549935	45.2695	1.17912	0.835898	0.492212	0.87317	80.4979	77.0655	5.02797	106.775	518.05	1.73479	0.898412	0.843536	124.82	0.868871	0.702455	116.048	120.574	113.497	0.941308	0.906265
CADLAD_619	0	1225.9	0.111216	0.598819	0.437339	0.810005	0.149713	355.506	1.09284	549.398	0.961771	508.683	0.552202	67.2355	0.497688	2.73375	100.961	0.551379	12.2538	109.697	0.175516	0.159166	104.699	0.71549	0.487279	0.707184	0.679105	0.340792	26.0461	0.284701	0.510975	0.189729	0.555326	40.2024	26.4317	8.42151	69.4653	483.722	3.50038	0.64199	0.222115	83.7713	0.749392	0.462884	63.8109	79.5064	49.3061	0.620153	0.612466
CADLAD_620	0	998.112	0.128643	0.719277	0.230353	1.60047	0.0683218	510.535	1.34884	437.383	0.931497	523.667	0.600267	149.087	2.3645	2.12363	152.914	1.668	6.50471	193.452	0.332868	0.309724	99.5534	0.812072	0.619216	0.762936	0.274969	0.0960032	30.3578	0.487017	0.422203	0.177846	0.757087	56.7367	49.2785	6.42211	100.664	498.124	2.44716	0.628146	0.456712	121.109	0.763513	0.557541	122.365	136.713	115.008	0.841236	0.819546
CADLAD_621	0	1098.84	0.0830352	0.60326	0.0524659	0.102433	0.0131315	283.778	2.0606	408.569	0.948214	574.384	0.260167	134.729	1.78941	0.584816	84.6807	0.411732	20.8874	122.353	0.194458	0.197132	116.894	0.418655	0.198771	0.466849	0.462712	0.115702	28.5135	0.356902	0.294164	0.0563592	0.36488	57.1576	49.8287	13.2409	66.4933	602.214	5.80958	0.406384	0.0363281	99.5757	0.510047	0.324524	80.591	121.293	59.7203	0.492365	0.420964
CADLAD_622	0	629.273	0.130931	0.603938	0.179383	0.299877	0.0701435	312.716	1.41561	627.565	0.958989	533.001	0.731511	120.17	1.37293	2.16626	204.738	1.58632	4.46106	174.465	0.438723	0.413628	102.477	0.855637	0.718564	0.877854	0.306685	0.150716	36.8935	1.16899	0.729747	0.429205	0.617736	58.4167	48.8227	5.58788	107.211	490.059	2.40685	0.672894	0.466574	111.104	0.634451	0.474821	107.519	144.031	98.4949	0.683847	0.706074
CADLAD_623	0	1028.58	0.129744	0.757097	0.403678	7.42249	0.223503	317.218	1.51131	492.984	0.88141	503.072	0.870014	122.964	1.51892	2.66881	157.943	0.968446	9.58609	227.908	0.387864	0.370985	105.123	0.799366	0.639015	0.78315	0.67693	0.293571	33.6788	1.16475	0.721395	0.416153	0.827035	73.5886	62.3923	5.71765	98.5023	532.57	2.14144	0.83938	0.676972	159.111	0.725146	0.719741	124.497	134.184	106.234	0.791707	0.78087
CADLAD_624	0	902.78	0.0819919	0.468761	0.0884031	0.197481	0.0438851	699.905	1.98858	615.9	0.964034	522.906	0.769891	129.635	1.44014	0.926517	155.781	0.388123	9.72492	171.553	0.330639	0.309069	113.519	0.589109	0.332958	0.571801	0.254781	0.0303194	47.6771	0.553512	0.412487	0.130573	0.645189	58.6827	39.4069	7.5342	91.1397	570.768	2.97462	0.595883	0.249545	112.245	0.629767	0.339464	89.3843	123.903	72.336	0.583812	0.584034
CADLAD_625	0	628.658	0.151865	0.685141	0.11681	0.21263	0.0898734	303.957	1.10374	430.443	0.955225	537.845	0.655375	166.209	1.27707	1.73672	166.855	1.0188	6.20308	168.526	0.420895	0.436822	100.783	0.852235	0.726489	0.854815	0.357844	0.13012	31.9842	0.57761	0.453054	0.125589	0.512949	73.7729	64.5734	10.3587	66.1396	560.17	1.39282	0.633232	0.195353	101.605	0.663543	0.501099	89.0326	106.602	86.2434	0.809025	0.819331
CADLAD_626	0	994.663	0.0814435	0.680676	0.0731026	0.135516	0.0305543	317.773	1.65238	473.249	0.938775	503.787	0.665841	115.41	0.496291	0.461235	145.691	0.249696	5.49635	210.881	0.375869	0.353317	101.617	0.765542	0.615902	0.821846	0.300431	0.0385339	25.2616	0.332013	0.411854	0.0772397	0.589381	73.2796	62.3361	4.9717	127.808	590.918	2.3609	0.780176	0.479131	149.036	0.752972	0.493042	119.485	142.93	104.747	0.732856	0.70168
CADLAD_627	0	1126.15	0.037616	0.548482	0.0165246	0.0265017	0.0100878	545.629	1.31521	570.618	0.938874	482.565	0.393705	93.0655	0.854751	1.1859	276.333	0.815855	12.0128	133.163	0.198345	0.187761	120.493	0.455845	0.155917	0.330717	0.370961	0.0583152	26.4266	0.591169	0.403547	0.0715944	0.406503	42.0051	24.8999	9.50213	81.5071	619.621	5.79434	0.390467	0.0865065	86.635	0.439717	0.206151	71.283	80.6147	48.6161	0.603067	0.608938
CADLAD_628	1	1060.85	0.05007	0.8119	0.170765	0.346407	0.0394931	467.643	1.40303	449.205	0.826619	518.608	0.4789	177.841	2.25318	2.61196	265.989	0.991671	7.57463	161.895	0.274234	0.27859	114.445	0.44085	0.183199	0.408983	0.392029	0.0791935	31.048	1.59649	0.746127	0.717997	0.733227	66.189	63.8724	8.45015	72.5751	509.726	2.11563	0.734777	0.473042	102.9	0.789893	0.542779	127.754	131.664	123.139	0.935255	0.872869
CADLAD_629	0	1046.88	0.0655398	0.543291	0.0698488	0.098581	0.0275641	397.889	0.87579	417.149	0.989869	539.182	0.485219	172.111	0.72424	1.65111	258.345	1.30788	9.83376	187.094	0.302204	0.286344	107.895	0.526783	0.288435	0.505193	0.361074	0.223944	38.5936	2.12842	0.607454	0.775972	0.512742	55.1661	42.8941	6.14237	104.38	438.779	2.57598	0.587035	0.346277	137.982	0.643337	0.723693	99.2661	137.047	76.1532	0.555673	0.50016
CADLAD_630	0	1291.2	0.173052	0.717062	0.813223	2.19702	0.42414	585.433	2.68957	579.561	0.914112	469.287	0.594557	161.016	1.50006	2.00806	172.99	0.976723	10.7314	229.929	0.461039	0.484128	116.736	0.681964	0.449017	0.660325	0.673901	0.403632	38.3787	0.524208	0.4435	0.147068	0.708949	49.2657	40.7207	11.8696	55.4404	608.165	2.05526	0.791971	0.195032	89.5649	0.832021	0.795514	96.6254	123.204	89.7282	0.728288	0.704117
CADLAD_631	0	755.416	0.263317	0.754605	0.168929	0.29048	0.102828	324.355	1.37451	559.891	0.958514	418.198	0.8133	143.828	2.70421	2.42871	219.897	1.23769	8.90167	202.192	0.374119	0.366688	88.2883	0.874822	0.780633	0.904355	0.549412	0.113666	60.0732	1.19065	0.826367	0.515776	0.943692	121.752	110.465	3.80537	144.011	530.351	1.37066	0.925538	0.879961	162.417	0.930683	0.745314	170.273	180.84	160.892	0.889697	0.882785
CADLAD_632	0	686.532	0.113751	0.48143	0.133767	0.25369	0.0287088	411.281	1.63065	423.379	0.869417	522.584	0.571542	89.961	0.764842	0.607734	179.053	0.310979	7.80768	246.976	0.431129	0.419258	117.856	0.479558	0.235446	0.476576	0.335357	0.0476946	20.2534	2.26654	0.528311	0.752688	0.489188	37.8243	25.9971	11.4029	60.9398	588.137	3.31876	0.584324	0.474751	72.6167	0.476766	0.196222	60.8125	84.248	44.5886	0.529254	0.484474
CADLAD_633	0	952.222	0.0713384	0.520982	0.0375762	0.121967	0.0216119	285.921	1.71951	446.196	0.959682	544.376	0.721699	209.026	2.62946	1.35082	154.026	0.848534	9.3752	153.56	0.277221	0.275631	89.6141	0.919991	0.860475	0.952038	0.365866	0.154556	22.0193	0.358006	0.53763	0.0872898	0.662617	43.1662	39.3049	9.20991	65.3075	498.492	3.03722	0.808298	0.395316	96.9218	0.823376	0.693793	98.7599	106.758	94.0663	0.881118	0.87982
CADLAD_634	0	946.102	0.0943475	0.569101	0.0785118	0.149243	0.0254318	269.26	1.76269	422.654	0.936503	571.199	0.492422	141.52	2.9217	1.70066	199.518	1.0702	13.1556	170.918	0.248789	0.252519	110.356	0.673487	0.453551	0.655812	0.425065	0.161997	28.158	0.318797	0.389163	0.0685671	0.484565	45.5397	32.8504	8.97523	67.1492	563.726	3.97621	0.742435	0.309509	86.2911	0.669798	0.252572	93.687	110.143	84.7064	0.769061	0.688719
CADLAD_635	0	1042.76	0.0698124	0.515843	0.120291	0.193086	0.0508007	512.019	1.14559	465.643	0.924581	467.832	0.727933	98.5874	1.76466	2.30631	127.442	0.98502	12.7134	149.579	0.228161	0.224774	112.694	0.519911	0.237367	0.469993	0.404095	0.0377445	37.7435	1.2451	0.589926	0.410208	0.617493	53.4048	42.1429	6.72408	89.3658	494.084	3.35244	0.667045	0.34157	115.281	0.673434	0.449552	106.713	129.491	94.0827	0.726558	0.733046
CADLAD_636	0	1186.39	0.101654	0.738521	0.208037	5.41603	0.035228	523.26	1.23226	496.834	0.833698	491.031	0.522417	95.7197	1.4205	1.33329	78.4597	0.25947	8.36866	107.343	0.154287	0.134095	116.145	0.743251	0.550257	0.723225	0.470225	0.0244269	46.0919	1.00489	0.714538	0.380657	0.787918	51.0761	40.053	5.50893	106.625	527.991	2.67468	0.771325	0.484697	87.4773	0.794976	0.482778	115.497	123.359	102.005	0.826893	0.826434
CADLAD_637	0	1164.24	0.0644402	0.444899	0.05193	0.0745437	0.0189104	450.522	1.05709	460.007	0.914649	568.285	0.416878	182.94	1.92934	1.39466	233.623	0.939082	11.5983	129.792	0.237634	0.218645	118.686	0.459083	0.188596	0.358499	0.321669	0.113567	29.0447	0.809393	0.40808	0.137899	0.563688	54.6837	46.8608	6.70549	92.9719	520.359	3.43615	0.569963	0.289969	91.687	0.678273	0.434135	91.4334	105.978	81.921	0.772997	0.728869
CADLAD_638	0	1083.52	0.0436539	0.642558	0.0308631	0.0997488	0.0109454	357.727	1.18316	506.845	0.927599	565.877	0.692057	155.755	2.03706	2.35807	279.344	1.93438	12.6531	95.7534	0.155519	0.150915	110.628	0.672415	0.449562	0.663557	0.425026	0.0108076	30.8825	0.918138	0.686018	0.213479	0.743647	52.2103	45.5575	7.52224	72.5988	499.512	3.75631	0.721575	0.298432	115.826	0.818626	0.447611	156.697	160.667	154.431	0.961186	0.931931
CADLAD_639	0	1852.16	0.0614714	0.627764	0.0809296	0.17368	0.0220024	593.616	0.952402	460.392	0.942874	635.22	0.610395	206.788	0.875677	2.2102	184.934	1.10735	12.1487	158.162	0.26252	0.24708	121.983	0.451826	0.202732	0.435939	0.37556	0.181589	34.9448	0.793624	0.506709	0.338983	0.695879	62.9908	50.6255	8.67419	91.0331	479.759	4.19941	0.408137	0.161753	109.914	0.444006	0.271539	79.8614	105.903	68.036	0.642437	0.594728
CADLAD_640	0	1047.87	0.0416033	0.527571	0.0899926	0.119393	0.0245382	667.183	1.50081	640.68	0.944111	567.05	0.333183	120.362	0.947831	1.67299	159.503	0.886836	11.7877	127.483	0.200439	0.169687	102.778	0.834897	0.735033	0.893018	0.37061	0.0965383	28.0546	0.528449	0.500169	0.191809	0.638061	44.9315	30.042	10.7294	79.755	628.423	4.62827	0.479056	0.267562	92.4412	0.544704	0.177888	80.2975	105.47	66.6837	0.632254	0.608397
CADLAD_641	0	1065.61	0.0603434	0.349452	0.0494119	0.146822	0.0241823	344.12	1.42315	440.419	0.922963	536.282	0.422666	111.354	1.90392	2.02339	163.664	1.25026	13.9481	188.872	0.344949	0.299123	123.936	0.602222	0.395279	0.658556	0.417935	0.184465	36.5411	1.37179	0.63502	0.449217	0.779142	48.1615	39.8206	9.34926	66.1321	472.857	3.4596	0.583559	0.299353	80.3506	0.601902	0.319599	78.7318	95.661	66.9522	0.69989	0.662961
CADLAD_642	0	868.079	0.240639	0.857954	0.609174	3.44429	0.284098	406.406	1.39119	439.009	0.840349	531.053	0.725613	161.629	2.7308	2.26763	271.573	1.06603	9.17789	176.015	0.298317	0.26988	104.994	0.659645	0.446063	0.699879	0.461457	0.340028	48.3146	0.951142	0.518867	0.317012	0.6388	71.3323	65.26	4.04436	133.567	517.69	1.82781	0.927256	0.850892	130.313	0.880724	0.674743	161.754	179.354	157.038	0.875579	0.930435
CADLAD_643	0	1239.94	0.175892	0.73793	0.622937	5.19962	0.377192	344.413	1.53551	544.711	0.927577	436.756	0.749833	162.182	1.81606	3.33794	203.211	2.34515	6.78745	262.606	0.487004	0.439168	113.107	0.536865	0.292861	0.511113	0.593632	0.230949	34.8755	0.433023	0.321287	0.0804681	0.69	63.496	56.8322	5.81728	104.35	513.157	2.21247	0.719528	0.635275	121.891	0.839185	0.734535	119.514	131.947	116.026	0.879334	0.853387
CADLAD_644	0	1021.85	0.0321986	0.533891	0.391769	2.75142	0.0777771	444.256	0.961973	556.923	0.791091	545.358	0.571594	57.7008	0.964024	3.35466	164.941	1.77855	12.8094	101.463	0.166052	0.173085	117.935	0.525003	0.258952	0.486707	0.492611	0.0759417	38.2216	0.615376	0.528183	0.193579	0.524377	56.3832	40.2806	8.22073	93.5052	478.379	4.08969	0.452924	0.178741	113.3	0.52127	0.20113	74.9926	119.372	53.815	0.450819	0.483669
CADLAD_645	0	1104.46	0.0802319	0.576321	0.076087	0.137035	0.0239276	302.983	1.17735	446.661	0.983366	531.376	0.175419	186.461	1.29568	0.972053	250.351	0.770026	6.45659	223.278	0.341476	0.333054	113.178	0.760782	0.510662	0.761016	0.695302	0.538568	35.5068	1.71787	0.603308	0.643468	0.664308	55.2958	47.119	8.92601	73.6613	529.862	2.71376	0.674244	0.470762	76.539	0.799388	0.356149	89.9659	108.989	80.241	0.736233	0.733182
CADLAD_646	0	1147.42	0.0957009	0.652887	0.452762	0.869282	0.089361	385.384	1.00244	521.994	0.923818	553.903	0.433656	165.204	1.13412	2.61268	183.069	1.30326	8.60782	133.943	0.220927	0.204097	111.157	0.660156	0.443992	0.644747	0.387148	0.190384	30.6797	0.620197	0.700312	0.622983	0.699132	58.8047	55.2288	6.63382	92.7269	494.458	2.26821	0.734133	0.638534	132.697	0.822242	0.808023	111.212	134.767	95.9817	0.712207	0.718066
CADLAD_647	0	948.387	0.0740672	0.577868	0.0299009	0.0482901	0.0162623	299.246	1.32329	448.813	0.857963	673.134	0.570071	134.978	1.84019	2.00426	136.166	0.933784	15.5025	207.961	0.302865	0.287437	89.763	0.930731	0.896457	0.941737	0.372014	0.071934	31.6092	1.71537	0.582308	0.46389	0.670602	54.3448	46.5582	4.78654	122.288	539.538	2.19966	0.867509	0.595132	130.142	0.913606	0.55068	148.103	155.56	130.334	0.837837	0.86948
CADLAD_648	0	911.273	0.100679	0.655459	0.0944644	0.191999	0.035246	557.879	1.84516	535.546	0.987333	574.541	0.416386	161.093	1.61254	1.46491	219.571	0.686414	10.6965	164.678	0.252492	0.232852	95.9749	0.834959	0.728837	0.860364	0.473853	0.108511	34.5556	0.652641	0.47148	0.15898	0.667198	64.8076	55.9039	6.98037	101.245	556.769	2.84882	0.643907	0.33668	127.539	0.741726	0.417735	137.549	157.464	130.209	0.826913	0.77861
CADLAD_649	0	1177.57	0.0893497	0.768559	1.07613	3.91825	0.160879	375.623	1.50352	495.349	0.794756	474.073	0.654465	120.16	0.473924	3.04281	197.047	0.295938	10.6992	246.28	0.431051	0.357874	112.59	0.296952	0.0757142	0.253908	0.521477	0.408497	31.2547	0.489008	0.375424	0.121421	0.720998	67.7931	63.8673	6.55038	102.319	543.054	2.36363	0.673908	0.602036	130.322	0.663031	0.382481	90.9421	103.182	84.7523	0.821387	0.817135
CADLAD_650	0	786.814	0.104108	0.51752	0.0895238	0.105459	0.0582383	288.456	1.09121	501.267	0.964092	460.167	0.583288	167.953	2.58192	2.3837	192.431	1.6108	9.34914	240.98	0.402062	0.405628	114.336	0.660219	0.470747	0.687485	0.4469	0.255351	53.9034	2.31441	0.677434	0.777519	0.515474	61.1649	52.0338	5.98675	107.478	498.887	2.85882	0.639049	0.415343	136.553	0.786086	0.808458	145.305	163.798	132.87	0.811185	0.7713
CADLAD_651	0	1039.75	0.121427	0.615136	0.0380919	0.0692245	0.017534	398.205	1.48363	457.495	0.972699	497.612	0.611343	124.959	3.00699	2.97051	180.418	1.81725	7.4295	156.731	0.256077	0.250214	106.268	0.659625	0.413432	0.659221	0.559695	0.18278	36.2884	1.54389	0.803449	0.562438	0.801568	67.0306	61.3476	5.7697	95.0015	515.902	2.29357	0.868141	0.477182	99.121	0.883091	0.516565	105.105	110.779	102.262	0.923116	0.918164
CADLAD_652	0	869.644	0.0796102	0.48908	0.103111	0.188998	0.0289948	285.03	1.26819	548.215	0.959445	543.917	0.584767	99.9376	1.29155	2.27007	236.126	0.85422	14.0119	121.199	0.189204	0.210353	89.215	0.960684	0.927802	0.960338	0.549507	0.346613	23.3168	0.543638	0.546547	0.297696	0.759327	47.6346	41.6266	8.57312	68.4938	567.152	3.07605	0.85391	0.341106	73.9026	0.748748	0.604609	73.6173	87.6738	66.0099	0.752903	0.742534
CADLAD_653	0	1327.31	0.0739784	0.587118	0.106381	0.183069	0.0422444	360.788	1.08576	436.011	0.956821	572.384	0.576342	123.127	2.24869	2.72614	177.244	1.45066	8.18557	175.441	0.3231	0.334178	111.803	0.826648	0.714511	0.85506	0.666223	0.0234795	27.021	0.830672	0.522132	0.138183	0.713151	51.7148	42.7139	7.08519	74.963	489.4	3.09554	0.852183	0.497552	90.3802	0.81301	0.481349	100.227	107.253	96.2422	0.897342	0.871161
CADLAD_654	0	1569.05	0.140223	0.669108	1.18624	4.53943	0.307439	360.528	1.97825	471.991	0.896577	328.229	0.343062	114.746	0.0957244	0.43115	103.98	0.0647712	13.6907	167.45	0.339805	0.325472	129.359	0.355361	0.0983675	0.280156	0.540077	0.591679	22.2362	1.37479	0.6484	0.668137	0.598115	37.9035	34.039	12.7777	44.7292	524.12	2.12464	0.81487	0.772898	47.4562	0.799998	0.337029	48.9267	51.3731	43.7949	0.852486	0.815708
CADLAD_655	0	1210.62	0.072969	0.521298	0.0612675	0.122562	0.0254994	268.799	3.35467	576.846	0.817367	290.877	0.638923	76.0648	0.945449	2.37185	140.264	0.683761	5.3411	68.6203	0.292654	0.0933601	116.32	0.562996	0.279264	0.494829	0.413882	0.0675573	30.6014	1.46946	0.616822	0.386312	0.588226	28.0458	20.9739	15.2961	57.6322	627.997	4.7857	0.576823	0.0633414	47.1835	0.639513	0.251487	51.6896	53.3156	45.3746	0.851056	0.858651
CADLAD_656	0	957.533	0.0738814	0.448614	0.0966556	0.188265	0.0246012	271.862	1.41971	592.676	0.959947	533.411	0.619446	177.806	1.675	2.53534	358.506	1.55832	13.1517	181.544	0.285037	0.251045	103.688	0.900297	0.754992	0.8609	0.498348	0.0757876	27.1559	0.235774	0.542213	0.153198	0.564403	44.9227	34.7898	11.1387	64.8932	617.832	3.81452	0.549496	0.238692	92.1953	0.595117	0.179457	99.6309	121.551	88.7219	0.729917	0.743094
CADLAD_657	0	1094.7	0.0729305	0.485977	0.0997562	0.156466	0.0190652	458.036	1.32143	455.988	0.950429	438.885	0.446847	107.621	0.673328	1.20758	194.588	0.465104	6.33331	140.85	0.303661	0.347871	99.8466	0.731515	0.540047	0.772916	0.54108	0.21528	29.7791	1.04206	0.510658	0.321439	0.781487	55.9614	49.9053	11.1663	53.3785	508.654	2.16043	0.811533	0.46029	74.6587	0.83679	0.496004	78.9028	88.1432	74.1355	0.84108	0.762824
CADLAD_658	0	1106.42	0.0700933	0.358711	0.188602	0.271529	0.0411041	272.251	1.17345	419.286	0.967817	516.633	0.459615	212.732	3.19153	1.83562	234.118	1.43033	5.41199	364.455	0.650208	0.609557	102.355	0.845875	0.676609	0.835731	0.448373	0.344329	32.6815	0.98251	0.502483	0.287528	0.439984	47.7443	35.5494	5.7746	112.415	550.188	2.95457	0.745207	0.591676	93.5688	0.573977	0.369785	85.5126	121.046	76.4158	0.631298	0.588349
CADLAD_659	0	875.504	0.0370196	0.479479	0.0407436	0.129754	0.00919402	666.751	0.888504	383.148	0.942046	603.934	0.2881	227.119	2.6149	2.99235	331.859	2.43909	5.98647	244.166	0.406293	0.334938	89.4926	0.889953	0.814402	0.90865	0.34845	0.0399514	31.1413	0.744645	0.533799	0.167347	0.668824	70.5208	58.8628	6.36014	98.3809	510.43	4.27857	0.502531	0.169625	125.441	0.524793	0.260722	121.451	138.501	107.804	0.778363	0.78781
CADLAD_660	0	1185.26	0.0724108	0.607028	0.0256938	0.0419729	0.00923919	445.815	0.910326	440.259	0.816362	502.818	0.756724	190.296	3.35241	0.185354	222.042	0.0300165	9.60125	169.87	0.324764	0.319165	107.196	0.801705	0.624364	0.79203	0.318424	0.0659624	23.4714	0.714798	0.491274	0.161292	0.83586	68.7721	61.093	7.69313	77.7887	511.909	2.28456	0.747191	0.574128	88.3104	0.67916	0.403781	87.4533	96.2662	77.7029	0.807167	0.857643
CADLAD_661	0	757.645	0.285495	0.658095	0.0810943	0.15608	0.0534117	270.686	1.08393	363.964	0.901965	448.425	0.260014	154.133	1.52061	1.19407	299.534	0.980701	5.08036	406.225	0.791237	0.683726	106.595	0.624485	0.395084	0.661375	0.371997	0.0372332	43.1219	0.928237	0.415598	0.291389	0.487287	86.0517	74.2945	6.10256	112.656	514.159	2.42026	0.555308	0.27973	119.435	0.376239	0.166432	83.4136	128.544	62.7695	0.488311	0.448862
CADLAD_662	0	921.953	0.0751423	0.294436	0.0665513	0.195807	0.0429885	749.517	1.74718	435.665	0.958523	607.9	0.409738	117.669	0.584356	0.58166	168.452	0.352207	11.6178	141.318	0.214448	0.18527	93.6527	0.893654	0.813416	0.892004	0.446445	0.0898669	40.8528	0.527791	0.523637	0.143471	0.577595	50.0472	40.6851	7.24246	79.8495	532.474	2.65493	0.810592	0.553033	128.935	0.88296	0.596801	102.151	115.001	93.6613	0.814436	0.799514
CADLAD_663	0	857.072	0.17534	0.711327	0.15073	0.181606	0.0940987	258.961	1.22079	512.245	0.976452	404.336	0.798892	213.926	1.97368	1.80414	222.639	1.67019	5.34504	225.238	0.432538	0.444824	98.9428	0.791628	0.626381	0.812365	0.295148	0.082405	56.7115	1.2964	0.697477	0.453581	0.666675	124.834	112.825	3.83891	146.853	501.628	1.86316	0.821887	0.68248	164.738	0.864147	0.678032	213.17	222.035	203.664	0.917263	0.886359
CADLAD_664	0	1110.27	0.062105	0.500907	0.0180596	0.0368476	0.00904497	424.569	0.929755	422.597	0.968859	563.478	0.585969	162.388	0.895939	2.1018	146.754	0.94366	7.98207	196.646	0.312349	0.295533	98.4617	0.844458	0.718987	0.842498	0.308189	0.0167439	31.2288	0.892504	0.621929	0.173621	0.859959	67.7122	61.1234	6.52358	98.603	490.485	3.20307	0.583573	0.259718	149.714	0.678277	0.513463	134.727	150.6	130.305	0.865236	0.825878
CADLAD_665	0	789.901	0.0911625	0.654995	0.2059	0.288146	0.0752493	463.179	1.26816	637.442	0.938596	474.58	0.69075	122.565	1.31023	1.52976	246.784	0.672967	7.49957	213.009	0.352321	0.338943	100.73	0.787825	0.644416	0.799748	0.603678	0.175992	30.3108	1.43474	0.590881	0.39312	0.632102	48.1902	42.0294	7.99427	90.6045	570.287	2.57384	0.668391	0.418975	128.188	0.696603	0.522238	117.255	142.098	106.189	0.747291	0.721352
CADLAD_666	0	1117.68	0.107543	0.559948	0.0237837	0.0434508	0.0173306	330.533	1.12223	432.568	0.904251	573.707	0.328362	116.141	1.71066	0.889262	105.78	0.322871	10.0364	182.682	0.277169	0.253678	100.147	0.663391	0.428647	0.663386	0.328411	0.00913064	37.4479	1.08859	0.725163	0.289934	0.805087	51.9429	44.1144	4.21895	134.419	507.27	2.23257	0.781706	0.488647	154.73	0.829571	0.649633	125.4	128.036	107.777	0.841772	0.821556
CADLAD_667	0	785.729	0.0713391	0.372989	0.0440505	0.0667951	0.0254474	268.863	1.67189	535.178	0.964843	498.543	0.562661	105.365	3.60849	3.3818	181.889	1.70114	13.0425	110.539	0.17739	0.166039	110.688	0.709288	0.494412	0.713012	0.468981	0.0175236	41.3068	1.08805	0.514934	0.445997	0.633693	59.5585	44.6488	7.55413	86.3542	507.747	2.11371	0.712099	0.549562	95.7683	0.657653	0.444289	73.7763	89.8349	66.3364	0.738425	0.750415
CADLAD_668	0	1173.06	0.0401217	0.509774	0.0299784	0.0410469	0.0157073	500.853	1.34475	430.342	0.978277	533.291	0.226394	161.766	3.02517	0.57041	183.844	0.337211	10.1518	180.963	0.26954	0.27024	111.912	0.453534	0.1784	0.38671	0.309518	0.0728473	31.1374	1.67939	0.443572	0.423677	0.651108	48.7004	35.2051	7.52058	97.0792	558.373	3.88983	0.612951	0.228944	117.223	0.591192	0.454105	87.155	125.214	72.1364	0.576105	0.502641
CADLAD_669	0	1147.67	0.100405	0.688888	0.285112	0.499205	0.102883	285.106	1.50965	432.257	0.905623	616.001	0.818887	157.995	2.30838	2.11289	253.264	1.70616	6.65628	206.576	0.367246	0.381352	95.3212	0.865279	0.778003	0.895651	0.43728	0.177903	25.7308	1.06823	0.53335	0.265677	0.67939	49.1268	42.3739	9.04433	69.2441	546.367	2.39951	0.75197	0.585618	111.215	0.845679	0.759278	145.074	155.928	129.478	0.830373	0.828504
CADLAD_670	0	1253.99	0.0879903	0.651293	0.113256	0.240576	0.0290361	321.63	1.50456	442.145	0.95732	543.381	0.380393	117.3	2.52977	1.53775	109.476	0.827497	18.0875	102.663	0.165446	0.1489	118.784	0.508369	0.230353	0.437328	0.341695	0.0721338	34.0964	1.53266	0.520107	0.308542	0.656827	49.306	40.3403	7.75573	96.0942	616.723	3.13043	0.623727	0.47281	111.535	0.531902	0.326066	87.7717	120.844	66.256	0.548279	0.548582
CADLAD_671	0	1136.14	0.0750567	0.690951	0.0569335	0.178272	0.0198482	382.51	0.972891	428.597	0.890705	565.312	0.424987	200.472	2.13114	4.12883	286.891	1.07044	4.84715	178.339	0.283	0.263317	112.616	0.388228	0.137039	0.3584	0.398894	0.0690055	31.8151	1.44353	0.713821	0.383498	0.797831	61.196	56.6005	7.253	96.4193	504.308	3.24327	0.528857	0.341254	104.492	0.656082	0.380703	103.264	131.49	84.6314	0.643634	0.657555
CADLAD_672	0	820.105	0.113788	0.59234	0.188755	0.235106	0.0673526	300.085	1.5389	413.33	0.914551	538.778	0.722181	139.87	1.12667	0.634483	225.077	0.348169	7.62403	192.291	0.314942	0.322417	108.052	0.774456	0.600962	0.786877	0.618611	0.203764	30.9438	0.532764	0.544058	0.168697	0.712488	69.156	64.7653	4.72871	107.075	491.527	2.22505	0.921323	0.614568	118.202	0.877923	0.531262	113.912	128.196	101.998	0.795648	0.802288
CADLAD_673	0	1058.53	0.0723612	0.59682	0.0557704	0.0888127	0.0183777	266.982	1.3837	617.532	0.931602	558.513	0.407853	159.093	2.25457	2.21637	242.359	1.14273	9.90509	126.813	0.190795	0.214068	106.37	0.743655	0.576082	0.783172	0.294493	0.0294569	40.0196	0.98671	0.391217	0.237201	0.445519	56.8039	40.0983	5.8354	111.733	583.15	3.66511	0.710817	0.200765	123.293	0.607037	0.311009	123.436	160.289	108.669	0.677958	0.653004
CADLAD_674	0	853.561	0.135605	0.537624	0.0994215	0.256882	0.0391487	370.122	0.997195	432.184	0.965096	673.294	0.418	155.333	2.98125	1.83546	255.985	1.13834	9.11869	187.107	0.304768	0.319149	113.183	0.477202	0.181597	0.375721	0.434984	0.289809	25.0584	0.713628	0.499241	0.118004	0.721449	58.8851	48.9263	6.55028	80.2972	521.272	3.34622	0.767889	0.321613	96.8134	0.799176	0.418172	159.786	176.972	152.89	0.86392	0.902401
CADLAD_675	0	928.53	0.126607	0.516337	0.108401	0.228033	0.0691935	324.484	0.975506	419.265	0.977357	467.262	0.365262	113.882	4.52462	1.18073	252.316	0.543387	6.98945	165.034	0.277617	0.29352	95.668	0.881816	0.791534	0.914078	0.432672	0.0860693	24.9477	0.982237	0.521543	0.218959	0.82408	45.435	37.2456	9.24001	66.3513	491.705	3.62655	0.689598	0.224396	80.048	0.614796	0.20553	109.817	116.828	103.191	0.883273	0.896373
CADLAD_676	0	767.477	0.160482	0.787015	0.0799984	0.128297	0.0468337	413.008	1.54179	562.954	0.94658	595.325	0.50323	173.008	2.04572	1.99284	207.751	1.06433	8.16915	164.041	0.263113	0.24666	99.4612	0.732815	0.557479	0.745371	0.376793	0.0481021	36.8847	1.43216	0.615105	0.34462	0.656864	96.4489	92.2825	4.56303	134.341	565.161	1.35687	0.880686	0.86397	141.049	0.821571	0.650722	169.402	176.686	159.97	0.905391	0.888217
CADLAD_677	0	1064.26	0.0527371	0.527276	0.0833327	0.118502	0.0268259	329.333	0.966368	417.318	0.974391	598.158	0.488332	161.074	2.88583	2.89913	296.397	2.61091	9.89879	214.486	0.329462	0.267065	114.152	0.502251	0.208647	0.422685	0.298482	0.0632206	34.008	0.756497	0.393337	0.189638	0.405555	60.9567	50.2253	6.6057	103.722	511.09	3.90153	0.542008	0.282808	120.658	0.390074	0.117842	102.128	142.809	80.0398	0.560466	0.534416
CADLAD_678	0	867.445	0.179086	0.827729	0.11029	0.153228	0.0815045	312.79	1.3793	485.065	0.954766	452.377	0.798322	161.145	2.5865	2.25446	207.608	1.50099	7.81057	198.63	0.470235	0.488092	94.1551	0.812168	0.677286	0.873088	0.458895	0.211557	31.8356	1.10437	0.721538	0.26899	0.784983	100.722	99.8356	4.30936	127.491	503.742	1.77016	0.876934	0.7594	140.226	0.883946	0.683691	155.14	157.392	143.321	0.910599	0.927003
CADLAD_679	0	1142.02	0.0859511	0.582709	0.0340272	0.0711758	0.0124295	280.155	1.54731	501.939	0.947539	553.632	0.595733	172.208	1.15459	1.59331	194.653	0.788589	7.98533	237.804	0.408307	0.379085	96.1236	0.862012	0.785641	0.905888	0.46088	0.117099	28.1195	1.50088	0.819543	0.600342	0.710516	53.4473	48.0066	8.02325	65.3743	506.827	2.65917	0.871484	0.542029	85.0829	0.845274	0.873278	100.065	108.665	87.9607	0.809464	0.832857
CADLAD_680	0	949.121	0.123989	0.546332	0.15427	0.298437	0.0454104	287.924	1.04553	451.652	0.936335	483.39	0.575789	120.86	1.9044	2.21378	234.258	1.74128	9.90529	132.904	0.228988	0.211718	105.026	0.813892	0.79732	0.911531	0.456192	0.185591	36.232	0.553394	0.417042	0.316069	0.596336	60.5859	54.7015	6.88767	96.8561	530.605	3.79806	0.487381	0.174038	112.306	0.579931	0.317103	161.877	175.32	141.252	0.805683	0.854748
CADLAD_681	0	1035.98	0.0995163	0.810071	0.548281	2.77451	0.320163	320.368	1.39078	457.489	0.883841	569.756	0.528714	194.48	2.04456	2.51848	178.839	1.21954	8.78337	241.31	0.379868	0.352665	103.104	0.834383	0.686383	0.850471	0.701332	0.348813	45.6493	1.51291	0.791659	0.772559	0.755502	91.3095	88.1811	5.4704	103.85	576.098	2.30926	0.903527	0.665433	133.689	0.928467	0.677783	109.51	128.016	103.643	0.809607	0.821354
CADLAD_682	0	1111.62	0.0726049	0.583559	0.0549677	0.0931761	0.0143574	608.177	0.946585	580.721	0.885963	536.768	0.502346	208.853	2.21715	2.08889	265.216	1.07543	10.5479	130.953	0.207308	0.198451	106.414	0.753134	0.560346	0.765849	0.352789	0.0195054	35.7457	1.26048	0.453713	0.299723	0.702794	63.8607	55.5962	6.64538	111.902	535.385	3.05651	0.587896	0.249777	121.522	0.793401	0.735766	153.063	170.244	142.58	0.837501	0.826605
CADLAD_683	0	844.139	0.0675486	0.543691	0.100711	0.250612	0.0430327	265.813	1.05243	450.753	0.980654	567.064	0.648718	177.389	1.93737	1.41307	278.455	0.933279	8.96101	163.816	0.250458	0.224515	101.035	0.712581	0.515648	0.729721	0.30152	0.0575516	35.3417	0.285768	0.28686	0.0547803	0.391128	50.8652	38.4326	6.25055	109.325	480.904	2.78382	0.534394	0.275188	160.63	0.906293	0.865968	180.922	198.587	170.328	0.857701	0.848258
CADLAD_684	0	612.527	0.062123	0.654617	0.0532758	0.123131	0.0397833	341.373	1.27237	542.29	0.874867	435.758	0.501702	89.5663	0.0492237	0.156046	105.186	0.0690506	1.68155	125.922	0.30571	0.288731	115.799	0.478975	0.216022	0.464375	0.349344	0.0336048	33.2779	0.709339	0.330943	0.133152	0.521961	41.334	35.8739	7.89674	90.6127	590.934	2.09404	0.697599	0.292199	80.5537	0.865765	0.295139	68.0558	86.4497	66.1184	0.764819	0.753576
CADLAD_685	0	1004.73	0.100097	0.705821	0.12038	0.21701	0.0457663	715.845	1.27536	561.406	0.960939	575.021	0.577386	180.193	1.86924	2.44149	270.48	1.41249	9.92844	205.212	0.319125	0.329784	100.5	0.612148	0.359042	0.589238	0.391224	0.0571223	34.9909	1.21779	0.550701	0.38384	0.573745	91.4841	83.6004	2.77382	181.908	490.267	1.75019	0.895478	0.732559	181.609	0.828104	0.658975	202.597	213.115	192.722	0.904311	0.873162
CADLAD_686	0	1144.41	0.0637175	0.615652	0.184364	0.278543	0.0490506	647.049	1.73815	488.657	0.957072	494.228	0.659298	184.333	2.46113	0.78258	233.384	0.497383	9.90389	102.135	0.194497	0.188126	112.838	0.554979	0.279392	0.49509	0.546753	0.115645	27.5478	0.66768	0.648238	0.262418	0.741882	54.6169	48.7811	6.11716	95.4652	600.657	1.75679	0.952968	0.61019	155.005	0.877787	0.406296	161.879	165.561	152.472	0.920937	0.933525
CADLAD_687	0	965.811	0.0967293	0.709827	0.14567	0.958916	0.0948737	480.996	2.59393	528.99	0.924182	377.027	0.795159	98.7234	2.62295	2.71717	170.954	1.58476	8.81824	162.105	0.361152	0.345459	106.119	0.689788	0.422844	0.591616	0.44479	0.0999557	36.202	1.05834	0.6445	0.392178	0.806976	52.8079	48.0507	8.40506	64.8227	540.537	2.4502	0.869784	0.524152	106.139	0.86181	0.742175	101.453	111.077	92.7164	0.834701	0.878424
CADLAD_688	0	1090.03	0.0857631	0.303853	0.046734	0.0756541	0.020821	385.038	1.67989	468.045	0.95065	523.164	0.371689	98.993	0.280999	0.644495	109.755	0.370022	16.6008	188.144	0.314304	0.314356	115.318	0.691154	0.525454	0.767276	0.398581	0.186859	41.1574	1.11765	0.69284	0.372719	0.502418	53.9585	42.122	7.21242	90.6966	516.046	2.34789	0.670122	0.549208	94.2617	0.61014	0.437331	70.4579	103.085	62.9361	0.610527	0.592713
CADLAD_689	0	900.561	0.124749	0.658444	0.0666088	0.100378	0.0402364	326.279	1.32267	483.066	0.956271	568.568	0.668829	208.952	2.09	2.2391	234.396	1.06608	7.05117	312.853	0.544797	0.561527	98.1992	0.709908	0.508533	0.727539	0.526268	0.0620204	59.9628	1.0513	0.709091	0.455622	0.87606	147.621	138.349	2.67719	195.601	510.25	1.31826	0.953322	0.910292	242.445	0.915996	0.780249	238.559	249.436	233.282	0.935239	0.890363
CADLAD_690	1	1113.67	0.066844	0.594988	0.0939415	0.164529	0.0231465	365.573	1.76737	437.86	0.87858	473.086	0.619687	93.5396	0.544229	1.58811	120.059	0.756364	23.0289	106.109	0.20228	0.18984	98.1542	0.90148	0.832229	0.926192	0.538823	0.147905	24.5927	0.393393	0.434671	0.0832842	0.74917	39.6898	33.6231	9.27168	59.0825	527.342	3.00223	0.824469	0.504645	74.2244	0.785356	0.339522	75.1352	84.9572	65.2485	0.768017	0.739679
CADLAD_691	0	949.979	0.0597269	0.55094	0.0475562	0.0673595	0.0248164	560.391	1.69341	558.997	0.951616	454.994	0.543961	127.655	1.53795	1.84344	159.828	1.25132	10.6717	79.9041	0.161819	0.148723	106.823	0.778387	0.641533	0.831566	0.321639	0.0770079	25.6303	1.76313	0.532044	0.349939	0.438091	48.7922	32.8979	8.50535	92.2382	582.438	3.61103	0.567849	0.29218	83.2675	0.742578	0.504635	59.2683	76.0798	53.3168	0.700801	0.713652
CADLAD_692	0	801.086	0.0807786	0.704924	0.036757	0.0668584	0.0215732	266.77	1.06041	430.338	0.990043	502.796	0.744597	111.639	1.42571	1.66293	142.574	1.2597	10.4835	202.637	0.323105	0.309842	109.241	0.433978	0.220208	0.489667	0.423569	0.0742062	42.0649	1.12673	0.49991	0.350188	0.620971	65.3684	53.4562	4.18706	137.621	522.184	1.70832	0.858031	0.768489	135.016	0.717937	0.548274	107.371	152.027	97.3667	0.640456	0.598251
CADLAD_693	0	796.278	0.102745	0.721678	0.0747643	0.103003	0.0456815	385.306	1.05794	489.813	0.984122	549.107	0.671874	180.948	3.01652	2.80474	327.608	1.75372	7.81681	234.188	0.371517	0.32656	87.0003	0.924232	0.90589	0.94941	0.334426	0.108029	37.4237	1.358	0.583168	0.478236	0.692811	71.2698	61.1903	4.33471	135.822	510.76	1.96072	0.783406	0.52496	150.785	0.772075	0.497113	190.178	208.601	184.453	0.884238	0.883002
CADLAD_694	1	759.3	0.124268	0.681291	0.0689988	0.112147	0.037022	297.054	1.11651	462.232	0.968426	534.581	0.503508	225.009	1.48087	1.55161	211.039	0.925827	6.8561	177.397	0.289476	0.255019	90.3823	0.767086	0.570159	0.744002	0.552531	0.066042	47.0839	1.57771	0.754527	0.502151	0.75095	74.8958	66.3674	3.35814	160.91	528.472	1.44469	0.950954	0.686893	211.354	0.86896	0.554773	194.042	203.715	185.829	0.912198	0.922978
CADLAD_695	0	1004.42	0.148692	0.78462	0.112004	0.180909	0.0877794	797.429	4.86629	593.377	0.957796	256.689	0.815846	101.905	2.54016	2.21083	109.063	1.38637	4.81687	109.434	0.591547	0.709869	85.4722	0.91007	0.864081	0.926669	0.464122	0.232582	34.0556	0.804123	0.605382	0.300258	0.916445	75.6569	75.53	6.8403	97.0067	642.263	1.2982	0.902437	0.798951	98.6179	0.815987	0.671173	101.161	103.727	97.4541	0.939525	0.834667
CADLAD_696	0	982.759	0.0729668	0.53968	0.140138	0.246456	0.0422975	792.197	3.11261	596.512	0.826622	448.613	0.703174	80.8781	0.109694	2.62385	68.5069	1.38266	0.828448	110.997	0.273007	0.277312	85.7275	0.947951	0.916897	0.976877	0.491167	0.0947005	25.7315	1.37117	0.703827	0.505071	0.628576	67.3999	58.4592	5.85015	111.667	657.168	0.62791	0.895395	0.669419	87.8175	0.742418	0.481646	55.6829	61.1731	49.3741	0.807122	0.774956
CADHealth_110	NA	1031.07	0.0235262	0.325405	0.0325807	0.0882929	0.00930332	459.026	1.09711	411.907	0.938812	644.246	0.268299	198.273	1.68443	0.782242	250.397	0.46619	14.0982	189.465	0.337277	0.329718	117.456	0.440518	0.167555	0.369352	0.318552	0.168684	30.5676	0.505222	0.544357	0.380379	0.360441	48.5982	34.2423	6.5981	106.476	606.043	3.11609	0.645966	0.576092	115.901	0.465338	0.343803	80.6377	124.379	64.6937	0.520133	0.456539
CADHealth_208	NA	1468.33	0.0691573	0.606382	0.133472	0.322297	0.0355847	807.708	1.02578	462.677	0.752995	595.889	0.477721	76.5305	1.64412	1.265	104.323	0.862375	21.6645	91.7866	0.142356	0.174437	117.16	0.471907	0.213674	0.445983	0.346898	0.0827248	38.9473	0.963441	0.431338	0.29325	0.362603	47.3757	30.2961	7.71468	90.5225	556.44	3.23704	0.594617	0.2	117.825	0.616405	0.487819	77.707	120.275	61.8666	0.514377	0.501571
CADHealth_298	NA	926.403	0.0468726	0.506009	0.0614079	0.173617	0.0137298	301.424	0.958757	421.16	0.876795	458.845	0.446284	160.007	1.74466	2.04496	259.741	1.01513	7.28306	295.746	0.482519	0.498923	106.688	0.700362	0.49656	0.724037	0.322179	0.023785	33.0372	0.465386	0.372717	0.109529	0.588071	49.883	35.9789	7.49545	96.856	568.874	3.15878	0.650015	0.176249	103.089	0.46779	0.19621	95.2776	129.576	78.084	0.602612	0.640647
CADHealth_361	NA	1158.48	0.0679803	0.544455	0.0286954	0.0526218	0.00914947	666.855	0.92572	567.672	0.961614	574.845	0.636399	132.181	2.05901	3.00392	249.987	1.74519	9.05466	140.472	0.236865	0.212855	115.303	0.658841	0.4205	0.624086	0.31218	0.0908138	38.8696	0.586155	0.467753	0.196197	0.421526	50.3529	34.4435	7.60254	94.5056	524.196	3.41578	0.527222	0.103389	94.359	0.441233	0.239292	83.9601	107.367	68.8792	0.641528	0.57574
CADHealth_454	NA	954.416	0.064942	0.424593	0.104845	0.190457	0.0357941	303.708	0.973361	447.339	0.968948	589.859	0.321727	131.364	2.45472	2.10839	279.922	1.40263	9.40688	129.244	0.197034	0.182571	117.933	0.562742	0.33176	0.591141	0.369949	0.0519767	26.271	0.259513	0.295254	0.0502776	0.394045	66.5269	46.8935	8.08253	96.4873	515.709	5.15643	0.37563	0.164711	115.992	0.462382	0.275214	78.5593	123.39	57.0999	0.46276	0.442147
CADHealth_517	NA	1077.06	0.0289072	0.668617	0.0462036	0.0982134	0.0118364	760.8	1.85989	652.259	0.941922	619.727	0.215246	120.58	1.1766	1.36302	85.6708	1.05087	11.5691	224.676	0.360045	0.360882	114.323	0.443615	0.245312	0.550993	0.248153	0.0325147	29.9766	0.491562	0.618384	0.312807	0.401029	53.3009	31.9862	11.4022	90.9312	635.363	4.19787	0.344555	0.124285	105.627	0.329486	0.161541	81.1135	127.492	47.6848	0.37402	0.447126
CADHealth_554	NA	878.777	0.0637939	0.515125	0.0252806	0.0660859	0.0110713	339.064	1.22604	446.807	0.98498	570.384	0.616993	170.481	1.38938	1.15492	210.191	0.773705	8.61234	106.845	0.166203	0.162353	105.507	0.594929	0.29874	0.518614	0.24445	0.0381193	33.0711	0.564407	0.312524	0.103262	0.644015	101.027	91.6612	4.19905	150.802	603.139	2.56904	0.881221	0.415556	151.036	0.75371	0.521848	149.781	163.804	137.723	0.840775	0.792913
CADHealth_565	NA	563.437	0.102481	0.552977	0.044386	0.090382	0.0167394	288.706	1.17334	524.479	0.9	625.405	0.629779	79.9258	1.0399	1.26353	246.464	0.670369	12.34	166.634	0.250183	0.231854	119.652	0.61857	0.35409	0.56498	0.520682	0.12153	22.7979	1.41865	0.712884	0.503015	0.655865	41.8391	34.1228	9.82148	60.2458	559.962	3.51634	0.789123	0.425184	75.7779	0.797373	0.332826	75.3232	90.7025	64.4448	0.710507	0.712492
CADHealth_1	NA	1266.63	0.0314494	0.483211	0.0328553	0.0520131	0.012115	292.535	0.950733	421.816	0.974387	555.772	0.352893	132.115	2.25515	1.88016	189.905	1.34094	9.51669	158.101	0.278041	0.277647	116.813	0.422289	0.16331	0.397027	0.2812	0.0181148	28.3358	0.233361	0.243551	0.0354841	0.336325	47.1227	26.8001	7.93111	97.5609	548.42	7.00999	0.343451	0.0606558	113.035	0.387716	0.20571	83.2761	131.692	53.563	0.40673	0.37005
CADHealth_12	NA	1059.65	0.0640053	0.511989	0.111844	0.224612	0.0678544	665.682	0.91694	420.101	0.963478	704.146	0.31873	147.386	2.39523	0.840155	94.5219	0.463438	13.3388	138.931	0.244267	0.22778	116.528	0.391102	0.198699	0.498048	0.658131	0.134255	22.1111	0.413925	0.570162	0.220379	0.641254	35.1447	22.2746	8.68848	57.7078	420.351	2.98904	0.658154	0.241676	79.8809	0.706574	0.508109	61.5166	72.2199	54.4806	0.754371	0.710245
CADHealth_24	NA	1279.57	0.0342292	0.345954	0.0117612	0.0178884	0.00439387	795.814	1.05318	467.588	0.976782	587.606	0.50046	139.878	0.976799	2.25195	247.727	1.34136	9.71064	260.461	0.406939	0.387175	124.669	0.457498	0.204583	0.439845	0.276049	0.037919	29.2144	0.329494	0.456935	0.225277	0.595294	52.3953	35.3793	7.80619	94.1522	538.454	3.58502	0.59993	0.382428	117.587	0.469498	0.166859	89.3255	133.716	66.8905	0.500244	0.516999
CADHealth_35	NA	913.923	0.0369879	0.48614	0.0825311	0.131641	0.029766	327.084	1.06765	451.906	0.943114	568.446	0.570829	163.52	2.40534	2.60324	230.624	1.29798	13.3482	194.99	0.306049	0.307624	117.133	0.688083	0.494359	0.724271	0.475938	0.155494	23.9364	1.75714	0.700222	0.379695	0.516589	44.752	37.2266	9.00321	72.5795	518.89	3.40973	0.667301	0.549121	104.028	0.702329	0.371984	94.4992	108.436	86.4295	0.797053	0.797354
CADHealth_48	NA	1175.55	0.0342691	0.5581	0.0326126	0.0896141	0.012774	327.093	0.983038	406.142	0.988996	552.59	0.346304	215.479	2.29598	2.76676	377.736	1.8574	10.235	269.865	0.412972	0.369823	110.76	0.472823	0.197645	0.427818	0.257627	0.0772651	33.2752	0.915175	0.390043	0.223462	0.390359	68.9328	48.3233	7.67652	96.4372	534.515	4.5016	0.416642	0.125318	118.643	0.367879	0.108937	117.61	148.776	113.784	0.764803	0.771067
CADHealth_59	NA	803.479	0.0655588	0.565328	0.197672	0.348887	0.0503279	581.215	1.11316	458.624	0.959546	533.584	0.337103	126.435	1.86774	1.75439	189.514	0.577296	12.2863	174.674	0.314623	0.296031	115.257	0.517681	0.256027	0.486632	0.294484	0.110842	30.4109	0.685988	0.381063	0.213674	0.473998	42.3673	27.2708	6.97709	90.5042	541.377	3.25376	0.695288	0.426392	108.19	0.535632	0.275125	83.8413	120.796	68.2224	0.564773	0.51878
CADHealth_72	NA	546.333	0.0693511	0.388305	0.0244436	0.0467347	0.015287	439.026	1.05899	561.7	0.953284	553.515	0.215228	278.444	0.964653	2.40487	393.628	1.60639	5.43294	245.207	0.40799	0.362177	120.273	0.476641	0.246415	0.51434	0.34635	0.0333144	28.1035	1.19316	0.498906	0.304219	0.47994	55.3816	45.5473	7.58816	92.5648	573.244	3.7205	0.597284	0.348551	106.791	0.516902	0.260995	110.023	127.705	91.8386	0.719144	0.700787
CADHealth_81	NA	1068.06	0.0554831	0.370325	0.0572088	0.0947011	0.0129993	254.892	1.16445	516.346	0.981861	467.356	0.505742	153.179	1.81743	2.27007	178.577	1.15865	10.4703	120.02	0.205483	0.211829	116.843	0.626302	0.370273	0.59642	0.435473	0.113418	26.711	1.26303	0.521391	0.318578	0.591069	40.7365	32.3132	11.4894	56.5912	543.361	4.40944	0.596439	0.267112	72.1142	0.604994	0.266684	70.0261	81.0608	56.2845	0.69435	0.731729
CADHealth_92	NA	1070.73	0.0468217	0.386245	0.124122	0.186829	0.0438119	488.587	0.902833	508.436	0.969969	643.104	0.381125	199.742	1.97261	2.48698	234.583	1.66134	7.75397	183.943	0.300665	0.252988	110.81	0.545506	0.275445	0.49872	0.328457	0.12863	31.632	0.47742	0.429227	0.181111	0.483458	54.9354	38.0166	7.21932	94.9116	490.267	3.54797	0.516593	0.278713	116.837	0.579068	0.337311	105.632	140.319	93.663	0.6675	0.671003
CADHealth_93	NA	1007.54	0.058027	0.48479	0.120396	0.184545	0.043469	463.955	0.910453	525.887	0.948374	642.978	0.434477	222.133	2.00799	2.62225	247.831	1.4866	6.8905	204.126	0.332005	0.290297	105.855	0.699152	0.45252	0.683538	0.333425	0.166567	31.3037	0.479632	0.4476	0.251235	0.554194	65.2847	52.0109	6.71589	103.506	489.844	3.01626	0.562781	0.318134	140.132	0.756078	0.543849	177.483	201.554	170.781	0.847319	0.805107
CADHealth_101	NA	1449.4	0.0727389	0.391616	0.112971	0.181085	0.0316683	298.502	0.937955	446.419	0.948478	662.207	0.272638	113.294	2.88422	0.844954	173.969	0.526609	19.9727	203.651	0.294274	0.266083	111.38	0.541058	0.268512	0.510379	0.717766	0.38339	31.6668	1.05179	0.684544	0.399577	0.694046	43.0677	32.6169	8.44703	62.7845	541.832	3.08139	0.746982	0.50097	71.0131	0.700296	0.46837	70.6322	81.1908	59.0361	0.727128	0.718982
CADHealth_111	NA	975.443	0.0930531	0.604177	0.0730871	0.102266	0.0372874	264.555	1.13138	428.816	0.931456	607.519	0.497906	147.546	2.37331	2.51352	277.914	1.62276	11.4475	163.342	0.246586	0.224763	108.393	0.688216	0.472452	0.688604	0.346101	0.0767326	52.2331	1.17019	0.716603	0.518374	0.636826	88.4821	71.7633	5.57251	108.285	543.239	2.51676	0.726361	0.375951	137.019	0.740148	0.567583	158.48	179.041	140.729	0.786017	0.810517
CADHealth_122	NA	745.96	0.0617599	0.636314	0.160609	0.502546	0.10763	279.156	1.18525	433.559	0.840164	446.973	0.652671	107.94	4.20415	4.05205	144.006	3.0586	7.92237	96.2496	0.168201	0.159291	114.537	0.493208	0.215137	0.42406	0.301969	0.05029	27.9491	0.515318	0.3748	0.0877436	0.424068	48.9995	36.2351	7.52967	99.5186	507.772	3.65284	0.576043	0.353566	105.745	0.48336	0.310918	69.3732	97.6814	62.6207	0.641071	0.629733
CADHealth_130	NA	1234.75	0.0258387	0.351641	0.0747139	0.130541	0.010218	630.307	0.993193	420.359	0.956469	571.825	0.488801	109.024	1.75293	1.04523	192.802	0.768206	11.5175	133.787	0.221662	0.222415	120.378	0.347164	0.106376	0.29806	0.25601	0.0805912	33.6133	0.238648	0.338347	0.0565136	0.50925	48.6037	28.2728	5.26698	102.595	469.127	2.83382	0.633333	0.480507	115.941	0.505575	0.369465	86.3659	138.503	61.2971	0.44257	0.386866
CADHealth_137	NA	1169.91	0.0572522	0.626731	0.0200812	0.0371419	0.00808339	346.305	1.03132	424.162	0.955415	531.114	0.540158	188.778	2.95168	1.57585	236.498	0.97557	11.0999	206.107	0.308276	0.288326	116.06	0.662415	0.446588	0.672923	0.582006	0.140976	25.1963	0.942342	0.461578	0.187425	0.776606	51.0372	40.2487	8.24794	66.5207	529.234	3.61059	0.793083	0.387003	75.1717	0.759025	0.431932	94.0391	102.199	82.9349	0.811502	0.793238
CADHealth_146	NA	727.509	0.031789	0.500105	0.193407	0.310415	0.0803937	406.864	0.962536	444.299	0.929626	536.637	0.448341	179.492	0.904824	1.1717	277.354	0.448962	9.77575	180.522	0.309404	0.350575	117.023	0.512474	0.382373	0.63094	0.394065	0.212805	31.477	0.42671	0.364852	0.149045	0.661986	52.2312	38.4875	7.92012	97.7474	550.952	5.10397	0.422239	0.104307	114.062	0.386099	0.120229	88.1767	130.691	81.9563	0.627101	0.639601
CADHealth_155	NA	1344.64	0.0421521	0.584022	0.109364	0.148851	0.0625198	306.951	1.01321	551.007	0.92119	574.176	0.597501	140.636	2.16966	2.88316	221.864	1.41358	9.06469	238.805	0.416958	0.403286	118.964	0.478248	0.211426	0.437574	0.47006	0.125659	28.1995	0.573179	0.539103	0.127466	0.657756	44.0082	33.7809	9.25669	63.7585	480.017	3.86827	0.599978	0.183787	71.225	0.753859	0.428431	78.788	113.538	68.6582	0.604717	0.598737
CADHealth_165	NA	796.197	0.122385	0.555863	0.163344	0.264855	0.0790911	319.698	1.85687	503.518	0.792038	511.183	0.483953	130.22	1.11399	2.62887	283.572	1.41471	14.059	106.021	0.180764	0.159295	115.053	0.711215	0.458787	0.668103	0.323408	0.141133	38.653	1.74502	0.746624	0.693272	0.528512	45.5234	19.7505	11.8409	93.025	702.749	6.90416	0.303077	0.150067	106.17	0.322156	0.18912	78.0011	105.24	60.1164	0.571233	0.544188
CADHealth_187	NA	1104.27	0.0620519	0.529896	0.0572199	0.0886366	0.0147838	282.916	1.5763	418.554	0.894136	502.362	0.475726	155.038	1.79917	1.57524	228.352	1.12492	12.7223	293.522	0.500563	0.421725	115.081	0.449992	0.163886	0.367868	0.294592	0.0463006	33.5855	1.08492	0.487176	0.381636	0.544989	58.0759	42.0267	10.5355	81.0115	563.12	3.74269	0.455289	0.204068	120.542	0.639119	0.577377	73.0598	128.162	52.36	0.408545	0.35477
CADHealth_198	NA	945.637	0.0628855	0.58884	0.0795675	0.169797	0.0240275	290.423	1.03472	432.22	0.918229	575.437	0.421102	193.415	2.64362	2.3468	220.98	1.65017	8.01163	221.957	0.358318	0.356295	91.6303	0.877276	0.796117	0.909321	0.463034	0.0545487	23.8546	0.755564	0.485351	0.143513	0.55089	39.1369	29.8981	7.44313	79.6975	520.032	2.96016	0.676167	0.257758	123.751	0.846514	0.631774	176.8	180.339	175.667	0.974094	0.907401
CADHealth_209	NA	599.215	0.0581113	0.411947	0.0662324	0.105195	0.0166552	585.572	1.16602	491.48	0.939049	540.376	0.573175	117.189	2.5345	0.504351	56.8811	0.300105	21.4638	107.199	0.17989	0.182513	121.453	0.476892	0.186892	0.392079	0.226988	0.100467	30.9744	0.44213	0.419496	0.150659	0.39571	66.5943	49.5783	8.54221	88.7277	534.558	4.54166	0.45865	0.276154	89.7815	0.421751	0.149905	61.4463	100.87	44.0538	0.436736	0.372205
CADHealth_220	NA	1200.59	0.0365423	0.428655	0.0959352	0.140116	0.0276291	820.036	1.60088	557.903	0.883399	731.465	0.394201	176.753	0.077009	1.41712	65.8533	0.942099	30.1233	59.6237	0.120539	0.0510801	121.202	0.515844	0.383591	0.635749	0.54905	0.167783	26.5881	0.24538	0.586692	0.18899	0.642418	43.8807	35.919	11.4065	69.4213	586.435	5.1848	0.539531	0.306252	61.1883	0.515103	0.236606	40.0114	58.7274	27.978	0.476405	0.461627
CADHealth_229	NA	1221.32	0.0828406	0.595534	0.0134953	0.0401733	0.00585693	388.846	1.0538	537.918	0.917369	525.609	0.550141	138.417	2.3374	2.37548	252.02	1.28754	12.8435	234.859	0.357663	0.343033	111.517	0.557876	0.284694	0.522789	0.309873	0.14699	32.4684	0.750206	0.48799	0.125713	0.359009	47.2648	32.5662	7.87703	99.7636	512.162	3.71373	0.438855	0.251591	113.937	0.528436	0.284437	110.871	136.778	96.8665	0.708202	0.620932
CADHealth_238	NA	1288.27	0.055153	0.516034	0.0167243	0.0251654	0.0100058	260.301	0.979626	421.313	0.935317	517.382	0.435768	118.129	2.63858	2.1537	305.81	1.6433	11.6911	143.959	0.21201	0.189241	120.877	0.525644	0.262652	0.49926	0.323238	0.08523	30.5556	0.137714	0.23224	0.0184741	0.424255	67.8831	46.2797	6.59597	98.4672	475.003	3.45807	0.536562	0.341811	109.442	0.39099	0.254994	84.1813	131.81	63.2803	0.480086	0.464694
CADHealth_249	NA	1246.22	0.0599019	0.538618	0.0770713	0.105557	0.0249371	390.28	1.04009	468.486	0.983608	527.39	0.360379	152.879	1.67583	2.88048	216.184	1.23739	17.4893	97.9757	0.152428	0.166502	101.346	0.837266	0.706399	0.849305	0.454834	0.157323	37.1752	0.763475	0.4999	0.255269	0.549284	45.6973	35.4771	6.16118	95.5294	560.267	2.44979	0.788417	0.692291	107.71	0.759057	0.521611	117.288	132.049	106.158	0.803924	0.751935
CADHealth_267	NA	1112.74	0.0394225	0.679196	0.140248	0.305672	0.0364112	393.959	1.0208	560.195	0.890983	410.591	0.442766	176.329	2.40786	1.87479	226.717	0.80008	10.1906	110.879	0.175968	0.182449	115.682	0.486178	0.234267	0.464476	0.260957	0.138446	32.4973	0.513151	0.23142	0.0797054	0.602126	54.5013	40.5601	7.35107	106.397	514.642	3.98788	0.434106	0.141018	116.448	0.594018	0.385235	103.364	144.039	80.4369	0.558438	0.552446
CADHealth_275	NA	1071.33	0.0723464	0.603418	0.248674	0.935793	0.0614804	653.176	0.993994	638.316	0.971958	624.834	0.122458	108.021	1.28746	0.806677	188.697	0.529633	15.1878	152.587	0.228097	0.226297	90.1551	0.937183	0.888744	0.94782	0.357496	0.203602	29.4637	0.355282	0.362118	0.0646463	0.429071	69.4131	55.18	5.41881	118.637	465.516	3.02621	0.600488	0.444296	111.026	0.612329	0.403182	81.3935	124.138	60.3248	0.485951	0.472205
CADHealth_282	NA	1115.44	0.0384886	0.341957	0.102057	0.15515	0.0211568	840.234	0.952481	534.053	0.954539	570.579	0.411596	131.669	0.565914	0.866602	196.219	0.292205	18.3288	135.893	0.224586	0.20341	107.022	0.47102	0.21742	0.485524	0.558992	0.0594779	23.2184	0.787334	0.733449	0.344785	0.605929	46.2145	37.5458	8.86586	78.8074	496.548	2.81977	0.580917	0.237048	125.39	0.850031	0.240722	89.6918	113.589	84.4651	0.743602	0.727531
CADHealth_292	NA	1931.82	0.0760173	0.545169	0.0720564	0.122077	0.0252463	335.362	1.04075	517.534	0.809722	530.623	0.264863	168.388	2.52802	2.10205	200.195	0.91579	10.8742	167.311	0.266148	0.214628	124.897	0.348649	0.104009	0.276004	0.37355	0.127772	30.8684	0.749904	0.450784	0.148203	0.48754	42.0125	36.1203	7.67264	88.065	526.278	2.32071	0.652609	0.465649	80.6047	0.677803	0.442117	70.2528	97.9456	61.4296	0.62718	0.637522
CADHealth_299	NA	1204.08	0.0576791	0.622825	0.0740691	0.134658	0.0183364	346.922	1.35804	420.519	0.90707	644.506	0.179008	170.537	2.81197	1.72211	196.853	1.21422	19.1386	92.9008	0.14555	0.13849	114.275	0.408459	0.143334	0.345274	0.321984	0.0327254	30.027	0.60488	0.416699	0.0880829	0.343621	47.5843	30.6911	7.95185	76.4764	406	2.28671	0.510792	0.363791	93.103	0.703594	0.129138	71.0199	110.98	51.3877	0.463036	0.380278
CADHealth_300	NA	1449.61	0.0601265	0.485985	0.0991875	0.199022	0.0256949	278.187	0.953708	425.344	0.931539	467.343	0.422385	92.7335	2.24969	1.00274	86.801	0.690448	7.81404	118.379	0.194039	0.200076	116.828	0.46914	0.234513	0.494493	0.324792	0.018329	31.124	0.494422	0.248949	0.0748411	0.307654	48.641	30.2065	8.06004	99.9552	537.639	5.69047	0.31963	0.0901791	122.368	0.335234	0.14762	85.4584	125.013	66.8554	0.534786	0.497849
CADHealth_301	NA	1151.42	0.0535059	0.477358	0.0924657	0.164204	0.0197875	466.666	0.958435	425.596	0.982376	598.675	0.363402	103.737	1.23788	1.16836	99.0691	0.525037	9.62639	148.82	0.242367	0.240774	116.594	0.368646	0.0859438	0.228714	0.315742	0.0352764	35.2038	0.279014	0.503816	0.240132	0.389997	45.2334	30.8868	7.23357	92.124	484.386	4.35926	0.496555	0.25712	119.877	0.484236	0.450658	80.5545	128.806	52.8634	0.41041	0.354518
CADHealth_302	NA	1125.36	0.0503849	0.463898	0.194307	0.277554	0.0533917	463.589	1.03852	447.875	0.884147	592.024	0.479971	183.621	1.07787	2.01045	167.308	0.613846	12.0221	103.116	0.157731	0.159436	110.953	0.575585	0.304956	0.533516	0.290566	0.14441	31.5013	0.281335	0.426353	0.123999	0.616297	47.3603	25.504	8.14795	96.8656	564.412	3.68849	0.44327	0.109287	104.338	0.464286	0.200227	77.613	127.669	60.3052	0.472355	0.444718
CADHealth_303	NA	1098.35	0.0475303	0.575334	0.0304856	0.0603872	0.00689248	289.634	1.36437	541.42	0.928354	560.323	0.337506	111.36	1.99728	2.51163	195.884	0.906006	11.7987	88.055	0.147923	0.151524	112.615	0.594234	0.345296	0.581286	0.272533	0.0909962	30.9321	0.289909	0.285125	0.0488547	0.352169	51.0092	39.1904	9.03153	90.2388	588.495	3.59343	0.481053	0.297082	116.121	0.543121	0.187145	93.8053	133.522	72.106	0.540032	0.534192
CADHealth_313	NA	1032.87	0.095231	0.62726	0.0427464	0.0731967	0.0208267	379.402	0.963764	485.553	0.955026	611.109	0.704991	174.589	1.72553	1.96879	198.431	1.09345	7.18181	251.323	0.418439	0.443999	93.075	0.888457	0.760696	0.892517	0.634013	0.16559	31.1011	1.35753	0.856692	0.645402	0.952538	67.1971	61.1327	5.29852	92.9745	494.401	1.8526	0.961907	0.811559	165.604	0.954053	0.830336	213.426	221.304	208.233	0.940936	0.955714
CADHealth_323	NA	1096.54	0.0490115	0.570519	0.0290116	0.0504968	0.00923069	694.377	1.08428	453.695	0.918205	523.004	0.506309	98.0777	1.60672	1.9091	259.173	1.33183	9.08059	210.848	0.348937	0.353161	116.565	0.564382	0.318249	0.561253	0.255562	0.0976691	37.7049	0.760621	0.329858	0.160943	0.535246	44.6314	25.6546	7.79947	90.9305	590.331	3.40778	0.528546	0.181275	104.031	0.480525	0.213582	81.6748	131.081	62.2231	0.474693	0.448105
CADHealth_335	NA	641.876	0.0857419	0.628067	0.0636301	0.095658	0.0389951	286.826	1.00554	425.263	0.988421	552.264	0.392428	157.342	2.2473	1.92186	279.739	1.56045	7.92231	279.865	0.501293	0.479419	114.346	0.469296	0.200454	0.426519	0.271395	0.0203526	32.4914	1.49632	0.511644	0.338501	0.50624	53.4452	42.8159	6.84679	91.7771	502.279	3.27139	0.659936	0.384207	124.45	0.712316	0.609775	147.506	164.288	141.842	0.863376	0.815019
CADHealth_346	NA	1026.09	0.0497312	0.770384	0.178314	0.434531	0.0180587	274.141	1.54514	626.922	0.950198	547.26	0.425029	130.783	1.62074	2.14703	193.673	0.979758	6.88632	96.9052	0.157878	0.155778	106.981	0.7103	0.493005	0.707235	0.163312	0.0393075	32.3339	1.24994	0.370229	0.243821	0.399106	45.8654	25.4414	6.39079	116.549	598.348	3.82279	0.506929	0.228368	96.0152	0.40114	0.200052	76.9923	115.596	49.9792	0.43236	0.482233
CADHealth_352	NA	1580.58	0.226986	0.56467	0.234793	0.518177	0.13994	691.546	1.14094	453.757	0.951146	516.904	0.754716	84.0076	0.830431	1.53769	96.524	0.397985	19.1189	119.926	0.200691	0.217516	119.2	0.478149	0.205777	0.429157	0.534561	0.194984	24.8687	0.186945	0.479359	0.186588	0.515521	52.7028	48.5338	9.90991	56.5728	565.906	4.54189	0.758141	0.305389	63.2188	0.456742	0.148383	60.0561	77.5509	41.5649	0.535969	0.467317
CADHealth_362	NA	1024.57	0.0795335	0.643147	0.0142624	0.0232859	0.0080293	417.339	0.97618	480.113	0.980784	530.501	0.548301	202.512	2.47297	2.01982	290.529	1.67024	10.105	248.869	0.420096	0.409637	103.949	0.74563	0.567644	0.75772	0.286298	0.170392	31.9345	0.426551	0.353387	0.137905	0.419008	49.8798	38.2966	5.35515	114.202	497.2	2.54216	0.713474	0.512882	161.133	0.709609	0.377449	177.302	195.855	163.378	0.834175	0.806851
CADHealth_372	NA	937.201	0.0477139	0.514399	0.078973	0.142511	0.0502206	572.787	2.15758	590.997	0.932941	442.297	0.440729	90.9164	0.231131	0.454532	130.909	0.207432	24.1335	85.3477	0.167256	0.169165	117.652	0.413765	0.149167	0.317092	0.265235	0.237522	29.8883	1.16791	0.640977	0.361656	0.625471	33.4943	20.9913	12.9893	66.7495	632.714	2.61014	0.463352	0.094967	72.2182	0.496022	0.212305	65.9715	91.9056	50.729	0.551968	0.579699
CADHealth_391	NA	1070.95	0.0253965	0.543768	0.153759	0.406059	0.0292178	336.259	0.891192	495.552	0.916937	619.297	0.226314	66.5117	2.22297	0.994535	147.83	0.636859	8.71261	234.919	0.350415	0.298414	119.335	0.457485	0.190459	0.420474	0.336216	0.0566151	37.1363	0.779634	0.36602	0.205252	0.412021	52.0499	34.8121	7.3373	103.537	523.701	4.90347	0.411337	0.119033	110.994	0.459569	0.225408	72.9039	121.604	47.5813	0.39128	0.403336
CADHealth_403	NA	804.562	0.112019	0.675135	0.20793	0.446999	0.104836	304.851	1.28638	461.884	0.954594	510.194	0.655263	148.371	4.59994	2.85256	165.916	2.17538	9.58808	135.287	0.207081	0.183063	99.0653	0.731149	0.545768	0.771157	0.57143	0.124689	31.0823	0.94186	0.723069	0.250714	0.79317	77.3626	73.5597	4.7974	116.488	582.532	2.38459	0.943016	0.419342	134.201	0.818675	0.652398	162.39	164.491	157.824	0.959469	0.884414
CADHealth_414	NA	650.017	0.0909829	0.638289	0.0863971	0.115488	0.0383173	287.219	0.955109	510.123	0.846943	518.548	0.456481	288.579	1.95938	2.38542	360.742	1.34538	7.47795	273.902	0.489716	0.489754	119.132	0.358294	0.124969	0.343046	0.371565	0.0453364	46.6863	1.22441	0.396447	0.369052	0.567867	56.225	36.8378	7.65113	91.8732	533.784	5.20627	0.410741	0.094656	115.202	0.832845	0.612205	83.1719	108.001	70.0141	0.648273	0.599364
CADHealth_422	NA	1043.04	0.0567848	0.543752	0.0250274	0.0644259	0.0138585	329.852	2.68875	507.239	0.961725	551.565	0.473423	138.345	1.52567	2.155	261.451	1.03551	12.4086	251.128	0.526813	0.496447	101.414	0.758337	0.626205	0.821506	0.350522	0.10748	29.5308	0.832114	0.581726	0.205892	0.439327	40.1912	31.7206	14.2247	65.5874	587.287	2.31007	0.460638	0.0492353	82.4848	0.416117	0.0595058	63.6907	92.1578	43.2318	0.469106	0.478807
CADHealth_434	NA	1121.41	0.0636905	0.629783	0.0163397	0.0222703	0.00880133	313.114	1.10294	419.162	0.92187	522.459	0.398273	130.253	2.28978	2.74982	214.517	1.51216	9.23999	156.896	0.30406	0.266383	114.36	0.441752	0.205177	0.457277	0.322336	0.0310313	29.9906	0.587338	0.391319	0.133183	0.418552	52.2426	35.0367	7.1793	91.0118	456.289	2.97414	0.568488	0.398038	88.0686	0.598879	0.439569	74.9292	89.4296	68.8998	0.770437	0.792724
CADHealth_444	NA	1265.99	0.0699927	0.649364	0.14024	0.227927	0.0709536	374.066	1.58559	439.112	0.953556	546.282	0.654232	172.742	2.37967	2.63147	279.014	0.502815	7.2984	239.982	0.409487	0.405721	119.045	0.442042	0.211989	0.462982	0.331575	0.0816231	41.0743	1.39668	0.641377	0.444336	0.648074	47.9911	45.3128	9.41246	72.9613	500.218	3.04964	0.613932	0.579345	84.5088	0.50818	0.253565	83.9749	93.503	69.0556	0.738539	0.711644
CADHealth_455	NA	1098.47	0.0217179	0.559509	0.0634203	0.119875	0.00754471	465.19	1.11721	412.717	0.948137	539.54	0.334032	126.81	2.23771	1.96077	254.967	1.30645	35.0479	130.661	0.196006	0.163617	113.329	0.659871	0.451146	0.667787	0.347983	0.163354	31.7121	1.32718	0.510507	0.412207	0.460638	42.5785	28.059	8.6778	81.0295	503.22	3.76622	0.467184	0.235412	89.6701	0.432872	0.190759	74.6352	102.019	63.2094	0.619585	0.587573
CADHealth_474	NA	829.551	0.0627991	0.44957	0.0407645	0.0762754	0.0161572	359.64	0.963571	488.588	0.961144	483.911	0.703057	127.965	2.00141	1.24483	167.366	0.653837	8.0162	145.877	0.244266	0.24496	115.504	0.436513	0.186891	0.408398	0.478115	0.136505	31.9044	1.68115	0.656916	0.396664	0.631074	59.3609	54.1745	8.01606	69.5669	535.616	4.27213	0.554351	0.133144	68.3748	0.688853	0.225654	87.0234	116.067	77.5852	0.66845	0.703382
CADHealth_484	NA	1114.98	0.0913021	0.516135	0.150181	0.351683	0.0580856	280.127	1.00813	429.673	0.933728	553.611	0.734118	126.979	2.27761	3.81373	207.483	2.7884	9.46655	197.768	0.294095	0.274263	106.175	0.769604	0.599411	0.781977	0.323374	0.0571092	33.9925	0.246231	0.328633	0.0694916	0.636139	55.3822	37.8442	5.06729	118.771	490.244	2.72945	0.658742	0.364336	137.005	0.637909	0.519742	123.723	156.296	110.133	0.704643	0.665907
CADHealth_491	NA	1047.92	0.0612675	0.702679	0.0734783	0.104534	0.0230845	330.304	1.0726	433.497	0.983839	560.36	0.452757	222.822	3.48353	3.78122	249.834	1.36426	16.7299	176.629	0.269602	0.285263	117.404	0.4509	0.165764	0.359676	0.346169	0.0751935	35.6194	0.536727	0.280995	0.113444	0.469266	55.5684	42.5664	8.13038	89.9293	507.209	4.63167	0.486739	0.202514	99.8578	0.675609	0.455696	110.71	130.307	101.501	0.778934	0.725929
CADHealth_495	NA	1496.97	0.0428232	0.580995	0.0524178	0.0760283	0.0169503	284.925	2.21154	416.1	0.862508	523.267	0.337735	208.169	1.38147	2.14858	325.598	1.08933	11.8696	293.843	0.492266	0.508485	123.593	0.45109	0.242487	0.448718	0.367407	0.14755	30.7365	0.586111	0.345505	0.108989	0.338483	38.6369	24.7168	12.7536	89.351	708.594	3.94147	0.385398	0.223072	112.586	0.493306	0.0665159	69.6396	108.594	59.3457	0.54649	0.517253
CADHealth_498	NA	1060.3	0.0671328	0.564336	0.160965	0.275352	0.0495718	314.35	0.943185	426.734	0.840793	654.726	0.410108	174.75	1.67351	2.53918	306.134	2.04955	10.3984	221.865	0.333923	0.305251	104.482	0.740905	0.555411	0.755531	0.3697	0.228167	35.9527	0.725766	0.386523	0.182893	0.400294	58.9107	44.4846	7.39452	104.318	476.997	3.15618	0.453441	0.15402	149.302	0.79368	0.756658	120.639	145.945	113.16	0.775363	0.736981
CADHealth_504	NA	1145.15	0.0527169	0.530259	0.102792	0.151711	0.0353439	404.203	0.998855	441.558	0.961106	537.307	0.576807	136.43	2.20636	2.76204	142.788	1.49342	13.0837	195.03	0.306187	0.314948	112.356	0.495078	0.237434	0.478611	0.342195	0.149901	39.5561	1.35411	0.583166	0.47285	0.489557	54.7804	40.8379	6.15734	91.5757	500.875	3.73999	0.701726	0.406365	97.4831	0.797556	0.550812	91.1403	119.092	72.494	0.608723	0.593459
CADHealth_507	NA	838.625	0.0402303	0.507875	0.0344239	0.0986214	0.00919776	286.867	0.980705	463.331	0.911066	668.437	0.256946	92.0715	0.252376	0.491855	186.405	0.297699	10.2699	238.345	0.416483	0.461511	115.569	0.527839	0.24301	0.458374	0.318186	0.0186656	32.8696	0.501399	0.497767	0.158414	0.398104	59.3378	47.2637	6.92515	102.459	589.938	4.39184	0.564105	0.0505321	120.015	0.511705	0.106577	85.0472	126.307	64.8479	0.513415	0.475744
CADHealth_512	NA	1047.69	0.0464348	0.334094	0.0259542	0.0523517	0.0082369	702.9	0.923469	433.162	0.913494	639.406	0.243304	164.97	2.13588	1.71152	305.191	0.951163	18.7352	183.52	0.269967	0.225289	108.355	0.628142	0.387718	0.610464	0.287213	0.0637621	32.0488	0.168208	0.42116	0.096574	0.377695	56.8829	43.3622	5.96092	104.437	522.427	2.9226	0.671476	0.313898	124.302	0.600841	0.493603	101.146	134.931	81.2474	0.602141	0.536361
CADHealth_518	NA	1528.87	0.0557039	0.358341	0.0208287	0.0406312	0.0100211	295.651	1.58783	459.789	0.954528	565.185	0.398815	169.427	3.05325	2.8883	358.679	2.01163	16.3175	115.203	0.172678	0.148305	118.151	0.396777	0.144655	0.35665	0.298589	0.00779381	38.6931	0.585086	0.380213	0.100614	0.314345	50.8475	38.1555	8.34334	88.3927	615.873	3.77026	0.53596	0.416212	100.381	0.455807	0.418623	101.032	112.515	80.1563	0.712406	0.686506
CADHealth_528	NA	1166.36	0.0424522	0.554002	0.136502	0.207241	0.0634291	281.928	1.23599	445.04	0.958628	527.123	0.747555	180.267	1.29573	1.61246	144.176	0.270878	6.89784	197.201	0.377788	0.350341	113.658	0.429706	0.167898	0.394349	0.324359	0.0401537	35.8579	0.944993	0.600428	0.354933	0.56557	58.487	50.8034	7.85369	96.1909	539.018	4.28413	0.452264	0.207167	103.102	0.394863	0.134792	94.5949	142.592	80.1788	0.562296	0.494383
CADHealth_536	NA	1131.98	0.0644667	0.456386	0.045573	0.0827791	0.0165868	285.672	0.949962	410.548	0.972341	538.608	0.510244	74.1549	0.422306	0.347564	204.156	0.234896	11.4202	200.879	0.381591	0.374559	109.176	0.720371	0.549864	0.759928	0.257386	0.0651464	34.2678	1.66726	0.672143	0.532345	0.424618	49.8273	32.1334	6.78508	99.4111	500.7	3.49727	0.423685	0.0989983	121.01	0.352109	0.105899	85.2958	135.628	58.807	0.433589	0.400612
CADHealth_540	NA	1032.38	0.0813041	0.440439	0.0160757	0.0254647	0.00839383	270.246	1.14056	499.431	0.949384	504.908	0.590084	158.982	2.37509	1.32161	218.131	0.389564	8.04269	217.819	0.39877	0.385846	112.274	0.686462	0.468836	0.679431	0.309973	0.0888481	35.2411	2.05681	0.634982	0.603652	0.530623	62.9423	59.6859	8.88854	91.9756	556.129	3.58963	0.46246	0.125224	112.535	0.676301	0.510824	91.095	112.571	81.7729	0.726414	0.696969
CADHealth_548	NA	710.877	0.0637319	0.474581	0.380625	0.933412	0.0947376	398.123	1.3167	439.957	0.861031	433.533	0.491846	55.9889	0.494	1.35371	117.631	0.299654	12.9655	110.48	0.205743	0.203652	112.042	0.678906	0.471124	0.684577	0.383787	0.182541	31.1815	0.433772	0.525258	0.332422	0.54468	40.6756	27.4456	8.75361	92.6356	576.89	4.16776	0.488301	0.157085	105.967	0.337783	0.0684285	74.8904	116.99	46.076	0.393844	0.361407
CADHealth_549	NA	1163.03	0.107327	0.695525	0.0448697	0.0766497	0.017267	353.429	0.993577	457.493	0.951831	549.048	0.79578	130.377	2.47696	1.38655	124.782	0.994359	6.10872	247.011	0.392426	0.390505	98.2766	0.886519	0.746723	0.857329	0.556474	0.0188611	31.3256	1.49463	0.588464	0.328401	0.764909	67.8901	62.744	5.32156	108.198	562.988	2.36244	0.860399	0.590744	145.485	0.855624	0.703634	131.924	141.919	126.332	0.890174	0.875079
CADHealth_550	NA	1061.2	0.0336799	0.413643	0.0320947	0.0791682	0.0148251	266.977	0.915326	470.44	0.967696	514.385	0.65176	108.737	2.2796	1.85814	302.626	1.13238	7.01595	271.612	0.430993	0.3828	113.012	0.489198	0.237298	0.485856	0.324029	0.0693775	34.2569	1.77514	0.585577	0.595317	0.393305	56.8124	36.6717	7.17892	98.916	518.073	3.03589	0.468231	0.10767	116.267	0.541668	0.332976	89.5254	126.468	72.4878	0.573169	0.546027
CADHealth_551	NA	1143.85	0.0509505	0.59973	0.0385744	0.0861317	0.0173556	292.209	1.07343	423.436	0.945362	503.022	0.30202	108.143	2.80205	2.06264	133.824	0.350303	17.7905	112.157	0.176888	0.149797	117.162	0.49266	0.214698	0.425978	0.320043	0.0168701	28.5173	0.734835	0.344567	0.126515	0.694496	59.1345	52.9782	8.65361	100.92	488.712	4.22455	0.367496	0.188669	121.701	0.649714	0.603711	85.6827	124.455	61.7874	0.496464	0.438067
CADHealth_552	NA	688.117	0.0725188	0.515615	0.0253498	0.0344151	0.0085546	267.989	1.34507	432.016	0.867479	522.545	0.670265	168.555	1.41478	2.6267	345.862	1.57055	9.99748	136.429	0.247545	0.286232	116.889	0.515249	0.25704	0.499678	0.239015	0.044194	34.8465	1.35391	0.316965	0.258754	0.38038	63.1919	47.3598	7.25976	79.9352	508.939	3.25157	0.714036	0.653403	99.4037	0.553362	0.487716	115.467	145.837	86.6555	0.594192	0.584903
CADHealth_553	NA	644.522	0.0795552	0.479021	0.0279789	0.0368826	0.0095457	258.718	1.2289	444.119	0.897233	503.025	0.678196	151.42	1.50559	2.32926	342.425	1.15072	12.2723	136.467	0.238921	0.279007	114.626	0.513545	0.253589	0.482574	0.225582	0.0246683	32.6634	1.32645	0.302856	0.258187	0.370657	60.3864	51.1902	7.35208	82.1875	511.489	2.99382	0.698857	0.705754	101.844	0.567217	0.553578	120.885	152.444	96.3798	0.632231	0.613398
CADHealth_555	NA	1072.96	0.0539719	0.590342	0.0811909	0.162434	0.0136838	497.867	0.89423	430.957	0.952947	505.203	0.338903	119.378	0.643881	1.85379	195.929	1.55553	14.7837	95.677	0.149918	0.156633	116.43	0.564151	0.293681	0.520712	0.433612	0.20753	24.6821	0.217003	0.530752	0.134376	0.555639	40.6428	32.6344	9.27187	65.8058	543.171	4.98697	0.555049	0.120629	75.1766	0.52929	0.213808	99.9627	122.523	89.2811	0.728691	0.715503
CADHealth_556	NA	1198.53	0.039691	0.468955	0.0417579	0.152411	0.0218762	695.768	0.983412	458.434	0.970856	509.952	0.305551	92.968	2.67177	2.57743	124.99	1.38087	13.1177	137.546	0.244822	0.273119	118.569	0.397172	0.199002	0.427718	0.321748	0.0470395	35.4499	0.701847	0.369768	0.157849	0.632777	47.4874	32.2999	8.72413	96.8451	546.576	5.02979	0.369564	0.0775853	111.875	0.49967	0.327469	87.182	129.965	73.3127	0.564095	0.522667
CADHealth_557	NA	978.51	0.0379465	0.474558	0.0196206	0.0268487	0.00947807	293.344	2.1945	415.95	0.906241	594.079	0.313406	66.1698	0.0711928	0.186802	114.551	0.0959299	14.057	168.62	0.283149	0.271416	121.251	0.510318	0.250502	0.479477	0.361826	0.0964385	30.1388	1.28965	0.627441	0.426594	0.268672	50.7822	31.273	12.5262	75.0542	642.079	7.53754	0.400806	0.0308412	92.5672	0.319375	0.00747302	64.8546	99.1056	37.5219	0.378605	0.334936
CADHealth_558	NA	1150.12	0.046953	0.493397	0.0491728	0.0919816	0.0114283	325.415	1.17277	436.482	0.948487	578.045	0.537274	151.755	0.99543	0.962422	122.691	0.559624	4.89157	242.639	0.500189	0.468394	105.186	0.700459	0.518258	0.765974	0.417727	0.165236	32.5999	1.42327	0.552615	0.380625	0.578772	55.9032	45.6693	7.55069	92.1968	532.158	3.63727	0.4885	0.235101	108.255	0.456924	0.183794	100.158	143.587	80.0133	0.557245	0.508011
CADHealth_559	NA	1016.5	0.0798793	0.727198	0.018734	0.0340953	0.0114481	377.697	1.06457	568.698	0.860245	514.569	0.855593	81.8895	1.87129	3.14334	145.386	1.18171	9.89675	112.229	0.174956	0.185776	114.56	0.558935	0.335115	0.601637	0.302122	0.00724133	29.8149	1.06154	0.41358	0.196229	0.589706	56.6949	45.0496	6.84441	107.354	523.071	3.35124	0.573822	0.275902	99.9433	0.517421	0.249065	86.0717	125.055	69.8435	0.5585	0.538819
CADHealth_560	NA	1020.19	0.0450727	0.504027	0.0414265	0.0919737	0.0125099	363.361	1.40295	457.004	0.933221	529.51	0.495893	187.795	2.74798	1.23804	205.041	0.599965	16.6588	92.8309	0.144075	0.136786	104.506	0.604616	0.349876	0.580596	0.226473	0.0391887	31.2424	1.87212	0.636091	0.524802	0.351054	61.0983	49.4041	5.56516	109.272	541.009	2.92846	0.759801	0.418519	130.932	0.693166	0.717489	152.546	182.7	139.755	0.764941	0.740496
CADHealth_561	NA	904.073	0.0385796	0.676912	0.0383892	0.0503817	0.0256611	359.576	1.18051	417.48	0.86775	402.87	0.468254	175.547	2.51207	3.84605	286.305	2.52184	8.94687	129.626	0.240641	0.241584	115.252	0.537296	0.294987	0.524259	0.377271	0.0270261	30.6403	0.578586	0.386747	0.109162	0.744809	36.9832	28.8231	9.18908	64.8195	527.415	4.42806	0.684769	0.261031	90.5681	0.665198	0.245006	71.808	82.475	61.979	0.751487	0.682408
CADHealth_562	NA	724.242	0.0741225	0.52642	0.122117	0.175459	0.0962359	503.768	1.36859	434.093	0.756322	400.655	0.537487	103.086	1.26983	1.95513	201.935	0.549515	10.7017	122.294	0.193313	0.194532	117.718	0.494621	0.212564	0.430278	0.388583	0.104658	34.6201	1.5896	0.684844	0.633008	0.592955	55.5005	51.6409	8.54305	70.0901	508.637	3.21781	0.712945	0.460844	79.8088	0.705976	0.330245	79.6729	109.11	63.1531	0.578803	0.579773
CADHealth_563	NA	1644.09	0.0561438	0.395459	0.0562479	0.0790973	0.0138224	282.459	1.20419	488.688	0.93691	497.902	0.365406	139.111	0.798746	1.68383	164.767	0.435394	11.6295	141.734	0.224123	0.205851	116.22	0.389753	0.130139	0.335654	0.320517	0.0621469	33.8979	1.41515	0.371495	0.343378	0.383735	52.2524	38.687	8.70073	95.0038	549.732	4.84335	0.369796	0.106631	102.215	0.407062	0.128617	79.7338	115.845	56.6558	0.489064	0.500791
CADHealth_564	NA	1078.27	0.0421577	0.571035	0.0231422	0.0448305	0.0187758	318.256	1.01045	432.019	0.926246	592.962	0.548489	130.418	2.00237	1.81747	252.491	1.04406	9.38915	170.005	0.284496	0.278848	116.958	0.501041	0.208251	0.416086	0.341648	0.059712	33.8778	0.929885	0.464251	0.34708	0.419251	60.1307	42.7978	6.91219	104.076	531.942	3.7156	0.535111	0.264252	113.987	0.462871	0.183042	99.3567	131.712	77.9356	0.591711	0.617424
CADHealth_566	NA	1301.16	0.0471371	0.361158	0.0568974	0.134315	0.0165609	442.878	1.2701	431.382	0.973486	535.327	0.441368	178.188	2.43995	1.98596	259.69	1.33047	11.8632	275.792	0.4498	0.448795	117.394	0.566455	0.304208	0.534441	0.298027	0.0633964	31.8569	0.534598	0.367233	0.104318	0.470824	50.9827	43.3596	6.68421	86.1087	527.334	2.74275	0.718282	0.668857	112.37	0.501941	0.390358	94.7882	133.299	76.5046	0.573932	0.481215
CADHealth_567	NA	594.198	0.0946838	0.547248	0.0803591	0.106355	0.0258501	375.091	1.81706	476.361	0.96567	558.313	0.423086	165.447	2.09982	1.14332	221.476	0.814668	12.1067	101.337	0.166307	0.149648	116.094	0.619891	0.367203	0.598727	0.459351	0.057506	29.9901	1.5954	0.837681	0.438042	0.696308	44.5906	33.078	9.18652	64.2804	564.178	3.13096	0.700713	0.300514	84.531	0.673053	0.402801	83.4247	94.6079	79.4194	0.839458	0.879036
CADHealth_568	NA	1091.59	0.0583273	0.573246	0.0952382	0.137193	0.0336257	483.578	1.48954	420.701	0.892337	552.814	0.398202	142.979	0.999808	3.66928	215.509	3.27123	16.3285	109.877	0.163028	0.137194	114.35	0.385875	0.151957	0.387872	0.318782	0.0664888	31.5499	0.408506	0.259909	0.0858242	0.433343	48.5262	33.3039	10.511	93.4768	604.518	4.05984	0.409087	0.270226	101.632	0.590716	0.418844	101.517	132.126	92.7773	0.702186	0.666644
CADHealth_569	NA	977.383	0.0683422	0.593714	0.0765769	0.110982	0.0329566	458.276	1.27672	456.791	0.917777	624.451	0.452574	116.558	2.37869	3.16226	188.792	1.86711	17.6454	120.057	0.171288	0.158005	113.804	0.406404	0.17368	0.416469	0.29809	0.0253437	31.2771	0.4693	0.332046	0.112606	0.457276	47.9917	34.2233	10.0518	91.715	556.177	3.69497	0.405834	0.247385	123.832	0.683684	0.663385	96.1177	132.758	80.3917	0.60555	0.611162
CADHealth_570	NA	517.215	0.0560544	0.426202	0.0475678	0.0924774	0.0313129	453.205	1.10038	527.629	0.669819	507.286	0.481118	103.637	0.614325	1.25645	234.796	0.526992	3.80695	87.3773	0.224234	0.231079	113.121	0.453184	0.169001	0.365297	0.269521	0.0621443	27.0825	0.199665	0.383137	0.0721576	0.514216	52.554	37.1649	8.16006	81.0468	502.847	2.73989	0.636562	0.378165	66.5947	0.625392	0.394406	53.6006	64.1247	53.2579	0.830537	0.81001
CADHealth_571	NA	587.516	0.0489915	0.341837	0.0601996	0.101274	0.0309403	419.357	0.969034	423.808	0.90004	471.864	0.444088	88.2439	0.769765	1.65617	284.335	0.627965	6.76469	158.148	0.294325	0.289659	123.114	0.390079	0.109969	0.281399	0.342323	0.089897	38.602	1.21489	0.446474	0.241519	0.444677	49.7883	27.6435	6.91638	85.4933	501.964	2.90006	0.665574	0.361231	92.9914	0.668965	0.338163	98.6903	126.651	84.8534	0.669976	0.64749
CADHealth_572	NA	1151.13	0.0395144	0.594228	0.0437128	0.0649858	0.0155748	277.953	1.03364	428.819	0.902636	526.31	0.716038	75.0356	0.308058	0.471292	100.989	0.265844	17.7657	119.936	0.186678	0.201806	115.343	0.458399	0.191126	0.416699	0.53556	0.0879682	23.9709	2.1108	0.512746	0.413839	0.543668	39.1447	24.8159	9.8186	74.3566	611.252	3.8741	0.627952	0.214869	92.4565	0.697055	0.375705	64.2229	82.1478	43.0852	0.524483	0.481341
CADHealth_573	NA	1249.97	0.0502926	0.497826	0.0231374	0.0440729	0.007529	345.125	0.961562	399.569	0.955379	615.941	0.173326	106.128	0.612117	0.620504	144.521	0.390098	16.1831	149.391	0.220803	0.240532	114.491	0.630814	0.420248	0.663103	0.3754	0.0734615	35.9016	1.7177	0.679403	0.429098	0.300171	45.1122	27.1688	7.78087	97.7419	548.603	4.19915	0.514827	0.189073	101.758	0.417636	0.193662	69.8348	124.006	45.7568	0.36899	0.303703
CADHealth_574	NA	965.677	0.0298087	0.51446	0.0192447	0.0386835	0.00811892	280.219	0.95812	413.481	0.920977	518.089	0.434294	196.942	1.82952	1.89226	290.573	0.786424	10.8615	153.341	0.23806	0.228324	120.398	0.308563	0.0818453	0.266693	0.390236	0.152059	28.8605	0.313889	0.232261	0.047177	0.372027	51.4418	42.789	7.79676	99.8595	488.729	4.42227	0.397948	0.205736	101.13	0.310315	0.0712166	76.5092	101.348	67.7077	0.668074	0.735652
CADHealth_575	NA	948.435	0.0458785	0.542284	0.0583075	0.113872	0.0178221	261.986	1.35927	633.48	0.973831	595.093	0.582169	183.93	1.77082	0.670259	234.633	0.274746	9.02148	239.344	0.375546	0.307687	106.1	0.446387	0.177248	0.388193	0.310523	0.054751	41.4105	1.59711	0.457228	0.630534	0.401464	56.4291	38.0572	6.75504	100.628	502.831	2.81754	0.577263	0.464237	127.961	0.766398	0.598909	115.322	151.961	98.0102	0.644969	0.597587
CADHealth_576	NA	1181.4	0.085145	0.629663	0.0658306	0.152065	0.0212011	772.289	1.04595	434.692	0.98846	460.836	0.670521	102.339	2.19354	1.00974	134.542	0.366481	9.42353	159.386	0.246471	0.208733	119.859	0.420876	0.156089	0.367335	0.433413	0.0767804	25.7444	0.457314	0.354788	0.0609724	0.392853	49.8708	42.3915	8.77012	70.044	549.295	4.08407	0.633485	0.32705	100.56	0.555189	0.305725	74.1753	104.183	55.7031	0.534663	0.505084
CADHealth_2	NA	695.71	0.0661942	0.405871	0.140446	0.282918	0.022072	375.8	1.0531	371.453	0.843878	479.193	0.360756	144.548	1.461	0.816951	336.101	0.535864	8.08794	356.318	0.560765	0.589606	116.614	0.418825	0.15717	0.359263	0.219595	0.0310184	41.1231	0.930412	0.496715	0.283906	0.307808	49.6684	30.2366	5.99221	110.033	526.696	3.59672	0.586599	0.271562	125.659	0.546512	0.209266	96.3054	139.019	74.7317	0.537565	0.463245
CADHealth_3	NA	1074.17	0.0384154	0.447282	0.114532	0.14987	0.0231731	307.95	1.29472	407.028	0.947826	501.202	0.263705	128.77	1.06042	1.44582	178.561	0.842785	7.98348	293.763	0.509022	0.476029	117.245	0.547652	0.324687	0.590096	0.492849	0.132206	24.8214	0.786932	0.580375	0.176894	0.555271	45.1817	33.4967	9.35267	58.3171	492.915	3.26647	0.70984	0.529262	66.6303	0.434139	0.0937298	59.3591	81.6752	39.8967	0.48848	0.463755
CADHealth_4	NA	1177.73	0.0577035	0.611154	0.0803801	0.117399	0.0252463	273.299	0.951717	495.632	0.973864	503.15	0.582772	118.005	2.47789	1.92902	157.382	1.31319	16.1809	106.427	0.247987	0.224874	113.644	0.577829	0.306256	0.545474	0.532978	0.133006	22.9991	1.07127	0.565988	0.27558	0.524563	43.8832	35.4516	9.33369	61.0155	498.913	4.07914	0.638584	0.212969	71.7819	0.754064	0.373931	79.4418	93.6055	68.6507	0.733405	0.708746
CADHealth_5	NA	814.391	0.0549026	0.405218	0.0176607	0.0445624	0.00914286	295.649	1.0562	418.843	0.936956	450.45	0.565044	219.827	2.6689	2.52954	338.05	1.96614	8.15993	209.673	0.399062	0.366276	116.701	0.437545	0.160904	0.373231	0.310039	0.111632	34.9148	0.96635	0.651919	0.220659	0.452587	64.7116	48.558	7.43032	99.2227	488.844	3.89466	0.450868	0.200021	107.068	0.376398	0.168351	104.158	128.861	82.8547	0.642979	0.583276
CADHealth_6	NA	1442.61	0.0489709	0.394062	0.0747742	0.132085	0.0193732	723.431	0.9997	506.585	0.962963	622.016	0.362274	143.031	1.63984	0.921544	284.615	0.43061	9.3464	296.179	0.502536	0.497897	120.467	0.418573	0.162793	0.382217	0.384941	0.0766561	26.9806	0.398024	0.809347	0.39827	0.800936	51.8422	37.4333	6.81356	99.3951	546.647	3.84392	0.434959	0.169611	91.8613	0.388267	0.128126	75.9044	91.9738	58.426	0.635246	0.644368
CADHealth_7	NA	797.862	0.0441713	0.430149	0.0451164	0.0866914	0.0113535	303.242	1.01007	414.627	0.960899	549.666	0.499687	145.358	1.89679	0.904452	74.0143	0.559573	9.28355	137.224	0.225957	0.213114	121.738	0.663731	0.41732	0.631831	0.302007	0.112947	33.0154	1.30828	0.446337	0.251851	0.478557	51.5633	37.7503	8.38951	88.2586	522.106	5.59816	0.425057	0.230404	108.093	0.458877	0.366236	75.0541	127.39	53.1995	0.41761	0.337025
CADHealth_8	NA	1195.85	0.0731849	0.498385	0.179123	0.305916	0.0363921	278.284	1.04673	429.101	0.890648	511.78	0.462612	137.817	2.42197	1.99636	245.896	1.45047	7.05736	200.705	0.299334	0.281725	104.357	0.729655	0.543192	0.73097	0.596995	0.265213	29.1905	1.54252	0.583885	0.458635	0.801006	48.8724	43.0505	5.18414	109.09	520.834	2.17318	0.850515	0.883256	123.273	0.867464	0.502237	91.9159	96.7635	79.1727	0.818208	0.810742
CADHealth_9	NA	876.423	0.0906736	0.631581	0.0852968	0.119586	0.0396885	488.545	0.993122	486.803	0.924784	564.393	0.602939	111.687	1.67892	0.918544	179.839	0.678761	8.06557	191.943	0.328602	0.307907	103.712	0.73398	0.552078	0.756534	0.544958	0.109465	32.2772	0.475161	0.632083	0.124303	0.604429	55.0295	45.5975	7.22291	89.285	556.83	2.83229	0.7693	0.389637	108.414	0.827311	0.422844	105.012	114.387	92.1295	0.805418	0.852737
CADHealth_10	NA	1079.86	0.0500596	0.677497	0.0258529	0.0580819	0.00915332	293.813	0.983415	426.852	0.901939	500.454	0.324671	124.36	1.44843	0.923528	224.042	0.574783	7.33637	174.817	0.296436	0.321289	112.433	0.676963	0.480063	0.716939	0.286066	0.0446839	30.9945	1.00794	0.553228	0.240371	0.676458	52.4702	34.7576	6.43707	97.4612	518.852	2.97972	0.692612	0.473276	116.075	0.586183	0.408487	97.9177	130.571	74.7604	0.572564	0.524523
CADHealth_11	NA	965.844	0.0455896	0.559966	0.024102	0.15089	0.00881183	333.863	1.08311	418.695	0.95835	575.987	0.492128	190.604	2.52438	1.85674	241.601	1.61706	8.41711	226.132	0.432727	0.47109	125.392	0.407342	0.122012	0.296936	0.271817	0.041445	29.8519	0.832516	0.477948	0.116138	0.625677	43.0273	41.2674	8.27216	73.5323	598.081	3.63358	0.718265	0.501266	93.1937	0.72332	0.471457	91.4268	110.249	84.8337	0.769475	0.684107
CADHealth_13	NA	1051.92	0.0676997	0.66904	0.208619	0.583387	0.0733868	622.002	1.25591	436.798	0.968197	458.574	0.610943	175.143	3.50657	2.55669	277.008	1.41341	13.8285	163.28	0.249051	0.236272	111.022	0.627814	0.435931	0.660248	0.374486	0.0694194	32.1459	0.889574	0.530289	0.26915	0.47188	76.9854	61.7022	4.74845	111.507	519.65	2.41222	0.832415	0.663941	135.851	0.733124	0.45025	158.692	163.468	147.315	0.901184	0.905216
CADHealth_14	NA	1170.41	0.0274836	0.487492	0.0340756	0.0497029	0.0146912	273.127	0.923446	428.314	0.875095	556.17	0.464834	79.0112	0.295247	1.09199	130.185	0.424077	13.3095	154.422	0.232746	0.230212	116.95	0.333324	0.0912623	0.23891	0.294587	0.035798	28.7876	0.755852	0.329747	0.109437	0.387013	84.6669	67.7812	6.778	101.854	487.304	3.54184	0.45059	0.205334	112.386	0.320742	0.0857108	78.7614	128.3	43.3923	0.338208	0.280508
CADHealth_15	NA	1010.83	0.0786853	0.600926	0.100561	0.160866	0.039616	399.36	1.59458	452.054	0.829292	474.209	0.792778	76.6058	0.567382	1.76487	120.483	0.28901	11.0277	109.824	0.199143	0.21204	110.39	0.533242	0.267913	0.479478	0.309237	0.0635216	30.9016	0.824957	0.576349	0.293676	0.484102	47.0765	33.5661	8.94988	95.5422	541.459	4.31705	0.441528	0.13854	113.201	0.463713	0.146776	87.5023	130.106	61.2692	0.470916	0.514065
CADHealth_16	NA	1017.9	0.0872387	0.599414	0.104692	0.173496	0.0434009	385.344	1.54488	449.966	0.837139	458.818	0.695249	75.986	0.624768	1.5514	129.223	0.246094	10.6454	123.741	0.224962	0.214332	110.346	0.499495	0.225862	0.424335	0.328911	0.138211	29.6331	0.62901	0.511016	0.162905	0.508938	48.6876	34.856	8.80342	95.2678	562.536	4.20064	0.42213	0.109338	108.16	0.444865	0.130601	81.3829	121.597	58.1878	0.478531	0.487095
CADHealth_17	NA	924.992	0.0950118	0.569696	0.24895	0.647428	0.0456416	332.998	1.04566	474.696	0.966532	741.529	0.576541	178.727	3.66615	1.02426	223.375	0.791247	10.7851	142.382	0.222557	0.233484	102.043	0.728375	0.594223	0.813114	0.449735	0.164186	26.4795	1.00902	0.545571	0.19139	0.434183	42.5029	34.4122	7.23474	78.935	475.237	3.47056	0.664133	0.290358	95.8742	0.713153	0.319459	131.39	135.624	124.533	0.918218	0.958744
CADHealth_18	NA	1484.94	0.041346	0.590996	0.106909	0.18791	0.0204911	434.866	0.981461	422.056	0.861907	545.897	0.525978	182.495	2.49019	1.23414	168.292	0.616972	8.88775	183.73	0.341078	0.291521	116.733	0.423282	0.1822	0.418785	0.239921	0.0687465	30.4847	1.71378	0.486753	0.571022	0.413435	72.8389	57.8192	7.04474	95.5521	582.852	4.09062	0.594943	0.32242	114.655	0.553475	0.416693	86.9987	122.822	67.5228	0.54976	0.502924
CADHealth_19	NA	1560.99	0.0553551	0.534251	0.0859512	0.151056	0.0240884	685.264	1.0582	429.075	0.941658	555.212	0.35631	140.719	1.44468	1.13842	177.356	0.538887	11.4834	129.508	0.190985	0.183714	121.369	0.441477	0.197784	0.43411	0.409682	0.0669791	30.2188	0.16682	0.364796	0.160361	0.274573	41.9768	26.3673	7.6797	101.368	638.331	3.54088	0.472443	0.375276	108.872	0.436142	0.193038	99.5135	130.236	89.4242	0.686633	0.620391
CADHealth_20	NA	826.706	0.0544918	0.664792	0.0365828	0.0815908	0.0130355	408.919	1.41145	462.056	0.975567	644.775	0.294299	186.616	1.75245	1.99156	276.7	1.02709	9.74761	303.518	0.487288	0.48358	110.872	0.4529	0.178776	0.390932	0.385701	0.0526802	36.5411	0.666261	0.475997	0.124919	0.532769	51.914	43.2529	8.99084	81.4988	550.038	5.60741	0.423425	0.1135	103.258	0.532973	0.222161	126.369	142.327	109.246	0.767569	0.768483
CADHealth_21	NA	859.671	0.0553072	0.669757	0.0450319	0.0628089	0.0270174	443.507	1.36925	597.493	0.970533	436.84	0.414181	125.12	1.32075	2.16877	321.945	1.59175	8.22285	163.649	0.2953	0.290408	115.396	0.452896	0.156582	0.352846	0.540641	0.107102	42.3058	1.89994	0.767641	0.673458	0.631092	46.4844	35.7644	7.54982	84.9328	584.021	3.20353	0.701532	0.551777	84.6634	0.747862	0.235991	80.2812	103.365	71.3329	0.690108	0.756277
CADHealth_22	NA	1332.31	0.0438081	0.37972	0.0295215	0.0519527	0.00696512	322.665	0.889564	485.382	0.984073	550.359	0.343478	146.51	1.70272	0.832687	192.099	0.6081	15.8705	190.538	0.335435	0.314059	117.434	0.557702	0.309366	0.546668	0.32725	0.119948	33.2684	2.13589	0.600492	0.574933	0.361706	48.3918	31.5522	7.90245	98.7984	546.037	4.76626	0.395194	0.173062	100.578	0.530159	0.373797	68.8265	113.792	44.8205	0.39388	0.32683
CADHealth_23	NA	1022.01	0.100022	0.593673	0.0914846	0.167013	0.0240836	384.051	1.24134	525.528	0.965423	597.746	0.413592	143.309	1.76565	1.53145	256.929	1.15624	7.23943	300.477	0.533794	0.529554	105.167	0.684185	0.453734	0.691233	0.354726	0.234037	28.6394	1.13241	0.535246	0.225236	0.820576	51.9309	47.8776	7.06032	75.7398	528.207	2.15665	0.915048	0.67083	97.0126	0.78161	0.446896	91.8159	103.4	79.9701	0.773409	0.813438
CADHealth_25	NA	751.514	0.0873256	0.585332	0.17485	0.25391	0.0647978	278.057	0.960119	475.158	0.967997	511.573	0.540505	97.9472	1.56449	0.980187	77.7578	0.607037	6.71689	156.879	0.246539	0.240223	102.601	0.678015	0.499707	0.748631	0.376421	0.174614	30.0576	0.89174	0.404077	0.260877	0.427647	55.069	45.0412	6.29326	102.185	509.468	2.42302	0.70038	0.77206	117.15	0.565572	0.487549	87.6757	138.069	72.6976	0.52653	0.484108
CADHealth_26	NA	1293.4	0.0288962	0.408247	0.0955598	0.212321	0.02626	603.235	1.09524	407.951	0.926004	516.736	0.364421	130.497	2.33812	3.65324	237.598	1.84162	6.92596	282.74	0.448551	0.41589	116.594	0.581706	0.325139	0.569504	0.268612	0.135861	29.5657	0.514942	0.292074	0.0963451	0.322407	48.6568	30.1862	7.80608	92.5687	519.029	4.43514	0.443054	0.165654	105.841	0.295503	0.117428	77.5236	124.745	48.7977	0.39118	0.375905
CADHealth_27	NA	718.658	0.0411446	0.499311	0.0318913	0.0726607	0.0178253	672.889	1.04274	432.973	0.857174	601.781	0.375086	165.284	1.28461	2.39563	319.491	1.69903	10.485	142.56	0.224752	0.228425	120.381	0.381209	0.147355	0.377016	0.338885	0.0943925	31.5486	0.910384	0.549798	0.241262	0.432901	46.111	31.1627	8.54451	96.7118	574.047	4.99274	0.343103	0.0816521	111.69	0.34719	0.173721	86.5364	128.515	76.1524	0.592558	0.562236
CADHealth_28	NA	1099.12	0.0588741	0.472761	0.032088	0.0529314	0.0148916	294.157	1.58404	443.918	0.961273	551.557	0.717019	143.1	3.79972	2.25768	143.402	1.22793	11.7008	110.035	0.165339	0.151483	101.174	0.494756	0.233782	0.472909	0.401056	0.15305	30.4755	0.685415	0.702231	0.281754	0.744244	51.7331	44.3244	7.55462	74.8533	516.247	2.89917	0.804392	0.340477	77.7405	0.766489	0.288985	91.3397	97.9334	83.8132	0.855819	0.849691
CADHealth_29	NA	1195.02	0.0644448	0.377864	0.157604	0.254864	0.0387261	280.899	1.27896	553.334	0.956821	529.787	0.334676	155.449	2.6866	2.68285	231.244	2.17354	13.4138	151.22	0.243177	0.230538	120.194	0.337308	0.122141	0.345756	0.378557	0.0309585	31.1855	0.135723	0.33749	0.0621242	0.472844	52.1868	30.3556	9.70544	91.6221	572.995	5.51145	0.327625	0.086209	112.875	0.451209	0.246409	114.722	153.265	92.2442	0.601861	0.567637
CADHealth_30	NA	976.047	0.0326093	0.641718	0.025109	0.0573582	0.0108292	350.517	1.79407	411.284	0.85721	602.642	0.351098	203.404	2.7836	2.9447	286.089	1.3779	9.68918	188.241	0.287947	0.281136	111.097	0.563852	0.322801	0.561441	0.339236	0.0669697	31.8702	0.644113	0.602987	0.0892767	0.400316	50.1391	30.7524	9.22439	94.3664	591.71	4.32507	0.459847	0.152215	105.706	0.534087	0.320589	64.7386	93.0138	54.7987	0.589146	0.600224
CADHealth_31	NA	1349.63	0.0487092	0.588035	0.0736852	0.132766	0.0156573	279.767	1.189	459.221	0.965959	531.661	0.58561	201.752	1.76813	1.45743	196.481	0.754197	9.6873	237.803	0.402336	0.40471	116.403	0.393934	0.145651	0.370578	0.236711	0.0469453	36.1738	2.16148	0.605703	0.583833	0.38124	65.8215	45.7799	7.59027	91.0746	507.03	3.1837	0.605303	0.577351	93.4366	0.606079	0.449261	85.2067	113.326	71.9017	0.634468	0.641784
CADHealth_32	NA	1213.49	0.0588346	0.682474	0.0683737	0.192828	0.0286779	287.389	0.995085	429.625	0.884024	530.152	0.557319	140.55	1.58569	2.09203	184.996	0.680147	11.6672	206.814	0.333256	0.362849	113.67	0.502971	0.262282	0.500811	0.183152	0.0514274	32.6623	0.874219	0.324619	0.199726	0.638143	62.078	47.4849	6.84225	99.6554	523.04	3.46892	0.519345	0.247422	106.693	0.39428	0.159017	87.6208	122.314	68.3499	0.558806	0.583999
CADHealth_33	NA	1141.65	0.0455089	0.363311	0.0209923	0.0330596	0.0103789	329.354	1.23303	549.444	0.926663	550.754	0.554524	179.73	0.870884	1.64084	169.792	0.628349	9.64548	233.994	0.374351	0.322958	98.1401	0.879826	0.830178	0.902383	0.303261	0.266351	27.9917	1.89944	0.519295	0.633139	0.542721	88.1517	82.6157	4.64483	120.376	552.375	2.0654	0.888603	0.72599	151.2	0.828526	0.411539	130.675	156.897	119.548	0.761954	0.703032
CADHealth_34	NA	419.75	0.0883635	0.670836	0.160712	0.210738	0.0931303	824.8	1.48771	467.663	0.872686	483.844	0.520761	165.502	1.27161	2.9496	155.429	1.54736	9.22273	127.958	0.20847	0.271666	111.07	0.612572	0.391505	0.646963	0.378024	0.0950052	28.5675	0.654087	0.547102	0.161632	0.391725	50.8942	36.8168	10.6853	82.2704	646.344	4.91516	0.453176	0.275922	106.613	0.707033	0.468723	85.5083	117.99	63.1886	0.535541	0.531902
CADHealth_36	NA	1285.39	0.0576445	0.490891	0.0711125	0.105658	0.0163511	494.642	0.893273	408.826	0.989841	533.333	0.21802	126.885	2.66543	1.94226	172.326	1.40773	9.76954	149.387	0.231038	0.198673	120.936	0.328413	0.0991956	0.303556	0.709853	0.15071	24.8624	0.416702	0.585365	0.336868	0.536896	36.5525	21.8955	7.52198	63.6061	474.631	5.44381	0.597686	0.159794	70.6206	0.49575	0.223122	74.1945	94.5447	58.8829	0.622805	0.606751
CADHealth_37	NA	1042.75	0.0871236	0.671327	0.134973	0.273725	0.0576302	566.664	0.985191	422.986	0.921444	533.605	0.599088	144.551	0.677509	3.12436	278.096	0.727629	10.1664	154.993	0.24293	0.211641	122.93	0.325152	0.0986293	0.300732	0.449343	0.0306254	36.2932	0.880237	0.405106	0.216708	0.441774	53.4943	44.6489	8.21031	81.1908	533.245	3.09634	0.675495	0.606891	116.52	0.444703	0.282085	78.5784	125.087	53.1614	0.424994	0.406079
CADHealth_38	NA	979.588	0.094938	0.690509	0.107153	0.214625	0.0389935	505.247	1.22659	431.519	0.930415	518.236	0.730589	130.147	1.16027	2.84832	244.339	0.955907	8.53839	167.534	0.274109	0.237958	120.427	0.331927	0.0812391	0.246204	0.317716	0.0255596	40.1615	0.831923	0.364584	0.200486	0.629733	56.3128	52.3169	4.9095	112.772	463.852	2.39333	0.770742	0.505989	127.87	0.520505	0.308694	94.3569	135.076	73.0728	0.540976	0.543837
CADHealth_39	NA	662.605	0.0757621	0.680293	0.0714938	0.0996704	0.0338926	457.365	1.22399	444.067	0.956357	566.813	0.510063	150.604	1.80781	1.49493	198.789	1.17222	8.68416	233.912	0.422153	0.394699	105.095	0.564572	0.327334	0.581435	0.495749	0.241448	28.8547	1.29484	0.636711	0.363019	0.56838	54.9665	43.348	6.21419	98.3197	569.034	2.84082	0.816178	0.331662	129.818	0.766365	0.61626	131.767	141.984	124.231	0.874964	0.84476
CADHealth_40	NA	971.309	0.0250685	0.490623	0.0680536	0.0785393	0.0334918	276.133	1.43272	437.81	0.919117	582.283	0.505791	188.739	0.883529	3.85748	313.022	1.60453	7.8345	262.112	0.454263	0.441075	119.244	0.380911	0.134532	0.339366	0.311142	0.178674	24.4532	1.2368	0.7203	0.235149	0.466767	52.8444	48.4928	8.65455	64.8701	552.721	4.5356	0.799545	0.277522	86.9598	0.804445	0.339704	107.644	123.816	94.3045	0.761651	0.709632
CADHealth_41	NA	1231.64	0.0469068	0.657936	0.0228074	0.0418229	0.014429	304.202	1.12881	619.859	0.862712	511.455	0.435061	176.882	1.36602	1.27573	144.553	0.682613	8.81711	149.103	0.269583	0.27672	116.552	0.447767	0.197767	0.392947	0.489427	0.24626	32.6318	1.2947	0.410185	0.368831	0.638446	41.8306	33.0046	11.1551	61.9478	605.832	2.73707	0.55739	0.0587485	60.0371	0.726413	0.393967	65.1596	86.5142	52.2006	0.603376	0.607525
CADHealth_42	NA	684.538	0.057515	0.437097	0.0110851	0.0224004	0.00870472	306.316	2.49945	506.596	0.935875	629.089	0.326674	117.548	1.4307	1.82023	186.492	0.688362	15.3559	141.622	0.239517	0.241857	115.028	0.603235	0.371008	0.603065	0.384548	0.100616	25.2229	1.00576	0.624998	0.240725	0.440899	41.7573	30.5367	15.459	59.3708	678.034	3.06637	0.486216	0.422954	51.1218	0.325157	0.184821	33.8958	55.7593	25.4032	0.455586	0.441431
CADHealth_43	NA	1305.39	0.038097	0.452992	0.0248933	0.0406749	0.0123201	317.394	1.0942	443.451	0.973192	512.484	0.471051	64.6957	0.4492	0.493014	213.06	0.283933	8.13499	288.518	0.550582	0.46261	114.303	0.411353	0.149823	0.36218	0.260352	0.114486	33.4504	1.46944	0.603428	0.531277	0.371589	52.6319	37.1776	8.80949	90.1886	573.65	5.03468	0.438103	0.0818812	101.092	0.43323	0.121356	68.0732	113.831	41.6223	0.36565	0.297425
CADHealth_44	NA	1269.55	0.0755297	0.598851	0.0187351	0.0325917	0.00928402	308.311	1.04589	524.496	0.967464	461.399	0.548629	98.8807	1.3781	1.81066	216.803	0.883131	4.25567	187.497	0.323585	0.326258	118.985	0.350534	0.150413	0.416898	0.269639	0.0528461	26.957	2.00533	0.560358	0.424993	0.310714	51.2677	37.7212	7.13394	103.449	509.9	4.3535	0.45778	0.19547	113.353	0.497532	0.482373	73.19	117.936	50.6004	0.429049	0.362654
CADHealth_45	NA	1396.79	0.0713218	0.57581	0.0179618	0.0353922	0.00734253	321.411	1.01237	517.337	0.903928	463.878	0.5823	98.0514	1.30759	1.85824	223.724	0.901035	4.50616	187.181	0.317383	0.318582	121.707	0.322303	0.120667	0.3617	0.314842	0.110069	29.3413	1.65223	0.447095	0.387154	0.307834	48.0727	36.716	8.12959	102.768	549.075	4.81666	0.410016	0.133693	113.844	0.421808	0.438254	71.4586	109.758	45.0289	0.410255	0.349817
CADHealth_46	NA	935.247	0.0618802	0.66475	0.131669	0.320835	0.0248292	451.592	1.80483	432.117	0.927434	456.945	0.718524	167.556	2.94531	1.52573	180.212	1.08807	8.8631	196.071	0.312585	0.265791	87.0619	0.935546	0.8852	0.94543	0.638739	0.426936	26.2808	0.750983	0.60398	0.567475	0.718336	62.3064	60.8929	6.76696	87.0623	546.008	2.00027	0.883384	0.65842	113.927	0.867822	0.89381	131.21	139.067	125.62	0.903306	0.888078
CADHealth_47	NA	1145.16	0.0479642	0.463305	0.0622779	0.0886718	0.0202043	782.561	1.71744	591.143	0.891509	578.31	0.442905	107.06	2.39519	2.63698	136.41	2.1554	14.2589	155.472	0.264074	0.244163	116.093	0.463249	0.17579	0.369892	0.310015	0.0107251	27.9553	0.871653	0.384612	0.197635	0.274978	45.5236	24.2148	10.7113	90.9722	657.149	4.48773	0.384231	0.293547	118.495	0.511518	0.22616	94.4431	133.452	69.42	0.520187	0.51788
CADHealth_49	NA	1212.2	0.039277	0.554656	0.0299459	0.0548869	0.0135215	311.65	1.01165	396.688	0.948353	478.014	0.570574	149.314	1.64102	1.78532	250.809	1.18673	11.9025	208.298	0.353871	0.308379	124.629	0.30564	0.0594397	0.156414	0.306095	0.0720964	36.5468	0.891222	0.714465	0.213429	0.35582	46.2896	22.7017	5.76529	106.117	405.629	2.57208	0.412688	0.219822	118.48	0.357434	0.136817	78.0692	99.782	54.4713	0.545903	0.538924
CADHealth_50	NA	982.858	0.0378837	0.462916	0.0527291	0.0998011	0.0158344	837.068	1.51173	416.721	0.752567	580.711	0.521689	174.375	1.87286	2.77771	254.274	1.40719	13.2863	107.134	0.162323	0.155698	111.606	0.483907	0.220366	0.450763	0.339591	0.0392341	30.7426	0.937948	0.558213	0.305038	0.329911	45.7746	22.3913	10.5349	85.8396	596.157	5.33298	0.427363	0.190474	102.414	0.588073	0.49757	93.9273	123.293	69.4293	0.563124	0.608612
CADHealth_51	NA	1213.99	0.0220833	0.684626	0.045071	0.117962	0.0147056	494.781	0.916982	519.267	0.944028	446.887	0.457131	151.451	1.24777	2.23831	171.343	1.58266	10.726	203.548	0.350806	0.282904	121.705	0.483508	0.271766	0.481712	0.347923	0.155763	31.057	0.839971	0.52473	0.186612	0.485497	44.2425	35.207	9.0272	87.7238	542.477	4.48389	0.460949	0.116464	103.712	0.475814	0.257731	67.6426	110.3	48.3489	0.438341	0.488317
CADHealth_52	NA	914.371	0.101219	0.574388	0.0922385	0.148365	0.0358808	300.081	1.0826	446.489	0.97485	642.993	0.733248	191.113	4.07825	3.17859	313.099	2.64477	6.94455	244.751	0.405286	0.387366	99.551	0.547728	0.285822	0.50513	0.330547	0.0202885	49.4996	0.814309	0.398402	0.182596	0.812655	85.2581	73.2396	3.82047	152.923	554.737	2.17476	0.809519	0.452328	163.864	0.779914	0.583539	192.334	200.162	182.268	0.910603	0.889061
CADHealth_53	NA	728.311	0.0512033	0.387002	0.036509	0.0511106	0.0104202	300.709	0.897293	629.559	0.971281	527.746	0.147266	62.0223	0.624233	0.166371	172.178	0.10289	33.7398	133.04	0.195367	0.158769	123.544	0.411499	0.159018	0.383467	0.462727	0.152252	30.615	1.68617	0.614034	0.499042	0.403223	44.3958	21.7287	6.72214	91.0725	418.891	3.57438	0.436969	0.178257	103.599	0.491352	0.427809	64.7035	95.5863	35.7932	0.37446	0.339004
CADHealth_54	NA	1124.25	0.0533053	0.628997	0.188953	0.289298	0.067629	406.965	1.83143	417.702	0.936157	701.382	0.437633	121.254	2.34743	2.27356	236.575	0.694659	8.3291	207.115	0.357532	0.378224	113.928	0.437943	0.20987	0.482053	0.557815	0.343148	30.0817	1.67529	0.590454	0.400438	0.432741	49.0649	30.8936	10.2843	88.6662	631.769	2.73702	0.487396	0.526697	87.4621	0.748516	0.249402	99.0846	112.303	93.4264	0.831916	0.829434
CADHealth_55	NA	1087.75	0.0500488	0.513107	0.182798	0.289504	0.0541964	317.31	1.41262	432.68	0.970306	535.487	0.381233	77.0305	2.41572	2.86295	276.874	1.38765	20.1513	152.461	0.225391	0.23257	122.815	0.365196	0.144291	0.390027	0.527949	0.148011	34.0878	1.33691	0.350583	0.276772	0.531584	45.575	35.1257	10.1848	62.3068	569.924	5.03499	0.605571	0.357053	73.8984	0.561964	0.189987	60.1355	72.7138	41.6393	0.572646	0.503835
CADHealth_56	NA	823.811	0.041159	0.506406	0.0562745	0.114613	0.0151856	768.124	1.24225	426.086	0.97915	525.29	0.136047	198.82	3.22808	2.58984	210.435	1.19923	5.83064	229.449	0.387951	0.367081	118.492	0.559097	0.261097	0.466425	0.472705	0.159342	28.3581	0.391928	0.522295	0.164073	0.521728	43.2172	31.1186	10.2873	80.1253	538.727	5.20749	0.437648	0.140742	100.914	0.488751	0.388921	72.2643	109.041	56.7818	0.520738	0.505169
CADHealth_57	NA	2441.85	0.0785514	0.512044	0.0979242	0.284806	0.0183925	288.906	1.44666	633.359	0.922275	464.819	0.358855	163.418	0.475735	1.78789	248.642	0.840126	18.0183	137.126	0.256415	0.264986	123.369	0.381148	0.134783	0.357611	0.333506	0.0376972	37.9991	0.824623	0.309742	0.120378	0.558247	43.6369	37.2329	10.8444	99.1535	645.854	5.71617	0.330981	0.246983	70.4425	0.551802	0.359581	78.7433	95.7728	62.3474	0.650993	0.611336
CADHealth_58	NA	1082.01	0.0336055	0.649762	0.0219874	0.0478851	0.00743024	292.962	0.94491	400.714	0.88517	538.765	0.264046	258.213	2.92426	2.15564	332.472	1.14305	7.85476	218.467	0.375681	0.369357	115.161	0.742172	0.553979	0.753552	0.614044	0.262828	24.7072	0.785025	0.53958	0.182096	0.761272	46.1076	39.4042	9.87056	59.2479	505.995	3.64719	0.596119	0.123358	70.4234	0.599852	0.253912	75.1897	78.2205	60.2696	0.770509	0.786423
CADHealth_60	NA	1049.72	0.0540272	0.568293	0.0397138	0.0693436	0.0202395	264.453	2.40968	530.708	0.92259	457.877	0.623125	97.2185	0.0929761	0.166729	157.339	0.0763461	6.59462	165.901	0.329748	0.322866	103.065	0.740808	0.5839	0.806023	0.613196	0.208135	43.1674	1.18633	0.570388	0.576376	0.834431	36.5337	33.1545	10.5372	55.2749	547.89	2.08419	0.857601	0.646086	70.6911	0.828814	0.603054	58.1549	68.231	53.0785	0.777923	0.759718
CADHealth_61	NA	1057.36	0.0582663	0.589331	0.0381432	0.0666667	0.0170847	267.907	1.10283	492.486	0.901552	506.01	0.640162	175.329	1.78853	1.17232	219.478	0.653054	7.43097	218.502	0.349605	0.341028	94.9242	0.874393	0.818488	0.913824	0.455854	0.221908	49.6811	1.33774	0.696704	0.710023	0.735018	85.3617	81.013	5.01849	134.486	597.193	2.38265	0.759143	0.415561	130.802	0.826074	0.628012	121.834	144.847	108.939	0.752095	0.72661
CADHealth_62	NA	1104.47	0.0611727	0.564811	0.0387844	0.0705442	0.0134095	267.936	1.10697	476.767	0.896091	528.356	0.536244	179.641	1.91808	1.16512	225.547	0.616753	8.16192	207.598	0.333959	0.327688	94.4483	0.881203	0.823036	0.925332	0.428407	0.164373	48.5846	0.99973	0.5986	0.52253	0.616878	75.8763	69.297	5.55671	115.393	586.829	2.80601	0.855751	0.369174	125.763	0.703388	0.567809	109.173	140.567	98.0027	0.697193	0.645872
CADHealth_63	NA	1139.24	0.0333232	0.545368	0.0597602	0.073662	0.0237453	331.319	1.24841	413.05	0.886196	459.97	0.56446	154.761	1.4244	1.33722	152.603	0.954839	16.7518	257.504	0.459976	0.485282	116.31	0.352799	0.086838	0.241697	0.251994	0.0258655	48.3738	2.11698	0.512469	0.536015	0.327593	48.4074	32.991	8.51843	98.5525	553.941	4.07406	0.404283	0.253973	111.652	0.333523	0.151796	81.9608	125.323	52.0525	0.415346	0.418531
CADHealth_64	NA	880.634	0.0650968	0.478088	0.0899092	0.143862	0.0350151	335.673	1.06413	426.201	0.832457	445.253	0.321135	100.871	1.36556	2.72649	106.951	1.75486	6.82553	155.993	0.281747	0.230055	122.322	0.570139	0.30554	0.519583	0.300483	0.0587767	42.8631	1.00093	0.460407	0.167046	0.483702	55.5235	36.9971	6.3113	88.1485	580.69	3.82629	0.650662	0.509456	118.286	0.564737	0.393396	81.6123	122.769	54.5317	0.444183	0.380787
CADHealth_65	NA	889.74	0.0690749	0.464861	0.0813593	0.136268	0.031728	349.806	1.06886	427.888	0.824018	464.02	0.329923	90.9859	1.40599	2.62629	104.463	1.32983	7.75578	155.183	0.276392	0.218303	123.028	0.730722	0.555618	0.723794	0.443076	0.1093	42.4059	1.59994	0.528453	0.464852	0.582502	47.6981	37.6489	7.73404	84.072	530.361	2.98944	0.646189	0.690832	115.13	0.566347	0.679675	77.5659	112.922	62.8922	0.556952	0.498337
CADHealth_66	NA	1040.79	0.0600128	0.462036	0.257763	0.590667	0.146904	395.474	1.04148	424.443	0.946468	479.762	0.36262	118.762	1.07134	2.84416	130.191	2.55883	7.1934	126.709	0.227604	0.194821	122.827	0.622512	0.367972	0.626965	0.520449	0.219064	42.986	1.60048	0.590463	0.466896	0.631701	49.8127	40.2855	8.17196	90.7523	567.579	3.11049	0.63645	0.659516	116.033	0.606818	0.563962	111.444	135.66	95.1049	0.701051	0.63549
CADHealth_67	NA	694.406	0.0933806	0.500252	0.086637	0.190162	0.0338088	267.713	1.32502	467.58	0.954141	543.839	0.274414	339.495	2.39717	2.59322	275.922	0.795382	6.5883	339.653	0.592442	0.572281	110.753	0.549633	0.309292	0.569564	0.246439	0.0256874	47.577	0.973318	0.473528	0.280001	0.438192	72.4377	65.4925	6.44722	113.442	507.674	2.93059	0.617893	0.374213	149.948	0.788033	0.580173	204.618	226.041	200.026	0.884907	0.825284
CADHealth_68	NA	1117.51	0.0414849	0.421834	0.0877555	0.143964	0.0219469	398.793	1.32306	526.895	0.945758	567.062	0.567075	105.637	1.79877	2.15085	118.621	1.39134	19.2182	132.339	0.221766	0.263241	118.259	0.57024	0.359982	0.626018	0.431817	0.0701421	29.7731	0.914453	0.407324	0.155554	0.435975	37.9446	28.3507	10.5682	77.2496	550.46	2.69178	0.469408	0.199266	98.4007	0.384443	0.126329	73.6701	107.458	46.0234	0.428292	0.45535
CADHealth_69	NA	1138.96	0.122363	0.578885	0.143878	0.180976	0.0656108	252.83	2.2067	477.298	0.918073	483.055	0.585792	130.556	2.80273	1.73899	119.091	0.677955	1.64981	114.323	0.344597	0.315495	111.927	0.64478	0.366093	0.615436	0.509745	0.395237	23.978	0.900454	0.501916	0.360305	0.572854	40.9786	37.2813	15.5882	45.0294	514.644	3.01382	0.64576	0.672509	63.022	0.743773	0.420999	45.154	64.5675	40.5514	0.628046	0.682541
CADHealth_70	NA	1062.14	0.0307855	0.582084	0.185634	0.325036	0.0673634	340.927	1.3285	417.699	0.96191	548.745	0.3432	117.06	1.89991	2.23442	212.257	1.7778	20.4432	100.728	0.146799	0.140699	123.726	0.400731	0.160527	0.385759	0.489423	0.135262	23.9542	1.48467	0.451452	0.32724	0.561463	38.169	25.8393	7.05682	100.818	586.504	3.3767	0.604491	0.503328	73.4604	0.544523	0.345145	55.2012	71.7873	34.7847	0.484552	0.407098
CADHealth_71	NA	969.758	0.054779	0.443857	0.242202	0.463808	0.0394844	350.523	1.56211	505.582	0.989339	488.137	0.511543	134.021	1.5943	1.05791	165.873	0.733467	10.3356	170.783	0.28844	0.274221	110.814	0.763175	0.546639	0.739604	0.433839	0.151413	27.1078	1.16193	0.775102	0.344165	0.451136	54.0753	43.5991	11.2688	55.7064	566.21	2.85384	0.747516	0.120004	90.9543	0.642668	0.39629	77.2671	96.2526	63.4535	0.65924	0.592285
CADHealth_73	NA	1089.27	0.0351252	0.352715	0.0277212	0.0553791	0.0132506	282.313	1.4396	457.686	0.986357	487.609	0.541395	118.972	0.52469	1.59044	182.344	0.965161	8.8014	251.974	0.440409	0.403585	118.759	0.442831	0.30331	0.563982	0.429756	0.215668	33.1758	1.22732	0.337372	0.256579	0.351741	46.6579	30.3542	6.61478	111.74	583.701	3.23038	0.620932	0.258866	117.437	0.415091	0.183947	78.4354	119.654	62.051	0.518588	0.461415
CADHealth_74	NA	1079.1	0.0493032	0.409797	0.0210465	0.0444594	0.00741972	523.071	1.47471	602.875	0.906362	494.702	0.41722	70.0755	2.18589	1.33401	72.0216	0.870495	12.8661	107.211	0.176225	0.243488	109.093	0.670083	0.452503	0.668575	0.296688	0.148286	33.1811	0.64197	0.35945	0.209152	0.326365	47.9062	27.7036	7.85521	97.5813	620.005	2.66288	0.427823	0.252437	109.946	0.41049	0.170533	76.6257	124	48.2524	0.389132	0.441306
CADHealth_75	NA	1240.71	0.0271599	0.483083	0.0417814	0.0770669	0.0105367	344.945	1.95822	478.047	0.963319	488.668	0.526564	131.758	2.85603	3.11403	314.502	2.36358	8.24771	145.485	0.236253	0.21928	124.793	0.379137	0.134365	0.355423	0.353835	0.0399902	30.943	1.11593	0.544616	0.247031	0.379763	44.7438	21.7579	11.5533	74.2133	670.111	3.145	0.592703	0.470077	92.8753	0.463057	0.105908	80.4714	118.83	56.5644	0.476013	0.480497
CADHealth_76	NA	632.941	0.0409648	0.384939	0.114193	0.154456	0.050183	700.498	1.01006	496.091	0.957584	490.398	0.624162	140.732	0.744737	1.33844	167.58	0.765634	14.1691	172.62	0.27109	0.245596	120.605	0.397798	0.172563	0.409611	0.335174	0.0622027	27.1497	1.29832	0.589052	0.320444	0.510569	46.7375	26.6215	8.14602	96.8443	616.854	6.50209	0.326254	0.0471483	110.924	0.403468	0.339985	90.485	121.729	69.9604	0.574721	0.500994
CADHealth_77	NA	1131.31	0.0349657	0.608302	0.252165	0.749747	0.145498	522.881	1.05152	426.965	0.908382	486.929	0.383816	169.035	0.430654	2.53972	310.066	1.82533	8.27904	181.327	0.2715	0.264464	120.359	0.421627	0.160378	0.38898	0.293386	0.117572	33.1431	1.7105	0.59278	0.556304	0.474099	41.6868	33.9624	7.09546	86.3766	539.121	4.19334	0.58035	0.42893	107.871	0.347517	0.244806	94.8936	137.789	73.8758	0.536152	0.51536
CADHealth_78	NA	1071.81	0.0493734	0.407514	0.0202403	0.0593715	0.00745541	826.807	0.895526	420.91	0.8801	567.752	0.475724	167.192	1.05712	1.02276	139.909	0.449122	6.7596	144.29	0.298358	0.294764	119.047	0.577634	0.293641	0.504044	0.316874	0.0856551	32.0313	0.42002	0.539231	0.0574923	0.386765	45.4055	27.9733	7.62978	97.2235	476.422	4.39643	0.430674	0.16243	110.129	0.424162	0.291877	81.7452	132.238	62.6478	0.47375	0.403733
CADHealth_79	NA	1274.37	0.0319934	0.514128	0.0845176	0.173948	0.012587	288.459	0.99728	412.695	0.98262	572.1	0.374803	113.429	2.86953	1.55224	165.103	1.23187	10.9701	141.333	0.211978	0.204722	115.94	0.462889	0.198627	0.424111	0.24605	0.135352	36.3627	0.932721	0.427319	0.318979	0.359521	50.664	38.4772	7.63297	93.299	513.502	3.68234	0.518662	0.215176	114.535	0.566821	0.465059	86.7002	123.683	69.545	0.562283	0.573902
CADHealth_80	NA	740.252	0.0671604	0.475613	0.0759661	0.112423	0.0354517	367.257	1.28051	422.552	0.927486	629.678	0.615881	73.8981	3.08923	2.83447	215.471	1.17757	7.61944	169.146	0.32384	0.30988	122.117	0.449167	0.209981	0.473181	0.522265	0.173662	26.1156	0.568934	0.447344	0.108885	0.624442	59.8769	54.898	8.05822	66.9284	534.452	2.97058	0.842591	0.53041	72.7383	0.689487	0.312856	95.8965	98.4834	84.0158	0.853096	0.779909
CADHealth_82	NA	1118.79	0.0559677	0.625022	0.163857	0.403106	0.0522437	384.84	0.991968	457.309	0.906184	592.967	0.462706	108.033	2.63836	2.11912	131.549	0.950318	12.2388	156.679	0.270432	0.255935	112.189	0.47922	0.22146	0.427641	0.303305	0.0704564	32.1829	0.380072	0.318834	0.080713	0.38628	50.1994	31.251	5.7032	115.01	494.112	2.89939	0.544393	0.216287	113.546	0.646609	0.547518	84.8078	121.549	65.6461	0.540081	0.539731
CADHealth_83	NA	816.002	0.0855557	0.593216	0.2442	0.692344	0.0449008	620.145	1.15041	601.666	0.847154	448.084	0.501996	97.4654	0.206432	0.635211	107.082	0.1299	5.19129	105.576	0.252724	0.223311	118.287	0.525538	0.214353	0.407016	0.297653	0.0766316	34.1787	0.562077	0.369784	0.186919	0.571665	40.0032	35.801	10.1212	65.1369	512.247	2.96083	0.572294	0.254195	71.5933	0.6811	0.44733	58.1777	85.1814	41.7351	0.489956	0.492084
CADHealth_84	NA	1230.11	0.0332052	0.373478	0.021938	0.0523497	0.00808308	326.178	0.970489	424.425	0.841764	535.571	0.303025	185.51	2.10695	1.40088	273.995	0.61889	7.34192	155.801	0.263663	0.255129	119.838	0.499953	0.257753	0.506302	0.409772	0.0366623	27.9696	0.558852	0.424772	0.129175	0.722141	56.4785	39.1354	8.83592	66.0274	540.161	4.5957	0.428988	0.0947219	75.2028	0.64426	0.54687	83.5707	114.837	75.7576	0.659696	0.737614
CADHealth_85	NA	666.596	0.0635869	0.29475	0.0566723	0.0973553	0.0148863	440.929	1.14039	674.533	0.908667	448.186	0.310012	84.3633	1.84522	1.47666	168.463	0.968029	12.1041	155.932	0.256445	0.287263	119.71	0.521821	0.268969	0.518162	0.452886	0.0592411	27.5138	0.577797	0.570846	0.133303	0.644351	45.4804	33.2637	8.97155	70.7414	516.014	3.86935	0.612469	0.178801	84.8779	0.568194	0.309369	71.4901	88.3588	54.8394	0.620645	0.668245
CADHealth_86	NA	1169.37	0.0563098	0.575144	0.0591453	0.115778	0.0165528	276.514	1.286	495.467	0.977859	629.281	0.326499	162.008	3.68318	2.4121	232.105	1.61329	8.77962	202.645	0.357753	0.296979	112.338	0.423658	0.161316	0.345701	0.334076	0.0640417	37.9802	0.675926	0.458975	0.142949	0.459894	60.4929	54.6363	8.06171	81.7873	504.215	2.51295	0.683947	0.453205	100.096	0.584862	0.404651	89.5514	112.124	72.8078	0.64935	0.677143
CADHealth_87	NA	1070.49	0.0635337	0.482695	0.0771961	0.166029	0.0270426	543.866	0.915666	415.874	0.84893	509.962	0.367061	121.371	2.5971	2.4816	239.053	1.96939	9.15966	138.423	0.238338	0.197367	109.874	0.302707	0.0582223	0.180208	0.181101	0.0254475	31.6968	0.390787	0.281665	0.0642759	0.407542	63.3099	44.6293	7.48757	93.3749	563.162	5.3549	0.366376	0.0532372	129.327	0.322522	0.153275	91.8564	121.423	71.3085	0.587274	0.549457
CADHealth_88	NA	1069.64	0.0874891	0.690747	0.154325	0.245247	0.0866449	299.029	1.05475	422.731	0.771412	506.946	0.558752	81.475	0.761612	3.42618	159.275	1.16206	11.2874	117.494	0.185353	0.205473	114.817	0.415603	0.154298	0.375234	0.335676	0.0424724	29.5858	0.597664	0.341695	0.138902	0.517575	51.1891	34.5524	8.65408	90.7189	513.203	4.33646	0.482773	0.224274	109.178	0.522977	0.246466	81.5448	113.133	64.4659	0.569825	0.60824
CADHealth_89	NA	635.003	0.0973055	0.488578	0.0545746	0.0801039	0.0199684	368.115	3.36751	645.97	0.759335	464.281	0.344908	163.329	0.617223	1.75597	63.4623	1.0387	8.96917	55.4288	0.252254	0.176853	117.088	0.517961	0.26078	0.512319	0.401154	0.142587	31.9413	1.05805	0.584864	0.520334	0.618826	31.6007	21.2531	21.725	36.2376	647.657	5.67052	0.573014	0.120962	32.1432	0.422271	0.0972061	15.0839	15.7881	13.6501	0.864579	0.877868
CADHealth_90	NA	970.13	0.070583	0.732561	0.0675377	0.14358	0.0235702	568.336	1.7647	432.42	0.967161	538.271	0.483264	104.203	0.752482	0.998771	144.498	0.477736	8.44427	142.65	0.269495	0.241789	115.017	0.422973	0.162855	0.363549	0.289477	0.0606266	33.3352	1.07882	0.402597	0.272602	0.490671	52.2536	38.1409	7.3981	99.4229	554.587	2.63589	0.663686	0.552987	118.068	0.446798	0.157405	99.4186	131.801	87.8415	0.666469	0.620125
CADHealth_91	NA	940.033	0.090527	0.444645	0.0365765	0.0689425	0.0107982	766.892	1.33159	460.64	0.96292	517.002	0.528534	183.195	2.28636	1.06134	250.245	0.443053	16.6869	254.303	0.606713	0.630457	107.851	0.591548	0.334278	0.554292	0.364355	0.077156	51.9901	1.06809	0.624097	0.276488	0.569899	51.1383	33.6276	6.07794	100.294	526.424	2.64862	0.653053	0.629859	107.435	0.521271	0.277921	71.5685	99.2219	56.6761	0.571205	0.585826
CADHealth_94	NA	1069.08	0.0633394	0.650817	0.0371152	0.0928793	0.0165234	709.842	1.77811	554.78	0.924857	456.258	0.578878	137.39	1.12042	2.75312	222.154	1.76858	16.6476	102.367	0.181009	0.180562	109.539	0.450795	0.176185	0.361057	0.276202	0.0518211	34.6135	1.13676	0.566539	0.313057	0.466401	46.1096	33.639	7.38944	98.5663	558.422	3.91905	0.591922	0.180141	116.946	0.590234	0.202534	100.047	130.506	87.9721	0.674083	0.653627
CADHealth_95	NA	1208.26	0.0335525	0.580211	0.0307342	0.103589	0.0118614	553.222	1.13385	469.748	0.933839	513.207	0.612154	112.736	0.941537	0.852142	188.793	0.38946	12.481	115.615	0.197786	0.241528	118.235	0.326411	0.102916	0.315105	0.324865	0.0248441	28.153	0.18362	0.42688	0.0204601	0.339618	49.4796	32.0001	4.98102	100.091	454.267	2.7126	0.68149	0.582678	107.32	0.612737	0.584832	77.0473	119.447	55.3177	0.463115	0.413674
CADHealth_96	NA	1121.35	0.0943002	0.321354	0.0524037	0.0735147	0.0185255	471.618	1.18642	522.725	0.913269	557.324	0.330876	153.431	0.699027	2.15568	306.276	1.37747	12.9506	251.572	0.478365	0.503047	117.888	0.342831	0.129996	0.362118	0.320224	0.0781968	40.6485	0.757911	0.407069	0.238948	0.66565	47.198	31.3325	6.37001	97.3111	461.898	2.61379	0.62789	0.601647	103.371	0.623866	0.479276	99.7265	128.849	75.2606	0.584097	0.526247
CADHealth_97	NA	1016.99	0.0418061	0.514375	0.0233237	0.0497828	0.00655404	386.16	0.978539	413.436	0.962765	533.049	0.522142	109.844	3.81234	0.737736	182.996	0.430096	19.1318	182.887	0.282967	0.23418	117.314	0.517105	0.268406	0.514935	0.365539	0.208112	30.6755	1.86651	0.57208	0.447922	0.385334	44.1878	28.6736	6.83039	95.0154	461.598	3.991	0.486218	0.246918	113.204	0.316128	0.101572	70.4749	110.563	55.8485	0.505129	0.555406
CADHealth_98	NA	1452.95	0.0540625	0.511703	0.0479716	0.108785	0.0122707	417.041	1.08389	458.774	0.961779	534.877	0.560254	137.504	2.25077	2.02744	257.269	0.949318	22.0993	115.104	0.174958	0.139896	115.012	0.502488	0.312965	0.556809	0.365148	0.153311	32.0562	1.34645	0.721657	0.366448	0.500748	52.2117	39.9433	6.26047	98.6122	536.324	3.10389	0.642381	0.35178	106.842	0.583374	0.31467	90.7175	114.931	78.3891	0.682054	0.614838
CADHealth_99	NA	1223.23	0.0335333	0.459412	0.0450652	0.0654805	0.0201615	328.362	1.64019	489.146	0.927118	532.91	0.526487	158.115	2.30139	1.12928	86.4691	0.54717	4.14948	183.262	0.469433	0.476111	119.036	0.32727	0.104076	0.327115	0.231564	0.0266001	34.2912	1.03953	0.464082	0.229132	0.369366	45.2483	25.4387	13.214	61.0189	645.102	3.4168	0.534826	0.0713644	78.7153	0.437577	0.0862354	55.9019	85.9008	37.733	0.439262	0.468862
CADHealth_100	NA	1214.08	0.0546835	0.498346	0.0606546	0.104979	0.0230022	347.127	1.84334	472.043	0.757984	584.697	0.202034	263.135	1.5234	3.16421	259.638	0.956975	22.7948	104.218	0.157304	0.150678	116.591	0.439561	0.227904	0.491497	0.47433	0.0664466	24.4168	0.852208	0.524613	0.223209	0.48697	44.5125	28.9751	9.27314	63.8993	536.599	4.58838	0.720363	0.273893	71.3558	0.700728	0.417467	76.0115	87.5066	64.5522	0.737684	0.668177
CADHealth_102	NA	1127.21	0.048529	0.652508	0.0324288	0.0580999	0.0180557	710.434	1.43432	416.654	0.932961	480.955	0.496522	156.576	2.17255	1.79012	219.554	1.63275	9.40168	218.47	0.342405	0.366077	117.744	0.478324	0.227878	0.462415	0.284925	0.0429013	43.5489	0.535359	0.371798	0.199179	0.617692	51.8021	38.5394	6.22521	92.1335	560.048	2.49783	0.773846	0.759552	111.852	0.475722	0.334442	89.4991	125.42	69.7675	0.556273	0.563194
CADHealth_103	NA	1278.85	0.0239294	0.550395	0.129039	0.22655	0.0295778	429.694	1.13948	466.827	0.922638	513.097	0.280322	99.4498	3.51206	1.10694	142.681	0.538137	14.2388	122.154	0.18871	0.177256	120.252	0.307004	0.0821176	0.268725	0.414823	0.255858	30.6068	0.328522	0.223851	0.0453588	0.29783	40.07	27.131	10.1301	91.8256	655.427	4.32696	0.465983	0.180605	101.727	0.374078	0.0847267	69.9338	127.085	47.6018	0.374567	0.396411
CADHealth_104	NA	1015.61	0.0973379	0.719645	0.0168427	0.0352319	0.0109578	347.853	1.41787	414.196	0.901159	535.999	0.357968	126.06	1.76171	1.40614	143.987	0.875437	10.8229	170.853	0.260108	0.251633	110.071	0.742049	0.555042	0.747545	0.409042	0.131337	31.9788	2.0433	0.7172	0.499543	0.466858	45.2686	34.6628	7.07392	99.0184	551.364	3.10584	0.654035	0.436569	106.401	0.537249	0.301831	93.1244	131.103	78.9377	0.602104	0.579969
CADHealth_105	NA	789.15	0.0427125	0.359636	0.0734065	0.123612	0.024753	384.254	1.42451	470.676	0.925393	577.705	0.520932	125.311	1.06352	1.05102	159.269	0.698392	9.85342	219.42	0.377501	0.370554	121.707	0.33737	0.0931488	0.271885	0.290167	0.163116	36.9632	0.449371	0.508513	0.271221	0.69425	46.719	28.1203	7.7785	89.4349	581.747	3.64559	0.665809	0.389207	104.744	0.487802	0.208696	86.421	135.104	56.2223	0.416141	0.364457
CADHealth_106	NA	795.724	0.054703	0.546078	0.258436	0.814338	0.115728	766.095	1.25861	421.378	0.866399	462.056	0.482415	95.0247	3.33922	2.84733	127.175	1.61108	18.3069	178.099	0.291268	0.26824	112.405	0.43369	0.184842	0.421252	0.302869	0.205529	35.4165	1.99776	0.598645	0.696386	0.548331	51.2054	37.8205	7.5258	92.3244	524.201	3.53262	0.556605	0.427965	112.2	0.534207	0.50603	87.1655	127.082	70.4784	0.554588	0.511013
CADHealth_107	NA	1184.34	0.0561553	0.63712	0.197651	0.569555	0.071892	368.003	1.07356	467.838	0.987522	553.012	0.704561	97.9813	1.77484	1.89721	112.394	0.55918	12.0626	144.027	0.232658	0.229102	120.045	0.363955	0.112103	0.312767	0.370289	0.0692221	29.7903	1.04112	0.427583	0.230275	0.446329	44.9045	22.9802	7.71108	88.9625	506.587	5.28345	0.371169	0.114068	96.9559	0.480226	0.267643	75.5871	115.441	47.9788	0.415613	0.374169
CADHealth_109	NA	1258.45	0.0304789	0.487367	0.0729052	0.13007	0.0161843	584.081	1.62373	488.444	0.928185	552.662	0.258591	79.964	0.0878129	0.458771	160.207	0.166239	32.3247	120.446	0.232984	0.197054	116.324	0.520518	0.243264	0.462521	0.414333	0.136798	27.4406	0.589381	0.555916	0.264581	0.707754	43.5801	28.1938	11.2414	51.2449	535.194	2.92	0.746633	0.412123	49.2448	0.733004	0.204387	47.6014	55.6704	30.6327	0.550251	0.541568
CADHealth_112	NA	1011.44	0.0517248	0.5475	0.039343	0.0735649	0.0208821	485.338	1.32318	609.344	0.916068	411.677	0.612605	114.536	2.52481	0.586182	165.187	0.165953	7.83728	101.97	0.355351	0.246153	118.3	0.467692	0.233283	0.494957	0.361128	0.0451011	32.0013	0.839912	0.379936	0.168662	0.380662	47.492	28.1466	9.40138	75.1016	528.433	4.30797	0.564382	0.212291	88.2066	0.575888	0.319061	45.7177	62.9236	38.4081	0.610393	0.651771
CADHealth_113	NA	961.919	0.0620962	0.669933	0.0662822	0.140888	0.0372709	490.456	1.21649	561.559	0.906033	388.749	0.720411	106.311	2.11632	2.29047	221.711	1.15951	15.3021	115.204	0.198527	0.183985	102.676	0.703411	0.592145	0.838591	0.33715	0.150738	35.5058	0.655168	0.440718	0.17791	0.458484	58.4666	49.0981	6.18691	107.453	585.318	3.25032	0.707068	0.305467	118.246	0.74292	0.114825	125.005	144.244	117.299	0.813199	0.769273
CADHealth_114	NA	911.927	0.051274	0.628221	0.0514983	0.0804574	0.0205174	456.352	1.36133	477.63	0.920381	563.983	0.746887	220.344	0.963504	2.12193	351.383	1.29822	12.4655	143.987	0.214657	0.19816	104.916	0.64626	0.465169	0.727937	0.382687	0.0875707	33.7913	0.458432	0.370272	0.0977884	0.463193	63.9172	56.2053	6.24546	110.952	530.341	2.56316	0.637053	0.464098	123.771	0.723658	0.517997	146.807	182.364	139.211	0.763369	0.70768
CADHealth_115	NA	1258.06	0.0314019	0.380894	0.0698996	0.109915	0.0184465	648.284	1.92583	481.832	0.983885	490.842	0.355523	162.142	1.11381	1.94069	340.103	1.396	12.8498	153.312	0.270169	0.277444	117.652	0.483548	0.350111	0.621308	0.409244	0.142121	33.6243	0.264407	0.54812	0.271061	0.400653	39.9395	25.1718	11.236	88.1735	662.428	5.5859	0.352486	0.123303	98.6525	0.416586	0.152304	73.5555	110.29	58.8713	0.533787	0.455148
CADHealth_116	NA	1256.08	0.0739504	0.563364	0.0285756	0.0496552	0.00955392	478.412	2.05269	441.89	0.942498	447.189	0.511443	71.1712	0.202257	0.249366	90.9936	0.138053	25.3966	86.1704	0.174669	0.189212	110.62	0.687827	0.450064	0.675571	0.419458	0.151882	32.7751	1.59085	0.626158	0.595641	0.679626	37.552	30.4808	15.8884	50.8231	594.589	1.96965	0.526365	0.178353	58.5865	0.640444	0.0986195	50.8304	58.9201	44.0626	0.747836	0.765452
CADHealth_117	NA	1019.96	0.0505895	0.391579	0.041478	0.0773255	0.0129972	344.393	1.64661	431.835	0.939003	622.381	0.689881	211.141	2.14184	1.34511	203.576	0.852631	11.4085	142.181	0.234292	0.199177	105.021	0.653162	0.416929	0.647337	0.284208	0.106592	33.5996	0.266634	0.475303	0.135839	0.580036	74.1035	66.5046	4.8621	116.123	493.182	1.97096	0.817761	0.688199	143.35	0.910137	0.691529	145.413	161.476	132.638	0.821408	0.815403
CADHealth_118	NA	397.179	0.105434	0.425165	0.0245322	0.0557452	0.00886603	871.106	1.0299	574.543	0.973313	609.02	0.196184	117.013	0.796625	1.0493	206.499	0.568252	22.4181	155.004	0.238597	0.21987	124.264	0.661836	0.441374	0.658896	0.530565	0.0504127	24.6618	0.462554	0.412564	0.127484	0.508932	41.0485	29.9501	10.3307	54.8796	523.017	3.63648	0.711575	0.330338	68.1861	0.8905	0.499823	61.5282	75.8942	47.8392	0.630341	0.590711
CADHealth_119	NA	1114.01	0.0785157	0.713153	0.189696	0.33988	0.0607188	412.687	1.43633	427.738	0.945159	468.76	0.404128	180.329	0.837825	1.62018	233.378	0.53116	6.62521	249.802	0.40182	0.389905	108.555	0.758459	0.56422	0.746313	0.349426	0.0772912	29.4747	0.367454	0.250863	0.0565771	0.434744	55.6637	38.9946	7.8598	97.7206	606.426	3.8297	0.556692	0.388043	106.324	0.465345	0.173769	90.6256	133.724	73.3199	0.548291	0.568703
CADHealth_120	NA	1062.54	0.024023	0.386815	0.0763584	0.171134	0.0211519	419.454	2.07548	530.207	0.974802	550.541	0.176173	99.0449	1.51429	1.16118	125.207	0.802812	23.8178	132.866	0.254509	0.223016	117.653	0.66591	0.44862	0.677168	0.38051	0.108146	30.3408	1.51234	0.458335	0.46513	0.473175	51.0816	38.9282	10.2665	74.7509	599.279	1.52125	0.547414	0.126255	92.2642	0.398211	0.249346	61.808	105.438	38.7591	0.367601	0.379568
CADHealth_121	NA	832.007	0.0713902	0.640433	0.104315	0.204205	0.0411309	557.665	1.14589	434.542	0.905417	502.384	0.564408	120.688	1.4716	1.38253	120.317	1.10631	9.90778	161.064	0.249517	0.272228	96.2368	0.902268	0.800826	0.865765	0.804363	0.507518	33.4856	1.7014	0.860273	0.653665	0.831861	85.6181	83.6188	4.34673	132.693	548.961	1.95276	0.871837	0.757422	153.331	0.899626	0.735904	114.304	121.783	108.229	0.888701	0.86437
CADHealth_123	NA	948.214	0.0283295	0.422785	0.150864	0.219274	0.0479958	450.591	1.0835	413.988	0.961301	560.658	0.329241	210.224	1.65819	1.61644	265.06	1.0087	9.73574	300.116	0.500278	0.448285	123.286	0.62371	0.390093	0.619543	0.395404	0.168633	27.8125	0.599633	0.40911	0.128753	0.498906	57.7086	47.9379	10.5047	74.636	517.314	6.03407	0.362672	0.0758357	85.3024	0.531395	0.142317	71.1548	91.0266	56.6165	0.621978	0.683615
CADHealth_124	NA	1110.59	0.0462197	0.431572	0.0296701	0.0566117	0.0142465	440.137	1.98499	437.925	0.877988	510.372	0.19215	129.009	1.25549	1.19089	231.807	0.739511	27.8785	153.289	0.302578	0.283257	116.273	0.542628	0.256957	0.455358	0.363671	0.103612	34.4368	0.425841	0.327298	0.0985792	0.526912	41.3452	33.8307	7.55778	89.875	653.317	3.05911	0.757159	0.520314	74.5854	0.612804	0.241719	68.818	95.3664	48.1399	0.504789	0.559005
CADHealth_125	NA	949.943	0.113572	0.785854	0.0716412	0.1297	0.0331047	524.034	1.15868	516.874	0.948088	565.346	0.654119	120.852	1.27601	1.55153	164.327	0.745497	2.08297	179.472	0.376302	0.380876	100.318	0.740353	0.569987	0.758891	0.33038	0.0393624	32.6054	0.909506	0.414061	0.260581	0.58743	69.7108	61.2105	4.61677	129.884	547.84	2.19054	0.80646	0.530541	136.287	0.820905	0.551355	129.456	155.872	126.383	0.810811	0.762818
CADHealth_126	NA	1138.35	0.0275035	0.280301	0.036392	0.0645835	0.0107931	704.531	0.992766	446.792	0.96707	555.906	0.331229	91.0341	2.28323	1.25352	96.0771	0.878308	7.98168	174.654	0.286236	0.257139	124.492	0.406363	0.153129	0.378743	0.223994	0.094974	33.2352	0.208682	0.390868	0.0987724	0.43117	53.6685	45.4646	7.67919	91.1726	509.43	5.51532	0.406425	0.149682	111.661	0.351316	0.147035	75.9178	126.297	45.3969	0.359444	0.357878
CADHealth_127	NA	1404.47	0.0557798	0.523113	0.0381723	0.0622461	0.0115571	303.449	1.99597	418.019	0.967051	652.472	0.372933	99.0979	1.87815	2.90694	266.886	1.64746	10.4005	114.209	0.171037	0.155109	116.684	0.380234	0.127057	0.331355	0.269374	0.0914061	37.1351	1.17835	0.486662	0.50287	0.446375	49.3208	30.6284	8.02954	94.0475	603.491	3.10592	0.530004	0.327016	116.313	0.47685	0.156183	91.0271	126.309	70.4816	0.558007	0.528783
CADHealth_128	NA	1750.35	0.0628488	0.338468	0.0225095	0.076953	0.0091521	522.291	1.07425	553.728	0.864272	514.048	0.568706	106.795	0.0709612	1.84052	111.81	0.792257	10.9145	102.221	0.162277	0.169616	119.792	0.623854	0.379622	0.602244	0.504425	0.0783144	27.8151	0.901994	0.416633	0.158434	0.547411	38.1194	31.8921	9.53726	61.3324	535.501	3.19647	0.713727	0.376845	73.4325	0.750491	0.366893	44.6454	51.2538	36.8749	0.719457	0.676568
CADHealth_129	NA	1210.43	0.0574368	0.614202	0.125408	0.199808	0.0429166	288.136	1.22678	456.046	0.935549	464.98	0.518407	134.852	1.17681	2.33248	217.33	0.867196	12.1703	148.653	0.252958	0.234083	113.162	0.633671	0.385474	0.619859	0.319243	0.130089	33.5453	0.576162	0.412277	0.168356	0.410696	53.6663	43.435	7.71436	89.9912	505.188	3.27991	0.585059	0.266391	93.7459	0.490444	0.210142	77.834	116.546	60.1465	0.516076	0.501772
CADHealth_131	NA	969.146	0.0459476	0.528364	0.114882	0.196874	0.0314571	284.145	1.01228	417.913	0.806343	575.03	0.572372	83.3639	1.84577	2.82105	138.839	0.811833	9.55854	131.005	0.203835	0.234776	114.765	0.479972	0.207525	0.434175	0.372076	0.0846153	28.5944	0.679834	0.494858	0.107633	0.546053	46.9514	25.1872	8.90253	88.728	519.343	5.71291	0.389818	0.119166	102.345	0.509798	0.217616	81.8114	123.121	55.2459	0.448713	0.39596
CADHealth_132	NA	953.72	0.0943389	0.71117	0.0922796	0.15858	0.0263357	510.124	0.959649	507.218	0.93031	587.344	0.433001	180.403	2.87593	2.38357	250.843	1.54168	6.55396	183.747	0.339735	0.30808	101.795	0.698802	0.527163	0.774391	0.341606	0.0717824	28.7802	0.669706	0.47345	0.181457	0.465977	51.9245	42.5283	5.00608	115.519	486.665	2.0394	0.818886	0.628419	103.471	0.911295	0.70319	115.273	130.867	105.279	0.804477	0.782359
CADHealth_133	NA	1138.25	0.0412668	0.436058	0.015841	0.0340429	0.00692172	368.356	0.989548	430.055	0.976868	521.777	0.262126	120.85	2.45033	0.94241	138.905	0.683941	8.11285	185.956	0.329335	0.306035	114.049	0.616148	0.361782	0.593972	0.403976	0.157598	35.19	0.194393	0.499751	0.222284	0.456182	46.3563	30.723	6.17525	94.0093	434.28	2.62867	0.586565	0.391906	97.9344	0.564904	0.348499	77.5215	113.932	55.4583	0.486765	0.497621
CADHealth_134	NA	1535.85	0.103933	0.434579	0.0956978	0.150148	0.0414918	284.488	2.4956	451.084	0.874397	487.212	0.554416	112.737	0.93158	1.16829	214.8	0.449312	16.8325	114.766	0.180086	0.202637	107.651	0.601285	0.408579	0.65886	0.385747	0.0944676	34.7184	0.431285	0.444707	0.182142	0.537788	51.2411	48.0961	9.22172	78.3332	580.12	0.479184	0.72186	0.49373	104.361	0.696447	0.507351	85.9681	130.105	67.4579	0.518487	0.478744
CADHealth_135	NA	1082.31	0.0720006	0.564525	0.143276	0.228629	0.0372243	272.705	1.08663	454.237	0.96688	514.581	0.704975	92.0154	1.87943	1.72134	201.997	1.13382	14.3386	164.362	0.271775	0.273969	110.253	0.516704	0.31751	0.596723	0.517689	0.177545	37.4682	1.61599	0.648072	0.579946	0.577145	49.0952	42.5266	7.8784	66.9991	497.291	3.95825	0.737156	0.334565	101.818	0.688209	0.560066	71.7071	92.1294	56.6769	0.615189	0.55674
CADHealth_136	NA	750.093	0.0479675	0.679317	0.102172	0.16114	0.068938	489.066	1.02405	591.208	0.958509	473.373	0.68462	162.586	1.53392	0.994888	259.53	0.932799	4.90118	302.093	0.590491	0.573987	114.145	0.476155	0.212449	0.440381	0.452082	0.134668	31.6957	0.393123	0.573525	0.189549	0.58581	48.975	38.4357	8.04928	86.2359	522.708	4.48128	0.505783	0.207539	101.53	0.715724	0.483868	71.081	91.5479	59.4797	0.649711	0.586205
CADHealth_138	NA	1416.03	0.0473634	0.376939	0.0315316	0.05984	0.010449	383.257	1.70944	451.899	0.811895	479.486	0.426029	96.1505	0.873085	1.03816	135.223	0.495587	15.0257	147.954	0.262104	0.267454	113.853	0.638569	0.407596	0.628399	0.432726	0.0266281	26.0258	0.433964	0.359181	0.0624614	0.55407	42.472	29.3921	15.3537	45.9675	637.895	2.49835	0.567866	0.114814	78.8595	0.605614	0.241136	66.12	78.3164	48.239	0.61595	0.506045
CADHealth_139	NA	537.04	0.0580529	0.586117	0.087814	0.14925	0.0222928	289.263	1.02326	446.892	0.956513	596.072	0.32718	144.337	1.42158	1.81402	181.957	1.23059	14.4148	146.442	0.217784	0.226521	116.359	0.465776	0.190707	0.413825	0.364263	0.134097	40.9569	1.72785	0.694527	0.556434	0.385733	45.2382	31.76	8.08518	75.9845	533.863	3.6034	0.742697	0.34301	102.9	0.485373	0.225813	86.1954	116.203	63.6477	0.547731	0.508933
CADHealth_140	NA	1246.06	0.0384631	0.505939	0.0513324	0.0997457	0.0263806	471.724	1.02493	421.1	0.948008	461.425	0.647169	115.94	0.805821	1.33679	141.142	0.684927	18.0291	120.762	0.210837	0.193455	113.786	0.659102	0.44833	0.66567	0.402456	0.090966	35.8457	1.3131	0.458471	0.474306	0.30769	46.6124	29.6015	8.95891	105.411	582.986	6.62849	0.366538	0.033415	108.415	0.288995	0.0432081	77.2348	114.43	44.2172	0.386413	0.368456
CADHealth_141	NA	1023.64	0.0452345	0.601774	0.0310979	0.0796435	0.0132778	302.424	0.947088	624.712	0.930867	393.588	0.46001	112.222	0.831346	1.51558	324.172	0.646461	12.2125	230.022	0.41171	0.394005	117.988	0.475653	0.197036	0.398951	0.395749	0.16051	32.8847	0.325122	0.409794	0.144044	0.582154	47.2288	34.8525	7.35868	86.4017	502.586	4.09739	0.544499	0.192548	85.0555	0.671407	0.483618	74.352	81.9061	58.2824	0.711575	0.730234
CADHealth_142	NA	1084.49	0.0524469	0.508026	0.0321079	0.0747787	0.0154646	285.681	1.14072	572.408	0.914422	346.884	0.475278	71.5422	0.0662698	0.11615	257.367	0.0552129	0.902932	155.158	0.372561	0.358413	113.662	0.580812	0.289739	0.502657	0.377959	0.114844	31.9785	0.351709	0.424783	0.153677	0.520336	40.8372	25.0933	8.97097	66.2487	525.633	4.19273	0.50547	0.085652	66.85	0.617035	0.247437	59.2305	73.1549	43.472	0.594246	0.600416
CADHealth_143	NA	1462.34	0.0879212	0.618436	0.0243233	0.066792	0.0111727	283.291	1.22519	521.739	0.862825	562.685	0.482273	146.031	1.09258	1.74692	300.621	1.29016	8.62134	182.906	0.274826	0.27338	117.967	0.426127	0.157694	0.372947	0.440117	0.025869	29.2032	0.798202	0.512104	0.177065	0.470654	45.9951	40.5331	12.566	54.6448	633.884	6.05314	0.615673	0.112296	60.0201	0.603472	0.111168	109.57	133.922	94.7583	0.707566	0.690091
CADHealth_144	NA	1197.5	0.0597482	0.548823	0.0468407	0.0675211	0.0145987	520.808	1.54811	456.773	0.952287	475.222	0.670961	105.445	1.9653	2.30292	229.776	1.62727	10.6699	159.729	0.292534	0.320142	114.313	0.618032	0.420863	0.683906	0.500077	0.2853	32.7297	1.85912	0.684573	0.620758	0.659364	40.3532	36.6722	10.6143	60.707	542.081	3.35562	0.680686	0.325028	66.9521	0.608944	0.114433	68.9978	77.0601	51.4504	0.667665	0.660276
CADHealth_145	NA	1102.5	0.0361996	0.545805	0.0393578	0.0914905	0.0121575	700.845	0.997657	429.007	0.966841	530.373	0.434615	251.542	1.59723	3.15569	292.49	2.14989	9.66003	193.063	0.334435	0.286029	115.575	0.508512	0.260917	0.549639	0.466727	0.0849247	24.4205	1.57058	0.744029	0.358171	0.685953	47.84	40.6938	7.18252	77.2102	564.892	2.95625	0.8037	0.707861	77.4925	0.622241	0.432063	90.5731	97.8725	83.923	0.857472	0.872924
CADHealth_147	NA	1110.69	0.0656808	0.54033	0.0928477	0.159709	0.0244389	513.196	1.22462	460.3	0.737378	556.158	0.59622	92.9869	1.55939	2.02931	183.945	0.918547	11.617	203.817	0.330779	0.31422	110.735	0.543265	0.290782	0.520581	0.41333	0.0749236	27.8371	0.685712	0.556393	0.117236	0.546436	49.4424	32.4426	7.68944	68.3193	517.733	2.8765	0.807199	0.442865	84.4479	0.707539	0.299302	90.2495	108.615	78.7909	0.725418	0.744782
CADHealth_148	NA	688.917	0.0844727	0.538266	0.0963804	0.162564	0.0230988	413.959	0.977185	457.371	0.94541	546.223	0.312628	128.115	1.08407	0.66339	146.029	0.260054	22.3613	117.754	0.171989	0.145397	115.313	0.574006	0.355802	0.604025	0.379318	0.111662	38.9192	0.58122	0.421058	0.246772	0.45118	48.1221	35.0559	7.13044	92.1532	540.313	3.60655	0.668024	0.45155	96.5589	0.6378	0.460128	89.9475	130.285	75.1441	0.576767	0.548446
CADHealth_149	NA	1172.91	0.0314908	0.512086	0.0752164	0.122574	0.0128949	321.569	1.54792	402.654	0.958796	468.619	0.272854	208.406	2.8185	2.61793	349.728	1.96704	9.65096	227.304	0.380326	0.354258	117.213	0.539158	0.4369	0.728488	0.527499	0.038702	29.8344	0.680043	0.411687	0.1297	0.30973	49.2458	37.3016	8.01757	82.7853	503.633	3.04106	0.657494	0.785331	103.97	0.365173	0.103142	86.4806	124.26	76.8971	0.618843	0.542652
CADHealth_150	NA	1882.96	0.0425886	0.598739	0.0847727	0.114343	0.0231765	322.217	1.39852	436.065	0.940826	486.503	0.379345	175.065	1.67021	1.76731	206.254	1.00733	7.14125	212.375	0.35596	0.313852	124.591	0.435879	0.128944	0.2977	0.326587	0.143871	32.5311	1.94358	0.530596	0.376387	0.3403	41.3937	25.8193	10.4696	98.0631	545.271	3.66471	0.268497	0.0778452	111.877	0.358088	0.164766	72.2819	118.792	54.3881	0.457843	0.450017
CADHealth_151	NA	1007.4	0.0439018	0.401787	0.117133	0.197494	0.0402184	837.711	1.16146	500.093	0.96502	577.014	0.295719	108.479	0.469816	0.865849	127.277	0.414013	14.5994	155.005	0.240754	0.240719	108.977	0.554002	0.289615	0.53525	0.3769	0.278513	31.2402	0.304481	0.527752	0.25158	0.440209	50.1687	35.8556	7.9068	98.6064	534.774	3.79492	0.404932	0.268733	117.059	0.483054	0.26956	85.7462	133.387	62.6411	0.46962	0.439056
CADHealth_152	NA	994.543	0.0935198	0.665951	0.0291983	0.0634153	0.0182407	269.291	1.004	506.882	0.975488	468.372	0.467687	220.816	2.89902	2.84779	288.901	2.08044	8.61957	265.713	0.410146	0.382596	97.6065	0.80572	0.663504	0.818601	0.366865	0.116432	43.28	0.740951	0.580407	0.315663	0.597237	81.3924	68.8547	5.13384	118.912	520.766	2.22523	0.800107	0.561562	133.876	0.768347	0.746801	143.286	154.771	132.315	0.854909	0.816518
CADHealth_153	NA	1361.04	0.0419948	0.422568	0.0475699	0.0821775	0.0120725	302.858	0.965335	533.493	0.896338	493.239	0.626386	129.735	1.29764	2.3362	280.25	1.3402	9.99769	186.126	0.287843	0.245783	120.098	0.41158	0.146222	0.345123	0.31751	0.0741321	33.8234	1.4264	0.640806	0.465347	0.375114	46.8001	30.5277	8.53972	87.4522	547.982	4.20086	0.492548	0.156216	102.867	0.526956	0.253265	86.6473	129.734	66.8364	0.51518	0.464674
CADHealth_154	NA	1454.19	0.0540907	0.481822	0.0569145	0.106537	0.0164568	324.016	1.45199	435.227	0.880808	559.355	0.508773	135.165	1.72078	1.76073	202.229	0.647863	16.3786	206.322	0.345631	0.327242	117.82	0.542045	0.269025	0.480257	0.347881	0.109063	28.5594	0.821329	0.371798	0.120625	0.476893	56.806	42.7965	10.0564	89.6824	577.954	3.78966	0.405112	0.191677	111.567	0.328848	0.11244	82.0159	130.659	63.5576	0.486439	0.436941
CADHealth_156	NA	841.727	0.0356106	0.366184	0.0206468	0.0443299	0.00636277	581.975	1.03067	464.126	0.920624	554.538	0.234562	146.525	2.34177	2.27258	235.535	1.52576	7.25997	211.81	0.330707	0.293314	118.049	0.465369	0.203783	0.431653	0.349976	0.0892032	33.7363	0.29163	0.483558	0.238648	0.426706	44.2275	29.5771	7.11834	99.0964	493.488	3.46473	0.448654	0.194665	110.126	0.480752	0.207871	65.2685	99.8285	48.7974	0.488812	0.390922
CADHealth_157	NA	1195.01	0.0354745	0.322464	0.0220828	0.0410229	0.0125475	737.299	1.71516	506.526	0.995927	673.978	0.366008	116.057	2.34496	1.66946	147.929	1.25192	7.20919	131.647	0.21495	0.196925	111.629	0.531319	0.280864	0.539196	0.293646	0.034247	37.8791	0.436207	0.483075	0.157423	0.488799	51.0308	36.9849	9.05133	85.5876	601.937	3.37372	0.500872	0.296674	106.84	0.514235	0.308748	70.9722	113.27	51.5735	0.455315	0.384384
CADHealth_158	NA	1134.98	0.0323132	0.47126	0.0202561	0.0420797	0.00882216	629.734	1.50746	412.415	0.887037	547.782	0.395216	154.639	3.29705	2.29189	297.461	1.76467	6.5497	272.355	0.425826	0.38961	117.41	0.667396	0.471973	0.714216	0.533972	0.211648	34.0639	1.1451	0.461831	0.341926	0.572196	37.6602	31.1094	9.99278	60.7429	626.892	3.40726	0.763009	0.445743	55.7588	0.787053	0.531558	60.1209	64.3826	51.5306	0.800382	0.787289
CADHealth_159	NA	1112.16	0.0910373	0.58932	0.159768	0.223328	0.0552033	335.655	1.66851	430.422	0.705729	571.185	0.539676	96.0139	0.0310754	0.515788	93.3183	0.0905511	20.0888	82.4907	0.162224	0.113563	112.653	0.623278	0.394004	0.659542	0.496175	0.115564	27.5283	1.25298	0.519541	0.332235	0.691775	51.9914	42.4079	11.9696	56.3856	540.526	3.20124	0.701285	0.310968	85.5943	0.492686	0.0591986	62.1509	84.3355	52.3916	0.621229	0.612778
CADHealth_160	NA	1300.75	0.0898057	0.630532	0.0290262	0.104345	0.011881	380.349	1.15874	540.885	0.880421	565.737	0.493948	103.167	0.659723	2.98301	226.974	1.37296	7.39403	184.624	0.315698	0.319347	117.318	0.571621	0.330529	0.570117	0.291241	0.0588247	47.5319	0.595996	0.511677	0.103776	0.650223	52.9221	45.4285	7.45255	96.3815	573.729	2.77575	0.650544	0.326223	106.127	0.465623	0.178348	84.8397	124.625	71.1951	0.571275	0.568518
CADHealth_161	NA	672.708	0.0867432	0.570734	0.0925699	0.176775	0.0441785	389.504	1.04789	427.279	0.957218	600.733	0.505276	136.791	2.62668	1.52982	194.314	0.942318	7.87395	138.138	0.213121	0.211032	96.8809	0.86201	0.752553	0.817537	0.543307	0.108625	30.978	0.919091	0.776995	0.288729	0.824325	69.1851	66.0902	6.62042	82.1079	526.733	3.26853	0.774943	0.319349	103.917	0.692265	0.27026	149.023	153.255	140.908	0.919436	0.862437
CADHealth_162	NA	957.93	0.024549	0.482912	0.0471164	0.0689671	0.00990628	289.687	0.904527	402.773	0.991602	641.66	0.217791	214.758	1.80571	2.16052	303.975	1.50034	7.0296	187.274	0.284152	0.263431	121.023	0.543779	0.321619	0.588943	0.354173	0.120177	27.5829	0.13574	0.372477	0.102334	0.426385	50.1621	39.1919	8.00449	99.9578	484.504	3.35622	0.324808	0.114314	117.496	0.278827	0.0812547	76.7369	135.321	52.4369	0.3875	0.333572
CADHealth_163	NA	920.708	0.0234365	0.412143	0.0403361	0.0712792	0.00872018	301.018	0.871539	400.032	0.965829	625.835	0.217131	223.968	1.71506	2.3738	316.813	1.58503	9.31452	198.341	0.304429	0.271127	122.576	0.550578	0.305709	0.53961	0.353548	0.0813095	27.5943	0.125907	0.439469	0.114246	0.426561	49.4193	32.9667	7.72123	103.251	466.99	2.98616	0.307956	0.106949	115.095	0.295313	0.0885402	73.6385	131.358	49.6724	0.378145	0.322334
CADHealth_164	NA	1092.77	0.0999372	0.640561	0.0871644	0.146649	0.0343388	346.368	1.1367	608.747	0.969067	533.415	0.665331	142.392	0.711588	0.521562	131.644	0.338008	9.06406	276.535	0.431342	0.398499	92.4335	0.915116	0.849311	0.926923	0.390974	0.137825	26.0583	0.829597	0.439248	0.210595	0.403548	50.3012	35.672	8.23631	96.0845	525.615	3.7381	0.50797	0.20389	93.4273	0.454673	0.0517784	85.8637	120.982	68.5565	0.566667	0.577163
CADHealth_166	NA	969.137	0.073188	0.40908	0.0412582	0.0770021	0.0243896	414.605	2.85519	550.438	0.882546	402.126	0.496552	80.533	0.0758504	0.0956884	109.894	0.053686	24.9752	101.522	0.210528	0.206864	119.078	0.377197	0.108863	0.275988	0.318111	0.0310176	29.0929	1.36712	0.659336	0.348232	0.40773	49.5646	35.2199	14.0463	54.78	679.489	3.12719	0.740862	0.334186	85.8661	0.709011	0.389087	70.1398	104.517	55.9859	0.535663	0.459535
CADHealth_167	NA	1308.52	0.061335	0.536067	0.0644905	0.157118	0.0199644	321.652	0.92768	476.542	0.962194	515.767	0.56377	160.003	1.9788	2.87842	247.223	1.68336	6.77847	205.194	0.405986	0.349271	112.046	0.476528	0.204196	0.434867	0.184324	0.0118605	34.475	0.558539	0.251727	0.0909682	0.309298	49.7226	27.9763	6.21412	100.573	424.698	2.69749	0.516725	0.264327	105.263	0.684954	0.616644	79.9269	114.564	57.5987	0.502765	0.543362
CADHealth_168	NA	791.238	0.0724575	0.384368	0.124144	0.209127	0.049266	327.61	1.02509	418.818	0.720081	543.073	0.412265	161.494	2.22248	2.97217	181.489	1.36057	16.3568	110.413	0.177211	0.186119	117.018	0.416382	0.177657	0.417594	0.345314	0.0284665	32.3315	0.599547	0.306389	0.0884927	0.66125	46.7365	30.8583	7.601	103.142	458.657	4.85315	0.336452	0.115829	117.203	0.323446	0.0816479	94.8728	138.539	79.3861	0.573023	0.566786
CADHealth_169	NA	1346.73	0.0415633	0.418255	0.0617787	0.0957264	0.023123	283.827	1.67012	591.877	0.401502	515.228	0.36734	84.1411	0.0657536	0.774717	95.1966	0.188679	10.1721	97.1309	0.195056	0.178402	115.218	0.660301	0.435441	0.646892	0.31172	0.144844	29.7565	0.895701	0.576598	0.383921	0.612531	42.8144	27.5681	10.7302	81.6498	597.246	2.50595	0.396388	0.0402571	78.9066	0.421908	0.0919984	43.4047	70.1826	26.9852	0.3845	0.422002
[truncated: 332 more rows]
[truncated: 398 more columns]
